# Supplementary material
Source: publisher figshare collection journal article supplement (https://frontiersin.figshare.com/ndownloader/files/21928479)
Supplement: Supplementary file 1 [file 21928479]

## Sheet: Roncalli-SupplemnetaryTableS4
Table S4: List of differentially expressed genes (DEGs) with their relative expression as RPKM (Log2+1)for all 61 females labeled as they appear in the clusters(CL1-CL4) identified in Figure 1.
seq_id	Cl1	Cl1	Cl1	Cl1	Cl1	Cl1	Cl2	Cl2	Cl2	Cl2	Cl2	Cl2	Cl2	Cl2	Cl2	Cl2	Cl2	Cl2	Cl2	Cl2	Cl2	Cl2	Cl2	Cl2	Cl2	Cl2	Cl2	Cl2	Cl2	Cl2	Cl2	Cl2	Cl2	Cl2	Cl2	Cl3	Cl3	Cl3	Cl3	Cl3	Cl3	Cl3	Cl3	Cl3	Cl3	Cl3	Cl3	Cl4	Cl4
W5c4519|c1_g1_i1	0	0.12	0.52	0.42	0.74	0.36	0	0.2	0	0.54	0	0.36	1.5	0.32	0	0.12	0.24	0.62	0.59	0.14	0.69	0.27	0.12	0	0.96	0	0.23	0.51	0.18	0.37	0	0.36	1.42	0	0	0	0	0	1.2	1.51	0.92	0	0	0.29	0	0	0	0	0.2
W5c11060|c0_g1_i2	1.6	1.83	1.29	1.3	1.39	1.48	0.7	2.71	3.06	0.89	1.46	1.57	1.39	1.51	1.43	1.72	2.09	0.72	1.33	2.52	1.14	1.53	0.88	2.22	1.23	2.46	1.25	0.34	1.56	1.73	1.32	1.49	3.82	2.14	1.45	2.83	1.59	0.89	1.48	0.88	0.87	1.26	1.1	2.87	1.77	0.3	0.64	1.4	1.55
W5c18959|c0_g1_i1	0.15	0.3	0.26	0.13	0.4	0.25	0.31	0.88	0	0.27	0	0.24	0.12	0.14	0.41	0.29	0.15	0	0.56	1.41	0	0.5	0.15	0.36	0.22	0.14	0	0.13	0	0.16	0.17	0.26	1.56	0.31	0.59	0	0.2	0.14	0	0.11	0.33	0.43	0.21	0.18	0.32	0.23	0.39	0.26	0.05
W5c10430|c0_g1_i1	0	0.13	1.13	0.45	1.37	0.62	0.39	0.11	0.26	1.75	0	0.44	0.2	0.47	1.64	0.63	0.13	0	0	0	0	1.44	0.13	0	0.19	0.62	0.63	2.77	0.78	0.53	1.01	0.59	49.34	0.27	0	0.55	0	0	7.3	0	0	0	0	0	0	0	0	0	0
W4a30233|c0_g1_i1	1.18	0.57	0.2	0.41	1.34	0.74	0.24	1.36	0.58	0.11	0.99	0.63	0.37	2.63	0.21	0	0.12	0.24	1	0	1.64	2.59	0.46	0	2.65	0.78	0	0.5	0.53	0.96	1.56	0.86	1.02	0.48	1.15	0.69	0	1.05	0.58	1.13	1.28	0.66	0.81	0.85	0.49	1.06	0.3	0.36	0.31
W6b13620|c0_g2_i2	9.71	6.82	6.57	3.43	4.87	6.28	3.38	5.19	6.84	7.06	5.83	5.16	4.79	13.1	2.63	1.69	2.93	3.18	10.89	3.88	8.3	10.82	4.32	1.55	17.74	18.23	4.26	3.49	4.7	8.7	7.44	6.98	11.6	6.92	13.25	8.45	19.72	12.15	7.64	4.66	9.4	8.66	6.29	3.88	5.05	4.4	4.16	5.64	1.41
W4a13158|c0_g1_i1	1.96	1.2	0.31	0.46	0.31	0.85	0.09	2.7	0	2.37	0	1.03	0	8	0	4.18	0	0	0	0	0.29	7.32	0.35	0	2.38	0.34	0	0.23	0.66	1.27	0.39	1.34	0	0.18	0	0.44	0	8.53	20.58	0.52	1.25	0	3.56	0	0	0.53	2.06	0	0.83
Contig142	37.6	0	36.26	964.26	16.53	210.93	2.66	15.3	0.69	58.67	64.93	113.67	21.91	29.58	42.88	17.75	0	31.95	26.54	31.86	1017.51	1.65	1636.7	6.9	980.67	0	0	51.81	91.87	0	34.5	211.79	6.69	41.04	15.25	19.65	3.23	15.21	105.67	38.93	57.02	195.76	156	15.54	20.23	53.09	10.85	15.27	43.74
Contig34762	1.7	3.91	13.38	0	0.06	3.81	7.81	16.23	0	0.41	0.07	4.11	0.25	0.29	0.17	0.38	2.99	0.4	0.16	3.67	9.28	0	0.19	0	0.19	0	0.13	3.15	0.05	56.7	57.24	7.12	1.99	13.93	0	27.36	0	44.65	4.12	5.57	0.21	1.01	0.18	0.63	0.34	1.56	12.15	1.17	0.71
Contig26328	28.09	0	0	0	0	5.62	5.55	0	0.47	1.69	0	1.29	1.35	0	5.1	0	0	0	0.39	0.18	15.07	0	0	3.9	0	0	0	9.81	0	0	0	1.88	10.91	0	0	0	0.42	3.67	9.03	0	0.69	0	0.44	0.76	0	0	0	0	0
W1a9777|c0_g2_i1	9.35	11.92	11.08	0	9.93	8.46	0.37	3.68	36.44	4.66	2.73	12.39	1.02	8.16	0	2.15	10.43	1.54	19.51	36.03	10.1	15.59	1.65	0.44	8.24	4.95	11.72	14.72	7.5	12.77	9.26	9.25	3.21	4.01	3.26	1.25	36.74	8.14	3.01	4.27	21.06	5.24	6.96	0.45	9.92	5.03	3.36	22.57	6.88
W4a4480|c1_g1_i1	0.77	1.18	0.61	0.39	0.5	0.69	0.77	1.05	1.08	0.57	0.67	0.69	1.3	0.46	0.8	0.37	0.26	1.32	1.01	0.15	1.42	0.85	0.44	0.3	1.02	0.85	0.43	0.54	0.33	0.98	0.99	0.73	1.5	1.12	1	1.18	1.19	1.37	0.95	0.66	0.42	1.17	1.15	0.46	0.4	0.19	0.16	0.56	0.43
Contig23213	0.68	0.6	3.65	0.05	0.2	1.03	0.17	0.42	1.79	0.2	3.54	1.05	1.1	0.25	0.05	0.6	1.3	0	7.28	0.58	0.28	13.42	0	0.2	0.12	0.05	2.62	0.19	0.13	0.12	0	1.49	13.8	0.23	2.85	1.04	0.08	0.25	0	0.08	0	4.52	0.16	0.14	0.29	0	0	0.33	0.47
W4a30663|c0_g1_i1	0.33	1.41	0.56	0.28	0.85	0.69	0.97	1.07	0.64	0.58	1.19	0.74	2.65	1.3	0.58	0.16	0	0	0.59	0	0	0.36	0.64	0.76	2.23	0.62	0.94	0.96	0.24	0.33	0.54	0.68	2.29	0	1.58	0.14	0.86	0	0.6	0.24	1.23	2.28	1.35	0.39	0.17	0	2.09	0.27	0.05
W4a4480|c1_g1_i4	1.14	1.35	0.71	0.27	1.33	0.96	0.95	0.78	1.82	0.73	0.73	0.91	1.03	0.73	0.68	0.24	0.63	1.18	1.31	0.36	0.83	0.56	0.37	0.15	1.24	1.74	0.61	0.59	0.47	1.55	1.12	0.81	1.93	0.78	1.72	1.06	1.35	1.63	1.65	0.7	0.62	1.07	1.14	0.68	1.19	0.19	0.65	0.34	0.57
W4a1163|c0_g1_i1	0.64	0.77	0.27	0.83	0.97	0.7	0.8	1.57	0.63	0.57	1	0.76	1.24	1.99	0.43	0	0	2.14	0.77	0.73	1.7	0.18	0.94	0.37	2.42	1.51	1.38	0.54	0.36	0.81	0.53	0.95	1.62	0.98	0.77	0.53	0.64	1.42	1.38	0.59	1.55	1.34	1.98	1.15	0	0.24	0	0.45	0.53
W5c7805|c0_g1_i1	0	6.39	0.16	0.08	0.08	1.34	0.09	0	1.45	0	1.53	0.51	0	0	0.25	0.97	0.09	0	0	0	0	0	0	37.25	0	0.17	7.79	0.78	19.57	0	0.2	3.53	6.31	0	0.09	5.43	0	0.08	17.04	0	8.55	0.39	0	0	0	0	0	0	0
Contig33250	0.48	0.29	0.36	0.26	0.47	0.37	0.24	0.4	0.24	0.43	0.19	0.3	0.33	0.65	0.22	0.64	0.6	1	0	0.28	0.64	0.27	0	0	0.17	0.11	0.12	9.92	0.04	0.25	0.13	0.81	2.97	0.49	0	1.56	0	0.32	0.37	5.56	0.13	0.17	0.17	0.58	0	0.54	0.16	0.07	0.04
W4a29935|c0_g1_i2	1.31	0.23	0.44	1.45	4.44	1.57	0.32	1.11	1.02	2.09	2.03	1.24	0.62	2.13	0.82	0.95	0.12	0.37	1.35	4.2	1.43	0.87	1.71	1.68	5.63	1.88	1.23	1.85	6.47	0.41	2.15	1.89	1.83	0.94	1.12	0.73	0.21	3.22	6.35	2.93	1.08	1.45	2.47	0.81	1.08	0.83	2.92	0.67	1.24
W2b15482|c0_g1_i1	19.28	13.39	19.25	14.15	14.24	16.06	14.05	25.09	13.2	20.92	20.15	16.69	16.54	22.3	32.96	23.92	37.2	8.08	18.26	30.28	35.51	36.55	44.65	27.4	33.66	16.48	15.73	24.75	32.6	23.24	35.89	27.16	38.95	30.06	30.91	32.17	39.5	31.16	25.11	25.21	36.62	31.6	31.13	11.23	16.97	24.7	25.65	9.79	5.81
Contig34472	0	0.19	0	0.17	0	0.07	0	0.47	0	0	0	0.08	0.3	0.34	0	0.18	0	0.2	0	0.22	0	0.21	0	0	0	0	0	0.33	0	0	0	0.09	0	0.2	0	0	0	0	0	0.85	0	0	0	0	0	0	0	0.05	0
W6b26780|c2_g1_i3	5.92	2.6	2.96	10.19	3.9	5.11	5.16	5.66	2.59	5.39	6.68	4.79	4.22	2.88	8.98	7.79	4.53	14.76	3.26	17.54	7.83	26.23	8.49	2.82	6.47	3.19	2.92	2.51	2.15	1.9	3.71	6.96	4.41	2.89	3.14	6.99	2.47	4.16	26.5	67.13	2.16	4.34	4.75	2.4	4.87	18.01	2.92	1.35	2.69
W4a11940|c0_g1_i1	0	0.57	0	0	0	0.11	0	0.32	0	0	0.41	0.14	0	0	0.62	0	0	0	0	0	0	0	0	0	12.75	0	0	0	0	0	0	0.7	0	0	0	0.99	0	0.79	0	0	0	0	0	0	0	0	0	0	0
W4a1925|c0_g1_i1	2.6	0.18	1.75	0	0.16	0.94	2.41	0.3	1.65	0.82	0.39	0.93	1.58	0.99	0.83	0.36	0.37	1.34	2.48	0.43	0.91	1.02	1.09	0.43	2.95	1.93	1.25	0.31	0.28	0.38	0	1	1.45	0.76	1.26	0.31	2.71	2.31	0.46	0.96	0	1.82	2.04	0.89	0.96	1.66	0	0.73	0
W4a4480|c1_g1_i2	0.54	1.25	0.65	0	1.12	0.71	0.64	0.53	0.74	0.48	0.78	0.72	1.75	0.96	0	0.41	0.11	1.66	1.7	0.25	1.67	1.06	0.21	0.25	1.63	1.93	0.52	0.45	0.24	0.77	1.54	0.9	1.09	0.88	1.46	0.45	0.86	1.62	1.99	0.63	0	1.51	1.33	0.52	0.67	0.64	0.28	0.3	0.39
W5c173|c0_g1_i1	0	0.16	2.46	1.02	0.15	0.76	0.17	1.66	0.33	1.2	1.23	0.77	0.39	0.9	0.15	1.46	0.34	2.26	0.82	1.94	0.41	0.19	1.32	0.2	0.37	1.6	0.65	0.43	0.63	0.86	1.67	0.87	1.45	0.52	0.65	0.56	0	1.5	1.46	0.87	0.91	3.55	1.4	0	0.18	0.25	1.08	0.28	0.28
W3d30707|c0_g2_i1	10.02	0	3.12	8.22	0.15	4.3	12.25	0.28	0	29.67	0	7.28	0	0	0	0	0	0	0	2.38	1.98	21.05	14.03	11.32	0.25	14.06	0	0	13.09	2.47	3.42	4.42	0.81	0.88	22.1	109.34	0.23	29.62	1.5	11.58	0	12.11	0	0.41	0	5.17	11.1	8.86	6.93
W5c4438|c0_g1_i1	2.58	0.7	0.8	0.36	0.75	1.04	3.4	1.38	0.1	0.76	0.57	1.1	0.35	0.03	1.63	0.33	0.03	0.35	2.59	1.66	0.93	1.17	0.54	0.08	1.14	0.98	1.69	1.22	0.56	0	2.27	0.92	2.77	1.27	2.03	1.37	0.5	0.24	1.02	0.68	1.42	1.98	1.85	0.58	2.36	1.65	0.13	0.14	2.2
W4a31756|c1_g2_i3	0.12	0.12	0.72	0.93	2.91	0.96	0.6	2.06	0	1.27	0.25	0.7	0.19	0.74	0	0	0	0.12	1.01	0	0	0.79	0	0.14	8.09	0.11	0.23	0.3	1.77	0.24	0.66	0.76	0.65	1.58	2.54	3.87	0	1.8	0.3	0.35	6.33	10.7	0.33	0	0.62	0.53	0.46	0.1	2.61
W6b15858|c7_g1_i1	0.17	0	0	0	0.15	0.07	0	0	0	0	0	0	0	0	0	0.17	0	0	0	0.2	0	0	0	0	0	0	0	0	0	0	0	0.02	0	0	0	0	0	0	0	4.74	0	0	0	0	0	0	0	0	0
W6b18226|c0_g1_i1	0.17	7.85	1.95	0	0	1.99	0.17	0	5.61	0	0.73	1.09	0.47	0	0	0	0.35	1.08	0	0.4	0.14	2.97	0.17	0	0.44	4.05	0.67	0	1.43	5.96	0	0.95	0	3.12	0.34	4.87	0.81	0	5.4	4.63	3.12	6.98	0	0	0.09	3.52	0	0	1.27
Contig33999	0	0.28	0	0	0	0.06	0	0	0	0	0	0	0	0	0	0	0	0	0	0	0	0	0	0	0	0	0	0	0	0	0	0	0	0	0	0	0	0	0	5.19	0.21	0	0	0	0	0	0	0	0
W6b8981|c2_g1_i1	0.38	6.86	0.33	1	0.84	1.88	0	3.47	5.69	0	0.6	1.63	0	1.37	0.34	2.39	0.76	0	2.33	1.32	3.61	0.42	2.44	0	2.22	2.72	0.19	0	0	1.17	3.38	1.3	0	2.75	3.9	0	4.59	9.88	0.71	3.95	1.66	4.84	1.59	0.46	0	0	1.73	0.27	0
W0d676|c0_g3_i3	0.27	0.35	0.36	1.29	0.25	0.5	0.61	0.48	0.65	0.59	0.31	0.47	0.75	0.61	0.39	0.44	0.73	0.21	0.59	0.79	0.32	0.5	0.18	0.79	0.65	0.43	0.3	0.73	0.14	0.42	0.33	0.49	0.36	0.77	0.41	0.5	0.48	0.91	0.76	0.46	0.59	0.7	0.65	0.83	0.39	0.61	0.16	0.31	0.7
W6b12436|c1_g1_i2	0	0.38	0.17	0	0.34	0.18	1.16	0	0	0	0.2	0.23	0	0	0	0	0.39	1.8	0	0.45	0	0.43	0	0	0	0.73	0	0	0	0.4	0	0.22	0.3	0	1.13	0	0	0	0	3.43	0.21	0	0	0.7	0	0.29	0	0	0
W4a4903|c0_g1_i2	0	1.01	0	0	0.91	0.38	0	0.11	2.55	0.25	0	0.49	0.27	0	0	0	0.07	0	0	0	0	0.23	0.07	0.33	3.67	0.2	1.68	0.18	1.97	0	0.08	0.46	1.14	0.07	0	0.46	0.09	1.79	0.09	3.08	0.15	0.2	0.29	0.33	0	0.1	0	1.07	0.09
W1a25764|c0_g1_i3	0	0	0.16	17.92	0	3.62	0	0.15	2.36	0	0	0.97	14.51	2.12	0.65	0	0	0	0	0	0	0	0	1.29	0.26	3.64	0	3.88	0	0	23.8	2.64	0	0	7.1	0	21.42	30.94	11.8	13.63	0	2.31	0	0	0.76	0	0.24	0.1	0.43
W0d5673|c0_g1_i1	0	0.14	1.09	1.82	0.37	0.68	1.12	0.46	0.7	0.75	0.44	0.58	0	1.5	0.13	1.08	0.28	0.14	0.85	0.97	0.8	1.08	0.69	0.49	0.71	0.8	0.95	0.12	0.42	0.29	0.31	0.61	1.21	0.57	0.54	0.7	0.37	0.5	0.7	0.41	0.61	0.2	0.77	1.18	0.58	0.21	0	0.39	0.33
Contig40278	0.85	0.64	1.71	0.33	0.91	0.89	0.95	1.4	0.38	0.34	0.4	0.63	0.44	0.93	0.17	1.09	0.38	1.96	1.38	0.33	0.62	1.46	0	0	0.69	2.52	0.64	0.32	0.35	2.03	3.97	1.01	1.11	1.07	2.21	3.16	0.38	2.45	1.29	1.33	2.67	1.73	1.83	1.59	1.48	0	0.37	0.96	0.31
W3d31249|c1_g1_i1	2.13	0.26	0.61	1.38	0.62	1	0.53	0.73	1.41	0.63	0.56	0.67	0.9	2.14	0.95	0.17	0.27	1.19	0.86	0.1	0.73	0.78	1.3	0.73	1.35	2.02	0.51	0.23	0.59	0.82	2.35	0.95	0.56	0.54	2.32	1.33	1.18	3.39	1.32	0.92	1.35	2.24	3.31	1.49	1.85	0.66	0.46	0.6	0.65
W4a7678|c1_g1_i2	3.19	1.5	0.69	1.05	3	1.89	1.47	2.21	0.67	2.35	1.01	1.47	2.09	2.28	0.38	1.25	0.38	3.29	2.14	1.06	1.75	1.61	1.73	0.29	3.52	3.02	1.58	0.39	0.53	1.41	3.14	1.68	1.21	1.59	1.67	2.41	1.73	4.37	1.35	1.92	3.73	2.77	8.34	2.07	4.42	3.89	0.49	1.84	0.72
W5c430|c0_g4_i1	1.83	0.54	0.34	0.21	1.59	0.9	0.56	1.18	0.71	0.78	0.08	0.58	0.74	0.78	0.28	0.38	0.71	0.57	0.77	0	1.04	2.88	0.62	0.19	0.75	1.05	0.54	0.13	0.41	1.3	1.14	0.75	1.3	1.22	1.54	0.93	1.16	2.61	0.89	0.47	2.84	0.89	3.29	0.29	1.49	0.95	0.1	1.07	0.47
W3d29092|c0_g2_i1	0.33	0.97	1.14	0.06	1.1	0.72	2.19	0.82	0	0.3	0.49	0.68	0.26	0.59	0.18	0.19	0.13	0.14	0.32	0.31	0.38	0.58	9.45	0.08	4.81	1.95	0.13	0.11	0.15	0.07	0.81	1.09	0.05	0.75	6.26	0	1.68	5.85	0.33	1.81	0.07	0	0.18	2.95	0.14	0.9	0	0.97	0.38
W1a25764|c0_g1_i2	0	0	0.16	64.54	0	12.94	0.18	0	2	0	0	1.78	50.93	0.33	0.33	0	0	0	0	0.21	0	0	0.54	32.37	0	0.35	0	6.05	0	0	103.27	10.23	0.43	0	8.35	0	78.39	137.92	23.14	58.99	0	0	0	0	2.29	0	0.47	0	0.06
W6b13414|c2_g1_i1	1.49	3.25	1.41	0.52	1.11	1.56	0.3	4.29	2.36	2.06	0.16	1.57	0.52	1.46	0.07	1.22	0.3	1	3.26	0.77	0.79	3.03	0.22	0.96	1.24	3.11	0.86	0.06	1.39	4.42	6.57	1.65	1.4	1.37	2.17	6.41	0.4	2.99	1.02	3.41	6.72	3.66	2.47	2.6	3.42	2.01	0.67	1.36	0.74
W6b28647|c0_g1_i1	4.01	4.4	2.42	8.35	9.92	5.82	3.68	7.75	5.8	4.63	4.41	4.88	5.22	12.56	3.1	1.25	2.27	8.94	10.93	2.37	8.17	3.22	3.61	1.27	10.89	12.53	3.03	2.57	4.84	4.98	6.92	5.72	8.47	4.55	14.19	8.58	9.36	13.01	6.18	10.22	11.16	8.36	7.48	3.12	6.55	2.76	3.63	7.02	3.52
W0d2853|c0_g2_i1	0	0.78	0.69	1.73	0	0.64	1.6	1.98	0	0	0	0.6	0	0	0	3.85	2.6	0.21	0	0	0.16	0	0.39	0	0.14	0	0	0	1.19	0	0	0.45	0	0	3.3	0	0	0	5.71	0	0	0	0	0	0	0	0	1.35	0
W5c5594|c0_g1_i1	1.43	4.07	4.37	0	1.06	2.19	1.05	0	40.28	0.04	0	6.89	0	0.45	0	25.95	2.77	0	0.41	0.39	0	0.83	0.08	0	0.09	0	0.08	10.19	0	7.34	0	2.56	45.61	2.32	0	0	0.22	0.15	0	0	0	35.35	0	0.05	0.09	0.06	0	0.05	0.13
W6b9111|c1_g3_i1	8.29	0.85	0	0	19.67	5.76	5.99	2.03	0	0.16	22.64	5.14	4.79	0.63	0	1.18	2.81	3.09	12.42	8.5	6.64	0	0	0	0	0	0	0.3	0	0	10.48	2.68	0.55	3.07	7.18	4.55	0.23	8.78	28.39	4.55	0.57	2.23	4.62	0.42	1.1	0	1.81	0	0
W5c16536|c0_g2_i2	0	2.9	0	0	0.07	0.59	0	0	0	1.33	0.08	0.24	0.64	0.07	0.13	0.94	0.07	0	0	0.09	0	0	0.59	0	0.11	0	0	0	0	0.15	0	0.15	5.8	0.08	0.22	0	0	0.07	0	0	0	0	0	0.18	0	0	0	0	0.05
W4a21596|c0_g1_i6	0.38	2.47	0.99	0	0.56	0.88	0.13	0.94	0.63	1.25	0	0.49	0.59	0.57	0.23	0.37	0	0.13	0	0	0.42	0	0.13	0.15	2.49	0.73	0.62	0.54	0	1.17	0.14	0.44	1.4	2.09	1.49	1.28	0.51	0.68	1.11	0.94	0.69	0.54	0	0.15	0.13	0.57	0	0.57	0.13
W4a17884|c0_g1_i1	1.89	0.99	0.74	0.89	1.94	1.29	1.37	0.99	2.21	0.92	0.36	1.15	0.93	2.44	1.22	0	0	0.18	1.66	2.56	2.25	0.38	1.68	0.4	2.97	1.95	1.32	0.58	0.76	0.87	1.89	1.27	2.14	0.35	2.33	0.57	1.59	4.42	1.06	1.14	1.49	2.16	1.89	3.29	1.78	0.51	0.44	1.01	3.86
W7b2581|c0_g1_i2	0.15	3.37	0	1.51	0	1	0	0	0	0.39	5.3	0.95	0	4.4	0	0	0	0	1.23	0	0	1.27	0.28	0.34	16.45	0	0	0	0	0	0.16	1.27	0	0	1.55	0.12	0.58	6.45	5.57	0	0	0	0.2	0	9.97	0	0	0	0
Contig32167	0.41	0.17	0.25	0.2	0.2	0.25	0.18	0.05	0.29	0.21	0.43	0.19	0.14	0.21	0	0.11	0.12	1.57	0.14	0	0	0	0.06	0.07	0.13	0.11	0.23	0.05	0.04	0.12	0.45	0.19	0.05	0.06	0.06	0.15	0.93	0.21	0.51	5.04	0.06	0.16	0.08	0	0.06	0	0.38	0.11	0.14
W0d4931|c0_g1_i3	1.91	3.5	1.8	4.73	1.11	2.61	2.48	2.67	1.7	2.49	2.39	2.19	2.86	5.16	0.91	2.2	1.27	1.11	2.7	2.63	1.98	0.98	1.06	1.04	5.33	1.81	4.42	1.19	2.03	2.34	1.4	2.23	3.23	2.15	3.95	2.97	2.03	3.05	4.33	3.75	1.93	2.68	3.25	3.28	1.92	1.33	1.96	1.69	1.83
W6b2941|c2_g1_i1	0.56	0.72	0.16	0	0.16	0.32	0	0	0.18	0	0.97	0.19	0.14	0	0.83	0.54	0	0	0	0	1.53	0.61	0	0	0	0	0	1.89	0	0.38	0.21	0.32	0	0	0	3.26	0.74	0	0	2.75	1.82	0	0	0	0.58	0	0	0.05	0
W5c12770|c0_g2_i2	0	0	3.99	0.3	2.06	1.27	0.09	0.22	0.35	0.39	0.18	0.3	0	0.08	0.63	1.01	0.17	0	0.43	0	0.79	2.02	0.51	1.03	0	1.16	0.59	9.05	0.78	0.36	0.19	0.99	53.33	0	0.34	2.26	0	1.09	4.34	0.06	0.09	0.12	0.85	0	0	0.52	0	0	0
W5c25780|c0_g1_i1	0.17	1.49	0	0.59	0.15	0.48	0	0.56	1.36	0	0.36	0.41	0.13	0.31	0.15	0.49	0	0.88	0.21	0.98	0.14	1.13	0	0	0.5	0.32	0	0.29	0.25	1.22	1.13	0.43	0.8	1.4	0	0.71	0.91	0.61	0	0	0.37	0.48	0.24	0.21	0.18	0	0.22	0.62	0.11
W5c8088|c0_g2_i1	3.34	1.14	0.83	0.47	0.09	1.17	0.86	0.71	0.32	0.77	0	0.46	1.5	0.58	0.48	0.93	0.54	0.11	1.96	0.74	0.09	0.71	0.84	2.01	0.08	0.1	0.73	0.18	1.04	2.41	0.36	0.81	1.77	1.65	0.83	1.34	1.86	1.53	1.86	0.48	1.52	1.06	0.3	0.13	0	0	0	0.45	0.64
W5c28659|c0_g1_i3	4.83	3.08	18.25	22.73	19.61	13.7	6.18	10.24	6.4	16.76	8.47	11.32	18.37	47.67	13.37	4.35	5.49	13.94	5.98	4.99	15.42	7.1	3.78	5.76	21.07	36.67	2.61	5.07	16.22	15.66	16.37	13.68	28.83	16	19.66	24.53	13.86	4.81	27.98	3.49	2.3	23.43	6.13	13.79	26.44	14.58	29.67	12.02	1.86
W7b6150|c0_g1_i2	2.2	1.29	1.44	2.04	2.63	1.92	2.79	1.42	1.28	1.82	0.76	1.57	0.9	1.29	1.22	1.83	1.33	1.33	1.1	1.82	1.95	1.79	2.31	2.73	1.66	1.65	1.42	1.17	1.26	1.43	2.42	1.61	2.5	1.9	1.85	1.81	2.32	1.89	1.43	1.84	1.43	2.61	1.94	1.25	4.09	1.19	2.65	1.32	1.41
W4a9457|c0_g1_i1	5.1	2.2	3.29	2.94	3.51	3.41	7.75	0.87	3.46	3.1	3.28	3.6	3.82	4.06	4.77	4.66	3.82	5.45	2.57	5.23	2.41	9.98	1.07	3.24	3.2	1.74	1.75	1.69	1.42	2.99	2.45	3.49	3.05	2.37	2.66	5	1.82	5.43	2.13	12.68	3.62	3.21	3.63	2.99	1.55	2.85	6.02	3.05	5.15
W4a2101|c0_g1_i1	0.93	0.9	0.8	0.81	1.47	0.98	0.75	1.07	0.55	1	0.2	0.73	0.15	1	1.84	0.54	0.75	2.31	2.5	0.21	1.22	0.62	0	0.44	2.3	0.18	0.72	0	0	1.33	0	0.85	0.58	0.38	0.72	1.25	1.24	1.49	0.93	0	4.25	1.57	1.55	0	0.39	0	0.48	2.09	0.19
W6b19624|c0_g1_i1	0	18.7	5.17	3.09	0.57	5.5	0	5.88	0	8.53	0	3.23	0	11.15	1.89	4.68	2.43	0.67	8.09	0.37	5.32	1.96	0	0	5.99	0.31	4.71	1.65	0	2.32	5.01	2.98	14.86	7.31	4.88	4.33	2.59	2.02	0	2.39	0.35	17.1	2.91	0	0	2.19	0.42	0	0.05
W5c15898|c1_g1_i1	1.8	1.42	1.27	0.85	0.71	1.21	0.33	1.35	0.32	1.31	1.37	0.89	0.51	2.63	0.59	0.63	0.33	0.51	0.8	0.38	1.21	2.52	0.64	0.38	1.06	0.62	0.16	0	0.37	3.34	3.78	1.08	1.28	1.51	1.75	1.5	0.22	2.33	0.41	1.09	1.6	1.84	4.07	1.57	1.02	1.71	0	1.1	0.65
W6b15562|c1_g1_i2	2.73	2.64	2.19	0.63	2.06	2.05	0.36	4.93	1.44	0	3.6	1.72	0	5.51	0.49	0.35	1.63	1.31	1.54	1.25	2.38	1	3.2	0.43	1.31	1.03	0.35	2.31	0	0.56	1	1.35	3.83	3.16	4.76	2.42	0.48	1.45	2.25	5.35	2.95	5.35	2.01	2.62	2.46	1.9	0.23	0.36	0.18
W5c9029|c5_g1_i1	0	0.75	0	0.17	0	0.18	0.19	0.16	0	0	0.61	0.16	0.3	0.17	0.52	0.93	0	0.2	0	2.22	0	0.42	0.57	0	0.42	0.18	0	0	0	0.2	1.7	0.41	2.72	0.4	0	0	0	0.17	10.06	0	0	0	0	0.23	0	0.29	0	0.7	0
W4a2478|c0_g1_i1	0.37	0.35	0	0	0.48	0.24	0.37	0.3	0.36	0	0.38	0.23	0	0.81	0.33	1.05	0.36	0	0	0	0	0	0.72	0	1.19	0.87	0.35	0.77	0	0	0.4	0.36	0.71	0.75	0.35	0	0.97	0.65	0.23	0	0.4	0.51	0.5	0	0.38	0.27	1.17	0	0
W4a28306|c0_g3_i1	0.15	0.15	0.26	0.26	0.13	0.19	0	0.25	0	0.53	0.47	0.21	0.23	0.94	0.54	0	0.3	0	4.37	0	0.25	0	0.15	0	0.87	0.99	0.14	0.76	0.22	0	0	0.51	0.7	0	0.44	1.37	0.4	0.53	0.37	0	0	0.21	0	0	0.16	0	0	0.29	0
W3d25441|c0_g1_i3	0.19	0.59	0.88	2.7	0.49	0.97	0.37	1.07	0.65	0.21	0.92	0.66	0.18	0.62	0.92	0.36	0	0.19	0.11	0.37	1.45	1.95	3.06	0.11	0.98	0.93	0.85	4.19	1.04	2.04	3.8	1.22	0.07	1.72	2.3	0.82	0.62	1.53	1.39	1.89	2.73	0.26	0.96	0.22	1.12	0.7	0.66	0.52	0.73
W4a12242|c0_g1_i1	0.41	0	0.88	0.35	0.89	0.51	0.41	0	1.62	0	0	0.34	0.79	0	0.18	0	0	0.63	0	0.47	0.33	0.67	0	24.36	13.13	0	8.67	0.17	0.61	1.87	0	2.73	23.93	0	15.04	0.68	14.92	1.09	0	0	1.11	0	0	0	1.28	0	0	0.06	0
W5c25456|c0_g1_i3	0	0.3	0	0	0	0.06	0	0	0	0	0.32	0.08	0	0	0	0	0	0	0	0.53	0.5	0	0	0	0	0.29	0	12.22	0.23	0	0	0.72	9.59	0	0	2.17	0	0	0	0.57	0	0.22	0	0.92	0	0	0.39	0	0
Contig35930	0	0	0	0	0	0	0	0	0	0	0	0	1.17	0	0	0	0	0	0	0	0	0	0	0.29	0	0	0.73	0.53	0	0	0	0.14	0	0	0	0	0	0	0	3.98	0.27	0	0	0	0	0	0	0	0.08
W6b12045|c0_g1_i2	0.17	0.08	0.07	0	0.11	0.09	0.08	0.07	0.16	0.11	0	0.07	0.06	0	0.07	0	0	0	0.3	0.1	0	0.59	0.33	0.15	1.38	0.39	0.08	0.07	0.37	0.25	0.55	0.25	0.13	0.34	0	0.8	0.22	0	0	7.67	0.36	0.12	0	0	0.17	0.12	0	0.19	0.06
W3d6323|c1_g6_i6	0.55	1.21	0.34	0.14	0.2	0.49	0.78	0.77	0.08	0.07	0.49	0.42	0.55	2.3	0.14	0.52	0.55	0.32	1.61	0.9	0.7	2.49	1.84	0.18	0.68	2.14	0.9	0.07	0.41	1.67	0.86	0.99	0.85	0.48	1.06	1.5	1.35	4.58	2.03	0.75	1.78	0.44	1.72	0.37	0.81	1.05	0.3	0.72	0.28
W5c20128|c0_g1_i1	0.11	0.21	0.19	1.03	19.12	4.13	0	3.93	0.75	9.86	0	2.44	0.67	2.71	2.81	8.02	0.11	0	8.18	18.33	2.22	8.23	0.11	0	0.94	0.72	28.2	17.02	23.81	0.78	0	6.47	62.05	0.11	1.37	5.25	1.3	10.81	0.27	0.08	5.89	5.33	7.79	4.69	0.34	0.32	1.96	1	0.36
W6b20655|c0_g3_i1	0.4	0.19	0.17	0	0	0.15	0	0	0.39	0.35	0	0.12	0.15	0.53	0.71	0.19	0.4	0	0	0.91	0.33	0	1.17	0.93	0.43	0.38	0.19	0.34	0.44	0.41	0	0.39	0	1.02	0	0	0	1.41	0.49	3.07	0.65	0	0.55	0	0.83	0	0	0.11	0.2
Contig18954	1.54	0.66	0.29	0.74	0.35	0.72	0.63	2.06	0.28	0.66	0.06	0.66	0.8	1.12	0.51	0.66	0.4	0.41	0.9	0.39	1.58	2.31	0.33	1.27	1.4	1.51	0.66	0.77	0.72	1.51	0.69	0.94	1.6	0.47	1.05	0.71	1.44	1.01	2.04	0.38	1.3	1.04	0.71	0.82	0.53	0.09	1.46	0.57	0.19
W5c18363|c0_g1_i1	0	0.19	0	0	0	0.04	0	0	0	0	0	0	0	0.17	0	0.56	0.19	0	0	0	0.32	0.21	0	0.45	0	0	0	0.99	0	1.19	0	0.21	1.36	0.2	0	0.16	1.03	0	0.72	0	0	0	0	0	0	0	0	0	0
W7b2644|c0_g1_i2	9.78	0.27	0.49	6.01	0.25	3.36	3.26	0.93	7.29	0.76	0	2.09	55.65	8.2	0.25	13.59	0.14	0	19.44	2.6	6.84	11.51	20.11	0.17	3.58	14.22	6.97	13.08	9.47	6.36	0.47	10.14	1.88	86.63	3.3	14.04	9.79	5.04	4.74	2.19	15.5	0.99	0.78	1.19	44.24	0	0.73	2.3	6.34
W3d13126|c0_g1_i8	3.6	0	1.43	0.38	0	1.08	0	0	0	7.27	0	1.21	0	9.71	0.86	1.43	0	0	2.35	0	0	0	27.35	0	0	16.64	1.02	0.3	0.07	0.99	0	3.19	0	0	4.26	0	1.87	31.46	12.73	0	0	5.17	0.12	0	0.18	12.48	0	0	0
W3d5362|c0_g2_i1	0	0.4	0	0	0.12	0.1	0	0	0	0	0	0	0	0.37	0	0	0	0	0	0.96	0	0	2.18	0	0.1	0.26	0	0	0.21	0.14	0	0.22	1.41	0	0.27	0	0.18	0.62	1.2	0	0	0	0	0	0	0	0	0.04	0
W4a19998|c0_g1_i1	0.64	0	0	0	0.69	0.27	0	0.26	0	0.85	0	0.21	0.87	0.99	0	0	0.32	0.33	0.39	0	0	0.18	0.31	0.37	0.69	0.91	0	0	0.24	0.49	0.35	0.34	0	1.3	2.32	0.13	0.21	0.85	0	0	0.69	0.45	0.44	0	0.5	0	0.41	0.18	0.05
W4a1605|c0_g1_i1	0.84	0	0	0.29	0.73	0.37	0	1.38	0	0	0	0.29	0.52	0.3	0.45	0	0	0	1.02	0.38	0.55	0.18	0.33	0	1.69	2.7	1.62	0.57	0.37	0.68	1.84	0.69	0.92	1.03	0.65	0.84	1.11	0.3	1.24	0.25	0.73	2.58	1.15	0.2	0.17	0.5	0	1.17	0.5
W5c9487|c1_g1_i1	0	0	0.32	0	0	0.06	0	0	0	0	0	0	0	0	0	0	0	0.19	0	0.22	0.93	0	0	0	0	0.71	0	0	3.92	0	0	0.31	5.74	0	0.18	0	0.25	0	0.23	0.14	0.2	0	0	0	0.39	0	0	0	0
W6b6049|c1_g1_i4	1.75	0.75	0.5	0.17	0.93	0.82	1.36	0.72	0.29	0.52	0.1	0.57	0.68	4.59	0.7	0.47	0.19	0.2	1.42	0.89	1.43	1.6	1.33	1.02	1.41	4.42	1.13	0.49	0.65	1.29	1.82	1.35	1.29	0.3	1.13	2.11	1.68	3.54	4.7	1.79	2.32	1.23	1.07	0.93	1.72	1.45	0	1.06	0.84
W5c6109|c0_g1_i1	2.95	0.2	0.52	0	0.18	0.77	0	0	0	4.88	0	0.81	0	6.79	0.45	0.78	0.71	0	0.86	0	0.08	1.56	0.1	2.14	0.95	0.96	0.98	1.46	1.13	4.25	1.45	1.3	3.02	4.88	1.58	3.47	2.56	10.75	2.64	0.52	3.63	0.14	0.14	0.12	0.32	0.3	0.78	0.17	3.33
W4a6216|c0_g3_i1	1.8	0	0	0	0.79	0.52	0	1.24	0.45	0.13	0	0.3	0.23	2.14	0.54	0	0	0.31	2.92	1.21	0.49	0	0.74	0	1.52	1.28	0	0.38	0.56	0.15	0.83	0.7	0.35	0.92	2.04	0.25	1.2	0.94	1.12	0.89	1.14	1.05	2.28	0.36	0.78	0.9	0	0.25	0.2
W4a11866|c0_g1_i1	0.29	0.71	1	0.13	0.64	0.55	0.29	0.36	0.58	0.91	0.3	0.43	0.34	1.56	0.39	0.56	0	0	0.35	0.5	1.43	0.64	0.29	0.51	2	1.38	0.28	0.87	0.22	0.89	1.13	0.7	0.57	2.24	0.57	0.36	1.55	0.78	2.71	0.11	1.58	0.2	1.41	0.53	0.91	0.66	0.19	0.2	0.15
W5c30190|c0_g1_i1	3.19	3.2	2.03	1.05	1.67	2.23	0.83	3.61	2.08	1.76	1.13	1.68	1.43	8.8	0.63	1.59	1.02	2.83	3.02	1.24	2.4	4.69	1.43	0.82	7.32	10.32	2.4	0.65	0.62	6.5	6.66	3.39	3.09	2.02	3.27	19.06	2.96	7.82	3	4.27	9.81	5.81	5.89	5.12	7.03	7.15	1.07	2.54	1.31
W7b23192|c0_g1_i1	0	0.88	0	0	0	0.18	0	0	0	0	0	0	0	0	0	4.72	0	0	0	0	0	0	0	0	0	0	0	0	0	5.76	0	0.55	0	0	0	0	0	0	11.96	0	0	2.3	0	0	2.47	0	0	0	0
W4a5988|c0_g2_i1	0.9	2.1	0.77	1	0.45	1.04	0	0.84	6.59	0	0.13	1.26	0	1.14	0.11	0.25	0.64	0.53	0.62	0.73	0.1	2.25	0.25	0.75	3.79	3.63	4.07	1.19	0.29	1.7	3.24	1.33	3.6	4.45	2.98	1.07	1.36	2.27	1.74	3.2	2.36	8.43	1.41	1.69	1.07	3.64	0.66	0.36	0.55
W4a28903|c0_g1_i4	0.35	0.69	1.52	0	0.62	0.64	0	1.31	0	0.16	0.19	0.28	0.55	0.16	0	0.51	0.53	0.73	0.86	0	0.15	1.56	0	0.41	3.33	1.68	0	0.3	0.53	2.71	0.39	0.76	2.08	1.27	2.75	1.62	4.48	3.31	1.54	1.18	1.15	0.75	0.49	0.85	0.37	3.98	0	0.3	0.18
W4a29325|c0_g2_i1	0.61	0.59	0.35	0.18	0.88	0.52	0.61	1.17	0	0	0.85	0.44	0.16	0.9	0	0.39	0	0.63	0	0	1.5	0	0.79	1.42	1.03	2.69	4.31	0.17	0.45	0.41	0.45	0.81	3.49	2.91	1.57	0.17	1.08	5.41	0	1.64	0.22	0	3.08	1.22	0.21	0	1.3	0.45	0.13
W6b30092|c0_g1_i2	2.34	2.46	2.33	3.51	2.42	2.61	2.39	1.79	3.06	2.41	2.29	2.33	2.58	4	2.57	3.34	3.69	1.83	2.55	3.5	2.51	2.38	4.03	4.24	3.51	3.3	2.15	1.46	1.25	2.68	4.13	2.93	2.84	4.03	4.61	4.24	2.15	4.71	4.47	9.63	2.57	3.71	4.98	5.87	3.1	3.27	3.19	2.24	2.84
W4a18185|c0_g1_i1	0	0	0	0	0.35	0.07	0	0	0	0	0	0.04	0	0	0	0	0	0	0	0	0	0	0.19	0	1	0	0	0	0	0	0.87	0.11	0	0.61	0	0.33	0	0.53	0.98	0	0.65	0	0	0	0.41	0	0	0.11	0
W4a25030|c0_g1_i1	0	0.16	0	13.29	8.82	4.45	0	7.63	0.33	0	1.06	1.56	3.54	502.26	0	0.32	0	0.87	6.56	0	1.11	0	15.36	0.99	117.77	0	0	0	0	2.07	0	34.25	1.32	0.86	222.13	9.98	0	185.8	4.6	0.37	301.93	9.7	60.28	0.2	0.35	0	0.87	0.38	0
W6b16696|c0_g1_i1	2.13	0	0	0	0	0.43	0	0.16	0	0	0	0.03	0	0.17	0	0.37	0	0	0	0	0	0	0	0	0	6.61	3.74	0.16	0.14	0.99	0.21	0.65	0	2.38	0.19	0	4.64	0.17	7.93	3	0.21	1.09	4.01	0	0	0	0	0.05	0
W4a23369|c0_g1_i1	0.14	0	1.2	0.24	0.24	0.36	0	0.34	0.69	0.12	0.29	0.24	0	0	0	0.8	1.11	0	0	1.28	0.23	0	0.14	0.49	2.52	0	0	0	0.21	0.14	0	0.36	1.2	1	0	0.12	0.37	0.62	0	0	1.21	0.39	0.19	0	0.29	0.21	0	0.23	0.88
W5c31019|c3_g2_i3	3.93	1.9	1.55	1.7	1.5	2.11	1.14	2.22	2.59	1.46	1.88	1.72	4.38	1.75	1.24	2.12	1.22	2.19	1.49	2.53	3.62	1.35	1.92	1.05	1.83	2.01	2.53	2.84	1.34	0.83	2.97	2.06	9.9	0.59	3.73	1.43	2.82	2.76	2.13	2.41	2.22	1.49	2.93	2.06	2.3	2.2	2.63	1.81	1.95
W4a26639|c0_g2_i5	1.31	0.28	0.31	1.64	0.13	0.74	1.02	0.18	0	0.13	1.29	0.44	3.06	0	0	0.07	0	0.15	0	1	0.42	0.08	0	0.77	10.85	0.21	1.69	0.49	0.16	0.15	2.09	1.12	0.57	1.34	2.12	2.79	3.68	0.19	0.27	0.16	1.26	0.1	1.61	0.44	0.08	1.64	0.09	0.06	0.05
W6b15991|c0_g2_i2	0	0	0	0.04	2.22	0.45	0.74	0	0	0.04	0	0.13	0	2.79	0	0	0	0.08	0.55	0	0.1	0	0.2	0.39	0	0.43	0.28	0.07	0	1.55	0.72	0.38	0.71	0.13	0.2	0	0	0.95	0	11.25	0	0	0	0	0	0	0	0.05	0
W3d14490|c0_g1_i1	0	0.53	0.16	0	0	0.14	0	0.15	0	0	0	0.03	0	0	0	0	0	0	0	0	0	0	1.98	0	0	0	0.36	0	0	0.38	0	0.14	0.86	0	0	0	0	0	0.68	0	0	1.29	0	0	0	0	0	0	0
W4a25576|c0_g1_i1	2.23	0.11	0.2	1.42	2.96	1.39	0.47	2.02	0	0.42	1.84	0.83	1.46	2.61	0.42	0.67	0	1.09	1.42	1.88	1.73	0.26	1.15	0.14	3.14	2.67	0.23	0.4	1.05	0	1.29	1.14	1.28	2.52	2.16	2.15	0.62	1.88	2.47	0.43	1.27	1.97	2.91	0.99	0.73	0.35	0.6	0.82	0.58
W5c15534|c2_g1_i1	0.11	0.32	0.38	0.1	0.19	0.22	0	0	0.33	0	0	0.06	0	0.89	0.2	0	0	0	0.27	0	0.09	0.73	0	0.39	0.32	0.63	0.32	0.47	0.41	0	0	0.25	2.26	0.23	0.65	0.19	0.44	0.3	0.14	0.25	0.12	0.62	0.61	0.27	0	0.17	0	0.09	0
W6b30400|c0_g1_i1	0	0	2.23	0	0	0.45	0	0.27	0	0.87	0	0.19	0	0.14	0.43	0.31	0.65	1.17	0	0	0.27	0	0	0	0	0	0	0.14	1.81	2.15	0	0.37	0.25	0	0	0.54	0.86	0.14	0.8	2.03	0.18	0	1.12	0	0	0	0.21	0.05	0.16
W3d29551|c0_g1_i1	0	0.9	1.16	1.89	1.09	1.01	0	0.43	0	0.92	0	0.23	0.16	1.02	0.65	1.29	1.24	0	0	0	0.17	0.68	33.55	1.21	1.2	0.1	0.8	0	1.16	1.48	0.69	2.39	1.3	0.96	1.91	2.77	2.9	1.85	5.27	0.15	6.3	2.18	0.57	0.5	0.22	0	0.4	0.06	0.86
W4a6364|c1_g1_i1	0.9	0.87	0.86	0.35	2.18	1.03	0.5	1.4	0	0.98	0.73	0.64	0.78	1.34	0.98	0.77	0	2.48	2.07	0	1.88	0.55	0.98	0.7	2.82	1.14	0.87	0.17	0.45	0.82	0.99	1.04	1.72	1.13	2.33	1.75	1.2	2.22	0.99	0.74	1.3	1.68	3.17	1.32	1.77	2.84	0.77	0.81	1.19
W4a4551|c0_g3_i1	0.25	0.48	0.28	0	0.36	0.28	0	0.27	0.08	0.15	0.09	0.1	0.06	0.52	0.37	0.32	0.08	0.17	0	0.29	0	0	0.32	0.29	1.5	0.39	0.72	0	0.25	0	0.09	0.28	0.39	1.19	0.24	0.07	0.55	0.29	0.21	0.98	0.36	0.47	0.23	0.2	0.17	0	0.32	0.12	0.3
W6b21588|c0_g1_i1	0.86	9.18	1.93	0.15	0	2.43	0	0.28	0	0	0	0.26	6.57	0.15	0.93	1.16	2.58	1.25	0.42	0	1.27	8.72	0	0.4	1.37	0.65	1.67	7.75	1.41	0.53	0	1.94	2.97	21.02	0	1.15	10.1	0	0.21	14.89	0	5.81	5.48	0.41	0.18	0.52	1.78	0.63	4.52
W4a11278|c0_g2_i1	0	0.76	0.4	0	0	0.23	0	0	0	0.56	0	0.09	0	0	0	0.15	0	0.16	0	0	0	1.21	0.92	0	5.22	0.15	0.61	0	0	0	0	0.44	0.25	0	0	0.26	0	0.42	0.19	0	0.85	1.76	0	0.38	0	0.7	0	0.04	0
W2b23558|c0_g2_i1	36.73	3.26	7.47	1.57	8.93	11.59	0	9.06	12.32	0.46	0.14	3.71	0.81	10.4	269.55	1	0	0	39.22	178.36	133.49	0.28	0.63	0.3	0.37	7.25	0.88	426.9	246.95	7.54	421.59	91.87	26.15	23.88	5.53	212.51	40.67	367.92	0.8	0	169.8	11.64	0	12.14	1.76	0.39	1.83	0.4	0.82
W2b23558|c0_g1_i1	34.07	2.02	6.5	1.47	10.12	10.84	0	6.75	10.46	1.97	0.14	3.22	0.2	9.19	259.83	0.38	0	0	41.51	160.1	130.01	0.29	1.53	0	0.09	4.94	1.26	293.39	246.08	8.78	436.72	83.91	29.16	25.09	4.93	200.51	50.44	360.36	1.29	0.19	183.11	11.16	0.36	12.52	2.99	0.39	1.68	0.44	1.34
W5c8493|c0_g1_i1	0	0.19	0.42	0	0.26	0.17	0	0.08	0.19	0	0	0.05	0.15	0.44	0.35	0	0	1.82	2.74	0	0	0.11	0	0	0	0.19	0	0	0	0	0.22	0.32	9.51	0	0	0	0	0	0	0	0	0	1.62	0	2.04	0	0	0	0
W5c15614|c2_g1_i1	1.4	0.39	0.34	0	0	0.43	0.2	0	0	0	0	0.07	0.16	0.36	0	0	0	0	0.97	0.23	0.65	1.1	0	0.7	0.87	0.57	0.19	0.85	0.3	5.1	0.44	0.66	2.19	0.41	3.68	0.67	5.04	1.24	0.74	0.74	0	0	0	1.92	0.21	0.3	0.51	0.28	0
W3d25761|c1_g1_i4	3.84	0	0.12	0	5.7	1.93	0	0	0.28	0	0	0.05	2.32	0.63	0.89	0.14	0	0.15	0.35	0.65	3.96	0.16	32.17	1.33	0.72	0.81	2.06	3.98	2.43	0.44	5.01	3.06	6.56	0.73	1.79	0.36	4.54	1.01	0.88	0.21	5.4	2.59	1.37	0	1.48	0.21	1.65	1.16	1.18
W3d23130|c0_g1_i1	0	6.76	22.45	2.23	0	6.29	0.83	1.97	2.46	0	0	0.91	33	1.23	1.89	16.41	3.12	0	0.56	0.95	0.15	0	19.55	7.32	32.97	4.09	0	27.97	0.89	2.25	7.9	8.43	13.59	0	31.84	0	20.17	12.75	20.39	3.8	0.2	2.71	0	0.22	0.96	0.55	0.12	0.05	0.06
W6b28671|c0_g1_i2	1.23	1.13	1.28	1.5	0.92	1.21	1	0.78	0.72	0.62	1.13	0.9	1.73	1.37	0.66	1.65	0.81	0.07	1.67	2.74	1.69	1.1	2.04	1.07	1.21	1.15	0.94	1.63	1.09	1.94	1.29	1.36	1.58	0.64	1.14	1.74	1.6	1.19	1.45	6.69	1.11	0.66	0.5	0.36	0.87	0.96	1.06	0.98	1.83
W5c26569|c0_g1_i1	0.91	2.31	2.05	0.69	1.09	1.41	0.34	2.52	0.56	0.71	0.47	0.81	1.06	4.36	1.83	1.53	0.79	1.05	1.24	0.65	0.65	2.12	0.33	1.2	5.34	4.3	0.44	0.39	0.42	4.75	5.5	2	2.49	1.28	1.87	13.73	2.11	0.71	0.99	1.76	3.2	2.07	2.35	2.32	3.79	7.99	0	0.64	1.02
W5c30198|c0_g1_i1	0	0.16	0.29	0	3.23	0.74	0	0	0	8.99	0.35	1.56	0	0.15	0	0	0	0	1.43	0	0	0	0	4.14	0	0	0	0	0	0	0	0.3	10	4.13	0.65	1.54	0	3.59	0	0	0	0	0	0	0	0	0	0	0
W6b14545|c0_g1_i1	1.39	0.93	0.92	0.56	0.84	0.93	0.43	1.15	1.06	0.76	1.9	1.02	0.67	0.48	0.38	1.34	0.86	0.22	0	1.72	0.97	0.82	0.73	1.13	0.77	0.41	0.62	0.73	0.64	0.44	1.3	0.75	1.76	0.99	1.45	1.16	1.71	1.52	1.19	0.71	0.46	1.05	1.77	0.39	0.56	0.48	1.1	0.51	0.96
W6b20119|c2_g1_i1	0.14	0	0	0	0.13	0.05	0.14	0	0.14	0	0	0.05	0	0	0	0	0	0.15	0	0	0	0	0	0	0	0	0	0	0	0	0.16	0.02	0	0	0	0	0	0	0	2.22	0	0	0	0	0	0	0	0.08	0
W5c12718|c0_g1_i1	0	2.13	0	0	0	0.43	2.56	0	0	0	0	0.43	0	0	0	0	0	0	0	0	0.15	0	0	0	0	0	0	0	0	0.19	0	0.02	3.29	0	0	0	5.11	0	0	0	0	4.11	0	1.32	0.38	0	0	0.51	0.06
W5c11819|c0_g1_i2	3.29	2.61	2.87	2.7	3.35	2.97	2.67	2.98	3.64	2.28	2.47	2.68	2.16	2.48	1.52	1.12	1.53	3.13	2.88	2.3	2.19	1.47	1.31	2.77	2.56	1.93	2.12	1.44	1.3	2.64	3.71	2.14	4.29	4.1	6.29	3.62	1.96	3.34	2.93	3.37	4.5	6.1	6.76	0.47	4.84	2.71	0.57	1.94	3.32
W5c4346|c0_g2_i1	2.5	0.09	0	1.91	5.37	1.97	1.03	8.24	0.19	33.79	0	7.22	0.08	48.13	0	0.47	0	2.82	1.07	0	0	0	1.25	0.06	1.73	1.16	12.61	0.66	0	0	0.38	3.71	15.71	0	5.31	1.83	0.13	159.4	30.59	0	0.27	0	0.74	0	1.12	34.9	8.05	0	6.08
W1a10913|c0_g1_i1	0	0	0	0	5.94	1.19	0.17	0.28	1.35	0.61	0.71	1.12	7.41	0.15	0	0.16	0	0	0	0	0	0.37	0	0	0	14.53	0.16	0	0	0	0	1.2	0.13	0	3.47	3.12	0	0.3	4.85	0.88	2.22	6.46	0	0	1.06	0.25	3.29	7.84	0
Contig37508	0	0	2.07	3.08	0	1.03	0	0	0	0	109.58	18.26	0	0	33.97	0	0	0	0	0	0	0	0	0	0	0	0	0	0	0	0	1.79	0	0	0	0	0	74.86	0	211.19	0	0	6.83	0	0	0	0	0	0
W6b12636|c0_g1_i3	1.41	0.95	0.25	0.27	4.83	1.54	1.21	1.49	2.49	0.67	2.26	1.46	1.14	1.05	4.02	0.72	0.58	2.59	0.77	9.64	1.09	0.95	0.2	0.98	0.29	0.27	0.81	0.49	0.34	0.44	0.86	1.43	0.41	1.09	1.87	1.01	1.15	0.26	1.29	14.84	0.69	3.16	0.52	0.9	0.3	0.73	0.48	0.76	6.66
W0d30884|c0_g1_i1	0.3	0	0	41.93	0.65	8.58	18.89	0.12	9.5	0.4	0	7.2	25.04	0.67	0	0	0.3	0	0	0	0	0.16	14.39	0	0	2.13	5.5	2.79	0.33	0.46	1.49	2.8	0.7	28.07	9.74	11.99	4.78	18.66	1.49	0.44	1.3	8.41	4.97	0.9	0.16	0	0.19	0.13	0.85
W1a10625|c0_g1_i1	0	0.35	0	1.18	22.98	4.9	0	0	0	7.88	2.67	3.9	17.64	0.16	1.63	0	0	0	0	0.73	3.88	0	0	28.5	0	30.84	0	0	0	0.37	0.3	4.42	0	0	17.6	20.67	0.61	0	18.75	0	73.47	5.37	0.25	0	0	1.23	0	18.41	0
W4a8724|c0_g2_i1	0.98	1.58	1.4	0.14	0.28	0.88	0.33	2.01	2.59	0.73	0.68	1.06	0	3.2	0.44	0.31	0.16	0.51	0.79	0.94	0.27	0.54	0	0	1.77	3.09	0.95	0.14	0	2.33	0.18	0.82	1.28	2	1.42	1.09	0.43	1.89	1.82	0.48	2.12	3.21	1.8	0.39	0.85	0.73	0	0.05	0.16
W1a28464|c0_g2_i1	1.12	0.22	0.19	1.09	1.1	0.74	0.74	1.04	0.51	0.79	0.85	0.87	0.23	2.05	0.53	0.14	0.22	1.46	0.45	0.6	0.43	0.9	0.29	0.35	1.66	1.41	0.36	0.38	0.39	1.59	1.64	0.79	2.15	1.98	3.46	1.05	2.76	2.11	0.74	0.82	1.29	0.73	2.46	0.62	0.62	0.67	0	0.56	0.57
W5c25647|c0_g1_i1	0.4	0.15	0	1.1	0.07	0.34	1.82	0	0.08	0	0.58	0.45	0	0.49	0.14	0.76	0.63	0	1.83	0	0	0	0.54	0	0.11	0	0.15	0	0.53	1.21	0.7	0.37	0.49	0.81	0.38	0	0	0.21	0	2.04	0	0	0	0.09	0	1.06	0.41	0	0.94
W3d16687|c0_g1_i3	4.38	1.45	2.11	0.47	5.24	2.73	2.46	4.38	7.31	1.58	1	3.12	3.82	0.24	1.1	0.66	2.59	1.69	4.48	2.82	6.49	1.65	11.24	1.76	4.84	1.81	7.52	1.04	1.12	1.53	2.71	3.11	1.07	7.97	0.66	4.44	4.36	2.19	2.88	0.2	7.55	6.52	8.29	5.9	0.85	6.54	0.35	2.3	0.86
W6b9521|c0_g1_i1	0.81	0.63	0.28	0.14	0.14	0.4	0	0.53	2.25	0.29	0.34	0.62	2.01	0.43	0.58	0.62	0	1.17	0.39	0.93	0.4	0	0.48	0.19	0.12	0.61	0	0.14	0.24	0.17	0.71	0.48	1.27	0	2.04	0.81	0.43	0.72	0.6	0.96	0	0.68	0.67	0.19	0.17	0.48	0.42	0.95	0.59
W5c4465|c0_g3_i2	0	0.36	0	0.32	1.14	0.37	0.19	0.15	0.19	2.17	0	0.71	0	0	0.17	0	0	0.19	0.91	0	0.15	0.21	0	0	2.98	0.35	3.26	0	0.56	0	0	0.46	9.81	0	0	0.78	1.99	1.33	0.7	0.28	2.03	2.63	0	0	0	0	0.24	0.58	0.06
W5c25516|c0_g1_i1	0	0	0	0	0	0	0	0	0	5.54	0	0.98	0.94	0	0	0	0	0	0	0	0	0	0	0	0	0.29	0	0	0	0	0	0.06	154.72	0	0	0	0.4	0.54	0.56	0	0	0	0	0	0	0	0	0	0
W4a28893|c0_g1_i2	0.38	0.93	0.33	0.33	0.17	0.43	0.38	0.47	0.76	0.34	2.6	0.76	1.49	0.34	0.17	0.37	0.19	0	1.63	0	0.47	0	0.19	0.45	1.94	1.45	0.37	0.16	0	0.39	0.63	0.54	0	0.2	0.37	0.32	1.02	2.39	1.19	0.28	1.87	0.54	1.06	0.46	0	0	0	1.24	0.83
W1a27484|c0_g1_i1	0.48	0	0	10.47	0.7	2.33	44.01	0.13	5.91	0	0	20.68	67.39	0.14	0.14	0	0.32	0	0	0.37	0	0	31.12	0	0	1.07	17.59	1.37	0.48	1.15	5.15	6.65	1.01	101.64	28.78	30.78	7.5	47.74	11.19	0.24	1.75	27.83	8.9	5.03	0.34	0	0.21	0.23	0.91
W6b5290|c0_g2_i2	9.62	1.99	2.46	1.68	1.2	3.39	1.94	2.26	8.5	4.07	2.75	3.37	1.95	3.57	2.05	2.63	2.4	1.65	2.5	14.45	1.78	2.26	2.58	1.87	4.71	3.68	2.32	1.55	2.72	1.87	0.76	3.02	0.45	4.45	8.32	2.19	1.52	3.86	3.26	18.21	2.36	2.89	2.05	1.92	2.03	2.74	3.38	2.95	1.78
W5c19735|c0_g1_i1	1.06	0.15	0.26	0	0	0.29	0.3	0.87	0.15	0.27	0.16	0.29	0	0.54	0	0	0	0.47	0.37	0	0.25	1.49	0	0	0.44	0.57	0	0	0.11	0.15	0.17	0.24	1.53	0	0.44	0.5	0.6	0.54	0.56	0	0	0.42	0.62	0.54	0.31	0.45	0	0.42	0.1
W2b24433|c2_g1_i4	1.1	0	0	0.12	1.08	0.46	0	3.6	1.55	0	0	0.86	0	0	3.7	0	0	0.49	4.1	3.55	0	0	0	0	0	0.09	0	0	0	0	0.1	0.63	0.26	0.1	0.14	0	1.39	2.62	11.02	0	0	0.67	0.59	0.46	0	0	0	0	0
W6b638|c0_g1_i2	0.17	0.87	0.83	0.34	1.43	0.73	0.79	0.51	2.29	0.45	1.24	0.89	0.79	1.31	0.4	0.33	0.9	1.34	1.1	0.65	0.83	0.81	1	0.46	0.49	0.48	0.38	0.91	0.97	0.86	0.5	0.76	0.18	0.98	0.88	1.27	1.05	2.56	0.42	2.79	2.08	0.24	0.78	0.68	0.82	2.28	0.15	1.01	1.14
W2b12362|c0_g1_i2	0.92	0.67	0	0	0	0.32	0	0.66	0	11.16	0	1.97	2.59	0.21	6.78	0.22	0	0	0.7	0	0	0.88	0.45	0.27	0.83	0.11	0.78	0.19	0.43	0	0.25	0.77	0.72	0	0.11	0.19	9.63	1.23	14.67	0	9.35	6.13	0	0	0.6	0.34	0.3	0.03	0
W4a17202|c0_g1_i1	0	0	13.24	0	0	2.65	2.89	0	32.31	0	0	5.87	0.5	0	0	15.61	37.56	0	0	0	0	0	0	0	2.78	0	30.89	0	0	0	0	4.6	15.14	0.22	0.1	34.06	5.83	0	0	0	0	0	24.36	18.88	15.27	0	0	0.36	9.55
W2b24433|c2_g1_i5	0.48	0	0	0.14	0.91	0.31	0	5.3	1.36	0	0	1.11	0	0	3.24	0	0	0.67	4.02	6.3	0.07	0	0	0	0	0	0	0	0	0	0	0.75	0.06	0.41	0.47	0.13	0.86	5.81	11.79	0	0	0.45	0	0.1	0.17	0	0	0	0
Contig30746	0	0	0.83	0	0.24	0.21	0.18	0	0	0	2.87	0.54	0.11	0.61	0	0	0	0.14	0	0.05	0	0	1.12	0.27	0.33	0.17	0.04	0.12	0	0.09	4.99	0.42	0	0.66	0.09	0	0.61	0.37	0.68	9.07	0.5	0	2.08	0.11	0.38	0	0.35	2.85	0.36
W4a10938|c0_g1_i2	0.56	1.26	0.37	0.22	0.81	0.64	0.56	0.77	1.97	0.66	0.19	0.77	0.29	0.78	0.17	0.54	0.43	0.45	0.75	0.5	0.15	0.48	0.24	0.65	2.29	0.88	1.62	0.21	0.51	0.95	1.23	0.69	0.83	1.34	0.72	0.93	0.66	0.66	1.08	0.64	0.81	1.83	0.86	1.79	0.32	0.19	0.4	1.22	0.41
W5c22758|c0_g1_i1	0.51	0	0.15	0	0.3	0.19	0	0.56	0.85	0.15	0.36	0.32	0.27	0.76	0.46	0.33	0.17	0	0.21	0	0.28	0.56	0	0	0	0.49	0.16	0.72	0.13	0	0	0.24	2.27	0.52	0.17	0.57	0.23	0.91	0	0.38	1.48	0	0.24	0.62	0.18	0	0	0.34	0.11
W5c24796|c0_g1_i2	0.64	0.41	1.2	0.55	0.67	0.69	0.51	1.15	1.72	0.68	0.44	0.78	0.49	0.6	0.34	0.61	0.76	0.52	0.46	0.83	0.56	1.16	0.29	0.55	0.4	1	0.53	1.69	0.88	1.21	0.65	0.71	2.19	0.95	1.23	1.2	0.62	1.47	0.52	0.31	0.97	0.95	1.29	0.81	0.31	0.38	0.38	0.88	1.04
W6b8298|c0_g1_i1	0	0	0	0	0	0	0	0	0	1.1	0	0.18	0	0	0	0	0	0	0	0	0	0	0	1.89	0	0	0	0	0	0	0	0.1	3.01	0	0	0	5.77	0	0	52.57	0	0	4.79	0	0	0	0	0	0
W4a16581|c0_g1_i1	0.35	0.34	0	0	0	0.14	0	0.29	0	0.31	0.73	0.22	0.27	0.16	0	0	0	0	0	0	0	0	0	0.61	3.14	0	0	0.15	0	0	0	0.23	0	0	0.84	1.01	0.23	2.01	0.43	0	0	1.46	1.44	0.42	0.18	1.04	0	0	0
W6b12511|c0_g2_i1	0	0	0	0	0	0	0	0	0	0	0.12	0.06	0	0	0	0	0	0.35	0	0	0	0	0	0	0	0	0	0	0	0.69	0	0.05	0	0	0	0	0	0	0	14.88	0	0	0	0	0	0	0	0	0.04
Contig35612	0.31	0.41	0.32	0.19	0.56	0.36	0.67	0.32	0.96	0.49	0.1	0.46	0.34	0.39	0.27	0.24	0.41	0.15	0.51	0.36	0.36	0.6	0.29	0.46	0.25	0.64	0.3	0.45	0.48	0.43	0.74	0.4	0.21	1.39	0.52	0.59	0.42	1.11	0.72	3.36	0.46	0.81	0.78	0.66	0.24	0.68	0.34	0.21	0.31
W4a22243|c0_g1_i8	0.57	0.83	0	0	0.19	0.32	0	0.94	0.56	0.25	0	0.29	0.06	0.06	0	0.14	0.14	0.07	0.26	0.16	0.06	0.47	0.07	0.25	1.03	0.13	0.14	0.36	0.37	0.22	0.24	0.22	1.45	1.17	0.28	0.47	0.19	0	0.53	0	0.15	0	0.49	0.68	0.67	0	0.18	0.02	0.07
W0d11634|c0_g5_i1	8.95	1.5	0.5	7.07	5.43	4.69	1.94	0.16	0.19	12.81	0	3.03	0	0.17	0	0	0	0.4	0	0	0.64	0.21	0	0.23	0.84	0.37	48.82	0.16	18.51	0	0	3.7	0.61	44.37	0	32.09	6.2	38.38	10.6	25.08	0.21	75.58	0	0.7	0.61	1.16	0	29.5	4.06
W6b10930|c0_g2_i2	0.69	6.78	2.95	1.9	0.36	2.54	0.55	1.02	5.17	2.2	0.57	1.88	0.43	2.45	0	1.45	1.37	0.43	0.84	0	1.01	4.98	0.81	2.09	1.99	4.04	1.06	1.05	0.31	2.24	4.54	1.64	2.15	1.97	0	4.58	3.47	2.57	4.26	3.65	1.79	5.98	5.69	3.8	0.14	6.58	6.01	0.31	2.42
W5c6163|c0_g1_i1	0.13	0.13	1.43	0.12	2.9	0.94	0	0.16	2.44	0.18	0.07	0.62	0	0.59	0.18	0	0.07	0	2.59	0.23	0.05	0.37	0	0	0.29	3.6	0.71	0.06	0.4	1.16	0.15	0.55	3.54	3.95	5.04	0.61	0.27	4.08	0	3.48	0	0	0	2.24	0.21	0.2	0	0.24	0
W4a9114|c0_g1_i1	1.59	0.68	1.21	0.61	0.46	0.91	0.53	0.43	1.05	1.41	0.74	0.69	0.55	1.41	1.26	0.51	0.18	0.18	0.86	0.4	0.43	0	0.35	0.21	6.63	1	0.68	0.15	0.13	0.54	0.19	0.82	0.41	1.08	1.03	0.88	0.47	2.35	0.87	1.04	1.15	4.45	2.43	0.21	1.1	2.11	1.36	1.78	0.64
W5c4465|c0_g3_i1	0.19	0	0	0.17	1.86	0.44	0	0	0.19	2.07	0	0.38	0	0.17	0.17	0	0	0	2.12	0	0.16	0.43	0	0	0.14	0	4.87	0.16	0	0	0	0.43	14.55	0	0	0	2.58	1.21	0.24	0.71	1.26	2.18	0	0	0	0.29	0	0.05	0
W5c7352|c1_g2_i5	0.83	0.08	0	0.07	0.22	0.24	0.08	0.07	0.16	0.44	0	0.13	0.32	0	0	0.08	0	0.17	0	0	0.34	0	0.16	0.48	0	0.08	1.84	0.07	0	0.08	0	0.19	9.46	0.08	0.08	0.07	3.19	4.57	0.82	0	0.18	0	0.23	0	0	0.12	0	0	0.03
W5c28977|c1_g2_i1	0.55	0.4	0	0.36	0.24	0.31	0.41	0.11	0.54	0.24	0	0.27	1.17	0.24	0.24	0	0.14	0.28	0.17	0.63	0.11	0	0.4	0	0.1	0.26	0.93	0.23	0.61	0	0	0.29	2.25	0.7	0.4	1.25	0.18	0.97	0.51	0.2	0.15	0.96	0.94	1.81	0.43	0.82	0.53	0.12	0.5
W6b28599|c0_g2_i4	0	1	0	0	0.54	0.31	0.21	0.34	0	0.18	0.32	0.19	0.08	0.92	0	0.1	0	0	0.25	0	0.08	0.11	0	0	0.15	0.88	0	0.09	0.46	0.11	0	0.17	0	0	0.7	0.09	1.37	0.18	0.26	4.86	0.11	0.87	1.14	0	0	0.31	1.19	0.58	0.2
W5c2555|c0_g1_i1	0.12	0.6	0.42	0.53	0.32	0.4	0.74	0.51	0	0	0.52	0.29	0.19	0.33	0	0.12	0.12	0.64	0.15	0	0.2	0.41	0	0.29	0.71	0.35	0.48	0.42	0	0.38	0	0.25	5.5	1.26	0.36	0	1.64	3.07	0.31	0	0.94	1.04	0.51	0.44	0.26	1.11	0.32	0.83	0.29
W4a17672|c0_g1_i5	2.59	0.82	2.38	0.64	1.95	1.68	0.6	2.68	3.86	2.65	0.37	1.85	2.15	2.34	0.7	0.24	0.46	0.37	1.12	0.16	0.41	0.9	0.42	3.07	5.38	3.39	4.62	0.99	1.24	3.29	1.99	1.75	1.05	2.21	1.31	2.87	2.03	5.39	3.03	2.17	4.54	3.38	1.57	6.17	2.51	1.8	1.55	1.01	1.93
W5c10402|c0_g1_i1	4.73	3.61	0.94	2.38	3.26	2.98	3.95	2.53	2.83	4.4	5.73	3.28	2.99	3.04	1.96	1.9	2.19	2.61	3.34	2.27	4.05	1.81	1.4	0.51	1.19	6.97	3.39	4	3.18	2.69	3.63	2.8	7.38	4.05	3.2	1.46	1.17	2.54	5.44	6.23	9.53	4.62	3.49	1.45	0.8	2.96	2.68	8.32	5.17
W4a8088|c0_g2_i1	1.02	0.42	0.87	0	0	0.46	0.15	0.84	1.87	0.39	0	0.54	0.34	0	0.39	0	0	0.3	0.35	0	0.24	1.12	0.28	0.68	1.16	0	0.42	0.49	1.62	0	0.64	0.42	0.34	2.53	1.41	1.21	0.58	1.55	0	0.96	3.78	0	0.4	1.22	0	0.43	0.19	1.39	0.67
W5c6613|c0_g1_i2	0.61	0	0	1.94	3.9	1.29	0.61	0.33	0	2.17	0.64	1.06	0.16	2.54	1.64	0	0	0.42	0.25	3.27	0	0	1	0.48	0.88	2.31	1.57	0.34	0.61	1.04	1.12	0.93	4.61	1.67	4.34	2.03	0.81	1.09	0.5	0.75	3.09	2.28	1.97	0	2.75	2.43	2.36	0.8	0.4
W5c13339|c0_g1_i3	5.22	10.09	5.52	2.43	5.16	5.69	1.1	11.88	29.11	1.34	4.4	8.63	4.68	4.47	4.04	0	2.4	3.52	5.97	1.27	4.03	5.84	4.91	7.99	7.76	5.99	5.81	13.09	0.75	2.05	14.14	5.19	19.77	13.76	11.97	18.56	8.8	6.78	5.1	9.24	21.76	12.53	13.29	16.14	5.43	0.6	9.03	4.02	3.59
W6b7761|c0_g1_i1	0	0	0.15	0	0	0.03	0.18	0	0	0	0	0.03	0	0	0	0	0	0	0	0	0	0	0.17	0	0.19	0	0	0	0	0	0	0.02	0.21	0	0	0	0	0	0	1.96	0	0	0	0	0	0	0	0.05	0.09
W6b19595|c0_g1_i1	0.24	4.92	0	0.31	0	1.09	1.66	0.39	1.05	0.42	0	0.67	0	0	0.11	2.5	0	0	4.74	0	0.19	0	0	0.55	0	0.9	0	0.4	0	7.84	0.26	0.92	0.46	0	0.23	50.66	0	25.03	13.92	17.78	0	0	0	0.57	0.25	0	4.72	20.26	10.87
W5c4334|c1_g1_i2	0	0.14	0	0	0.52	0.13	0	0.61	0.15	0	0	0.13	0.93	0	0	0.14	0	0	0	0	0	0	0	0.35	0.22	0	0.29	0	0	0	0	0.1	2.57	4.29	0	0.37	0.2	0.8	2.96	0.22	0	6.72	0.62	0	0	0.22	0.19	0	0.45
W5c9026|c1_g3_i2	0.22	1.05	0.09	0	0.85	0.44	0.11	0.31	1.18	0.14	0	0.32	1.22	0.34	0.05	0.05	0	0.06	0.13	0	0.09	0.48	0.21	1.08	0.31	0.26	0.31	0.09	0.08	0.06	1.13	0.31	3.01	0.28	1.05	0.63	0.72	2.94	0.13	0.24	1.53	3.42	2.17	0	0	1.05	0	0.44	0.65
Contig29309	2.38	0.07	0	0	1.04	0.7	0	0	0.29	0.6	0.47	0.24	0.35	0.26	0	0	1.26	0.46	0	0.68	0.73	0	0	0.43	0	0	1	0	0.22	0.53	0	0.31	9	24.17	0	0.68	2.86	1.45	9.29	2.9	0	13.45	17.12	3.66	18.49	0	0	7.15	0
W6b22506|c1_g1_i3	2.38	0.42	1.93	0.15	0.9	1.16	0.43	2.73	3.34	1.08	0.09	1.38	0.67	1.77	0.81	1.12	1.34	0.36	1.57	0.4	0.53	1.85	0.34	0.45	0.41	3.89	1.42	0.81	0.67	0.88	0.57	1.04	0.68	2.7	2.18	1.26	2.24	1.57	1.66	3.66	2.06	2.85	1.07	4.1	0.36	0.32	1.56	2.92	2.08
Contig25080	0.41	1.96	0.46	0.35	1.06	0.85	0.94	1	0.8	0.6	0.42	0.82	0.94	0	0.12	1.42	1.08	0.14	0.49	0.77	0	0.74	0.66	0.47	1.27	2.43	1.17	0.34	0	0.83	1.34	0.75	2.64	2.62	1.18	1.24	0.9	3.36	0	1.39	1.32	1.7	0.74	2.11	1.83	0	1.04	1.25	1.92
W1a2982|c0_g1_i2	0	0.26	0	0.24	12	2.5	0	0	0.41	8.5	0.85	2.85	14.19	0	1.34	0	0	0	0	0.63	6.81	0	0	16.59	0	23.37	0	0	0	0	0.75	3.35	0	0	40.85	20.79	0.36	0	9.96	0	58.09	4.02	3.2	0	0	1.63	0	12.46	0
W5c8465|c0_g1_i1	0	0	0	0	0	0	0	0	0	1.13	0	0.19	0	0	0	0	0	0	0	0	0	0	0	0.37	0	0	0	0	0	0	0	0.02	92.13	0	0	0	0.21	0	0	2.56	0	0	1.09	0	0	0	0	0	0
Contig37318	0	0	0	0	0	0	0.24	0	0	0	0.25	0.12	0	0	0	0	0	0	0.57	0	0	0	0	0	0.17	0	0	0.5	0	0	0	0.07	0	0.97	0	0	2.82	0.21	0	5.66	1.02	0	0	0	3.07	0	0.3	0.1	0
W2b24433|c3_g1_i1	0	0	0	0	4.28	0.86	0	30.42	0	0	0	5.07	0	0	4.39	0	0	0.72	38.35	31.42	0	0	0	0	0	0	0.85	0	0	0	0	3.99	0	1.44	2.21	0	10.72	29	105.79	0	0	2.71	5.81	0	0	0	0	0	0
W5c26424|c0_g1_i1	0	0	0	0	0	0	0	0	0	0	0.24	0.04	0	0	0	0	0.12	0	0	0	0	0	0	0	0	0.28	0	0.1	0	0	0	0.03	1.24	7.61	2.33	0	0	2.5	0	2.85	0	0.33	0	0	0	0	0	0	0
W5c28133|c1_g4_i3	0	0	0.15	0	0	0.03	0	0	0	0.32	0	0.05	0	0	0	0.17	0	0	0	0	0.44	0	0	0	0	0	0.17	0	0	0	0.2	0.05	0.56	0	0.35	0.3	0.24	0	0	0	0.39	0.5	0.25	0	0	0	0	0.05	0.24
W5c11220|c0_g2_i8	0.11	0.31	0.14	0.09	0	0.13	0.05	0.22	0.37	0.19	0.11	0.18	0.12	0.09	0.19	0.05	0.05	0	0.19	0	0.43	0.17	0.16	0.25	0.08	0.3	0.51	0.09	0	0.43	0.23	0.18	1.57	0.38	0.72	0.26	0.63	0.61	0.52	0.43	0.4	1.33	0.44	0.63	0.06	0.32	0.2	0.4	0.33
W4a1252|c0_g1_i1	1.54	0.24	0.57	0.52	0.65	0.7	2.92	1	0.05	0.32	0.34	0.98	0.21	0.32	0.54	0.11	0.08	0.48	2.44	1.11	0.74	0.91	0.75	0.03	4.2	0.94	2.07	2.12	0.16	0	1.88	1.01	0.95	1.18	2.24	1.95	0.8	0.24	0.99	0.57	1.73	1.78	0.76	0.46	2.26	1.93	0.21	0.14	1.83
W1a14031|c0_g1_i1	0	0.65	0	0	0.29	0.19	0.34	0	0	0.15	0	0.56	0	0	0.3	0.32	0	0	0	0	0.83	0	0	1.97	0.73	0.64	2.27	0.14	0	0	0.56	0.41	1.05	2.24	0.33	5.61	0	0	0	0.5	1.82	0.47	0.23	0.4	0	0	0	0	0
W6b23619|c0_g1_i1	0	0.12	0	0	0	0.02	0	0	0	0	0.87	0.15	0.19	0	0	1.37	0.24	1.6	0	0	0	0.13	0	0	0	0	0.12	0	0.09	0.12	0	0.2	0	0	0.46	0.1	0	0	0	52.42	0	0	0	0.14	0	0.36	0	0.47	1.11
W4a18033|c0_g1_i1	0.49	0	0	0.64	0.11	0.25	6.14	0	0	0	0.64	1.13	0.38	0	0.11	0	0	0.51	0	0	0	0	0	0.14	25.05	6.64	1.07	0.62	0.55	4.26	0.81	2.11	1.63	11.44	4.29	7.68	0	0.11	0	10.78	5.06	21.9	6.27	1.48	1.54	0.55	0.16	0.48	0
W7b28470|c0_g1_i1	0.37	0.24	0	0	0.11	0.14	0	0.8	0.24	0	0.26	0.22	0	0.22	0.11	0	0	0.13	0.89	0	0	1.88	0	0.29	0.09	0.69	0.24	0.41	0.27	0	0	0.27	0	0.38	0.12	0.61	2.11	0.54	0	0.09	0.27	2.57	0.34	0	3.44	0	1.1	0.07	0.04
W6b4337|c0_g1_i3	0.22	0.58	0.41	0	0.38	0.32	0.17	0.28	0.51	0.42	0.86	0.39	0.2	1	0.04	0.41	0.22	0.45	0.05	0.35	0.6	0.47	0.04	0.81	0.03	1.02	1.17	0.11	0.22	0.66	0.14	0.42	0.27	0.66	1.38	0.58	0.46	1.15	0.48	1.88	0.61	0.73	0.42	1.45	0.76	0.32	0.39	0.12	0.56
W6b12820|c0_g1_i2	1.85	0.14	0	0.12	0.12	0.45	0.14	0.82	0.7	0.13	0.59	0.52	1.1	0.13	0.13	0.14	0.71	0.29	0.52	0.33	0.12	0	0.56	0	3.08	0.4	0.82	1.33	0.11	0.15	3.13	0.69	0.22	1.02	1.1	1.07	2.27	4.55	0	2.72	0.77	2.39	2.55	0.85	3.26	0.43	0.55	1	0.14
W7b2013|c0_g1_i1	0.17	0	0	0	0	0.03	0	0	0	0.35	0.65	0.17	0	0	0	1.41	0	0	1.37	0	0.05	0	0.11	0	0	0	0.16	0	0	0	0	0.16	4.71	0	0.98	0	2.02	0.4	0	0	7.08	0.08	0	0	3.46	0	0	0	0
W5c10227|c0_g1_i1	0	0	0	0	0	0	0	0	0	0.7	0.5	0.2	0	15.51	0	0	0	0	0	0	0	0	0	0	0	0	0	0.13	0	0	0	0.82	61.83	0	0	0	4.42	0	21.16	0	0	2.66	0	0	0.33	0	0	0	0.84
W5c27627|c1_g2_i1	0.69	4.44	2.02	0.99	1.95	2.02	3.16	1.94	3.07	3.32	0.6	2.26	1.92	1.38	0.67	0.99	1.03	4.44	2.72	1.25	1.22	2.15	1.07	3.16	1.99	4.57	7.32	3.7	1.71	1.29	1.77	2.33	8.85	2.59	3.68	2.25	1.15	6.79	3.13	2.5	9.9	4.43	8.88	4.9	2.09	2.32	0.74	1.72	1.87
Contig28449	1.49	1.27	0.91	1.03	0.84	1.11	1.41	1.02	1.63	1.3	0.82	1.21	2	1.26	0.95	1.07	1.38	0.78	1.01	0.49	0.95	0.94	0.79	2.33	2.48	2.01	1.29	0.77	0.6	0.98	1.31	1.23	3.38	2.94	2.3	2.04	0.81	1.98	1.78	1.64	1.75	3.01	3.38	1.33	1.42	1.93	1.79	1.27	1.88
W4a1544|c0_g1_i2	0.27	0.26	0	0	1.98	0.5	0.09	3.06	0	0.81	0	0.69	0.14	0.16	0.89	0.52	0.18	0.09	0.44	0.42	0.6	0.1	1.07	0	8.07	1.2	0.09	0	0.14	0	0.3	0.76	0.85	0	1.76	1.97	0.48	2.18	0.11	0.07	1.38	3.19	0.88	1.74	0.09	0.41	0	0	2.02
W6b4780|c0_g1_i1	0	0	0	0	0	0	0.06	0	0	0.09	0	0.04	0	0	0.11	0	0	0	0.12	0	0	0	0	0	0	0	0	0.05	0.57	0	0	0.05	0.1	0	0.06	0.48	0	0	0.08	7.11	0.07	0	0	0	0	0	3.42	0.06	0
W5c10124|c1_g1_i2	5.52	2.09	1.1	0.26	0.17	1.83	1.18	12.94	3.31	0.88	0.82	3.26	7.41	1.23	5.72	0.28	0.49	0.61	4.3	1.36	0.48	2.38	0.87	1.38	3.2	15.29	0.19	0.83	0.29	2.11	1.73	2.64	34.92	0.3	53.72	6.81	37.14	5.95	0.61	0	28.59	1.1	2.04	4.84	4.51	54.17	1.27	0.99	3.26
W5c4219|c0_g1_i1	0	0	0	0.14	0	0.03	0	0	0	0	0	0	0	0	0	0	0	0	0	0	0	0	0	0	0.12	0	0	0	0	0.16	0	0.01	21.53	0	0	0	0	0	0	0.12	0	0	0	0	0	0	0	0	0
W6b2046|c0_g1_i1	0	0	0	0	0	0	0	0	0	0	0	0	0	0	0	0	0	0	0	0	0	0	0	0	0	0	0	0	0	0	0	0	0	0	0	0	0	0	0	16.22	0	0	0	0	0	0	0	0	0
Contig33559	0	0	0	0	0	0	0	0	0	0	0	0	0	0	0	0	0	0	0	0	0	0	0	0	0	0	0	0	0	0	0	0	0	0	0	0	0	0	0	2.61	0	0	0	0	0	0	0	0	0
W6b30315|c0_g1_i1	0	0	0	0	0	0	0	0	0	0	0	0	0	0	0	0	0	0	0	0	0	0	0	0	0	0	0	0	0	0	0	0	0	0.62	0	0	0	0	0	4.84	0.22	0	0	0	0.1	0	0	0	0
W6b20906|c0_g1_i1	0	0.13	0	0	0	0.03	0	0	0	0.12	0	0.02	0	0	0	0	0	0.14	0.08	0.16	0.22	0	0	0	0	0.26	0	0	0	0.14	0	0.05	0	0	0	0.11	0.54	0.12	0.17	3.19	0.15	0	0	0.16	0.14	0.4	0	0	0
W6b24665|c0_g1_i1	0	0.2	0	0	0	0.04	0	0.17	0	0	0	0.03	0	0.18	0	0	0	0	0	0	0.17	0.67	0	0	0	0	0.2	0	0	0.21	0	0.07	0	1.67	0	0	0	0	0.5	2.25	0	0.29	0.28	0	0	0	0	0.06	0.13
W5c13149|c0_g1_i2	0	0	0	0	0	0	0	0	0	0	0	0	0	0	0	0	0	0	0	0	0	0	0	0	0	0	0	0	0	0.4	0	0.02	14.99	0	0	0	0	0	0	0	0	0	0	0	0	0	0	0	0
W5c7737|c0_g1_i1	0	0	0	0	0	0	0	0	0	0	0	0	0	0	0	0	0	0	0	0	0	0	0	0	0	0	0	0	0	0.11	0	0.01	1.45	0	0	0	0	0	0	0	0	0	0	0	0	0	0	0	0
Contig18697	0.81	0.11	0	0.2	0.61	0.35	0.46	0.67	0.11	0	0.12	0.31	0.72	1.14	0.1	0.11	0	0.12	0.28	0.13	0.67	0	0.91	0	0.67	1.1	0	0.29	0	0.47	1.02	0.41	0.73	0.36	2.25	1.16	1.39	2.99	0.57	0.68	0.38	1.3	1.28	1.25	1.33	0.69	0.15	0.36	0.23
W6b22152|c1_g1_i1	0	0	0	0	0	0	0	0	0	0	0	0	0.29	0	0.33	0	0	0	0	0	0	0	0	0	0	0	0	0	0	0	0	0.03	0	0	0.36	0	0	0	0	2.75	0	0	0	0	0	0	0	0	0
W6b18710|c0_g1_i1	0	0	0	0	0	0	0.08	0	0	0	0	0.01	0	0	0	0.16	0	0	0	0	0.13	0	0.28	0	0.06	0	0	0.07	0.06	0	0.09	0.04	0.13	0.08	0.12	0.03	0	0	0	8.57	0	0	0	0	0.08	0	0.1	0.01	0.05
W6b29431|c0_g1_i1	0	0	0	0	0	0	0	0	0	0	0	0	0	0	0	0	0	0	0	0	0	0	0	0	0.24	0	0	0	0	0.17	0	0.02	0	0	0.16	0.14	0	0	0	1.5	0.37	0	0	0.2	0	0	0	0	0
W5c23492|c0_g4_i1	0	0	0.48	0	0	0.1	0	0.23	0.27	0	0.14	0.11	0.11	0	0	0	0.14	0	0	0	0.34	0	0.14	0.16	0.1	0.52	0.27	0.94	0.51	0	0.3	0.19	5.3	0.14	0.67	0.46	0.18	0	0	0.1	0.3	0.97	0.76	0.17	0	0.21	0	0.5	0.32
W5c8057|c0_g1_i1	0.32	1.09	0.55	1.39	1.54	0.98	0.96	2.64	1.43	0.57	0.34	1.07	1.12	1.29	0.14	0.15	0.96	2.48	0.19	0.74	1.84	1.06	0.94	2.07	1.97	2.58	1.7	2.18	1.79	0.49	0	1.25	4.01	4.43	1.87	1.74	0.85	1.71	1.59	1.06	1.57	3.15	3.32	1.54	0.33	1.68	0.62	1.76	2.08
W6b13222|c0_g1_i1	0.6	0	0	0.17	0.17	0.19	0	0	0	0.71	0	0.12	3.27	0.36	0	0	0	0	0	2.3	0	0.22	0	0.7	0	0.19	0	0	0.3	0	0	0.39	0.31	2.05	0	0.17	2.4	0	0	14.47	6.3	0	0	1.2	0	0	0.26	3.48	0
W5c4502|c1_g1_i1	0	0	0	0	0.44	0.09	0	0	0.17	0	0	0.03	0	0	0	0	0	0	0	0	0	0	0.49	0.98	3.51	0	0.32	0	0	0	0	0.28	4.45	2.91	0.97	0	0	0	0	0	0.73	2.58	2.31	0.2	1.22	1.75	0	0.47	0.06
W5c28678|c0_g1_i9	0	1.14	0.28	0.4	0.46	0.45	0.2	0.32	0.52	0.52	0.07	0.33	0.1	0.93	0.06	0.5	0.52	0.47	0.32	0	0.37	1.15	0.19	0.76	1.46	0.99	0.57	0.89	0.34	0.33	0.72	0.56	3.12	2.21	1.27	1.74	0.52	2.15	1.78	1.25	1.63	0.92	1.89	0	0	1.27	1.01	0.51	0.48
W5c5280|c0_g1_i1	0	0	0	0	0	0	0	0	0	0	0	0	0	0	0	0	0	0	0	0	0	0	0	0	0.14	0	0	0	0	0	0	0.01	6.38	0	0	0	0	0	0	0	0	0	0	0	0	0.6	0	0	0
W5c1056|c0_g1_i1	5.1	0.09	0	0.16	0	1.07	0	0	4.49	0	0.68	0.89	0.07	0.5	0	1.95	1.39	0	4.28	1.06	1.59	0.1	0	0.22	0.54	0	0	1.57	0	0.47	0	0.72	5.94	4.36	1.08	5.63	2.46	0	0.23	0.07	8.63	7.28	0	0	0.48	0	0	0.26	1.47
W5c8579|c0_g2_i1	0.17	0	0.07	0.07	0.15	0.09	0.08	0.14	0	0	0	0.05	0	0	0	0	0	0.35	0	0.48	0.21	0	0	0	0.06	0.08	0.41	0.07	0.06	0	0.19	0.1	3.28	0.52	0.33	0.07	0.22	0.3	0.83	0.37	0	0.35	0.35	0.2	0.26	0.38	0.11	0.09	0.28
W5c171|c0_g1_i1	9.93	0	0	0.72	0	2.13	0	0	0	1.91	0	1.78	0	2.95	0.15	4.6	2.14	0.34	7.03	0.38	0.95	10.53	0	0	0	0.31	0	0.7	0	2.36	0	1.71	9.18	3.38	0	0	25.05	3.09	0	0.12	17.74	24.35	0.23	0.2	0.86	0	0	0.09	0.38
Contig43283	0.14	0	0	0	0.19	0.07	0	0	0	0	0.22	0.05	0	0	0	0	0	0.66	1.21	0	0	0	0	1.84	0	0	0	0	0	0	0.24	0.21	1.84	4.53	0	9.34	0.19	0.13	0	0	0	0.2	6.7	0.86	2.45	0	0	0.04	0
Contig28156	0	0	0	0	0	0	0	0	0	0	0	0	0.03	0	0	0	0	0	0	0	0	0	0.06	0	0	0.06	0.28	0	0	0	0	0.02	4.39	0.07	0.06	0	0	0.06	0	0	0.04	2.29	0	0	0	0	0.08	0.15	0
W5c693|c0_g1_i5	0.63	0.2	0.27	0.36	0.46	0.38	0.31	0.69	0.1	0	0.66	0.39	0.08	0.28	0.56	0	0	0.54	0.13	0.12	0.77	0.23	0.31	0.12	0.23	0.69	3.94	0.09	0.31	0.75	0.69	0.52	4.99	2.46	0.51	0.35	0.42	4.65	0.26	2.31	0	0	3.32	2.01	0.54	0.31	2.42	0.53	0.52
W5c5056|c0_g2_i1	0	0.3	0	0	0	0.06	0	0.13	0	0	0.16	0.05	0	0	0	1.47	0	0	0	0	0.25	0.17	0	0	0	0	0	0	0.34	0	0.34	0.13	33.78	0	2.67	0.51	6.9	0	9.84	0	0	0	10.33	1.83	0.48	0	0	0	0
W5c18946|c0_g2_i1	0	0	0	0	0.3	0.06	0	0.14	0	0	0	0.02	0	0	0	0	0	0	0.21	0	0	0	0	0.41	0	0	0	0.15	0.39	0	0	0.06	3.68	0	0.17	0	0.7	0.31	0	0	0.95	0	0.48	0	0.36	0	0	0.2	0
W5c16920|c0_g1_i1	0	0.26	0	0.47	0.23	0.19	0	0	0.13	0	0.84	0.16	0.21	0	0	0.78	0.54	0	0	0	0	0	0	0	0.19	1.28	0	0.68	0.2	0	0.44	0.23	1.58	10.33	3	0.22	0	4.19	0.33	2.08	0	0.38	0	0	0	0.4	0	0	0.09
Contig34555	0.16	0	0.07	0	0.07	0.06	0	0	0	0	0.16	0.03	0.37	0	0	0	0.16	0	0	0	0	0	0	0	0	1.19	0	0.13	0.06	0	0.09	0.1	1.23	6.68	2.74	0.13	0	4.12	0	3.3	0	0	0	0	0	0	0	0	0
W1a21040|c0_g2_i1	0	0	0.08	0	0	0.02	0	0	1.68	0	0	1.33	10.19	0.16	0	0.09	0	0	0	0	0.51	0	0	0	0.19	3.55	0.34	0	0.07	0	12.97	1.48	0.56	0.18	10.12	0	0.12	0	23.1	0	5.61	8.39	0	0	0	0.27	0	0	0
W1a3052|c0_g1_i1	0.37	0	0	0.16	0.16	0.14	0.37	0	2.6	0	0	4.42	0	0.67	6.53	6.29	0	0	3.19	0	0	0.21	0	0	0.41	0	17.72	0	22.14	0.38	0	3.03	10.98	0.57	0.36	0.78	1.49	0.17	19.26	1.52	0.41	3.42	4.65	0	0	0	0	2.21	0
W4a16181|c0_g1_i3	0.93	0.76	0.84	0.69	1.33	0.91	2.95	0.87	2.81	0.63	0.48	1.42	2.16	0.74	0.57	0.7	0.87	0.82	0.9	0.77	0.58	0.94	0.67	4.13	3.96	2.2	1.68	1.66	0.43	0.78	2.1	1.4	0.79	0.76	2.36	1.25	0.96	2.23	3.03	1.59	1.33	1.16	1.2	0.94	0.64	0.68	0.6	1.09	1.72
W5c28282|c0_g1_i1	8.46	0.35	0	1.04	0.14	2	0.16	1.03	0.36	8.74	27.46	7.26	18.48	20.24	9.38	7.36	0	1.88	2.92	3.78	2.52	0	0.1	0.18	0.83	23.48	0.15	2.21	6.52	0.05	2.07	5.38	6.16	0.69	0.15	1.39	4.86	3.62	11.7	9.92	4.58	10.91	7.2	1.38	12.07	1.48	0	3.86	4.64
Contig15984	0	0	0	0	0	0	2.84	0	0	0	0.25	0.64	0.18	0	0	0	0	0	1.15	0	0	0	3.71	0.55	1.71	1.23	0	0	1.76	0	0	0.54	0.19	0.97	0.23	1.18	3.31	0.21	0.59	0.52	0	0.33	0	0	0.25	0	0	0	0.55
W6b7372|c0_g1_i2	0	0	0	0	0	0	0	0	0	0	0.34	0.08	0	0.29	0	0.16	0	0	0.79	0	0.4	0	0.16	0	0	0	0	0.27	0	0	0	0.11	0	0	0	0.14	0	0	0.2	3.22	0	0	0.22	0	0	0	0	0.05	0.21
W6b10108|c0_g2_i12	0.21	0.08	0.65	0.29	1.54	0.56	0.55	0.35	0.71	0.82	1.45	0.87	0.95	0.45	0.38	0.77	0.29	0.22	4.55	0.29	0.07	1.02	1.73	0.05	0.61	1.36	0.37	2.46	1.47	1.42	0.83	1.01	1.22	0.47	0.2	1.3	0.62	1.5	2.03	6.85	2.37	0.77	0.23	0.56	1.36	0.06	0	1.45	1.03
W5c23630|c0_g1_i3	0.74	1.14	0.63	0	0.77	0.66	1.77	0.85	1.9	0.66	0.15	0.94	1.26	1.05	0.92	2.69	1.18	1.22	1.97	1.19	0.36	0.81	0.14	1.04	0.11	0.14	0.14	1	0.99	0.75	0.81	0.94	4.27	1.36	1.15	0.61	1.57	1.71	0.18	0.98	0.96	0.21	0.81	0.89	0.61	0.66	0.38	1.12	0.1
W6b25148|c0_g1_i8	0	0.12	0.53	0.53	0	0.24	0.49	0	0.24	1.31	5	1.18	1.15	0.22	0.77	0.83	0	1.01	4.48	3.53	0.81	0	0	0.14	0.71	2.1	0.47	0.73	0.18	0.75	0	0.94	0.29	0.63	0.72	0.41	1.8	2.73	0.91	13.4	0.8	0.52	0.51	0.44	0.38	0.18	0.79	0.07	0.61
Contig28153	0	0	0	0	0	0	0	1.21	0	0	0	0.2	0	0	0.13	0.14	0	0	0	0.67	0.48	0	0	0	0	0.14	1.28	0	0.11	0.3	0	0.17	8.96	0.3	0	0	0	0	0	0	0	0	0.2	0	0	0	0	0.16	0
W5c14493|c0_g1_i1	309.22	0	159.05	1.9	144.1	122.86	123.01	491.89	72.54	668.1	903.32	376.53	1942.17	260	240.2	1334.1	85.93	926.03	315.15	2473.74	263.39	5.58	473.21	134.07	183.44	0.26	0	3781.64	478.73	0	2334.78	801.71	1294.75	622.21	1247.82	709.55	241.76	1452.55	609.31	2824.5	1191.47	68.91	109.41	53.02	159.3	1.03	1156.31	39.77	68.75
Contig9674	0	0	0	0	0	0	13.59	0	0	0	0	2.37	11	0	3.84	7	0	11.51	0	0	0	0	0	0	0.21	0	0	6.06	0	0	0	2.09	0	9.66	3.75	0	1.33	0	9.4	0	11.79	0	4.15	3.09	2.53	0	4.6	0	0
Contig31867	2.8	0.09	0.54	0.81	0	0.85	2.9	0.29	1.77	3.03	1.35	1.59	1.7	0.03	2.05	0.05	0.6	5.23	0.19	0.78	0.9	13.32	0.28	5.32	4.31	0.12	0.16	1.69	2.31	0.22	7.49	2.46	0	0.7	0.29	5.68	5.75	1.33	1.63	12.49	0.04	4.36	4.56	0.34	0.29	1.39	1.23	0.01	5.95
W2b24503|c0_g3_i1	0.82	0.34	0.1	0.2	1.23	0.54	0	0.19	48.47	1.68	0	8.97	2.47	0.31	46.17	0.45	0.47	0	1.14	48.23	1.64	0.78	0.12	2.34	2.13	1.23	4.66	3.29	0.52	8.52	4.79	6.8	3.86	1.93	3.88	154.12	4.85	8.58	17.05	0.43	1.28	2.81	3.41	2.26	0.61	0.7	1.66	0.4	1.68
W2b26892|c0_g1_i1	0	0	0	0	0	0	1.86	2.29	0	0	0	0.69	0	0	1.45	0	0	0	0.56	0	0.57	1.53	0	0	0.34	0	0	0	0	24.54	0	1.53	0	0.24	0	2.03	19.15	0	1.87	0	0	0.33	0	0	0.61	0	0	0.36	0.23
W4a19728|c0_g2_i1	1.99	0	0.24	0	4.46	1.34	0.57	0	31.26	0.51	24.79	9.62	6.52	1.14	0.25	0.27	2.13	2.35	4.15	6.21	13.05	1.25	1.25	0	14.08	1.62	23.75	4.34	0.11	0.58	12.84	5.05	3.11	8.44	6.21	8.29	11.72	5.56	0	1.78	12.95	7.58	0.39	0.68	0.74	9.79	1.28	14.83	1.13
W3d4694|c0_g1_i5	0.81	0.34	0.26	0.5	0.57	0.5	0.23	0.83	1.48	0.79	0.55	0.73	0.57	1.06	0.54	0.7	0.98	0.34	0.52	0.7	0.64	0.5	1.51	0.71	0.42	0.81	0.88	0.6	0.47	0.72	0.75	0.71	0.36	1.35	1.1	1.24	0.57	1.12	0.81	0.86	0.69	0.5	1.15	0.97	0.34	0.61	0.36	0.55	0.78
W6b23164|c0_g1_i7	0.38	0.41	0.38	0.18	0.18	0.31	0.85	0.57	1.07	0.68	0.2	0.6	0.69	0.8	0.23	0.49	0.71	0.15	0.63	0.35	0.66	0.49	0.4	0.46	0.6	1.08	0.73	0.56	0.4	0.66	0.78	0.57	0.38	0.94	0.91	0.65	0.55	0.8	0.49	3.19	0.5	0.96	0.52	1.06	0.38	0.66	0.37	0.35	0.34
W6b11131|c0_g1_i4	0.42	0	0.52	0	0.12	0.21	0.28	1.4	0	1.01	0.59	0.67	0.6	0	0.47	0.61	0.56	0.44	0.52	0.45	0.52	0.04	0.1	7.78	0.05	0.54	0	1.29	0.34	2.96	0.12	0.92	6.14	0.43	0.07	0	0.24	0	0.04	12.15	0.19	0	4.54	1.44	0.63	0.05	1.32	0.1	0.06
W6b14239|c1_g1_i6	0.24	0.13	0.33	0.18	0.3	0.24	0.62	0.51	0.85	0.61	0.29	0.56	0.29	0.65	0.31	1.13	0.48	0.25	0.63	0.48	0.74	0.42	0.37	1.05	1.27	0.72	0.47	0.5	0.21	0.28	0.57	0.57	0.46	1.38	0.9	0.69	0.28	0.89	0.56	1.55	0.22	0.97	1.1	0.5	0.5	0.36	0.44	0.32	0.47
W5c27600|c0_g1_i1	0.24	0	0	0.07	0	0.06	0	6.16	0.32	0	0.42	1.15	0	0	0	0	0	0	0.19	0	0	0	0	0	2.36	0	0	0.61	4.8	0	0.61	0.45	28.34	5.05	0.08	0	0	0	12.04	0	0	0	24.07	0	0	0	0	0	0
Contig25968	2.7	4.25	1.19	4.88	6.39	3.88	1.54	15.86	15.74	6.66	1.69	7.4	1.62	5.16	4.55	2.44	0.85	2.47	16.97	0.27	4.99	1.19	1.89	11.29	8.25	2.19	23.09	8.83	10.27	3.23	5.18	6.04	32.93	10.66	16.16	10.03	3.69	6.17	2.01	2.33	17.82	5.95	9.16	8.61	13.74	7.73	7.05	13.63	5.07
W6b26809|c1_g1_i2	0.06	0	0.25	0.05	0	0.07	0	0.15	2.97	0.05	0.06	0.54	0.05	0.26	0.32	0	0	0.06	0.21	0.2	0	0.06	0	0.69	0	0.67	0.51	0.05	0	0.24	0.06	0.18	0.18	1.56	0.63	0.78	0	0.37	0.58	4.12	0	0.58	0.41	0.14	0.25	0.18	0	0.15	0
W5c15898|c0_g1_i2	0	0.28	0	0	0	0.06	0	0.24	2.02	0.13	0	0.4	0.11	0	0	0.42	0	0	0	0.34	0.12	0.16	0	0.34	0.21	1.11	0.28	0	0.87	0.6	0.32	0.26	3.77	1.19	0	0.36	0	4.93	0	0.86	0	0	0.2	0.18	0.3	0	0	0.53	0
W5c24192|c0_g1_i2	0.56	0.54	0.6	0.85	1.47	0.81	0.7	8.19	0	1.12	1.91	2.06	0.65	1.38	1.25	0.54	2.1	0.29	4.78	0.32	0.57	0.31	4.12	1.81	3.04	1.06	0.95	0.83	1.15	0.14	0.93	1.38	6.48	1.58	4.63	1.29	0	3.62	0	0.83	5.94	9.45	4.26	2.86	1.46	0.42	0.9	0.79	0.98
W6b14128|c0_g1_i1	0	0	0	0	0	0	0	0.95	0	0	0	0.23	0.6	0	0	0	0	0	0	0	0.32	0	0.57	0	0	0	0	0.66	0.29	1.38	0	0.2	0	0	0	0.64	0.26	0.34	0	1.57	14.67	0	1.07	0	0.4	0	0	1.63	0
W5c26932|c0_g1_i1	0	0	0.81	0.68	0	0.3	0	1.16	3.74	0	0.82	0.95	0.37	0.28	0	0	0	0.65	0	0.36	1.16	0.17	0	0	2.05	1.94	0.91	0.27	0.47	0.64	3.64	0.68	3.94	0.97	0.61	0.13	4.39	2.8	1.56	0.23	0.51	3.09	0.22	0.19	0.16	0.47	0.41	0.53	0.16
W7b22673|c0_g1_i1	0.39	0.93	0.17	0.67	0	0.43	1.16	0.48	2.68	1.38	0.81	1.08	0.3	0.69	0.69	1.11	0	0	3.05	0	0.32	0.85	0	1.81	0	1.47	2.61	0	0.29	2.96	3.41	1.03	1.36	4.95	5.44	0.48	3.6	1.38	0.48	0	4.82	10.85	1.6	0	6.44	1.16	7.46	0.54	0.51
W6b4902|c0_g1_i2	0.39	0.31	0.08	0.48	0.2	0.29	0.42	0.24	0.26	1.39	0.44	0.54	0.33	0.14	0	0.25	0.06	1.17	0.2	0.48	0.48	0.36	0.45	0.8	0.66	0.92	0.63	0.41	0.36	0.23	0.43	0.44	0.28	0.9	0.57	1.14	0.73	0.55	1.37	2.56	0.39	0.91	1.03	0.74	0.88	0.34	0.54	0.35	0.33
Contig5635	1.8	0.19	0.43	0.09	1.4	0.78	0.9	0.91	1.29	1.78	1.88	1.16	1.48	2.32	0	1.44	0.5	0.21	1.58	0.58	1.23	0.55	0.2	1.76	0.72	1.52	0.19	1.53	0.37	2.76	1.32	1.07	0.63	2.36	2.53	1.75	1.2	1.6	0	1.77	2.5	0.84	1.66	1.68	0.21	1.05	0	0.84	0.9
W5c14657|c0_g1_i1	13.27	13.08	9.94	11.43	11.56	11.85	18.27	22.36	10.2	25.34	10.31	16.21	12.35	16.2	14.63	11.76	17.54	11.28	12.96	7.04	13.58	15.66	9.52	11.56	30	14.36	24.93	17.94	13.55	12.02	15.64	14.87	34.64	10.59	17.41	17.3	19.3	20.33	13.02	19.38	12.94	16.45	14.65	17.37	20.08	14.3	11.68	13.73	7.95
W6b2455|c0_g1_i1	0.25	0.48	0.32	0.21	0	0.25	0	0.81	10.42	0.33	1.29	2.14	0.19	3.09	0.44	0.48	0	0.77	0.75	0.71	0.71	0	0.24	0.14	0.09	1.76	3.35	0.21	1.2	0	0.27	0.76	0.68	0.38	0.36	0.62	0.82	2.42	0.61	29.11	2.42	1.04	0.34	0	0.77	0	3.03	0.66	0.33
W3d9019|c0_g1_i1	0	0	0	0	0.1	0.02	0	12.04	0.12	0.95	0	2.18	0	0	0	0	0	0.49	0	0	1.74	0.26	3.82	0.41	1.54	1.23	0.34	0.2	0.18	0	0	0.54	11.08	0.48	0.34	1.18	0.63	1.68	0.73	0.09	3.2	0	1.47	0.57	0.12	0.18	0.61	0.23	0.16
W3d13080|c2_g2_i1	0	0.49	41.07	0	0.22	8.36	10.74	45	6.38	0	0	10.35	18.76	0.11	0	14.31	6.43	0	0	0.29	0	28.19	8.67	3.85	0	0.24	0.73	0	2.91	0.77	62.09	7.76	75.71	0.13	0.12	0.11	4.37	66.09	29.75	57.58	0.96	0.53	0	0	0.4	0	0	59.77	0.04
Contig35105	0.13	0	0	0	0.8	0.19	1.83	0.54	0	0	0	0.46	0	0	0.7	0.13	0	0	0.48	0	0	0	0.26	0	1.98	0.12	0.13	0	2.43	0	0.72	0.37	0.1	0.53	0	0.11	0.17	0.12	2.91	4.04	0.71	0	0.18	0	0	0.2	0	2.45	0.26
W6b18888|c0_g1_i1	0	0.49	0	0.3	0.15	0.19	0.34	0.84	0	0.91	0.53	0.5	0	0.76	0.46	0.16	0	0.35	1.04	0	0.84	0	0	0.4	0	1.29	0.16	0.72	0.13	0.35	0.19	0.36	0.53	0	0.5	1.7	0.45	0.91	0.63	0.88	0.55	1.2	0.47	0.41	0.18	0.76	0.22	0.53	0.28
W6b12511|c0_g1_i1	0	0	0	0	0	0	1.3	0	0	0.23	0	0.32	0.07	0	0	0	0.09	2.51	0	0	0	0	0	0	0	0	0	0	0	0.44	0	0.16	0	0	0	0	0	0	0.22	30.78	0	0	0	0	0	0	0.22	0	0.69
W6b1799|c0_g1_i1	0	0.39	0.35	0	0.09	0.17	0	0.33	9.54	0.72	0	1.84	0.16	0.81	0	0	0.1	0	1.48	0.12	0.42	0.22	0.1	0.83	0.73	0.67	0.1	0.69	0	1.66	0.22	0.44	0.08	2.91	0.98	1.69	1.21	0.63	0.88	38.49	0	0.14	0.84	0.61	0.11	1.67	0.13	0.4	0
W6b10049|c0_g1_i6	0.11	0.1	0	0.09	0.18	0.1	0.84	0.17	0.31	0.19	0.22	0.34	0.41	0	0.09	0.1	0.16	0.11	0.06	0.36	0.22	0	0.41	0.12	0.04	0.3	0.25	0.04	0.12	0.22	0.23	0.17	0.12	0.54	0.36	0.13	0	0.47	0.59	2.88	0.29	0.37	0.87	0.19	0.16	0.16	0.2	0.1	0.25
W5c19099|c0_g1_i5	0	0	0	0	0	0	0.63	0.13	1.55	1.12	0	0.79	0.37	0.14	0	1.35	0	0	0	0	0.13	0.17	1.07	0	0.45	0.3	1.97	0.4	0.35	0.32	0.86	0.41	22.91	0.32	0.3	0.65	0.42	9.75	0.19	0.12	0	1.1	4.32	0.19	0.16	0.23	0	0.04	0.16
Contig12239	0	0	0.05	0	0	0.01	2.45	0	0	0	0	0.41	0.17	0	0	0	0	0	0	0	0	0	6.74	0	0	0	0	0	0	0.05	0	0.37	6.38	0	0	0	0.21	0	0	0	0.12	0	2.72	0	0	0	0	0	3.47
W5c11229|c0_g1_i1	0.21	0.18	0.2	0.23	1.01	0.37	0.5	0.5	1.57	0.49	0.44	0.65	0.49	0.38	0.47	0.38	0.37	0.3	0.29	0.43	0.32	0.44	0.21	0.74	0.42	1.03	0.66	0.45	0.33	0.76	0.73	0.48	3.7	1.08	0.72	0.73	0.14	0.73	0.75	0.55	0.69	0.41	0.88	0.73	0.41	0.75	0.54	0.46	0.89
W5c2673|c0_g4_i1	0.23	0.05	2.32	0.05	0	0.53	0.06	0.83	0.45	0	1.41	0.6	1.92	0	0.2	0.43	0.34	0.12	16.7	0.06	0.05	22.46	0.22	0.26	0.08	0.11	5.76	0.1	0.17	0	0.12	2.58	23.86	0.23	3.88	0.66	0.15	0.05	0.35	0	0	8.38	0	0.68	0	0	0.29	1.03	0.07
W5c13258|c0_g1_i1	0	0	0	1.09	0	0.22	0	3.87	1.56	0	0	0.93	0.61	1.54	2.25	0.45	0	0	1.34	2.16	1.54	0	18	2.21	0.34	2.38	1.06	0.13	2.57	0.48	5.36	2.23	17.68	1.12	0.91	1.44	3.76	7.68	0.97	1.74	0.17	0.22	0	0.57	0	0.7	1.41	0.26	0.1
W6b2231|c0_g1_i1	1.3	0	0	0	0	0.26	0.72	1.19	0	0	0	0.37	0.45	2.06	0.13	0.42	0.43	0	1.23	0.66	0.59	0	0.14	0	0	0	0	1.84	0.22	0.3	0.48	0.47	0.45	0.44	0.14	0.48	0.38	1.03	1.43	2.03	0	0	0	0.35	0	0	0.74	0.2	0.38
Contig17778	0	0	0.34	0	0	0.07	0.39	0.48	0.58	0.7	0	0.36	0.3	1.05	0.35	1.5	0	0.4	0	0	0.64	0	0.38	0	1.7	0	24.93	0	0	0	0	1.65	0.31	0	0.95	4.4	1.04	0.87	0.48	0.86	0.42	0	0	0.47	0.41	0	0	0.11	0.26
W4a8670|c0_g1_i1	0.12	0	0.05	0.1	0.31	0.12	0.12	0.98	0.53	0.21	0.12	0.37	0	0.64	0.05	0.23	0.24	0.06	0.8	0.14	0.39	1.9	0.41	0	1.77	4.24	1.15	0.4	0	0	1.84	0.75	1.31	0.85	1.1	2.09	1.11	1.33	0.44	0.79	0.71	0.17	0.16	0	0.5	1.61	0.31	0.99	0
W1a30363|c0_g1_i1	0	0	0	0.84	0	0.17	0.65	0.67	0	0	0	0.45	0.5	0.29	0.43	0.31	0	1.34	7.68	0	0.13	0.18	0	0.76	0.23	9.52	4.38	8.93	0.12	0.17	1.61	1.92	1.14	1.16	6.91	0.41	0	1.73	0	0	1.05	2.96	0	0.19	0	0.48	0	0	0.11
Contig14051	0	0.45	0.82	0.03	0.4	0.34	0	0	0	0.09	0	1.36	0.15	0.12	0	0.22	1.87	0	0	3.96	0	0.9	128.01	0.08	0.14	1.56	0.13	0	0.1	2.95	0.07	7.38	0	0	3	0	10.05	0.41	0.12	0	0.04	0	11.66	0.16	0.21	0	0.25	0.55	0.23
W4a7458|c0_g2_i4	0.57	0.18	0	0	0.16	0.18	0.06	0.15	1.18	0.45	0.13	0.36	0.1	0.45	0.11	0	0	0	3.35	0	0.31	1.38	0.06	0.22	7.84	2.73	4.85	0.11	0.28	0.32	0.41	1.19	0.2	1.8	0.61	0.47	0.5	5.13	0.62	0.51	2.79	0.97	1.04	0.6	0.46	0.66	0.16	0.42	0.27
W6b4450|c0_g5_i1	0	0.49	0	0	0	0.1	0	0.21	4.91	0	0	0.85	0.59	1.36	0	0.73	0	0	0.31	0	0.42	0.42	0	0	1.75	56.73	2.46	8.94	0.76	3.37	0.7	4.13	0	48.79	5.43	0	2.54	0	0	12.74	0.55	10.35	0.53	3.51	0.53	0	0	18.33	0.08
Contig13147	0.14	0	0	0	0.25	0.08	0	0.29	0.35	0.19	0	0.14	0.72	0.64	0.13	0.14	0	0	0.87	0.16	0.06	0.08	1.19	0	0.46	0.27	0.28	0.06	0.21	0	0.08	0.28	0.45	0	0.62	1.07	0.28	0.51	0.44	0.21	0.23	0.1	0.99	0.09	0.07	0.21	0.18	0.16	0.17
W3d14710|c0_g1_i2	1.8	0	0	0	0.08	0.38	0.09	1.55	0.19	0.42	1.28	0.61	2.35	0.34	0.25	0.18	0	0.19	0.11	0.33	0.08	0	20.72	0.88	0.55	0.27	0.91	1.68	0.56	0	0.52	1.58	0.44	7.54	0.37	0.31	1.63	3.44	5.97	0.97	0	0	0.26	0.11	0	0	0.36	0.11	0.69
Contig20417	1.33	0.63	0.62	0.1	0.16	0.57	1.38	0.8	0.67	1.2	0.81	0.92	1.53	2.05	0.11	0.77	0.35	0.28	1.55	1.06	0.51	1.37	1.25	2.77	0.68	1.82	4.03	0.34	3.22	0.5	0.46	1.3	4.77	20.92	1.06	1.05	0.74	1.82	1.35	7.3	0.15	0.12	0.09	5.51	2.26	1.18	0.84	1.67	0.24
Contig8719	2.16	0.1	0.27	0.37	0	0.58	2.53	0.12	0.93	1.61	1.09	1.09	1.76	0.01	3.26	0.03	0.74	4.67	0.1	0.41	1.09	10.99	0.13	6.75	5.03	0.27	0.09	1.89	1.95	0.32	7.75	2.49	0	0.45	0.13	4.29	6.48	2.05	2.12	12.22	0	4.19	5.43	0.19	0.43	1.69	0.97	0.01	6.56
Contig27343	0	0.16	0.14	0.33	0.19	0.16	0.27	0.68	0	0.05	1.09	0.38	3.66	0.15	0.29	1.79	0.38	0.57	2	0.69	1.3	0.12	0.54	0.26	0	0.47	0.48	0.14	0.08	0.34	0.06	0.7	7.62	0.22	1.49	0	1.38	0.05	2.65	1.09	0.06	0	0	0.79	0.17	0.08	0.21	0.55	0.44
W4a23701|c1_g2_i1	0.28	1.22	0.96	0.24	0.49	0.64	0.14	1.72	1.94	0.37	0.88	0.92	0.65	1.25	0.25	0.67	3.35	0.87	1.53	1.12	0.69	2.3	0.96	0.49	2.63	1.72	0.67	2.01	0.31	1.14	1.23	1.25	1.75	1.43	1.9	1.28	1.49	1.86	1.04	2.68	2.42	1.37	1.16	2.52	1.31	1.25	0.18	1.29	0.65
W1a25764|c0_g1_i4	0	0	0	2.06	0	0.41	0	0	10.52	0	0	2.17	2.13	33.47	0	1.41	0.18	0	0	0	0	0	0	3.43	0.26	39.73	0.18	2.48	0	0	8.87	4.85	0.14	0	3.73	0.31	4.63	19.54	2.04	1.62	0.4	21.84	0	0	0	0	0.71	0.05	1.82
Contig26784	0.39	0.48	0	0.09	0	0.19	0	0.65	2.05	0.88	0.51	0.68	5.04	0.26	0.79	0.66	3.04	0.3	0.96	0	0.08	1.19	2.22	1.5	0.14	1.77	0.95	0.08	0.07	0.3	0	1.02	2.54	50.24	0.67	0.66	0	1.49	1.22	0	0.11	0.14	0	19.96	0.1	0	0	0.11	0.39
W6b23667|c0_g1_i1	0.29	0	0	0	0	0.06	2.07	0	0.07	0	0.97	0.56	0.83	1.21	0.26	0	0.36	2.8	0.35	0.33	0.47	1.18	0.21	0.17	0	0.88	0.96	0	1.27	0.58	1.96	0.73	0	0.66	0.69	0.24	0.47	5.07	0.18	5.36	3.25	0.2	0.1	1.54	0	0	0	0.08	4.19
W7b18832|c0_g1_i10	1.68	0	0	0	0.12	0.36	0.42	0.69	1.38	0.87	0	0.61	0.76	1.5	2	0.13	0.28	1.59	0.17	0.96	0.69	0.15	0.14	5.56	0.91	0.66	0.81	0.71	0.42	0	1.23	0.98	0	1.29	0.68	0.47	1.11	1.99	0.87	0.93	0.61	3.92	0.77	0.84	2.04	0	0.72	0.51	1.58
W6b6106|c0_g3_i1	0	0	0	0	0	0	0	0.11	0	0.35	0.14	0.17	2.04	1.64	0	0.25	0.92	0	0	0.15	0.11	0	0	0.15	0	0	0.76	2.34	0	0	0.14	0.45	1.13	0	0.89	0.66	0	0.23	0.98	3.68	0	0	0	0	1.23	1.38	0	0	0
W6b31281|c0_g1_i1	0.97	0	0	0	0	0.19	1.93	0.13	0	0.29	0.34	0.53	0.25	1.29	0	1.39	0.48	0.17	0.39	5.19	0.92	1.06	0	0.38	0.35	0.31	1.09	3.01	0.24	0.82	2.13	1.02	0.13	1.16	1.56	0.4	0.86	0	1.2	1.78	1.57	0.45	1.11	0.19	0.34	0.97	0.41	0.36	0.11
W1a15419|c0_g1_i1	3.53	0	0	0.34	0	0.77	0	1.94	0	6.29	0.41	2.58	4.72	86.76	0.18	22.59	0.2	24.49	16.92	30.64	0	6.47	0	0	0.57	3.53	0.76	0.5	6.71	1	11.88	11.47	16.87	2.01	5.52	8.99	25.82	3.49	12.64	2.89	4.68	3.85	23.55	10.6	2.25	4.7	0	0	50.76
Contig25833	1.21	1.13	0.42	0.66	8.69	2.42	2.47	2.44	0.36	8.19	15.28	4.92	9.41	4.76	7.98	5.47	1.57	2.59	22.09	11.7	4.78	0.35	4.57	8.2	7.59	22.49	1.99	1.33	18.32	3.25	3.02	7.45	32.07	4.23	15.24	3.82	0.95	9.26	5.17	8.93	16.64	6.87	1.55	2.37	0.65	1.21	39.55	14.32	0.83
W4a31830|c3_g2_i1	0	0	0	0	0.32	0.06	0.73	0	2.28	0.22	0	0.54	0.28	1.84	0	0.23	0.12	0	1.33	0.28	0.7	0.4	0.59	0.71	4.12	0.92	1.17	1.85	1.35	0.62	0.27	0.88	0.95	1.12	1.18	0.51	1.77	0.97	2.86	0.54	0.92	0.51	2.01	0.87	0.76	0.54	0	0.58	0.52
W6b8382|c0_g1_i1	0	0	0	0	0.33	0.07	0	0	0	0.17	0	0.09	0	0	0.17	0	0	0	0	0	0.92	0	0	0.22	0.27	0	0	0.32	0.28	0	0	0.11	0	0.38	0	0	0	0.5	0	1.24	0	0	0	0.22	0.78	0	0	0	0
W6b10900|c0_g1_i1	0	0	0	0	0	0	0	0	0.2	0	0	0.03	0.31	0	0.18	0.19	0	0.21	0	0	0	0	0	0	0	0	0	0	0	0	0	0.05	0	0	0	0	0	0	0	1.55	0	0	0	0	0	0	0	0.06	0
W5c31306|c0_g1_i1	1.05	1.52	1.05	1.21	1.37	1.24	1.57	0.58	2.77	1.71	1.46	1.5	2.99	2.81	1.09	5.04	0.7	0.36	2.34	1.41	0.72	1.54	1.88	2.66	1.26	1.33	0.34	0.89	1.82	0.71	0.58	1.6	3.15	1.25	0.85	0.87	0.93	2.8	5.85	3.09	1.33	0.74	3.38	0.21	0.91	1.05	0.68	1.77	2.44
W2b9191|c0_g1_i1	0	0	0	0	0.17	0.03	0	0	0	0.44	0.41	0.14	0	0	4.65	0	0	0	0	0	0	0.22	0	0	0	0	0	0	0	0	0	0.26	0.92	2.11	0	0	2.09	0	0	0	0	0	0	0	0	0	0	0	0
W4a9690|c0_g1_i1	0	0.13	0	0	0.49	0.12	0	0.46	0.28	0.25	0	0.21	0	0.12	0.25	0	0	0.29	0	0	0	0	0.14	0.65	1.01	0	0.27	0.12	0	1.42	0	0.22	0	0.29	0.14	0.12	0.37	0.12	0.35	0.21	1.81	0.2	0.38	0.33	0	0	0	0	0.09
W6b10048|c1_g2_i1	0	0	0	0	0	0	0.3	0	0	0	0	0.05	0	0	0.13	0	0.3	0	0	0	0	0	0	0	0.22	0	0	0.26	0	0	0	0.05	0.12	0	0	0	0	0	0	1.89	0	0	0	0	0	0	0	0	0
W5c26366|c0_g1_i1	92.72	0	0	0.28	59.05	30.41	9.86	24.98	25.93	17.99	10.8	14.93	18.83	84.6	0	14.43	18.38	9.34	66.78	27.66	73.23	0.89	0	25.73	6.31	0	0	44.11	98.92	0	29.91	27.32	13.27	76.92	15.36	31.79	2.36	20.7	116.54	44.2	17.7	22	18.29	0	0.17	0	9.98	25.29	0.05
W2b11857|c0_g1_i4	2.5	1.28	2.01	1.5	2.13	1.88	0.66	2.55	2.02	2.27	2.07	1.96	1.78	3.72	6.46	0.93	1.52	2.2	1.67	2.86	2.33	1.73	0.75	3.46	1.07	1.64	1.92	1.25	1.48	1.82	1.06	2.09	1.59	2.03	3.46	1.53	2.77	2.17	1.7	1.28	1.99	1.86	2.18	1.28	0.9	1.52	0.85	2.83	1.59
W4a32308|c1_g1_i1	1098.4	0	60.37	18.55	522.81	340.03	164.52	228.15	17.95	149.07	84.59	108.68	95.77	841.94	106.76	54.99	12.33	83.5	868.44	159.8	898.41	18.32	215.08	576	153.51	0	0	178.5	1199.45	0	136.55	294.7	54.02	218.07	67.19	280.04	11.96	72.37	1560.16	110.02	99.94	23.57	218.96	22.53	37.3	10.24	58.06	223.99	25.67
W6b25282|c0_g1_i3	1.71	0.67	0.73	0.5	2.09	1.14	1.2	1.76	1.01	1.09	1.01	1.15	0.95	1.95	1.07	1.24	0.71	1.33	1.6	1.48	0.49	0.91	0.77	1.76	1.28	1.25	1.31	0.88	0.77	1.25	1.6	1.19	0.85	1.49	1.01	0.94	0.92	2.32	0.97	3.47	0.68	2.01	1.56	1.75	1.11	1	1.6	1.08	0.69
Contig23637	0	0	0	0	0.13	0.03	0	0	0.36	0	0	0.06	0	0	0	0	0	0.15	0.26	0	0	0	0	0.08	0.05	0.07	0	16.84	0	0	0	0.92	9.29	0	0	2.04	0	0	0	8.97	0	0	0	1.73	0	0	0	0	0
W3d26209|c0_g1_i1	0	0	0	0	0	0	0	0	0	0	0	0	0	0	0	0	0.36	0	0	1.78	0	0	10.08	0	0	0	0.09	0	0	0	0.7	0.68	0	0	11.57	0	0	0	0	0	61.22	0	0	0	0	0	0	0	0
W4a22124|c0_g1_i1	2.35	0.47	0.12	0.36	1.2	0.9	0.35	1.65	0.68	0.49	0.65	0.86	1.23	1.6	0.68	1.33	0	0.43	1.34	0	2.43	0	0.41	0.89	3.25	2.09	1.93	1.87	0.46	0.42	0	1.07	1.03	4.6	1.34	0.81	3.12	0.8	0.68	0.25	0.97	1.74	3.53	0	0.79	2.69	0.89	0.41	0.69
W6b15356|c0_g1_i1	0	0	0	0	0	0	0	0	0	0	0	0	0	0	0	0	0	0	0	0	0	0	0.05	0.13	0	0	0.31	0	0.16	0	0	0.03	0	0	0	0	0	0	0	2.16	0	0	0.3	0	0	0	0	0.03	0
W5c23226|c1_g1_i1	0.51	0.33	0.29	0	0	0.23	0.34	0.14	0	1.06	0	0.26	0	0	0	0	0	0.53	0.21	0	0	1.31	1	0.8	1.23	1.94	0	0	0	0	0.94	0.42	2	0.35	0.66	0.85	1.82	0.46	1.27	0.63	2.78	0.24	0.47	0	0.36	0	0.22	0.77	0.11
Contig33218	0.24	0	0.1	0.21	0.1	0.13	0.36	0	0.24	0.21	0.12	0.16	0.37	0.53	0.53	0.11	0.12	0	1.01	0.27	0.1	0.13	0	0	0.09	0.23	0	0.1	0.09	0	0.39	0.21	0.93	0	0.35	0.1	0.63	0	0.89	1.58	0.13	0	0	0	0.75	0.18	0	0.27	0.08
W6b5107|c0_g1_i1	0	0.3	0.13	0	0	0.09	0.15	0.64	0	0	0	0.13	0.36	0	0	0.3	0.31	0	0	0	0.13	1.19	0.3	0	0.11	0	0.3	0	0.23	0.47	0	0.19	0	0.16	0.15	0.13	0	0.41	0	1.94	0.17	1.09	1.71	0.19	0	0	0	0.48	0.1
W4a21472|c0_g1_i2	0.12	0	0	0.2	0.41	0.15	0	0	0	0.11	0.62	0.22	0.09	0.21	0	0	0.12	0	2.73	0	0.1	0	1.39	0	2.13	0.11	0.46	0.2	0	0	0.78	0.44	2.58	0.48	0.46	0	0	0.21	1.32	0.17	0	8.28	0	0.28	0	0	0	0.7	0
W5c3237|c0_g1_i1	0	0	0	0	0	0	0	0	0	0.28	0.11	0.06	0	0	0	1.5	0	0	2.53	0	0.09	0	0.31	0	0	0	0.1	0	0	0	0	0.24	4.71	0	0.91	0	2.35	0	0	0	6.2	0	0	0	1.62	0	0	0	0
W7b13982|c0_g1_i1	0.51	0.49	0.55	0.22	0.11	0.37	0.38	0.42	1.13	0.34	0	0.47	1.87	0.68	0.23	0.37	0.25	0.39	0	0.15	0.21	0	0.37	1.49	1.1	1.2	1.47	0.54	1.04	0.26	2.93	0.77	0.89	0.91	1.72	2.33	0.34	2.48	0.63	0.47	1.1	2.49	1.93	1.37	3.17	0.95	1.47	0.14	0.55
W5c26917|c1_g1_i2	0	0	0	0	0	0	0	0	0	0	0	0	0	0	0	0	0	0	0.66	0.07	0.03	0	0.16	0.86	0.67	0.18	0	0.3	0.67	0	0.28	0.2	4.88	0.33	0.96	0.35	0.77	0.4	0.12	0	0.03	0	1.02	0.04	0.07	0	0	0	0.13
W6b17960|c0_g1_i1	0	0.2	0.09	0	0	0.06	0	0.34	0	0	0	0.06	0	0	0	0	0	0	0	0	0.33	0	0.4	0	0.15	0.29	0	0.26	0.15	0.21	0	0.09	0.16	0	0	0.09	0	0.18	0	3.23	0	0	0	0	0	0	0	0.17	0
W6b28078|c0_g6_i1	0.35	0	0.8	0	0.2	0.27	0	0.77	0.12	0	0.73	0.27	0.18	0.21	0.73	0	0	0	0.28	0	0	3.47	0.23	0	0.59	3.33	0.45	1.09	0.09	0	1.03	0.62	0	0.24	0.79	0.1	1.24	1.56	2.32	8.8	2.66	0.33	0.48	0	0.37	0.18	0.15	0.39	0.12
W5c26917|c1_g1_i3	0	0	0	0.03	0.03	0.01	0	0	0.07	0	0.04	0.02	0	0	0.06	0	0	0.04	0.29	0.12	0.11	0.04	0.34	0.44	0.45	0.2	0	0.29	0.62	0	0.19	0.17	4.73	0.35	1.11	0.14	0.83	0.68	0.21	0	0	0.1	1.81	0.04	0.07	0	0	0	0.31
Contig23998	0	0	0	0	0	0	0	0	0	0.62	0.94	0.26	0	0	0	1.58	0	0	20.41	0.15	0.15	0	0.73	0.03	0.04	0	0	0.02	0	0	0.03	1.22	7.47	0	4.9	0	0.07	0.35	0	0	8.95	0	0	0	6.07	0	0	0	0
W5c11881|c0_g1_i1	1.02	0	0	0	0	0.2	0.76	0.21	0	0.34	1.99	0.66	1.48	9.39	0.23	0	0	0	0	0	1.04	0	0	6.09	0.28	0.36	0.25	0.22	8.77	0	0.42	1.5	22.72	0	0.86	9.52	0	3.61	0.16	0.19	0	0.36	0	0	0.13	0	0	5.73	0
W5c20041|c0_g1_i1	0	0	0.54	0.11	0.22	0.17	0	0.1	0	0	1.05	0.3	0.29	0	0	2.3	0	0	0	0.29	0	0	0.37	0	0.36	0.6	0.24	0.53	1.69	0	4.03	0.56	4.74	0.52	0	0.21	1.51	0	0	0	1.23	0.53	0.52	0	0.26	0.38	0	0	0.17
W5c7111|c0_g1_i1	0	0	0	0	0	0	0	0	0	0.98	0.21	0.2	0	0	0.05	2.16	0	0	17.24	0.03	0.16	0	0.58	0.03	0.08	0	0	0.07	0	0	0.28	1.09	9.64	0	4.42	0	0.15	0.23	0	0	7.42	0	0	0	4.31	0	0	0	0
W2b11524|c1_g2_i7	0.15	0	0	0.13	0.52	0.16	0	0.12	2.23	0.54	0.31	0.53	0.23	0.4	38.82	0	0	0	0.18	1.55	0.25	1.16	0	0.18	0.11	0.28	0	0.25	10.61	1.23	0	2.91	0	0.15	10.64	16.4	9.19	8.02	0	0	0.16	0	0	0.9	2.35	0	0	0.17	0
W4a11901|c0_g1_i3	0.67	0.56	0.49	0.44	0.68	0.57	1.06	0.47	0.8	0.58	0.8	0.68	0.83	1.44	0.32	0.46	0.67	0.46	0.66	0.76	0.61	0.52	0.56	0.89	2.69	0.74	0.88	0.61	0.77	0.76	0.88	0.82	0.7	1.11	1.06	1.36	0.43	1.96	1.06	1.12	0.65	1.2	1.22	1.36	0.63	0.89	0.45	0.43	0.88
W4a3298|c0_g1_i1	0	0.38	0	0.34	0.68	0.28	0.58	0.8	1.16	0.69	0	0.54	1.36	1.04	0.17	0.75	0	0.6	0.47	0.22	0.96	0	1.15	0.46	2.26	1.66	0.38	0.5	0.44	1.19	0.43	0.74	0.76	0.4	0.95	2.28	1.04	87.05	0.48	0	0	3.01	0	0	0.41	0.58	0	0.44	0.65
W5c14386|c0_g1_i1	1.04	0	0.15	0	0.6	0.36	0.17	0.28	1.63	0.69	0.09	0.51	0.47	0.54	0.15	0.08	0.17	0.27	1.05	0	1.14	1.05	0	1.32	0.13	0.74	1.09	0.44	1.22	1.33	0.67	0.62	2.57	0.53	1.18	1.08	0.46	1.85	1.07	0.19	1.13	1.58	1.79	1.04	0.54	0.52	0	0.73	0.34
W5c27487|c0_g1_i1	0	0	0	0	0	0	0	0	0.19	0	0	0.03	0.15	0	0	0	0	0	0	0	0.32	0	0	0	0.57	0	0	0	0	0	0	0.05	3.67	0	0.57	0	0	0	0	0	0	0	0	0	0	0	0	0.05	0
Contig22704	0	0	0.27	0.27	0.41	0.19	0	1.03	0.93	0.14	0.33	0.4	0.97	0.42	0	0.15	0	0.81	0.76	0.36	0.13	0.17	0	0	1.24	1.48	0	0.66	0.46	0.16	0.34	0.43	0.61	0.48	2.73	0.78	0	0.69	1.36	0.23	2.88	0.66	1.08	0.19	0.49	0.94	0.2	0.35	0.16
W6b30090|c0_g1_i7	0.58	0.75	0	0.08	0.76	0.44	0.29	0.72	3.57	0.35	0.2	0.86	0.53	0.87	0.26	0.19	0.1	0	0.83	0.22	0.56	1.07	0.19	2.28	2.11	1.48	1.32	0.83	0.72	0.6	0.75	0.78	2.06	2.39	0.66	1.95	0.26	2.16	1.81	1.44	1.27	2.32	2.28	0.58	1.42	0.58	1.38	0.76	0.55
W4a976|c0_g1_i1	0	0	0	0	0.29	0.06	0.34	0	0.33	0.3	0	0.16	0	0.15	0.15	0	0	0	0.41	0	0	0	0	0.2	2.69	0	0	0	0	0	1.12	0.25	0.4	0	1.31	2.4	0	2.1	0	0.12	0	0.71	0.47	0.41	0	0	0	0.66	0.06
W5c22588|c0_g2_i1	0.12	0	0	0	0	0.02	0	2.85	0.12	0	0	0.5	0.1	0.11	0	0.12	0	0	5.42	0	0.2	0	1.46	0.29	0.18	0.35	0	0.21	0.18	0.25	0	0.47	14.13	36.23	0.24	0	13.33	0	0	0.09	0.13	0.17	0	0.15	0.9	1.3	0.32	0.03	2.92
W5c27627|c1_g2_i2	0.53	2.57	1.02	0.15	1.13	1.08	1.3	1.12	3.98	1.16	0.86	1.51	0.87	1.16	0.53	0.74	1.06	3.84	1.36	1.09	0.87	0.58	0.98	1.59	1.03	2.35	3.71	1.4	1.19	1.27	1.24	1.41	8.82	2.3	1.6	1.13	0.63	5.31	1.68	1.92	7.82	1.49	4.48	1.63	2.71	0.44	0.38	1.46	0.76
W4a15238|c0_g1_i1	0.66	2.98	0.57	0	1.73	1.19	1.21	1.72	2.18	0.69	0.69	1.32	1.71	1.77	1.67	1.16	1.65	1.82	2.01	1.27	0.9	1.82	0	2.32	4.14	1.25	3.62	0.65	0.74	4.39	2.18	1.85	1.72	0.68	0.32	0.46	0.73	0.78	1.64	1.38	2.39	0	0.61	0.79	1.26	1.65	1.13	1.92	1.06
W4a27453|c0_g1_i1	0	0	0	0	0	0	0.15	0	0	0.14	0	0.05	0.24	0	0	0	0	0	0	0	0	0	0	0	2.3	0	0	0	0	0	0	0.13	0	0	0	0	0	0	0	0	0	0	0	0	0	0	0	0	0
W7b5414|c0_g1_i1	0.17	0.38	0.14	0	0	0.14	0.22	0.09	6.26	0	0.12	1.12	0	0.1	0	6.01	1.22	0	0.54	0	0	2.5	0.43	1.36	0.28	0.63	0.27	0.09	0.78	3.62	0.37	0.96	0	0	0.22	0.05	0.15	0	0	0.78	0	0	0.15	0	2.83	0	0.86	6.19	0.96
W4a25828|c0_g1_i1	0.14	0	0	0	0	0.03	0	0	2.56	0	0	0.43	0.45	0	0	0	0.14	0	0	0	0	0	0	0	6.53	0	0	0	39.24	0	0	2.44	0	0	0	0.24	0	0	0	0	0	0.6	0	0.34	0	8.58	0	0	0
W4a7093|c0_g1_i1	0.29	0	0.17	0	0.34	0.16	0	0.32	0.19	0.17	0.51	0.27	0.15	0.7	0	0.09	0	0.3	0.47	0	0.24	0	0.19	0.91	0.78	0.65	0.28	0.08	0.87	0.2	0.32	0.33	0.23	0.6	0.09	0.57	0.26	0.35	0	0	0	0	0	0.23	0.61	0.29	0.63	0.25	0.23
Contig20282	1.18	0.54	0.83	1.02	0.54	0.82	0.35	1.03	1.51	0.68	2.1	1.19	1.35	1.18	1.36	1.07	1.52	0.43	0.93	1.27	1.14	0.61	2.11	0.65	1.65	1.64	2.08	1.35	0.98	1.63	1.15	1.27	0.98	0.71	0.81	1.45	0.65	1.3	0.43	0.82	0.3	0.88	0.38	1	1.45	0.52	2.05	2.04	2.65
W2b24424|c0_g1_i5	1.96	0	0.1	0.2	1.81	0.81	0.46	7.67	0.34	0.51	1.08	1.68	0.89	0.62	23.68	0.22	8.85	0.36	0.84	16.67	13.12	0	0.11	0	0.42	0.44	0.11	0.49	17.56	0	0	4.44	0.09	0.47	0.11	0	0.46	7.37	0	0.25	7.74	0	0.16	3.73	0.12	10	14.82	0.52	0.15
W1a14337|c0_g1_i5	0.34	0.59	0.75	0.82	0.88	0.68	0	0.61	0.87	0.54	0.49	2.46	0.26	1.08	7.59	4.46	1.41	1.32	0.57	1.32	4.53	1.41	0.13	2.68	1.12	0.7	8.78	2.51	4.26	2.54	0.15	2.47	3.53	2.83	2.09	0.11	1.97	0	1.34	0.35	0.29	0.09	0.28	0.81	0.77	1.41	0.43	1.7	1.39
W3d31106|c0_g1_i1	0	0	0.46	0	0	0.09	0	0	0.71	0.32	0	0.17	0.28	0	0	0	0	1.29	0	0.41	0.15	0	2.98	0	0.39	0	0.35	1.21	0	1.28	0	0.44	0.28	0	0.17	0.3	0.24	0	0	0.53	0	0	0	0	1.49	0	0.46	0.35	0.41
W2b10653|c0_g2_i4	0	0.33	0.1	0.3	0.6	0.27	0.17	0.8	0.17	1.28	0.54	0.5	0.18	8.9	7.08	2.09	1.77	1.84	1.26	4.88	1.69	0.13	1.63	1.61	0.29	0.11	0.22	0.15	0.85	0.12	1.07	1.89	0.49	0.06	0.28	0.14	0.08	0.05	0.5	0.51	0.12	1.77	0.48	7.37	4.6	0.43	0.07	3.15	0.17
W4a31800|c0_g1_i1	0	0	0	0	0	0	0	0	0	0	0	0.07	0	0	0	0.18	0	0	0	0	0	0	0	0	2.22	0.18	0	0	0.14	0.39	0.84	0.21	0	0	0	0	0	0.68	0	0	0	0	0	0.46	0.8	0	0	0	0
W7b10570|c0_g1_i1	0	0	0	0	0	0	0	7.18	0	0	0	1.2	0	0	0	0	0	5.48	0	0	0	0	0	0	0	0	60.35	0	526.94	0	0	31.2	0	18.89	0	0	0	0	0	0	0	0	0	0	247.76	0	0	0	0
W5c29294|c1_g1_i1	0	0.19	0	0	0	0.04	0.78	0.16	0	0	0.81	0.33	2.42	1.39	0.35	0.37	0	0.2	1.89	0.45	2.71	0	0	0.23	0	0	0.56	0.33	0	1.39	0	0.65	1.82	0	0	0.81	0	0.17	0	0	0	0	0.27	0	0	0	1.25	0.87	0.13
Contig34058	0.57	0.31	0	0	0.07	0.19	0.16	0.27	11.85	0.29	1.35	2.32	0	5.84	0.72	2.02	0.16	0	0	0.37	3.05	2.58	12.98	2.18	0.47	4.67	9.83	0.14	2.94	2.23	4.36	2.87	0.25	0.66	0.31	0.2	0	1.01	0.4	4.47	1.05	1.59	0	0	1.01	2.42	1.35	2.56	8.53
Contig38715	1.7	0.75	0.73	0.55	0.62	0.87	0	35.83	0.14	0.44	0.59	6.2	0.55	6.42	0.25	0.54	2.11	12.46	0.51	0.32	0.69	0.39	1.11	1.57	0.77	8.9	36.76	6.82	35.61	0.29	0.16	6.12	0.39	38.24	0.21	12.77	0.28	1.51	0.79	0.47	1	0.2	0	9.41	39.58	6.02	0	0.65	0.26
W0d10042|c0_g3_i1	0.37	0	0.16	1.94	0	0.49	0	1.53	0.74	0.5	0.39	0.53	0.58	1	0.33	1.43	0.37	0.19	0	1.93	0.31	1.02	0.36	0.44	1.08	0.53	0.72	0.47	0.28	1.33	0.41	0.67	1.02	0.38	0.18	0.31	0.74	0.5	0.46	0.41	0.81	0.26	0.51	0	0.78	0.84	0.24	0.89	0.43
W7b15446|c0_g1_i3	0.14	0	0.12	0	0.24	0.1	0.55	0	0.95	0.24	0.29	0.34	0.21	2.45	0	4.21	1.09	0	1	1.89	0.22	0.3	0	0	0	1.95	1.06	0.7	1.43	0.28	2.27	1	0	0	0.4	0.57	0	0.85	0.17	0	0.59	1.15	0	0.16	5	0	0.18	1	3.05
W1a7091|c0_g1_i1	0.69	1.09	1.23	1.08	0.76	0.97	1.37	0.51	0.74	0.89	1.82	1.52	4.26	3.28	3.79	2.93	2.36	0.51	3.33	1.93	2.04	1.3	2.57	4.45	1.13	2.25	4.88	4.33	1.58	2.16	1.44	2.66	3.41	0.57	1.27	1.3	1.24	1.89	1.85	0.69	0.61	0.53	0.95	0.9	2.27	3.27	3.93	3.99	5.94
W4a19973|c0_g1_i1	0	0	0	0	0	0	0	0.2	0.32	0	0	0.09	0	0	0	0	0	0	0	0	0.13	0	0.16	0	8.15	0	0	0	0	0	0.09	0.45	0.13	0.42	0.24	0	0	0	0	0	0	0	0	0.05	0	0.12	0.11	0	0.05
W4a19369|c0_g1_i2	0.06	0.06	0.16	0	0.37	0.13	0.18	0.75	0	0.32	1.71	0.58	1.74	4.01	0.22	1.69	0.3	0.5	1.33	0.07	0.1	0.4	0.36	3.48	1.18	0.4	3.28	0.15	0.81	1.55	1.6	1.22	0.28	0.12	0.06	1.01	0.56	0.22	0.08	0.81	0.79	0.6	0.08	6.63	0.13	5.45	1.25	4.44	0.4
W1a23883|c0_g1_i2	3.09	1.81	3.07	1.15	1.93	2.21	0.92	2.09	1.38	3.23	1.08	4.43	1.61	1.85	1.35	4.73	3.26	0.56	3.71	5.12	5.12	4.21	2.43	6.39	5.22	3.92	3.84	5.56	1.37	13.15	4.76	4.11	2.83	3.43	2.82	5.56	3.47	1.81	3.48	1.5	1.87	3.04	3.24	2.92	6.88	8.93	4.38	3.73	4.57
W4a431|c0_g1_i1	0	0.12	0	0	0.22	0.07	0	0.51	1.98	0.33	0.78	0.6	1.16	3.12	0	0.12	0	0	1.82	0.14	1.13	0.27	0.49	0.59	3.43	25.81	81.58	0.53	0.65	0	0.83	6.4	0.2	0.51	0.61	2.4	0.83	1.11	0.77	0.18	0.27	0.35	0.69	0.6	0.26	1.12	82.48	0.39	0.17
W3d11683|c0_g2_i1	0	0	0	0	0.6	0.12	0	1.26	0	0.61	1.07	0.49	1.73	0	0.31	0.66	0	0	0.83	0	0	0.75	3.85	7.8	0	0.32	12.54	1.16	0.76	0.52	0.38	1.66	0	0	1.49	0.28	0.23	0	1.69	0	0	0.72	0.71	0	0.36	0.26	0.66	1.39	10.03
W5c3418|c0_g1_i1	1.08	2.51	0.43	0.25	0.13	0.88	0.58	1.54	4.49	0.64	0.45	1.37	1.45	2.25	0.45	0.62	1.36	0.52	1.57	1.24	0.83	1.03	1.06	2.44	1.61	1.98	2.71	1.28	1.28	2.5	1.43	1.45	1.24	1.4	0.91	0.6	1.15	1.22	0.53	0.53	1.4	0.91	1.89	1.55	0.52	2.05	0.83	3.75	1.46
W6b19116|c0_g1_i1	0.29	0.28	0	0	0	0.12	0	0	0.44	3.93	0	0.73	4	0.13	0	0.42	2.79	8.66	0	1.69	0	0	0	0	0	0.84	2.42	0	0.77	0.45	0.65	1.2	0	0	0	0.98	0.59	1.05	0	4.23	0.32	0	0.81	0	1.07	8.81	1.14	0	0
W7b26485|c0_g1_i5	0.1	0.1	0.09	0.09	0.59	0.2	1.72	0.39	0	0.7	0.82	0.65	5.02	4.41	1.26	0.7	2.81	0.91	0.13	1.97	0.47	0.69	0.41	4.39	0.49	0.2	0.2	2.12	1.94	0.05	0.34	1.5	0.04	0.11	0	1.56	0.14	0.74	2	0.88	0.62	2.78	0.07	3.38	5.48	0.31	0.47	1.36	1.05
Contig13461	0.48	0.33	0.09	0.44	0.2	0.31	1.37	0.8	0.29	0.36	0.18	0.65	0.33	0.66	0.75	1.6	0.74	0.07	0.77	1.38	0.86	0.99	3.55	1.33	0.52	0.44	0.98	1.07	1.13	1.91	1.9	1.1	0.66	0.93	0.57	0.86	0.84	0.58	0.52	1.64	0.3	0.24	0.49	0.81	1.12	2.71	1.84	1.15	0.93
Contig592	1.35	0.85	0.78	2.07	0.88	1.19	1.64	1.43	2.21	0.99	1.25	1.39	1.55	1.2	0.49	1.64	2.31	1.98	1.23	1.1	1.53	1.08	1.65	1.43	1.28	1.11	2.96	1.03	1.37	1.38	1.09	1.44	1.28	1.43	1.41	1.08	1.97	1.13	1.51	0.48	0.93	1.31	1.51	0.87	1.3	1.52	1.7	1.41	1.4
W4a26604|c0_g1_i1	2.35	2.79	2.69	2.46	4.33	2.92	4.71	3.26	4.67	3.49	2.94	3.79	3.94	4.08	5.01	3.59	4.49	8.17	2.36	3.31	5.82	3.97	3.66	3.89	5.98	3.07	3.33	3.42	3.56	2.65	3.15	4.08	2.48	3.81	3.8	4.21	2.32	3.97	3.57	3.02	2.82	4.14	3.54	4.29	2.22	4.55	4.17	2.96	6.08
W4a27678|c0_g1_i4	0.75	0.72	0.82	0.47	0.41	0.63	1.22	1.45	3.57	0.48	2.91	1.74	2.06	1.76	0.85	3.98	2.51	0	1.24	2.58	1.84	1.05	0.93	1.03	11.05	0.77	2.23	0.98	0.81	3.12	2.24	2.16	1.28	0.9	1.58	1.59	2.35	2.42	0.51	1.75	0.22	0.76	0.56	0.9	0.71	2.24	2.71	1.14	1.74
W4a448|c0_g1_i1	0	0	0	0	0	0	4.12	1.48	0	0.57	4.3	1.99	4.3	5.39	0.92	5.18	0.77	7.56	2.19	2.95	1.79	13.57	1.26	0	3.35	0.12	2.11	2.07	2.39	0	1.42	3.02	0	0.26	0.75	0.21	0.34	0	2.23	1.04	1.26	1.44	0.89	4.48	0.67	2.69	1.49	0.9	3.11
W7b3996|c0_g1_i1	0	0	0	0	0.32	0.06	0.18	0	0.36	0.81	0.95	0.39	0.43	0.65	0.16	0	0	47.85	0	0.21	0	0	0.89	0	0.26	0.87	0.18	0	0.41	0	0.2	2.74	0.57	0	0.53	0.3	0.49	0	0	0.54	0.59	0	0	0.66	1.52	0.27	0	0.31	0.18
W0d7456|c0_g1_i1	3.3	4.32	1.9	6.91	1.93	3.67	3.63	5.22	6.91	4.46	3.36	4.4	4.87	5.14	2.13	3.53	9.33	5.21	3.81	3.26	3.97	4.04	5.11	6.06	6.64	5.78	6.9	3.65	4.07	5.11	5.01	4.93	5.03	5.9	4.46	2.54	2.28	3.86	3	6.9	2.72	4.34	4.09	4.01	1.91	4.12	5.1	5.07	6.25
W4a7657|c0_g2_i7	19.87	0.42	2.22	0.65	1.13	4.86	4.31	8.78	1.07	0.77	3.27	7.03	0.92	10.58	0	7.45	9.68	10.79	9.96	10.4	21.29	1.66	8.24	2.4	16.06	3.88	3.23	2.83	5.21	0.88	6.77	6.96	2.19	3.2	3.45	5.66	2.01	3.64	3.87	18.52	7.48	0.91	0.3	0.78	0.11	1.29	5.27	7.26	15.7
W5c23350|c0_g2_i1	0.32	0	0.14	0.28	0	0.15	0.16	1.06	1.76	0	10.3	2.21	3.89	0.86	1.73	3.57	0.32	3	2.36	0.93	4.24	0.71	0	1.89	1.99	0.61	0.94	4.38	1.44	0.33	0.71	1.78	5.06	0.99	0	1.08	0.86	0	1.2	0	0	0	1.78	0	0.84	0.97	3.12	1.41	0.64
Contig7800	0	0.18	0	0	0.39	0.11	0	1.56	0.63	0.48	5.58	1.38	4.85	0.32	5.91	0.7	0.18	13.45	8.14	0.73	0.37	0.2	1.06	0.95	0	2.06	0.35	2.23	0.13	0.37	1.9	2.31	0.92	0.74	0.79	0	0	0.97	1.8	0.4	0.2	0	0	0.22	2.26	0.54	0.7	2.21	0.81
W3d24768|c0_g1_i4	0.46	0.04	0.11	0.18	0.26	0.21	1.47	0.59	0.33	0.67	1.66	0.85	0.68	1.27	1.16	0.8	2.93	0.61	0.25	0.82	1.68	0.46	2.55	0.64	0.52	1.71	0.57	1.24	0.65	1.16	2.91	1.19	0.59	0.51	0.77	0.45	0.39	0.45	0.31	1.02	0.86	0.35	0	0.55	0.39	0.44	1.4	0.58	2.1
W7b18844|c0_g1_i11	1.32	0	0	0	0	0.26	0.66	0.23	2.9	0.08	1.58	0.91	4.7	1.26	0.17	0.18	2.83	0.88	1.26	1.19	0.15	4.25	0.65	0	0.27	0.18	1	0.4	0.28	1.73	0.1	1.13	0.22	1.64	0.09	0.16	0	0.34	0	0.42	0.61	0.93	0	0	39.35	0.42	0.12	0.05	11.43
Contig41282	0.4	0.15	0.43	0.22	0.48	0.34	0.76	0.25	0.25	0.31	1.21	0.53	0.47	0.49	0.63	0.82	0.25	0.1	1.9	1.16	0.33	0.5	0.49	0.53	1.35	0.33	0.44	0.47	0.56	0.15	1.39	0.65	0.63	0.21	0.44	0.34	0.2	0.09	0.56	0.78	0.55	0.21	0.21	0.48	2.57	0.98	0.45	0.54	0.65
Contig19913	1.6	1.72	0.69	1.62	1.16	1.36	3.74	2.78	4.67	3.25	7.53	4.22	9.4	7.14	15.83	6.66	27.07	10.56	2.05	6.64	2.48	6.16	5.93	6.87	1.93	2.44	19.76	3.54	7.01	4.27	4.12	7.89	1.67	9.38	2.68	0.82	2.13	3.8	5.73	1.9	4.05	0.87	0.98	1.5	2.5	4.53	10.87	7.96	12.1
W4a28429|c0_g1_i1	0	0.78	0.52	0	0.35	0.33	0.4	0.33	5.59	1.44	0	1.29	0.94	0	0.72	5.03	0	0	1.22	3.24	0.5	1.11	0.59	0.47	2.77	0.95	1.75	0.17	0.9	1.65	0.44	1.18	0	0.83	0	0	0.54	0.36	7.99	0	0	0	1.11	0.48	0.42	0.6	1.04	0	3.01
W7b15432|c0_g1_i1	0.38	0	1.6	0	0.99	0.59	7.55	2.67	1.53	3.06	0.07	2.53	6.7	0.25	1.89	17.01	0.06	5.75	1.03	0.47	0.15	0.17	3.02	0.22	1.41	1.25	40.07	0.05	51.85	12.11	0.38	7.57	1.43	4.09	0.06	0.05	2.51	0	4.91	0.19	0.17	0	3.22	0.11	6.46	3.44	0	0.97	4.18
Contig34651	0	0.14	0	0	0.5	0.13	0.43	0.23	0.42	0.51	0.3	0.42	0.55	0.38	0	0.82	0.85	0.44	0.35	1.15	0.47	0.47	0.7	0.33	0.62	0.68	0	0.48	0.64	0.73	0.63	0.54	0	0.29	0	0.24	0.57	0.25	0	0.53	0.15	0.2	0.59	0	0.3	0	0.73	0.48	0.81
W7b22996|c0_g1_i2	0.52	0.23	0.16	0.25	0.37	0.31	0.05	0.43	0.52	1.65	0.9	0.85	1	0.81	0.3	1.74	1	0	0.93	1.26	1.01	0.99	0.98	0.95	0.52	0.5	2.07	0.44	0.42	2.04	1.42	0.97	0.37	0.39	1.2	1.03	0.19	0.55	0.3	0.28	0.46	0.94	0.13	0.51	4.91	0.86	0.49	1.6	1.17
Contig15835	0.13	0.1	0.3	0.11	0.39	0.2	0.83	0.7	0.27	1.05	0.5	0.63	0.49	0.33	1.14	0.36	0.62	0.88	0.36	0.32	0.98	0.33	2.94	0.7	0.27	0.59	1.45	0.45	1.01	0.28	0.72	0.75	0.31	0.51	0.41	0.54	0.2	0.16	0.62	0.54	0.05	0.56	0.79	1.5	1.07	1.05	1.9	0.72	0.42
W3d16673|c0_g1_i1	0	0	0.23	0.09	0	0.06	1.12	2.5	0.69	0.28	1	1.02	0.58	1.09	0.33	0.66	0.27	4.73	1.23	0.86	1.27	1	2.56	2.37	0.19	0.56	1.7	1.04	0.48	2.83	0.29	1.26	1.04	0	0.16	0.49	0.14	0.47	0.4	0.04	0	1.72	0	0.32	0.22	1.12	1.64	0.96	4.74
Contig44788	0.13	0.09	0.04	0.08	0.23	0.11	0.4	0.4	0.92	0.55	0.56	0.52	1.31	0.63	0.67	0.43	0.27	0.6	0.11	0.15	0.65	0.24	1.39	0.47	0.26	0.72	2.06	0.3	0.3	0.18	0.68	0.6	0.21	0.23	0.26	0.3	0.24	0.63	0.5	0.46	0.1	0.75	0.18	1.12	1.62	1.46	0.4	0.47	0.66
W7b27826|c0_g1_i1	5.74	6.47	5.75	10.09	4.33	6.48	21.59	7.07	8.14	9.53	6.38	11.78	23.6	29.13	35.53	13.94	16.96	27.79	4.64	15.58	17.06	22.04	9.73	7.83	7.32	10.5	10.89	9.72	15.63	6.82	4.42	15.22	8.22	3.52	10.56	9.24	8.64	8.66	8.28	13.24	10.98	13.67	16.35	10.78	12.14	13.15	18.93	11.52	20.28
Contig15834	0.18	0.24	0.17	0.22	0.73	0.31	0.73	0.71	0.35	0.85	0.71	0.61	0.49	0.65	0.95	0.56	0.66	1.12	0.25	0.44	0.72	0.33	2.87	0.74	0.27	0.69	1.32	0.43	0.71	0.21	0.58	0.74	0.1	0.85	0.74	0.32	0.24	0.36	0.75	0.78	0.08	0.82	0.84	1.76	0.89	0.64	1.4	0.77	0.49
W4a24103|c0_g2_i2	0	0.09	0	0.15	0	0.05	0.27	0.44	1.06	0.48	0.09	0.42	0.41	0.32	0.08	0.77	0.09	0	1.08	0.72	0.22	0.39	1.05	0	2.51	1.18	0.43	1.36	0.26	0.27	0.1	0.59	0	0.09	0.6	1.19	0.35	0.16	0.33	0	0.19	0	0	0	0	1.6	0.11	1.35	0.62
Contig6574	0.5	0.54	0.63	1.24	0.63	0.71	1.52	1.76	1.05	1.5	1.69	1.73	2.13	1.72	1.82	2.49	2.51	2.19	2.93	3.58	1.53	1.92	2.36	2.07	1.41	1.02	3.35	2.66	1.44	3.16	1.19	2.18	1.09	1.15	1.98	2.34	1.38	1.46	1.91	1.96	0.83	1.2	0.89	0.62	1.21	2.55	2.06	2.17	2.13
Contig12497	1.76	4	0.86	0.33	0.77	1.54	1.51	9.39	1.12	0.11	11.66	3.96	3.51	1.57	0.56	4.94	4.76	31.45	0.46	0.14	0.51	16.4	57.63	0.88	1.27	1.66	0.73	3.19	0.19	26.24	3.59	8.4	2.65	0.13	0.37	8.36	35.85	0.67	0.16	19.88	0.68	0	0	0	1.57	0	4.03	0.49	226.28
W7b11992|c0_g2_i1	0	0	0	0	0	0	0	1.03	0	0	0	0.17	0	0.37	0	0	0	0	0	0	0	10.79	0	0.24	0.08	0.2	0	0.09	0	0	2.99	0.78	0	0	0	0	0.56	0	0	0.31	0.91	0	0	0	7.94	0.47	0.13	0	0
W6b18036|c0_g1_i1	0	0.28	0	0.13	0	0.08	0	0	1.15	0	0	0.34	0.9	0.26	0	0.28	0	1.34	0.7	1	0.59	2.54	1.98	0.34	0	0	0	0	0	0.3	1.27	0.61	0	0	0	0	0	0.26	0.9	2.13	0	0.41	0	0	0	0	0.37	0.08	0.24
Contig40199	0	0.11	0.71	0	0	0.16	0	23.8	0.12	0.21	0.12	4.04	0.91	4.08	0.21	1.24	1.29	11.73	0.57	0	0.29	0.26	0.23	0.55	0.17	9	19.47	2.58	25.54	0	0.65	4.14	0	26.15	0.23	7.62	0	1.15	0.44	0	0.25	0	0	6.47	20.02	3.33	0	0.43	0
W7b2566|c0_g1_i1	0.83	0.25	1.2	0.44	0.11	0.56	0.51	35.89	0.5	0.34	0.27	6.27	1.58	6.51	0.57	0.61	2.91	16.62	1.08	1.46	0.73	0.77	0.75	0.59	0.83	9.68	30.2	7.96	26.51	0.13	0.77	5.8	0.2	35.71	0.55	15.55	1.01	2.26	0.55	0.09	0.34	0.18	0	12.49	52.01	6.74	0.33	0.57	0.17
W4a9725|c0_g1_i1	0.32	0	0	0	0	0.06	0.32	0.27	0.8	0	0.68	0.34	0.63	0.58	0.58	0.47	0.32	0	0.2	0.19	0.79	0.71	0.32	1.7	2.34	0.61	0	1.92	0.72	2.64	0.36	0.79	0.76	0.33	0	0	1.29	0.14	1.4	0	0	0	0.45	0.97	1.01	0	0.42	0.54	1.23
W4a9177|c0_g1_i1	0.78	0.76	2.26	0.6	1.09	1.1	2.5	2.62	0.96	1.78	0.59	1.62	2.04	1.2	1.54	3.12	3.68	3.16	1.56	2.83	2.48	4.77	1.01	1.06	3.64	1.78	1.33	1.88	0.65	5.45	3.17	2.44	1.17	1.15	1.42	2.29	2.2	0.94	2.86	2.42	1.08	0.57	1.85	2.1	1.63	2.48	1.65	3.01	2.97
W3d31032|c0_g1_i2	2.25	1.53	1.97	1.4	4.39	2.31	2.4	3.24	1.41	2.84	4.35	2.63	1.95	2.95	4.06	4.32	6.63	3.06	3.74	2.8	2.34	2.6	7.65	2.9	2.44	2.67	2.97	5.15	2.85	1.72	2.48	3.44	1.82	4.42	3.35	3.47	1.25	3.4	3.35	1.96	1.71	3.37	1.66	2.3	3.17	1.69	4.83	3.83	2.89
W3d30561|c0_g1_i1	0	0	0	0	0	0	0	0	0	0.66	0	0.14	0.72	0	1.48	1.59	0	0	0	0	0.6	0.4	1.44	0.22	0.4	0	0.36	0.16	0.27	1.32	0.2	0.48	0.29	0	0.18	0	0.24	0.49	0.23	0	0	0.26	0	0	0	0	0.24	0	0.73
Contig24849	2.19	0.48	1.79	0.69	0.43	1.12	0.89	0.65	6.01	1.24	0.73	1.78	4.87	3.1	1.78	2.96	1.69	0.92	2.66	2.74	2.69	2.08	1.56	1.63	0.36	1.7	1.34	2.7	2.44	3.75	1.75	2.25	1.94	2.65	2.12	1.57	0.93	1.41	2.83	1.17	0.97	0.56	0.96	1.91	0.41	1.34	2.3	3.26	5.84
Contig8022	0.06	0.34	0.15	0.36	0.1	0.2	0.3	0.54	0.12	1.8	0.62	0.58	3.41	0	2.7	2.56	2.37	0.92	2.23	2.04	0.87	0.39	0.35	0.49	0.39	0.39	3.15	0.5	3.62	0.73	2.29	1.55	0.23	1.15	1.04	0.2	0.39	0.84	1.4	0.57	0.71	0	0.65	0.07	2.84	1.15	1.91	2.06	2.18
W3d15045|c0_g2_i1	0	0	0.12	0.35	0.71	0.24	0.41	0	0	0.48	0.43	0.43	1.37	1.21	0	0	0	0.7	0	2.49	0	0.15	3.32	0	0.59	0.51	0.26	1.04	4.14	0.14	1.05	0.89	0.42	0	1.84	1.92	0	0.12	0.17	0.3	0	0.19	0	0.16	0	0.41	0.87	0.15	0.18
W3d29110|c0_g1_i2	1.15	0	0.33	0.42	1.09	0.6	0.58	0.32	4.37	0.43	1.9	1.33	0.75	0.77	2.06	3.59	1.34	0.69	1.05	4.08	5.11	2.85	7.9	4.72	1.11	1.36	2.22	3.17	1.14	5.58	1.16	2.67	0.98	1.08	1.58	1.84	0.89	0.43	0.95	0.71	2.5	1.75	1.19	2.76	0.7	2.01	5.31	1.05	2.61
W2b28427|c0_g1_i1	0.16	0	0	0	0	0.03	0	0.92	0	1.28	7.32	1.59	2.6	5.82	34.46	3.36	6.83	0	0.19	0	2.09	14.18	0	7.27	0.35	10.72	4.31	1.76	0.24	32.51	3.16	6.83	0.25	3.91	0	7.7	0	0	0.59	0.12	0	5.14	0	0.96	1.16	0.48	5.74	8.76	5.81
Contig5412	1.16	0.99	0.85	0.69	0.69	0.88	1.09	0.87	1.02	1.42	1.11	1.21	2.11	1.92	1.69	2.41	2.41	1.2	1.33	2.74	1.33	1.78	2.98	2.6	1.53	1.54	2.46	1.96	1.9	2.26	1.46	1.98	0.96	1.22	1.25	1.57	1.23	1.15	2.13	1.85	0.72	1.3	0.69	1.99	1.79	1.29	1.83	1.38	2.94
W4a28353|c0_g1_i1	0	0.16	75.25	0.14	0	15.11	24.89	19.52	162.3	0	0	34.45	153.17	1.47	4.13	32.12	61.02	0	3	2.84	1.49	0	0	0	522.26	32.02	132.61	1.68	311.5	1.18	39.76	68.43	0	0.34	1.12	274.26	22.13	3.37	0	0.97	0.72	126.32	2.05	28.9	1.89	2.22	18.24	1.9	128.84
W3d22083|c0_g1_i1	0	0	0	0	0.26	0.05	0.6	1.04	3.81	0.64	0	1.06	0	2.09	2.95	3.63	0.18	0.25	1.75	0	3.69	0	10.94	5.13	2.52	2.28	0	1.98	2.32	0	1.45	2.17	1.97	0.98	1.46	2.8	0	0.75	0	1.64	0	0	0	0.29	0	0.36	5.02	5.94	8.03
W5c13870|c0_g1_i1	0.42	0.08	0.29	0.36	0.44	0.32	0.5	0.83	2.99	0.37	0.7	1	1.11	0.6	1.5	0.89	3.18	0	0.51	0	0.89	0.83	0.99	0.88	1.27	1.67	4.13	1.28	1.37	1.2	2.03	1.28	2.62	0.26	0.98	0.56	0.78	0.9	1.46	1.55	0	0.24	0.58	0	0.52	0.75	1.4	0.66	4.4
Contig8228	0.27	0	0.05	0.94	0.19	0.29	1.74	2.51	0	0.19	1.82	1.12	2.87	0.1	6.32	0	0	0.22	0.26	1.19	6.29	0	4.37	10.57	3.07	6.34	2.15	4.98	6.23	0	0.24	2.91	1.53	0.11	0.53	3.4	0.65	0.19	3.57	0.16	0.18	1.22	0.98	0.13	0.68	2.69	8.12	0.53	5.4
W4a21557|c0_g1_i1	0	0.78	0.34	0.17	0.17	0.29	0.4	1.15	4.37	0.54	0.42	1.15	8.72	0.36	0.18	1.73	1.2	1.24	0.73	0.92	3.94	3.08	0	2.58	11.88	2.09	0	0.68	1.34	0	0.66	2.17	0.94	1.64	0.78	0.67	0.53	0	0.74	0	0.87	5.06	0.83	0.96	1.67	0.9	5.15	0.62	0.66
W2b4292|c0_g1_i1	0	0.51	0.46	0	0.46	0.29	0.11	1.05	1.16	0.76	2	0.85	3.39	1.14	2.95	1.33	1.49	1.54	0.13	2.08	0.87	1.05	1.25	0.25	0	0.81	1.03	0.81	1.03	1.63	1.88	1.3	0.08	0.22	0.41	0	1.42	0.47	1.71	1.65	1.73	1.05	0.15	0.38	0.33	2.71	2.19	0.84	2.9
Contig5388	0.61	0.08	0.49	0.14	1.35	0.54	1.76	1.58	0.08	1.89	0.17	3.89	13.21	1.57	0.07	0.67	4.08	6.28	8.05	2.3	7	2.11	5.77	8.66	3.07	7.01	0	2.88	0.58	0.17	8.29	4.3	3.36	0.17	2.06	7.02	1.3	0.15	2.68	0.12	1.95	1.26	0	0.54	1.19	7.34	15.67	23.07	8.38
Contig2976	0.14	0.26	0.27	1.17	0.31	0.43	0	1.56	1.83	1.04	0.19	1.11	1.47	1.05	1.09	2.04	6.98	0.09	2.25	1.4	1.11	1.54	1.72	0.48	0.82	0.68	0.87	1.41	0.87	2.62	1.39	1.57	2.15	0.65	0.61	0.9	0.3	0.6	1.12	1.63	0.44	1.14	1.18	1.19	1.27	0.88	1.45	1.2	1.12
Contig8679	0.49	0.59	0.63	0.21	0.64	0.51	2.8	2.1	0.12	1.52	0.51	1.52	1.61	0.98	4.03	1.4	2.43	0.88	2.07	3.08	1.1	2.14	5.84	2.42	1.85	0.46	5.41	2.79	1.63	2.11	1.74	2.31	1.43	1.25	0.24	3.15	0.97	1.62	1.51	2.78	0.53	1.03	1.01	0.88	1.4	0.18	2.35	1.43	2.26
W6b14359|c0_g1_i2	2.13	1.45	1.6	1.71	1.69	1.71	4.27	2.51	1.43	3.3	1.43	2.56	3.26	3.64	3.21	4.26	3.73	2.45	2.81	6.91	2.7	6.32	2.42	3.04	3.05	2.8	2.47	2.94	2.55	5.27	2.47	3.49	3.07	1.75	2.56	3.16	2.55	2.06	2.56	2.42	1.38	1.52	1.39	1.69	2.21	1.96	3.42	2.46	4.83
W3d24421|c0_g1_i1	0.26	0	0	0	0	0.05	0.13	1.3	2.88	0.47	0.28	0.84	0.92	0	0.95	0.25	0	5.05	2.73	1.82	1.73	0.87	1.81	0.31	0.19	1.5	0.64	2.47	3.24	0.94	2.91	1.49	0.21	1.08	0	0.22	1.05	0.47	0.33	0.19	0.43	0.37	0	0	0.28	0	0.34	1	0.31
W5c15611|c0_g2_i1	1.04	0.89	1.89	0	0.3	0.83	0.58	1.43	2.06	0.21	7.36	2.06	1.35	1.44	1.34	3.33	2.42	0.24	1.54	5.04	1.23	2.92	1.7	0.41	0.84	1.97	3.91	7.54	3.44	2.95	1.78	2.39	4.16	1.89	1.35	0.96	0.15	0.72	2	1.87	0.63	1.46	0.64	0.42	1.2	2.42	6.39	1.69	2.45
Contig13226	1.05	0.44	0.67	0.28	1.03	0.69	0.85	1.29	2.72	1.92	0.34	1.24	0.71	0.93	0.41	2.2	4.5	2.29	1.59	2.25	1.45	0.72	1.92	0.92	1.51	0.87	2.4	1.99	0.53	2.2	1.22	1.61	0.72	1.34	1.08	0.49	1.04	1.28	1.94	0.67	0.5	0.83	1.17	1.33	0.48	0.78	1.35	1.21	1.69
Contig19440	0.98	1.21	0.92	1.01	1.34	1.09	2.23	2.33	0.55	2.4	1.84	1.7	4.98	2.24	1.87	2.58	4.54	2.92	2.2	2.67	1.94	1.48	0.27	1.47	2.55	1.32	3.9	1.69	2.28	0.9	2.25	2.32	1.49	1.24	2.21	0.7	0.62	2.44	1.15	1.1	2.37	0.98	1.09	0.67	1.98	1.74	2.57	3.27	3.79
Contig21551	7.73	1.08	3.96	0.71	0	2.7	8.17	0.18	17.51	1.32	11.32	9.46	13.33	7.68	3.92	101.94	38.61	2.3	4.6	14.5	10.28	72.39	13.32	56.52	109.76	5.49	11.05	24.99	1.22	63.6	36.32	31.15	11.04	47.66	0.79	0.43	1.68	14.4	4.51	5.8	0.24	19.6	3.18	11.42	2.17	32.56	2.96	7.42	31.61
Contig44097	8.73	16.38	15.17	3.4	2.13	9.16	6.99	11.66	2.73	18.81	18	11.77	14.54	11.92	22.12	18.21	17.56	24.68	11.65	15.47	9.28	13.62	9.84	11.29	9.85	8.84	14.48	9.38	11.27	10.05	7.02	13.21	5.86	5.17	11.82	8.72	13.7	8.98	13.97	8.8	8.08	6.87	5.28	6.06	12.17	14.81	12.4	19.27	10.9
W2b12576|c0_g2_i8	2.03	2.12	1.96	2.04	3.16	2.26	1.94	6.31	2.59	3.38	3.96	3.28	1.9	3.91	3.84	3.24	3.53	5.22	3.48	4.36	3.11	3.52	2.97	1.88	4.82	3.2	3.99	4.79	4.14	3.79	4.46	3.69	3.82	4.57	2.86	2.74	2.35	3.82	3.34	1.93	2.29	1.89	0.7	0.91	1.58	2.52	4.01	4.11	3.44
Contig13938	3.53	1.97	1.34	1.81	1.15	1.96	5.08	4.23	3.97	4.52	3.56	3.94	6.32	5.92	12.24	3.84	25.82	4.69	3.7	6.38	5.44	4.4	12.88	8.61	5.32	2.89	12.58	3.7	6.4	3.42	3.42	7.26	4.39	6.12	1.91	1.84	1.99	3.77	8.81	4.05	4.28	2.01	1.9	2.44	5.17	5.28	11.54	6.3	8.68
W4a24423|c1_g1_i2	0.31	0.25	0.18	0.18	1.44	0.47	0.51	2.54	0	0.14	1.72	0.94	0.12	0.05	0.09	0	16.12	4.25	0.31	0.12	3.16	0	5.39	4.64	3.68	2.58	4.47	1.92	0	0.16	0.23	2.49	2.21	3.63	1.2	1.67	0.82	0.18	0.25	0.53	0	0	1.21	0	2.63	0.23	6.35	0.09	3.62
W7b27441|c0_g1_i1	0	0.41	0.43	0.31	0.5	0.33	0.57	1.05	0.56	0.63	3.04	0.99	1.99	5.07	0.51	0.2	0.28	0.59	7.33	4.89	0.81	0.23	0.56	0.91	7.55	5.45	6.99	2.17	6.39	0.22	0.63	2.78	0.5	0	0	3.37	0	2.84	0.53	3.19	0.15	1.59	0.2	1.11	9.69	0.11	0.09	0.22	0.87
W5c791|c0_g1_i1	0.22	0	0.09	0	0.19	0.1	0.22	0.18	0	0.39	1.84	0.46	0	1.67	2.56	0.21	0.77	0.23	0.67	0.63	1.26	0.48	0.86	0.39	0	1.04	8.19	1.21	0	0	2.43	1.19	1.72	3.5	0	0.55	0	0	1.23	0.16	0	0	0	0	0	0	2.69	0	0.22
Contig21217	0.47	0.53	0.94	0.3	0.82	0.61	0.78	5.33	0.81	0.8	5.59	2.38	6.07	4.84	1.89	4.31	5.22	12.74	5.17	10.28	12.1	2.1	3.29	1.78	13.64	3.22	9.55	15.6	2.3	2.35	7.79	6.54	4.19	1.6	4.81	4.33	1.3	2.02	0.44	3.77	1.19	0.93	0.81	2.11	6.1	5.32	3.12	3.85	2.1
W5c28618|c0_g2_i5	0.58	1.06	0.39	0.06	0.56	0.53	1.61	1.06	0.25	0.11	0.74	0.87	1.15	0.52	0.11	0.62	12.95	0.86	2.89	1.48	11.58	0.42	0.94	7.3	0.46	0.12	0.93	1.36	0.05	0.98	0.21	2.36	5.07	0.13	0.25	0.43	0.17	0.17	1.11	1.33	2.37	0	0.89	0	1.41	0.1	3.39	2.97	0.43
W5c12587|c0_g1_i2	1.73	1.39	2.04	1.99	3.76	2.18	1.29	1.89	0.28	19.71	4.13	5.31	12	5.89	7	9.79	7.03	1.93	8.56	4.29	4.3	4.34	7.53	4.29	3.43	5.58	4.37	9.26	8.92	3.23	3.01	6.04	29.78	3.68	2.65	5.27	0.38	3.77	3.56	1.48	4.13	1.61	0.5	1.9	8.53	2.15	6.29	14.61	2.96
W3d18020|c5_g2_i4	1.76	2.41	5.9	1.87	2.67	2.92	1.19	64.8	8.48	13.68	3.67	15.97	84.26	19.36	86.47	27.48	42.08	8.95	11.3	51.9	20.76	49.96	235.44	5.31	3.93	10.8	8.71	15.04	22.89	85.11	27.6	43.02	8.82	5.28	22.88	57.75	17.11	5.75	11.59	5.35	19.86	2.86	2.9	10.62	4.72	6.53	6.05	114.61	20.73
W3d18020|c5_g2_i3	4.57	6.34	7.95	2.43	5.38	5.33	3.58	13.53	18.21	39.85	7.93	15.21	64.95	46.78	49.8	21.61	39.59	12.38	19.26	51.84	37.3	51.47	94.42	10.05	22.32	14.92	47.52	67.92	35.49	41.12	46.5	40.8	5.85	3.44	16.5	9.63	25.76	16.69	67.78	12.86	35.63	12.67	11.24	8.46	6.71	19.77	25	38.98	31.59
W1a8026|c0_g1_i1	0	0	0	0	0	0	0	0	0	0	0	0.31	0.8	0	0	4.93	0	0	0	0	4.93	0	1.15	0	0.11	0.28	0	0	2.29	0.15	2.75	0.92	0	0	0	0	0.98	0	0	0	0	4.95	0	1.59	0	0	0	5.56	0.54
Contig41834	2.59	1.97	0.82	1	3.56	1.99	1.7	6.37	3.44	4.97	5.75	4.57	20.45	13.1	13.74	2.61	6.24	5.4	18.76	15.94	8.19	10.16	18.79	9	10.82	10.05	19.37	13.66	32.87	10.48	19.18	13.62	15.48	3.9	2.64	3.17	5.24	15.36	5.65	5.31	11.06	4.49	1.88	1.88	28.69	4.27	4.29	9.67	6.72
W2b1178|c0_g2_i1	0.65	0	0	0.45	0.51	0.32	0.32	17.29	0.51	0.69	0.88	3.41	0.7	44.51	93.29	4.52	13.64	72.25	0.39	0.52	1.37	0.99	23.31	0.3	0.19	1.59	0.12	0.55	0.38	4.34	52.42	16.6	0.45	0.07	0.38	37.58	2.57	0.17	0	18.78	0.21	0.27	8.01	0.08	0.2	0.48	0.17	37.8	13.69
W4a11851|c0_g5_i1	1.13	1.1	0.73	0.74	0.99	0.94	2.41	5.24	1.54	0.38	1.77	1.96	1.87	8.2	3.8	1.22	8.33	1.02	2.24	0.65	1.97	3.27	4.58	1.49	8.49	2.01	2.46	1.56	2.42	2.02	3.59	3.22	0.77	0.58	2.2	0.35	1.51	1.38	6.31	1.25	2.46	5.76	1.95	2.21	1.33	2.33	4.01	1.55	3.43
W2b32596|c0_g1_i1	0.65	0.92	0.95	0.89	1.09	0.9	1.4	1.12	1.28	1.89	1.03	1.41	2.74	1.42	4.65	2.15	1.78	2.11	1.34	2.57	2.46	1.46	2.42	1.87	1.92	1.44	3.59	2.41	1.78	0.93	1.25	2.12	1.22	1.44	2.65	1.9	2.37	1.65	1.88	0.53	1.36	1.38	0.84	1.09	1.26	0.85	3.47	2.92	1.65
W5c3317|c0_g1_i1	0	0	0.06	1.05	0.35	0.29	0	0.22	1.06	0	2.24	0.62	1.09	2.27	1.38	0.64	0	0	1.14	2.08	0.38	0.07	1.38	0.31	0.19	1.33	0.26	1.48	0.15	0.55	0.3	0.79	1.94	0.62	0.07	0.56	0.18	1.13	0.33	0.1	1.82	0.09	0.19	0.64	0.35	0.2	1.55	0.49	1.73
W2b5212|c0_g1_i1	1.78	6.27	1.53	0.84	0.42	2.17	9.72	4.66	24.71	8.37	10.66	9.86	42.42	9.68	64.61	15.24	11.8	20.06	37.41	12.1	4.38	8.9	2.22	13.28	7.85	26.71	18.78	14.97	13.74	12.4	38.37	19.73	3.17	48.42	3.46	4.32	3.02	18.73	6.02	6.33	16.69	3.18	12.75	12.84	2.53	20.61	4.17	14.5	18.33
W2b30387|c0_g2_i1	0.66	0.64	0.43	1.14	0.43	0.66	1.48	1.49	3.1	0.73	1.03	1.39	6.92	2.06	3.68	1.9	0.99	2.04	1.8	2.08	2.43	0.36	3.55	6.37	5.24	1.87	2.55	1.96	0.37	1.51	0	2.51	0.64	0.67	0.8	1.79	1.1	0.59	2.66	0.24	2.86	3.01	5.46	3.36	2.23	0.49	0.85	2.4	3.94
W4a130|c0_g1_i1	1.61	1.98	0.38	0.25	0.51	0.94	1.02	2.4	1.59	1.17	3.81	1.74	1.13	3.51	1.7	7.42	2.18	1.66	5.67	0.34	1.79	1.44	1.14	3.08	7.49	0.69	6.62	3.09	2.06	1.64	0.96	2.82	1.83	1.34	1.13	1.58	2.33	1.3	2.53	4.3	2.22	0.41	2.62	1.23	1.06	0.66	1.88	2.58	1.21
W3d6333|c3_g2_i3	0.33	0.24	0.14	0.22	0.22	0.23	1.66	1.16	0	0.96	0.43	0.72	0.9	0.44	0.45	0.88	0.75	0.77	0.81	2.48	0.41	0.46	13.03	0.68	0.36	1.02	1.28	1.97	1.17	0.42	0.82	1.53	0.33	1.28	0.48	0.97	1.44	0.74	0.62	0.25	0.45	0.47	1.15	0.6	0.09	1.12	2.57	1.14	1.16
Contig12949	1.2	0.13	0.49	0.89	1.48	0.84	3.73	1.37	7.02	2.22	2.26	3.07	25.55	30.72	23.51	14.47	6.11	3.02	10.19	13.84	7.75	9.4	5.12	3.35	2.19	1.96	3.15	1.86	2.7	2.21	3.92	9	4.69	1.64	4.1	3.5	2.3	5.09	4.82	3.17	2.17	2.48	2.34	3.16	3.47	2.59	4.67	3.67	5.77
W3d15120|c0_g1_i1	0.62	0	0	0	0.22	0.17	1.5	0.41	2.72	1.33	2.61	1.47	11.53	6.67	1.67	0	0	9.01	2.73	8.45	2.86	0.82	11.61	5.55	0.36	0.83	2.41	3.17	7.88	0.51	7.28	4.39	1.85	0.51	2.06	2.29	2.16	0.44	1.24	2.39	0.54	1.05	0.52	1.8	4.68	0	2.73	1.61	1.28
Contig15215	0.31	0.6	0.53	0.04	0.12	0.32	0.93	1.16	0.57	1.81	0.6	0.96	2.82	1.77	1.19	2.12	2.29	1.55	1.24	1.98	0.58	1.31	3.51	0.47	2.46	1.17	2.99	0.97	1.97	1.44	1.56	1.76	1.04	0.63	1.07	1.4	0.94	0.55	1.04	1.24	0.77	0.87	0.73	0.53	0.78	0.73	0.97	0.71	1.26
Contig7771	0	0	0	0	0.05	0.01	0.81	2.5	1.72	1.1	0.13	1.21	0	4.31	7.82	5.42	0.19	0	1.96	0	6.15	0	9.42	10.67	3.41	3.29	0	3.63	4.47	0.13	3.48	3.39	2.91	1.33	1.98	5.89	0	2.15	0	3.61	0	0	0	0.67	0	1.48	9.81	11.57	14.3
Contig10819	0.26	0.5	1.26	0	0	0.4	2.67	7.1	3.25	7.99	8.38	4.9	55.11	9.39	56.25	17.64	18.51	7.21	6.92	0.2	0	16.78	43.79	8.39	2.75	3.84	0	0.37	1.99	54.96	14.26	16.76	31.92	12.1	11.89	34.24	6.42	2.92	0	0	0	2.18	0	7.56	1.71	0	15.21	11.13	14.2
Contig11718	0.53	0	0.34	0.92	0.23	0.41	1.19	1.09	1.31	0.71	2.91	1.25	2.17	1.54	2.85	2.42	2.91	1.1	1.77	2.13	1.74	6.42	0.52	0.31	1.44	2.14	0.77	0.23	0.99	1.35	0.58	1.76	0.93	1.49	0.64	0.89	2.12	3.9	0.99	0.59	0.58	1.49	0.37	0.8	2.35	1.19	1.2	0.86	2.69
W5c12021|c0_g1_i1	0	0	0	0.33	0.11	0.09	1.41	1.43	1.02	0.4	0.34	0.81	0.05	1.26	0.69	0.86	0.38	3.52	1.56	0.81	3.53	0.49	2.46	1.73	0.33	0.61	1.06	1.04	0.29	3.54	0.21	1.29	2.01	0	0.75	1.34	0.51	0	0.96	0.33	0.07	1.17	0	0.77	0	1.15	0.91	1.46	5.48
W2b24717|c0_g2_i2	0.37	0.89	0.35	0.51	3.55	1.13	0.48	15.38	1.71	5.13	6.24	5.44	12.4	6.05	17.32	2.75	3.44	1.7	13.91	6.62	4.36	2.62	4.78	7.21	1.67	7.02	14.74	9.48	6.74	5.2	6.75	7.09	6.74	1.5	6.05	3.64	3.41	3.07	7	12.74	4.57	2.01	2.99	3	6.69	7.96	12.22	14.39	4.43
W4a31260|c0_g2_i1	0	0.34	0.1	0.1	0	0.11	0.35	4.51	1.5	1.98	0	1.43	2.9	3.12	3.97	0.34	0	0.96	0.71	0.27	1.63	1.54	1.14	4.1	4.9	3.1	1.92	0.59	3.47	0.83	3.34	2.04	1.46	4.3	0.34	0.39	0.47	1.56	2.75	0	0.51	0.33	2.42	3.65	1.34	3.32	0	0.07	0.97
W3d12896|c0_g1_i6	0.2	0.1	0.39	0.09	0.13	0.18	0.2	1.27	4	0.93	1.61	1.47	3.41	0.76	1.29	1.67	5.76	0.31	2.97	2.52	1.71	1.59	4.78	1.4	0.76	0.57	2.26	2.74	1.67	2.29	1.37	2.1	0.9	0.66	0.68	2.33	1.26	0.62	3.02	2.09	1.03	1.05	1.03	0.6	0.88	2.09	1.92	3.34	5.06
Contig13673	3.96	3.89	4	4.12	2.6	3.71	11.65	8.92	4.04	9.56	22.95	11.66	15.42	13.71	14.78	18.95	30.05	3.14	8.79	12.52	13.54	27.49	15.46	14.91	15.52	13.92	15.79	10.6	17.54	29.93	12.77	16.04	16.33	5.93	7.4	15.16	13.81	8.11	16.49	4.82	9.65	8.05	12.2	3.58	9.09	24.3	38.32	10.28	18.6
W4a11339|c0_g1_i4	0.07	0.07	0	0	0.06	0.04	0.34	0.11	3.43	0.54	0.21	0.85	1.85	0.48	0.24	0	0.07	0.42	0	0.39	0.22	1.12	0.93	3.66	3.78	1.61	3.02	0.17	0.96	0.55	1.27	1.09	1.01	0.97	0.07	0.06	0.81	3.2	0.67	0.2	0.15	0	0.84	0.9	0	4.98	0.09	0.3	0.07
W3d28821|c0_g1_i1	0.36	0.45	0.25	0.38	0.54	0.4	1.41	0.83	0.91	0.89	1.03	0.91	0.87	0.66	2.03	0.64	1.11	2.05	0.69	0.48	1.78	0.46	4.24	1.78	0.62	1.23	2.35	0.71	0.73	0.45	1.41	1.28	0.72	1.41	1.4	0.99	0.52	1.14	0.74	1.19	0.51	0.89	1.5	2.55	1.5	2.11	2.4	1.99	1.31
Contig8047	0.28	0.33	0.39	0.02	0.47	0.3	2.53	1.61	1.21	1.67	1.46	1.53	3.47	3.4	3.08	4.45	2.56	3.61	1.52	2.42	2.08	5.57	1.76	1.1	1.03	1.05	1.95	1.66	1.46	2.03	1	2.38	1.49	1.14	1.52	2.44	1.29	0.76	1.23	0.73	2.5	1.92	2.47	1.95	1.81	1.96	1.76	2.02	2.65
Contig38709	0	0.19	0	0	0.44	0.13	0.2	2.56	2.49	2.51	2.42	1.7	0.7	1.88	0.09	0.39	11.74	1.97	0.24	1.27	1.32	3.21	0.2	1.41	0.15	14.4	26.82	3.67	0.97	0.1	4.43	3.95	0.39	0.21	9.56	3.02	5.22	5.37	2.49	1.26	0	0.14	0.28	0.12	23.9	0.9	7.38	2.43	0.07
Contig33478	0.54	0.6	0.32	0.29	0.29	0.41	0.75	2.71	3.55	1.08	2.44	2.4	3.34	2.68	2.98	7.92	5.74	0.52	4.61	2.68	1.81	3.98	1.51	2.29	3.53	2.76	3.62	3.96	2.7	4.3	3.9	3.41	1.34	1.49	1.54	3.34	2.16	1.93	3.25	12.23	2.4	3.16	0.63	1.8	1.78	6.8	6.7	4.47	8.19
W5c22327|c0_g2_i1	0.27	0.39	0	0.35	0.7	0.34	1.74	0.22	0	0.72	1.68	0.73	0.94	0.36	0	0.51	0.93	1.24	0	0.61	2.08	0.59	0.26	1.25	0.48	0.25	1.29	0.23	0.8	1.37	1.92	0.8	2.83	0.68	1.56	0.22	1.25	0	0.33	0.69	0.58	0.19	0.92	0.96	0.98	0.8	0.17	0.86	4.13
W5c24179|c0_g2_i1	5.88	2.55	7.39	1.69	3.86	4.27	14.38	4.27	6.24	5.38	14.39	9.38	14.14	16.46	9.66	34.3	10.35	12.02	11.27	8.01	19.45	10.38	8.17	5.88	9.96	14.11	19.96	23.79	6.64	22.92	5.62	13.85	18.29	4.09	5.12	14.18	8.82	7.57	28.35	7.65	4.15	3.82	16.32	5.21	10.37	11.33	9.63	8.95	15.66
W2b26535|c0_g1_i7	0.28	0.93	0.47	0.6	0.48	0.55	1.93	0.79	2.26	1.17	0.79	1.21	0.43	0.92	3.21	1.19	2.2	0.07	0.34	4.91	3.22	4.4	2.16	1.62	0.35	1.18	1	0.64	1.64	3.1	1.29	1.78	0.59	0.49	0.47	1.73	0.73	1.72	1.28	7.32	2.1	0.68	0.29	1.99	1.29	1.34	5.24	3.68	0.55
W3d4597|c0_g1_i1	0.21	0	0.6	0.09	0.23	0.23	1.33	0.75	1.22	0.62	0.95	0.84	1.41	2.19	1.05	2.2	1.01	2.09	1.04	1.96	1.57	3.11	1.57	0.81	0.31	0.66	0.72	0.41	1.35	0.54	0.76	1.3	0.84	0.98	0.88	1.96	0.07	0.43	1.06	0.94	1.1	1.27	2.28	0.58	0.39	0.96	0.96	0.79	1.91
Contig15723	0.77	0.8	1.26	1.02	0.91	0.95	1.43	0.79	1.1	1.52	0.98	1.23	1.41	1.01	0.95	1.39	1.19	0.75	1.22	1.27	1.21	0.75	2.13	1.27	1.17	1.7	1.65	1.45	0.86	1.28	1.93	1.29	0.92	1.61	1.41	1.1	0.77	1.63	1.11	1.1	0.79	1.11	1.53	1.59	0.76	1.37	1.59	1.39	2.76
Contig37595	0.18	0	0	0.16	0.08	0.08	0.63	0.22	0.18	0.16	0.65	0.42	1.04	0.88	0.16	0.86	0.18	0.28	0.65	0.41	0.29	0	1.23	0.63	0.26	0.68	0	0.91	0.53	0.73	0.3	0.53	0	0.46	0.96	0.45	0	0.24	0.33	1.72	0	0.5	0	0.43	0.19	0.54	1.38	0.45	1.81
W2b17352|c2_g1_i1	0	0	0.53	0	0	0.11	4.49	0	0.81	0.36	0.43	1.16	0.32	1.09	10.4	0.39	1.42	0	0	1.41	5.01	0.9	4.8	0.48	0	0.58	1.18	2.94	0.61	0	0.45	1.68	0.32	0.21	0.4	0.34	5.15	0.36	0	0.15	2.43	0	0.56	0	0.64	1.83	11.81	2.63	0.61
W1a12836|c0_g1_i2	1.98	2.61	2.45	2.07	2.17	2.26	2.21	3.49	4.63	3.41	2.31	3.34	2.64	2.82	3.15	2.76	7.31	2.65	2.87	1.95	3.12	2.88	4.08	4.82	4.91	3.9	4.84	2.92	2.56	4.59	3.88	3.61	2.61	4.29	2.72	3.71	2.77	3.43	2.74	3.26	2.54	3.54	4.01	5.25	2.71	6.08	3.61	4.28	4.9
W5c23243|c0_g2_i4	0.48	0.42	0.24	0.15	0.24	0.31	0.48	0.91	1.13	0.34	0.32	0.58	1	0.81	0.34	0.78	0.45	0.52	0.61	0.41	0.64	0.8	0.45	0.53	0.36	0.81	0.56	0.56	0.32	0.18	0.78	0.57	1.34	0.8	0.81	0.78	0.54	0.2	0.38	0.26	0.38	0.96	0.28	0.55	0.29	0.57	0.23	0.74	0.78
Contig10827	0.7	0.06	0.11	1.26	0.72	0.57	7.08	2.91	111.67	5.52	2.31	21.8	14.88	7.78	14.97	12.37	5.8	42.31	2	5.3	2.8	10.62	10.34	4	8.91	2.99	6.1	12.85	12.31	0.71	8.21	9.75	2.72	6.4	0.86	3.79	52.09	6.74	7.36	49.75	6.03	0.44	17.71	25.95	24.89	26.29	18.13	22.92	53.31
Contig36028	0.15	0.5	0.06	0.38	0.13	0.25	1.26	0.12	0.29	0.59	3.87	1.17	0.23	1.52	0.6	2.7	2.14	1.68	0.36	1.96	0.55	0.73	1.38	0.17	0.32	0.56	3.15	0	2.15	0.98	0.73	1.15	0.98	0.76	0.72	0.06	0.39	2.04	0.55	14.68	0.64	0.62	0	1.6	0.46	0.22	6.76	0.48	10.85
Contig34362	0.1	0.75	0.58	2.82	0.68	0.99	9.89	5.92	142.59	8.25	4.54	29.41	31.81	13.89	23.83	13.76	7.95	68.2	3.71	8.86	7.34	18.2	25	9.82	12.16	11.53	11.4	19.87	20.21	1.22	18.3	17.21	2.83	14.04	2.86	8.11	95.17	11.65	13.15	134.55	7.86	6.1	28.29	34.06	45.41	38.42	33.1	37.5	94.38
W1a13383|c0_g1_i2	0.51	0.1	0.35	0	0.18	0.23	1.32	0.33	0.8	0.18	0.95	0.99	3.78	1.53	0.45	0.58	0.2	0.1	0.62	2.79	0	1.67	0.69	2.49	0.37	0.1	0	0.43	4.74	3.2	0.45	1.27	3.8	1.24	1.18	0.42	0.4	0.36	0.13	0.37	0.55	0	0.28	0.12	0.21	1.36	0.39	0.54	0.17
Contig17070	0	1.71	0.23	0.12	0.08	0.43	0.18	13.26	0.81	4.53	30.18	9.11	8.75	6.68	1.38	20.93	6.89	4.69	2.71	2.09	1.6	0.45	4.58	3.78	46.05	9.77	27.64	29.23	15	5.24	0.25	10.41	0.68	8.79	4.23	24.16	0.6	5.86	23.81	2.88	2.12	0.77	2.45	23.29	20.87	4.69	4.21	0.94	12.48
Contig6082	0.07	0	0.17	0.11	0.17	0.1	0.97	0.8	0.77	1.39	0.2	0.83	0.81	0.29	0.46	1.06	2.2	0.74	1.34	1.12	0.64	0.64	1.46	0.53	0.56	0.74	1.25	1.38	0.97	1.06	0.5	0.93	0.41	1.33	0.31	0.92	0.78	0.4	1.13	1.48	0	0.55	1.17	0.86	1.49	1.46	1.5	0.95	1.42
W1a6828|c0_g2_i1	0.86	0.55	0.69	0.94	1.25	0.86	0.97	1.93	3.62	0.92	0.84	1.55	1.11	1.83	1.33	0.93	1.71	1.06	1.6	1.58	1.36	1	1.01	1.07	0.91	1.79	1.82	2.57	2.04	1.4	2.27	1.49	1.61	1.81	1.27	0.71	1.75	1.73	1.63	1.43	0.74	1.92	1.18	1.72	1.55	1.03	1.98	2.39	1.4
Contig22340	0.4	0.31	0.24	0.14	0.6	0.34	1.65	1.42	0.96	1.97	0.76	1.53	1.25	0.22	1.33	1.43	2.73	0.91	2.01	2.45	1.52	1.19	1.85	1.89	2.15	1.49	1.28	2.18	1.47	2.18	1.46	1.63	1.45	0.66	1.84	2.18	1.61	0.64	1	1.78	0.65	1.69	1.5	1.98	1.89	2.53	2.02	1.57	2.46
W4a4920|c1_g2_i4	0.06	0	0	0.11	0.06	0.05	0.96	0	0.38	0.17	1.13	0.45	0.05	0.8	0	0	0.19	0.39	0.7	2.34	0.05	0	0	0.97	0.97	1.09	0.25	1.3	0.28	0.33	0.21	0.52	0.1	0.07	0.25	0	1.02	0.62	0	0.05	0.69	0.81	0	0	0.2	0.19	0	0.46	0.38
W3d6293|c0_g1_i7	0.43	0.17	0.3	0.17	0.25	0.26	0.85	0.45	1.29	0.5	0.64	0.63	0.39	0.48	0.76	0.38	0.74	0.76	0.71	0.85	0.73	0.36	1.62	1.22	0.61	0.49	0.57	0.44	0.31	0.44	0.5	0.65	0.39	0.42	0.93	0.76	0.64	0.99	0.51	0.42	0.31	0.55	0.21	0.37	0.63	0.75	0.7	1.15	0.77
W3d30963|c0_g1_i2	1.21	1.99	1.09	0.88	1.33	1.3	1.38	3.01	3.46	1.25	1.79	2.15	2.54	2.44	1.49	2.11	1.26	2.12	2.46	1.75	1.64	1.18	7.09	2.21	1.47	1.33	4.54	1.53	1.36	2.93	1.15	2.24	0.97	2.39	2.46	1.39	1.57	2.33	0.91	2.53	1.53	2.57	2.02	2.71	1.32	2.23	1.41	2.28	4.06
Contig38511	0.41	0.55	0.28	0.14	0.85	0.45	0.73	5.03	6.06	0.94	4.09	3.21	3.1	1.38	2.7	7.75	2.52	0	2.38	3.46	3.81	5.02	6.47	2.19	2.18	3.86	0.79	1.04	1.76	10.32	2.6	3.33	1.4	2.5	0.79	4.69	0.98	2.32	7.07	1.44	1.24	4.58	0	3.13	7.13	6.59	4.51	6.93	4.3
W7b15600|c0_g1_i2	0.33	0.23	0.18	0.11	0.4	0.25	1.21	0.57	0.42	0.62	1.49	0.73	0.71	1.38	0.52	0.15	0.33	0.56	0.37	0.35	0.94	0.33	1.37	1.14	0.37	0.78	0.38	0.23	1.04	0.68	1.57	0.69	0.5	0.56	0.32	1.06	0.52	0.59	0.64	0.76	0.46	0.51	0.63	0.55	4.64	2	1.37	0.99	0.61
W4a14795|c1_g1_i3	1.52	0.99	1.34	2.72	2.46	1.81	19.8	8.13	14.47	8.55	12.86	12.43	13.08	7.36	7.64	34.18	15.21	10.38	4.12	18.85	16.77	5.35	4.81	18.76	30.31	10.3	23.24	18.25	11.81	9.33	9.6	14.18	15.98	15.57	7.29	8.53	9.29	7.69	19.2	5.8	4.75	5.35	4.73	10.98	11.73	25.77	18.53	16.42	64.96
W6b12659|c0_g1_i2	1.32	0.98	0.77	2.17	1.12	1.27	9.18	5.88	6.43	6.98	5.18	6.62	6.04	7.94	5.96	26.86	9.87	6.75	5.23	7.66	7.54	3.58	4.25	15.05	7.09	11.22	29.65	10.59	4.02	22.31	8.6	10.54	4	3.52	2.78	11.99	3.26	3.67	9.3	83.4	2.37	3.4	2.1	3.05	6.04	23.17	6.19	9.72	40.14
W3d6293|c0_g1_i5	0.39	0.38	0.39	0.19	0.53	0.37	0.8	0.75	0.94	0.85	0.72	0.71	0.61	0.37	0.89	0.56	1.45	0.78	0.45	1.04	0.83	0.5	1.78	1.22	1.1	0.49	0.63	0.81	0.53	0.42	0.64	0.79	0.41	0.55	0.86	0.78	0.86	0.73	0.51	0.43	0.47	0.88	0.75	0.81	0.68	0.87	0.56	0.89	1.08
Contig6628	7.93	2.74	3.18	5.12	4.54	4.7	12.09	9.45	39.57	17.29	28.27	22.38	27.16	17.97	33.47	11.91	97.52	25.06	24.96	22.74	19.27	20.52	25.65	37.15	16.39	12.46	23.91	34.11	22.61	17.67	25.84	27.18	10.88	27.58	8.37	10.99	16.81	10.72	18.49	75.35	12.47	12.98	4.32	14.44	20.87	27.11	110.34	73.14	196.35
Contig42437	3.19	2.62	3.72	3.33	1.89	2.95	6.79	8.84	12.2	9.63	28.43	12.35	19.42	5.52	11.66	16.67	19.72	2.42	10.44	23.47	16.49	19.81	6.54	15.27	12.08	11.79	12.88	9.83	19.48	29.26	8.27	14.26	11.94	4.49	6.94	17.28	17.34	9.89	20.92	2.3	9.78	10.54	7.22	14.79	30.24	21.04	37.19	12.34	23.32
W1a18194|c0_g1_i2	2.71	2.58	1.34	1.1	3.2	2.19	1.91	1.87	10.34	1.95	7.45	6.47	4.89	9.84	5.66	3.21	6.28	2.47	4.21	4.85	6.59	8.58	1.6	4.2	7.14	4.12	3.62	7.46	2.55	12.04	5.97	5.54	3.02	3.1	5.26	4.38	7.79	5.42	3.46	8.37	1.25	8.61	3.41	2.3	2.49	6.98	7.84	7.02	11.61
W3d30339|c0_g1_i1	11.99	17.17	12.16	12	11.2	12.91	21.14	21.6	43.67	26.35	20.73	24.48	22.76	31.73	26.07	19.67	26.42	31.57	24.55	23.21	20.93	17.29	34.08	16.39	22.28	26.26	28.16	27.46	20.82	33.44	19.55	24.88	15.69	22.01	25.97	29.11	21.87	23.3	19.67	30.16	17.14	16.81	21.22	23.22	29.32	37.58	22.38	35	39.36
W6b28798|c1_g1_i1	1.45	0	0	0	0.19	0.33	4.11	0	0.22	0.1	0.58	0.83	0	1.19	0	0.64	6.32	0.23	0.14	0.51	0.09	0	0	0.39	0	2.42	0.54	3.01	0	0.11	0.37	0.84	0.26	0	0.11	0.19	0.15	0	0	2.46	0	0.31	0.31	1.07	0.93	1.16	1.29	0.19	0.04
Contig19080	0.47	0.62	0.18	0.07	0.04	0.28	0.09	1.55	0.38	0.65	0.67	0.58	0.47	1.03	0.19	1.03	0.98	0.18	0.36	0.29	1.33	0.75	0.29	0.5	2.44	0	0.45	0.25	0.6	0.79	0.38	0.65	0.27	0.18	0.87	0.25	0.23	0.88	0.16	0.09	0.19	0.18	0.47	1.34	0.22	1.28	0.22	0.89	0.48
W6b25147|c0_g1_i5	1.66	0.62	0.33	0.88	0.56	0.81	0.89	1.36	0.88	2.16	2.67	1.44	1.39	1.02	0.8	1.59	1.4	3.16	3.57	1.17	1.46	1.82	0.38	0.9	1.01	0.97	0.86	1.19	1.04	0.78	0.28	1.31	0.7	0.78	1.36	0.85	1.02	0.79	0.16	2.35	0.69	0.72	0.53	0.92	0.66	0.38	1.64	2.47	1.02
W7b25604|c0_g1_i1	0	0.57	0	0.13	0.13	0.17	1.18	0.24	0.58	0.79	0.31	0.62	1.26	0.53	0.13	0.57	1.03	1.67	1.43	0.68	0.6	0	0.29	0.35	0.21	0.28	0.57	0.25	0	0	1.3	0.59	0.69	0.3	1	0.25	0	0.52	0	0	0	0	0	0.53	2.15	0.88	1.9	0.74	0.34
W2b29958|c0_g1_i8	0.08	0.73	0.1	0.48	0.46	0.37	0.64	0.48	0.61	1.74	0.96	0.82	0.63	0.52	3.29	0.51	0.7	1.73	0.41	0.19	1.1	0.34	1.42	0.42	0.24	0.34	0.81	0.33	2.12	0.17	0.98	0.86	0.11	0.57	0.92	0.81	0.74	0.22	0.66	0.39	0.21	0.31	0.62	1.17	0.76	1.04	2.62	0.56	0.81
W7b10072|c0_g1_i3	1.53	1.89	0.87	1.35	1.36	1.4	1.46	2.52	1.55	3.36	1.16	1.88	1.67	1.57	1.16	3.31	0.81	4.37	1.7	1.08	1.12	1.68	0.61	2.06	1.25	2.65	3.17	1.32	2.13	1.23	2.33	1.85	0.69	2.7	0.88	0.84	1.34	1.79	1.29	1.03	2.86	2.19	1.35	0.43	5.19	1.51	0.84	1.87	1.04
W3d1697|c0_g1_i2	1.03	0.36	0.44	0.38	0	0.44	1.84	1.03	1.09	0.92	1.15	1.03	0.8	1.18	0.66	1.91	1.25	0.61	1.07	1.01	1.45	0.89	4.03	0.52	0.21	1.25	0.64	0.93	0.05	0.15	0.57	1.01	0.11	1.2	2.21	0.43	0.29	0.65	1	0.05	0.4	1.44	0.1	1.41	1.3	1.65	0.47	0.64	0.83
W7b22183|c1_g1_i1	0.18	0.51	0.46	0.61	0.46	0.44	0.65	1.31	1.11	0.68	0.43	0.8	0.37	0.21	1.74	0.34	0.71	0.24	0.14	2.37	0.44	0.32	0.64	2.28	1.24	0.28	1.37	0.75	1.8	0.6	1.37	0.91	0.14	0.48	0.4	1.38	0	0.42	0.66	0.44	0.64	0.5	1.22	0.28	5.96	0.53	0.68	0.61	0.82
Contig42655	1.6	0.56	1	1.01	0.19	0.87	1.67	0.66	0.79	1.55	0.53	1.25	1.63	3.49	0.78	4.11	0.65	0.67	0.62	2.17	1.25	2.55	2.35	0.51	0.63	1.1	1.19	1.48	0.43	0.59	1.2	1.44	0.34	0.97	1.06	0.67	0.96	1.48	0.9	2.25	0.79	0.2	0.4	0	3.48	2.5	0.56	3.7	3.83
Contig5648	0.79	0.07	0.06	0.31	0.5	0.35	0	0.59	0.29	1.03	1.51	1.48	3.42	1.22	2.13	0.76	1.08	0.15	1.4	0.41	2.01	1.03	3.04	0.84	1.36	1.5	0.28	1.34	0.48	0.66	1.75	1.31	0.28	0.3	0.07	1.44	0.86	0.9	1.43	0.64	0.08	0.91	0.5	0.78	1.13	1.62	1.76	1.48	1.7
Contig11411	0.22	0.11	0.24	0.28	0	0.17	1.92	0.72	1.84	1.12	1.32	1.28	1.7	1.17	2.01	3.89	3.06	7.4	0.93	2.08	0.9	1.93	1.29	0.51	0.63	0.83	0.79	1.72	0.98	0.5	0.54	1.73	0.09	0.28	0.42	0.68	0.51	0.49	0.81	0.32	0.48	1.46	1.59	5.79	2.23	0.74	0.78	2.4	10.03
W3d23238|c1_g5_i1	0.17	0	0	0	0	0.03	0	0.86	0	1.09	9.11	1.9	4.47	1.87	0.62	1.51	4.35	1.26	0	0	0	0	2.22	0.41	3.53	1.49	1.52	0	0.39	0.18	0	1.25	0	0.54	0.51	0.44	0	0	1.08	0	0.76	0	0.96	4.19	1.45	1.3	2.69	0.2	0.93
Contig21845	1.03	0.76	0.73	0.99	0.89	0.88	1.33	1.64	1.02	1.67	2.2	1.64	1.92	2.1	1.89	1.91	2.17	1.56	1.61	2.15	1.63	1.19	1.71	1.34	1.61	1.49	1.34	0.92	0.9	2.09	0.73	1.59	0.85	1.3	1.29	1.01	2	0.59	1.2	2	1.11	0.85	1.66	1.38	1.82	0.81	2.64	3.26	1.8
W4a4920|c1_g2_i3	0	0	0.05	0	0.27	0.06	1.3	0.25	0.06	0.33	1.55	0.58	0.1	1.49	0	0.12	0.12	1.02	1.65	1.63	0.05	0.07	0	0.94	1.65	1.81	0.42	2.82	0.96	0.19	0.14	0.8	0.1	0.06	0.24	0.15	1.31	0.22	0	0.09	0.6	1.82	0	0	0.71	0.74	0	0.88	0.45
W2b22083|c0_g1_i1	0.49	0	0.42	0.42	0	0.27	1.14	0	0.65	3.63	0.51	0.99	1.26	0	2.18	1.25	0	0.84	6.33	0.94	3.2	0	1.12	0.95	0.35	2.93	0	1.66	0	1.16	0.18	1.28	0	0	2.05	0	1.52	1.88	0.61	0	0.88	0	0	0	0.51	3.9	0	1.23	0.54
W1a4497|c0_g1_i2	0.74	0.5	0.38	0.52	0.44	0.52	0.81	1	1.98	0.81	0.42	1.58	0.83	1.16	3.12	2.5	8.44	0.09	1.27	2.54	0.84	2.26	2.88	3.55	1.19	2.06	3.56	2.18	0.74	1.76	1.89	2.26	1.28	0.95	1.16	2.13	1.06	1.26	0.71	1.97	0.23	1.06	1.18	0.96	2.02	2.76	3.44	1.06	6.72
W3d1697|c0_g1_i1	1.03	2.28	0.25	0.06	0	0.72	0.22	1.15	1.31	1.11	8.98	2.13	2.51	1.97	1.91	4.09	1.54	0.99	2.5	0.76	1.87	1.21	4.25	0.77	0.21	1.32	1.85	0.87	0	7.13	4.86	2.14	0.34	2.86	1.5	2.15	0.29	0.72	1.46	0.05	0.24	2.89	0	3.62	1.53	6.82	1.23	1.09	0.41
Contig16639	0	0	0	0	0	0	0	0.41	0.67	0	0	0.18	0	0	0	0	0	0	0	0	0	0	0	0	10.94	0	0	0	0.25	0	1.85	0.69	0	0.17	0.33	0	0	0	0.42	0	0	0	0	0	0	0.25	0	0	0.11
W7b8678|c0_g2_i1	0	0.19	0.17	0	0.17	0.11	0.4	0.66	0	0.36	0.21	0.31	0.31	0.89	0.18	0	0.4	0	0.49	0.23	0.49	0.22	0.39	0.7	0	0.76	0.96	0.34	0.59	0.2	0.66	0.41	0.31	0	0	0.17	0	0.36	0.99	0	0.22	0.56	0	0.72	0	0.3	1.28	0.28	0.4
W7b26603|c0_g2_i2	1.09	2.02	3.32	0.75	1.35	1.71	3.64	1.5	4.68	2.79	1.09	2.41	3.28	3.04	1.42	4.1	7.53	1.59	0.99	1.51	2.61	3	1.16	2.02	4.27	1.21	2.41	0.81	1.28	6.12	1.25	2.61	1.28	3.58	1.76	1.71	1.75	1.74	1.58	1.27	1.58	2.81	2.7	3.11	12.93	1.97	1.64	6.35	3.74
W4a5916|c4_g1_i1	0.37	0	0	0.32	0	0.14	0.37	2.1	0.18	0.33	1.91	0.88	0.85	0.81	0.16	0	0	0.38	0.89	0.84	0	0	1.25	1.07	63.5	0.35	3	0.15	0.68	3.17	0.4	4.08	0	0.75	0	4.87	0	1.95	1.58	0.67	0	0	0	5.7	0.19	0.27	0.23	2.41	1.09
W4a19369|c0_g1_i4	0.12	0.29	0.1	0	0.21	0.15	0.3	0.9	0.3	0.54	1.84	0.77	2.13	3.58	0.22	1.52	0.18	0.69	1.26	0	0.1	0.33	0.42	2.14	1.45	0.17	3.7	0.31	0.45	1.61	0.47	1.09	0.67	0.44	0.29	1.01	0.4	0.7	0.23	0.49	0.92	0.34	1.01	5.91	0.13	4.55	2.03	3.27	0.59
W3d30258|c0_g1_i2	3.73	1.8	1.33	0.54	0.27	1.53	5.43	6.76	0.92	6.22	3.08	3.93	4.34	2.35	3.75	4.47	24.46	1.76	1.7	4.63	4.45	2.73	5.32	0.91	2.8	1.76	3	5.52	4.15	3.96	8.03	4.74	1.7	1.11	1.35	4.01	3.09	0.97	2.31	16.36	2.52	0.44	1.07	1.12	3.07	3.48	2.99	4.22	12.87
Contig35321	1.37	0.7	0.92	0.49	1.26	0.95	2.65	1.32	0.82	2.05	1.45	1.58	1.85	1.57	1.87	1.26	1.6	2.01	1.43	1.94	1.95	1.38	1.57	2.07	0.93	1.6	1.24	2.02	1.41	1.34	1.27	1.59	1.82	1.37	1.43	1.11	0.68	0.83	1.13	3.61	0.55	0.75	0.92	1.12	1.73	2	3.17	1.52	2.72
W4a27574|c0_g1_i4	0.06	1.15	0.39	0.34	0.39	0.47	0.62	0.93	0.78	0.91	1.12	0.79	0.48	0.66	0	1.14	0.79	0.23	0.62	1.04	0.42	0.93	1.39	0.27	2.82	0.27	0.44	0.48	0.8	2.71	1.56	0.9	0.49	0.41	0.71	1.04	0.83	0.35	0.42	0.25	0.43	0.48	1.09	0.14	0.94	0.42	0.58	2.44	0.32
W0d24097|c0_g1_i1	7.11	0	13.56	13.8	25.59	12.01	0.16	35.41	3.13	125.89	11.04	35.09	89.72	31.51	72.08	49.67	2.68	14.16	0.58	44.94	1.68	10.4	88.41	0.18	25.09	1.79	0.76	7.49	65	19.81	54.04	30.53	28.37	22.93	20.35	0.13	0.21	3.51	39.48	26.86	28.06	16.38	0.44	11.74	26.79	24.08	39.58	13.81	22.24
W6b11590|c0_g1_i1	0	1.95	1.6	0	0.67	0.84	431.57	7.13	0.61	53.08	0	82.12	3.49	0	90.8	0.3	6.33	0	65.09	1435.57	0	36.57	92.52	1.09	594.22	0.15	0.75	6.3	3.68	0	0	122.99	0.85	1.43	0	2.97	0	0	0	408.08	19.47	0	0.85	329.94	4.68	4.17	1.2	0.52	2.67
W6b6138|c0_g1_i1	1.83	1.42	1.32	1.65	1.23	1.49	1.89	2.96	1.73	1.58	2.74	2.2	3.19	1.46	2.21	3.02	2.2	0.92	1.48	3.82	2.4	2.54	2.09	2.61	1.41	1.79	1.67	2.92	2.58	2.84	2.41	2.29	1.43	2.04	1.51	1.49	1.69	2.07	2.05	5.12	1.45	1.56	2.09	1.08	1.74	3.22	2.97	1.7	4.23
W6b9822|c0_g1_i3	1.83	1.11	1.47	1.09	2.19	1.54	2.52	1.03	2.83	3.77	4.9	2.87	3.82	3.26	2.25	3.18	4.22	3.3	2.36	3.68	2.34	2.39	2.13	3.21	1.32	0.98	3.09	3.3	2.13	2.57	3.02	2.77	2.06	1.87	2.33	1.33	3.04	2.54	1.56	2.19	1.49	3.21	2.37	3.71	1.67	3.59	4.56	2.73	3.22
Contig23070	0.52	3.09	1.23	0.41	0.21	1.09	15.72	53.21	7.86	2.24	12.21	15.25	39.33	204.84	0.36	0.77	0.96	3.62	1.21	45.55	26.54	2.67	46	0.89	25.61	0.57	60.22	155.47	6.53	0.61	30.01	34.3	41.27	29.97	0.12	17.76	20.84	2.41	0.44	2.65	0.17	0	0.5	0.86	90.81	131.69	4.52	6.5	63.91
W2b3386|c0_g1_i1	0	0.15	0.13	0	0.61	0.18	0.62	1.35	0.62	0.62	1.79	0.86	0.3	1.04	1.32	1.72	0.31	0.48	0.28	1.07	1.21	0.51	0.15	1.83	0.62	1.03	2.26	0.4	0.7	0.8	0.34	0.86	0.73	0.32	0.08	0.65	0.21	0.42	0.68	1.03	0.68	0.55	0.11	1.31	0.49	0.58	1.71	1.29	1.81
W4a6112|c0_g1_i1	0.31	0.27	0.26	0.2	0.33	0.28	0.77	0.78	0.08	0.73	0.51	0.5	0.5	0.25	0.18	0.39	0.51	0.37	0.84	0.59	0.25	0.45	0.38	0.33	1.81	0.56	0.27	0.28	0.15	0.76	1.07	0.52	0.24	0.58	0.35	0.4	0.44	0.09	0.41	0.17	0.3	0.72	0.53	0.15	0.4	0.54	0.3	0.42	0.58
Contig43309	0	0.26	0.31	0.16	0	0.15	7.02	1.48	2.5	2.33	2.35	2.71	2.8	10.6	0.08	1.21	0	1.3	1.09	0.62	4.5	5.64	0.09	15.6	1.89	1.45	2.44	1.07	2.75	1.1	13.89	3.59	20.07	0.46	0.96	4.2	0.12	0.32	0	0.27	0.68	1.77	2.49	14.71	15.95	1.21	0	1.87	0.21
W0d10974|c0_g2_i1	1.75	0.8	1.3	2.19	1.15	1.44	1.95	1.52	2.99	3.6	0.97	2.14	3.33	2.6	2.09	1.54	3.59	1.26	1.95	1.17	2.79	1.02	0.95	2.74	1.55	2.35	5.03	1.77	1.12	1.19	2.68	2.14	1.64	2.14	3.78	1.62	1.94	1.34	0.54	2.01	2.22	1.91	1.81	1.4	1.83	1.6	2.88	1.56	2.28
W4a28084|c0_g1_i2	1.08	0.55	0.78	1.43	0.99	0.97	1.99	1.45	1.35	2.12	1.96	1.85	1.63	2.48	2.23	2.4	2.61	1.23	2.62	2.81	1.58	1.37	1.56	1.4	1.93	1.94	1.48	1.68	1.06	1.85	1.56	1.86	1.24	1.86	0.83	1.8	1.51	0.71	1.9	2.51	1.85	1.67	1.65	2.18	2.66	1.1	3.73	3.06	2.17
W4a17057|c0_g1_i1	0	0.14	0	0.12	0	0.05	0	0	3.77	0	0.59	0.73	2.52	0.5	0	0.27	0.84	0	0	0.16	0.46	0	0.28	0.83	1.43	0	0	0	0.1	0.14	0.16	0.4	0	0.29	0.14	0	0	0.38	0.35	0.1	0.31	0.4	0	0.51	0	0.84	0	0.12	0.14
W2b22957|c0_g1_i1	0.13	2.47	0.81	0	0	0.68	92.16	17.23	0.8	177.45	0.14	48.01	3.34	0	757.86	0.26	7.24	0.14	158.21	115.9	0.11	33.66	169.8	1.89	57.31	0	0.78	4.1	5	0	0.44	69.26	0.32	1.38	0	1.34	0	0	0	38.33	26.23	0	1.85	31.46	14.14	6.63	3.46	0.23	2.14
W4a5916|c4_g3_i5	0	0	0	0	0	0	0	0.57	0.35	0.62	3.88	0.99	0.18	0	0	0.67	0.58	0.48	0	0.27	0	0	0.11	0.82	10.84	0.99	3.59	1.48	0.52	0.12	0	1.09	0	0.71	0.23	0.58	0	0.1	1.15	0	0	0	0.16	1.12	0.48	0.52	0.15	0	0.62
Contig13773	0	0	0.58	0	0.2	0.16	0	1.21	18.05	1.21	7.09	4.71	3.61	1.21	5.57	0.11	0.34	4.2	5.09	2.34	2.78	0.87	3.44	2.25	1.8	0.86	7	2.4	0.84	0.46	3.37	2.55	1.24	0.81	1.98	0.75	0.9	0.7	1.82	1.84	0.49	0.32	0.78	0.27	8.61	5.08	3.2	0.98	3.64
W4a11119|c0_g1_i5	0.24	0.61	0.84	0.59	0.64	0.58	1.12	0.4	0	0.82	1.12	0.98	1.93	0.3	0.61	2.1	0.73	0.95	1.01	0.67	0.24	1.34	0.52	0.57	3.03	0.18	0.89	0.21	0.87	0.4	0.43	0.89	0.65	0.95	0.85	0.53	0.58	0.39	0.6	1.58	1.27	0.07	0.54	0.23	0.15	0.66	1	0.79	1.41
Contig15049	0	0.2	0.2	0	2.05	0.49	0	0	285.61	67.18	25.54	63.06	0	55.45	0	30.94	0	675.06	0	0	83.9	48.43	91.31	0	2.5	0	42.1	0.07	0	0	19.57	55.23	0	16.56	0	11.6	0.67	23.32	0	0	23.78	7.25	0	0	8.84	46.58	0	0.01	11.64
Contig32705	4.82	4.63	1.68	2.81	0.82	2.95	54.07	21.68	11.09	31.59	28.14	25.74	12.81	10.09	8.32	3.72	278.87	87.87	5.18	7.46	12.51	7.02	66.46	127.65	4.4	7.93	62.38	7.42	6.04	4.16	9.49	38.41	2.2	31.15	12.04	3.05	3.88	4.67	7.67	37.21	2.57	1.51	4.9	0.53	9.15	12.11	33.99	34.66	44.67
W5c30044|c1_g1_i5	1.12	0.5	1.08	0.4	0.69	0.76	0.79	1.34	0.6	1.2	2.87	1.34	0.43	0.75	1.37	1.21	1.25	1.11	1.08	2.09	0.95	1.54	0.82	1.31	0.67	0.71	1.53	1.3	0.87	2.38	0.97	1.18	3.97	0.62	1.27	0.66	1.18	0.79	0.69	0.45	0.96	1.31	0.39	1.29	0.87	0.84	1.44	1.14	2.6
Contig43043	0.34	0.07	0.32	0.12	0.39	0.25	6.8	9.43	1.31	10.24	21.89	9.88	5.97	4.91	6.9	5.52	12.12	19.16	3.02	9.34	6.41	4.52	3.33	4.98	3.2	3.55	9.33	7.04	4.28	6.35	2.66	6.45	2.02	5.26	3.5	3.4	3.66	1.63	3.92	6.19	0.96	1.34	1.69	6.17	8.51	11.25	5.87	12.98	13.37
W1a4772|c0_g4_i1	1	0.39	0	0	0	0.28	0	0.33	2.57	11.38	0.83	3.05	0.93	1.78	1.25	1.73	2.59	0	0	2.98	6.55	0.44	0	1.4	0	3.78	8.49	1.18	0	6.73	3.3	2.27	1.41	0.41	0.39	2.5	0.53	0.18	3.46	0	2.6	0	1.65	0.96	1.87	6.57	0.51	0.56	0.86
W4a21111|c0_g1_i4	0.15	0	0.06	0	0	0.04	1.71	0.37	0.59	0.26	2.56	0.93	0	2.06	0.13	0	0.15	0.38	2.35	1.2	0.12	0.08	0.07	1.57	1.56	1.9	0.5	2.58	1.55	0.15	0	0.86	0.17	0.08	0.5	0	1.38	0.07	0.18	0.16	0.48	1.77	0.1	0	0.39	0	0.1	0.56	0.39
W1a20994|c0_g1_i2	0	0.49	1.01	0.58	0	0.42	6.74	1.53	3.51	1.65	8.45	4.96	15.07	10.23	0	5.02	8.24	2.78	0	6.97	2.76	1.48	6.77	5.33	0.73	3.67	2.61	5.72	1.5	2.24	3.53	4.46	2.77	4.31	0.49	4.08	4.48	1.65	4.81	2.24	3.29	0.47	0	4.05	0.88	3.28	6.73	2.18	10.46
Contig33068	5.68	2.44	2.8	1.85	10.33	4.62	28.81	12.39	93.39	5.99	18.85	27.68	42.56	14.69	12.16	9.59	16.68	42.34	54.09	45.9	8.07	6.7	5.32	16.74	12.29	13.28	1.69	37.79	6.62	23.61	23.16	20.7	12.33	10.22	6.97	7.42	12.53	21.01	6.77	13.64	15.28	5.12	7.69	41.2	8.47	22.4	17.54	6.11	38.68
Contig28071	0.33	0.3	0.42	0.53	0.33	0.38	3.83	2.58	2.35	4.3	2.91	2.91	3.21	3.21	2.4	4.22	2.75	4.69	2.17	4.02	3.06	10.5	1.38	2.12	0.7	1.11	1.46	1.58	1.48	1.9	1.41	2.81	2.48	1.49	1.61	2.94	1.19	0.75	1.11	1.26	1.88	1.25	2.33	1.69	1.12	3.1	1.48	2.72	2.44
Contig20030	0	2.32	0.97	0	0.37	0.73	133.32	11.24	0.28	266.62	0	68.78	3.61	0.25	200.11	0.14	8.02	0	423.57	145.22	0.23	30.2	634.91	4.46	65.22	0.13	0.54	6.45	5.24	0	0.31	80.45	0.99	2.16	0	0.35	0.19	0	0.17	44.47	64.04	0	1.17	35.54	5.87	12.87	3.63	0.2	2.1
W4a26292|c0_g1_i2	0.52	0.69	1.02	0.39	0.35	0.59	2.35	0.59	2.43	1.21	0.96	1.34	0.56	0.64	0.24	0.83	2.12	0.51	0.21	0.82	3.06	0.9	0.8	1.16	7.05	1.64	2.15	1.09	0.7	1.31	0.79	1.4	0.33	0.84	0.6	0.8	0.79	2.53	0.74	0.49	0.97	0.63	1.78	0.89	0.44	1.56	1.31	1.31	0.7
Contig40151	0.34	0.49	0.29	0.15	0.29	0.31	0.85	0.56	1.09	1.05	0.88	0.78	0.53	0.45	1.28	0	0.59	0.44	0.82	1.55	0.35	0.65	0	1.88	0.86	1.12	0.82	0.79	0.94	0.95	0.09	0.74	0.4	0	1.23	0.42	0.45	0.83	0.21	0.56	0.28	1.07	0.12	0.41	3.26	2.53	0.44	0.31	1.12
Contig17071	0	0.12	0	0	0	0.02	0.06	1.23	0.12	0.83	6.45	1.66	0.78	0.56	0.33	0.9	0.93	0.84	0.23	0.07	0	0.07	0.49	1.46	15.62	0.18	2.47	5.77	1.07	0.13	0.07	1.68	0	0.51	0.3	1.46	0	0.44	1.7	0.37	0.2	0.09	0	0.6	1.11	1.59	0.64	0.04	1.55
W5c5540|c0_g1_i1	0.82	0.53	1.29	0.83	0.48	0.79	2.32	1.68	2.3	1.09	2.71	1.73	1.17	0.97	1.47	3.41	2.04	0.85	1.49	2.04	0.45	3.9	1.74	1.28	2.17	0	0.66	0.93	1.22	1.12	1.81	1.51	2.67	2.24	0.66	0.57	1.09	0.61	0.17	1.21	0.44	1.15	0.75	1.15	1.28	2.45	2.11	1.46	1.77
Contig45283	0	0	0	0.32	0.32	0.13	1.83	0	0.36	4.55	0	1.12	0	0.33	0	0	0	0.19	0.22	0	0	0	0	0.43	0.53	15.4	2.29	0	1.22	0	2.41	1.21	0	0.19	12.04	0	0	0	0	0.27	0	0.51	0	0.66	4.95	2.19	0	13.32	0
W4a8916|c0_g1_i1	0.57	0.37	1.72	0.99	0.17	0.76	4.28	1.02	0.47	2.63	1.39	1.88	0.96	1.19	0.68	1.46	1.52	1.86	0.92	2.73	1.32	1.46	1.96	1	1.44	0.99	1.56	2.34	1.13	1.16	0.1	1.36	2.08	0.68	1.01	1.82	0.89	0.51	1.18	1.47	0.31	1.87	0.66	0.69	1.39	1.42	1.71	2.05	3.41
W1a23343|c0_g1_i2	0.36	0.2	0.19	0.16	0.38	0.26	0.36	0.47	0.47	0.42	0.57	0.67	0.74	0.61	0.22	0.59	0.66	0.66	0.47	0.52	0.35	0.2	0.4	0.58	0.56	0.54	0.64	0.9	0.52	0.58	0.3	0.53	0.35	0.42	0.46	0.42	0.36	0.2	0.22	0.57	0.59	0.92	0.44	0.93	0.73	1.19	0.88	0.72	0.77
W6b3234|c0_g1_i1	0	0	0	0.15	0	0.03	0	3.51	0.34	0.46	0.89	0.99	0	0.76	0.76	0.98	0	0.88	0.42	0	2.8	0	1.34	0.8	0	0	1.98	1.16	0	0	0.75	0.66	1.07	0.17	0	0	0.45	0.15	0.42	0.76	0.56	0	0	0.41	0	1.28	0.22	2.2	0.96
W1a27156|c1_g2_i1	0	0	0	0	0	0	0.56	0.15	0	1.51	2.35	1.26	1.31	0.67	1.01	0.72	1.69	1.36	2.28	0.65	0	0	0.18	0	0.27	0	1.09	0	0.56	1.73	0	0.71	0.44	0	0.73	0.16	0	0	0.7	0.83	1.02	0.79	0	1.13	0.98	0.56	0.48	0.68	1.43
W6b26031|c0_g1_i1	0	0	0	0	0.35	0.07	1.79	0.65	0	1.06	2.28	1.17	0.77	0.89	0	0.19	3.17	38.09	0	0	0	0	0.58	0.46	0.14	0.19	2.3	0	0	1.22	0	2.53	0.16	0.81	0	0	0	0	1.23	1.02	0	0.28	0.27	1.43	0.83	1.78	1.02	0.67	0.46
W7b17730|c0_g1_i2	0.91	1.47	1.22	0.35	0.71	0.93	1.42	1.5	1.71	1.72	1.38	1.36	1.26	2.54	1.54	0.88	1.82	0.42	1.23	1.28	1.75	1	0.2	1.19	1.76	0.96	2.06	1.55	0.76	0.62	1.12	1.26	1.27	1.04	0.98	1.1	0.54	1.72	0.75	2.1	0.77	1.57	0.28	1.34	3.91	0.61	0.65	1.59	1.11
Contig8124	0.41	0.59	0	0	0	0.2	3.65	4.42	3.01	4.88	3.6	4.21	9.22	2.53	4.08	9.24	10.01	4.5	3.08	3.26	1	1.56	1.39	2.61	1.61	1.44	1.37	0.69	0.6	2.38	0.22	3.2	2.62	4.67	0.59	2.87	1.35	0	2.01	0.75	0.88	0.85	0	2.8	1.37	5.77	4.04	1.96	11.37
W2b14370|c0_g1_i2	0.43	0.5	0.49	0.16	0.21	0.36	0.71	0.82	1.31	1.06	0.89	0.83	0.59	0.68	1.78	0.18	0.76	0.29	0.29	0.98	0.39	0.16	0.46	0.89	0.38	0.94	1.46	0.72	0.28	0.29	0.63	0.64	0.56	0.63	0.32	0.71	0.25	0.38	0.7	0.31	0.98	0.53	0.85	0.46	0.59	1.28	0.49	0.61	0.9
Contig22605	0.06	0.28	0.24	0.29	0.32	0.24	1.42	0.92	0.42	1.6	0.76	1.18	0.33	0.71	0.74	0.72	0.78	1.37	0.28	0.7	0.62	0.6	0.24	0.75	0.71	0.52	1.24	0.6	0.89	0.69	1.12	0.72	0.5	0.47	0.55	0.78	0.48	0.31	0.29	1.98	0.17	0.61	0.82	0.66	2.29	1.04	1.04	1.01	1.43
W1a8166|c0_g1_i1	0	0.79	0	0	0	0.16	0.61	0.84	0	0	1.27	1.64	5.21	6.71	0	0	0	0	0	3.04	0.67	0	0	1.43	0	0.77	0.39	0.69	0.15	0.42	0	1.03	0.95	0	0	0.17	6.22	1.45	0	0.15	0.44	0	0	0	0	0	2.36	2.28	1.08
W7b14444|c0_g1_i1	4.47	4.13	13.74	4.47	8.83	7.13	18.36	7.83	8.85	17.94	18.76	13.69	15.19	26.29	26.36	7.91	17.92	21.2	8.32	13.45	3.42	6	6.42	3.25	5.17	20.31	19.65	6.98	3.76	11.04	6.01	12.03	3.65	8.63	9.92	5.63	16.23	9	11.81	6.95	16.68	5.01	7.26	11.68	8.79	4.16	14.18	14.17	10.4
W3d5442|c1_g1_i1	2.23	0.69	0.77	2.78	5.36	2.36	13.27	1.32	18.27	18.8	67.92	22.66	12.87	5.56	11.87	4.96	1.07	0.64	12.67	90.56	16.35	0.78	9.16	4.8	5.6	34.69	6.45	3.62	4.44	2.82	18.45	13.02	2.72	13.68	1.04	25.1	15.16	0.16	0.44	13.46	11.4	0.13	3.69	4.6	14.94	22.8	20.75	24.21	11.35
Contig35416	0.77	0.18	0.33	0.17	0.17	0.32	4.01	1.96	0.95	4	5.09	2.94	2.08	1.7	1.28	2.84	3.72	18.63	0.46	1.76	0.63	1.05	1.03	1.01	0.69	0.09	1.75	1.13	0.85	1.56	1.16	2.29	1.34	1.17	0.19	0.72	1.9	0.25	1.3	3.31	0.83	0.67	0.4	2.52	1.09	1.72	1.97	4.31	3.26
Contig5374	0.86	0	1.48	0	3.15	1.1	13.6	6.09	1.71	10.27	12.22	9.61	6.69	9.9	10.54	11.15	4.12	5.86	19.56	2.77	1.41	6.53	0.51	2.12	1.68	1.3	0.91	15.03	1.66	2.72	2.37	5.62	2.49	0.53	3.76	2.51	0.23	2.6	6.4	8.63	3.17	1.69	1.31	5.27	5.38	4.89	5.87	7.02	23.81
W1a20357|c0_g5_i3	0	0.37	0	0	0	0.07	0	0	0.19	14.98	0	3.86	1.35	49.98	0	1.67	2.89	0	0	0	0.16	0	0.95	1.58	0	0	0.37	2.29	0.14	370.08	0	22.71	0.91	0.79	0	0.16	0	0	0.24	0	0	0	0.27	0.23	11.28	0	0	0.11	0.58
Contig11475	14.85	10.19	9.16	1.18	17.89	10.65	60.14	37.85	8.48	36.55	21.65	30.51	58.72	30.53	116.96	29.28	18.54	17.05	19.13	34.56	7.17	6.22	17.2	21.08	61.16	16.15	14.29	117.7	49.18	12.79	15.14	34.89	1.25	17.81	9.98	18.57	11.19	18.09	16.84	7.7	11.06	3.4	9.53	2.54	19.8	94.57	44.9	5.71	32.83
Contig33723	0.19	0.18	0.16	0.25	0.5	0.26	0.19	0	0.19	0.26	1.4	0.54	0.37	1.19	0.68	0.83	0.19	0.2	0	0.22	0.31	0	0.75	0	0	0.36	0.92	1.62	1.21	0	0.63	0.5	0	0.2	1.85	0	0	0	0	0.77	0	0.67	0.13	0	0.3	1.14	0.12	0.13	0.29
Contig42865	0	0	0	0	0.17	0.03	0.58	0.12	0.24	0	1.47	0.4	0.08	0.35	0.09	1.49	0	0	0	0.28	0.36	0	0.19	2.16	0.63	0.32	0.28	0	0	0.79	0.11	0.38	0	0.05	0.09	0	0	0	0	0	0.26	0.27	0	0.7	1.77	0	0	0.11	0.18
W7b1343|c0_g1_i2	0.36	0.26	0	1.01	0.39	0.4	3.58	0	0.35	0.88	1.96	1.3	3.41	0.88	2.72	0.69	0.09	0.74	0.44	2.57	0.59	1.08	1.05	1.99	0.45	0.25	0.61	0.53	1.07	0.64	0.59	1.07	0.28	0.55	0.43	0.75	1.67	0	0.33	0.2	0.29	0.75	0.87	0.54	2.43	1.47	0.58	0.5	1.28
Contig20120	0	0	0.08	0	0	0.02	0.1	1.86	0.05	0.34	1.61	0.66	0.34	0.43	0.78	0.23	0	0.05	0.35	0.61	0.59	0.05	0.19	0.17	1.67	6.86	0	0	0.65	0	0	0.68	0.04	0	0.23	0	0.13	0.09	0.12	0.04	0.31	0	0	0.41	3.07	0	0	0.05	0.02
Contig39898	0.86	0.46	1.73	0.62	0.18	0.77	1.54	2.14	0.5	2.37	7.55	2.51	3.45	1.8	0.61	2.42	3.25	2.72	1.22	0.31	1.53	2.67	1.02	2.46	0.32	5.19	2.4	0.83	3.02	0.91	1.93	2	0.63	0.97	0.95	0.64	0.59	1.37	0.18	1.49	0.51	0.12	1.19	1.1	5.37	1.06	0.76	2.48	1.67
W2b6231|c3_g2_i3	0.47	0.11	0.48	0.33	0.53	0.38	1.75	1.58	0.2	1.14	2.31	1.22	1.83	0.26	4.72	1.2	0.29	0.33	2.13	2.08	0.07	0	1.09	1.95	0.17	0.52	1.27	1.26	1.17	0.39	3.02	1.25	0.34	0.75	0.23	0.39	0.5	0.52	1.16	0.39	0.28	0.61	0	0.91	0.18	0.48	2.4	1.59	0.71
Contig4136	0.31	0.15	0.4	0	0	0.17	0.62	0.51	0	4.32	1.13	1.35	3.11	1.03	3.23	0.15	1.38	0.16	1.5	2.65	0.82	1.18	0.75	1.44	0.06	1.02	0.15	0.39	0.46	0.47	1.53	1.13	0.3	0	0	0.06	0.61	0.96	0.19	0.11	0	0.65	0.64	0.37	1.28	0.46	0.4	1.73	1.23
W4a27000|c0_g1_i14	1.67	0	0	0.45	1.73	0.77	0.84	1.97	0.21	3.07	3.16	1.58	1.54	0.47	1.77	0.1	0.21	1.4	1.78	0.24	1.71	0.34	0.31	2.57	4.08	0.4	4.54	1.06	1.01	1.39	2.65	1.45	0.82	1.6	0.61	0.35	0	2.14	0.39	1.23	0.34	0.88	1.3	2.26	0.22	0.16	0.54	2.08	1.52
W2b8885|c0_g2_i6	0.16	0.67	1.19	0.09	2.23	0.87	0.69	1.71	3.38	1.71	0.56	1.37	0.58	1.24	3.05	0.92	0.85	2.25	0.52	0.49	1.31	1.93	0.68	1.56	2.31	0.45	1.03	1.49	1.43	0.6	0.53	1.22	1.13	2.56	0.88	0.71	0.28	0.52	1.19	0.63	0.98	0.37	1.62	0.96	0.39	1.04	1.03	0.87	0.37
Contig11643	0	0	0	0	0	0	0	5.46	0	0	0	0.91	0	0.57	33.37	0	0	0	0	0	0	0	0	0	7.57	0	0	0	0	0	0	2.18	0	0	0	0	2.34	0	0	0	0	0	0	0	28.14	0	0	0	0
W2b1009|c0_g1_i1	0	0.1	0	0	0	0.02	0.42	1.2	0.62	0.74	1.42	0.97	1.54	2.05	2.89	4.5	2.81	0.32	1.39	4.19	0.43	0.57	0.61	0.24	0	0.1	0.5	1.06	0.31	0.11	0	1.24	0.33	0.11	0.1	0.78	0.28	0	0.13	0.31	0.34	0	0.29	0	0	1.72	1.48	0.32	1.9
Contig6323	0.87	1.05	0.33	0	0.09	0.47	0	0.85	0.32	57.13	0.68	15.81	36.78	163.25	0.19	4.74	6.06	0.28	1.85	0	1.02	1.67	0.16	1.08	0	0.21	0.05	62.55	0.32	585.12	0	45.54	0.3	14.93	0.74	1.22	0.14	0.1	0.6	0	0	0	17.81	0.26	43.67	0.32	0.56	3.22	21.88
W1a18123|c0_g1_i1	0.15	0.22	0.07	0.46	0	0.18	2.06	2.07	1.97	1.7	1.59	1.85	0.65	1.63	0.48	0.88	36.02	0.55	1.11	3.42	1.31	0.17	5.61	10.46	0.06	0.14	14.52	0.06	2.04	0.08	0.5	4.2	0.54	1.95	0.59	0.13	0.3	0.54	0.85	0.06	0.33	0.21	0.95	0.73	0.16	0.34	2.26	5.61	2.73
W0d27061|c0_g6_i1	1.64	2.87	4.09	6.17	0.65	3.08	6.39	0.61	7.95	2.38	7.91	5.25	3.46	5.56	2.66	5.99	42.53	2.15	2.17	7	2.68	19.42	3.49	0.87	2.26	3.38	2.87	2.01	4.97	7.13	3.6	6.54	1.51	5.32	5.19	1.73	1.58	6.87	2.94	2.85	6.44	2.08	1.23	3.21	3.87	13.78	15.29	8.21	3.7
Contig39413	1.55	0.87	0.9	0.88	0.96	1.03	1.31	1.5	0.77	1.25	2.56	1.83	2.97	1.36	0.85	1.72	1.67	1.39	2.32	2.71	2.18	1.61	1.32	2.2	0.82	1.36	3.46	2.93	1.66	1.28	1.51	1.86	1.52	0.61	1.42	1.27	1.31	1.04	1.22	1.43	0.42	0.96	1.24	0.68	1.9	1.65	2.04	1.66	2.38
W4a11632|c2_g3_i1	0.14	0.13	0.06	0	0	0.06	0	2.78	0.2	0	0.14	0.59	0	0.12	0	0.19	0.13	4.18	0.16	0.93	0.55	0.3	0	0	4.69	0	0	0	1.86	0	0.07	0.7	0	0.14	0.07	1.97	0	0	0.17	0.05	0.07	0.09	0.19	0.16	0	0.61	1.65	0	0.02
Contig25364	0	2.66	0	0	0	0.53	0	5.13	0.09	1.55	0.48	2.26	20.23	0.82	0	5.19	6.68	0.09	0	0	0.08	0.4	3.05	0.32	0	0.69	2.48	15.39	0.41	13.57	0	3.65	11.83	3.75	0	1.53	0	0	0.45	0	0	0	2.66	0.55	2.67	0.82	0	0.08	5.93
W6b4677|c0_g1_i1	0.99	0.71	0.73	1.62	1.22	1.05	1.25	2.37	3.73	2.47	1.61	2.46	2.79	2.37	4.85	2.8	3.03	0.66	2.45	4.29	2.65	2.05	2.74	1.61	3.4	2.07	2.28	1.53	2.34	2.74	1.7	2.54	2.19	0.84	1.27	1.09	1.71	0.78	3.47	2.99	1.04	1.47	1.45	0.77	3.1	3.19	3.75	1.36	1.21
Contig8989	0.84	1.14	1.33	0.46	0.41	0.84	0.68	4.21	2.61	15.51	1.69	5.35	3.06	5.26	7.3	7.8	8.92	10.25	4.64	5.2	2.59	3.21	2.77	2.33	0.85	4.03	4.47	2.45	1.27	3.14	1.26	4.25	0.83	2.76	2.05	3.54	1.4	1.77	3.77	2.15	0.47	0.91	1.46	0.82	6.18	2.09	2.68	2.84	3.56
W6b14517|c0_g1_i1	0.1	0.4	0	0.36	0.18	0.21	1.76	0.09	0.21	0.74	1.41	0.81	0.16	2.41	0	0.2	0.1	3.1	0	0	2.89	0.68	0	0.12	0.23	0.49	5.91	0.79	0.77	0.21	2.97	1.11	0	0.11	0.4	1.3	0	0.65	0.13	8.03	0	0	0	0	0.65	2.17	4.67	0.44	1.86
Contig13937	4.36	3.28	3.05	3.79	3.07	3.51	9.21	10.97	10.15	9.32	7.47	9.49	8.65	7.12	12.55	11.12	17.92	10.16	7.62	15.11	8.68	6.83	11.9	12.43	6.98	5.16	13.01	9.91	8.04	6.73	6.7	9.82	5.2	7.7	3.88	6.61	3.83	3.84	5.95	10.23	4.89	5.66	4.35	3.46	7.62	9.42	12.64	7.57	13.09
W4a29092|c0_g1_i2	0	0	0	0	0	0	0	0.08	0	0.69	0.2	0.16	0.83	0.86	0	0	0	0	0.47	0	0	0	0	0.23	5.18	0	0	0.25	0	0	0	0.41	1.29	0	0	0	0	0.6	0	0	0	0	0	0	0	0.72	0	0	0.29
W2b7375|c0_g1_i4	0	0	0	0.17	0.09	0.05	0.5	0.41	0	0.36	0.42	0.37	0.16	0	4.59	0.19	0	0.1	0.73	0.12	1.07	0	0.39	3.19	0.58	0.19	0.78	1.11	0.6	0	1.44	0.8	1.73	0.52	0	0.84	0.13	0	0.12	0.15	0	0.85	0.14	0	0	0.15	0.65	0.2	0.7
W0d2295|c0_g1_i1	0	1.95	0.25	10.12	2.27	2.92	69.99	86.75	0.14	4.11	1.21	27.65	74.01	56.76	6.97	86.44	36.14	1.19	0.88	22.22	34.41	38.06	0.42	0.34	33.81	0	1.53	74.99	46.8	53.77	10.81	30.5	19.19	18.91	14.7	6.38	1.92	2.82	1.25	2.45	0.94	0.81	43.03	12.65	0.6	6.05	23.58	34.04	0.1
Contig19207	0.17	0.83	0	0.44	0.45	0.38	1.11	2.75	26.29	3.66	1.43	6.01	0.93	23.52	1.22	45.28	0.94	1.94	1.35	1.18	1.4	2.54	2.43	0.1	181.45	25.31	0.17	491.68	5.35	62.66	2.45	44.84	11.78	3.51	2.16	0.86	12.18	1.37	0.11	5.74	0	0.6	0.47	0.41	0.27	0.9	0.33	1.63	6.62
W3d7793|c0_g1_i1	0.37	0	0	0	0	0.07	0	0.45	1.27	0	0	0.38	1.28	0.81	0	0	0.73	0.38	1.33	0.63	0.75	0.2	16.46	1.92	0.79	0	0	0	0	0	0	1.33	0.43	0	1.59	0.46	0.24	0	0.9	0	0.4	0	0	0	0	0	1.17	1.13	0
W3d28766|c4_g1_i1	0.24	0	0	0	0.35	0.12	0.79	0	0.94	0.71	0.17	0.45	0.98	1.13	0.28	0.76	0	1.06	0.19	1.27	1.56	0.09	12.41	0.09	0.46	1.43	3.36	0.13	0.12	0	0.26	1.35	0	0	0	0.46	0.11	0.28	0	0.35	1.37	0.11	0.76	0	0.08	0	0.1	0.51	0.81
W1a6217|c0_g1_i1	0.48	0.12	0.31	0.31	0	0.24	1.57	0.2	0.95	0.11	8.42	3.53	73.9	34.47	14.53	0.12	0.24	2.98	0	31.81	38.18	0.4	45.06	15.51	12.1	14.03	0.12	19.8	0.27	0	0.4	16	0.09	0.12	5.96	11.24	3.2	3.11	0	3.82	0	0	1.83	0	25.59	0	10.38	16.85	5.03
W2b9220|c0_g1_i5	0.1	0.12	0	0.02	0.06	0.06	0.1	0.1	0.02	0.8	0.03	0.18	0.09	0.13	2.26	0.02	0	0.23	0.74	0.2	0.06	0.13	0	0.03	0.12	0.83	1.1	0.04	0.13	0	0.11	0.33	0	0.12	0.05	0.02	0.06	0.15	0	0.05	0.5	0.24	0.1	0	0.08	0	0.09	0.07	0.03
W5c15571|c0_g1_i2	3.81	1	0.36	1.98	0.48	1.53	4.5	8.14	9.53	5.79	5.86	5.65	8.87	20.49	21.66	20.13	23.82	17	16.49	2.62	14.75	9.28	17.63	23.58	9.61	4.46	30.08	3.93	8.18	0.71	9.3	13.82	13.75	20.61	1.75	7.56	1.47	3.02	5.83	23.37	3.23	0	3.63	2.08	4.54	1.04	26.09	13.3	7.65
W5c26500|c0_g1_i1	0.95	0	0.3	0	0	0.25	0	1.71	0.09	1.16	0.9	0.83	2.02	1.62	0.93	0.67	3.89	0.89	1.16	0	1.14	0.48	0.85	7.81	0.75	1.72	2.01	0.95	0.58	0.09	0	1.45	2.51	2.48	0.5	0.14	0	0.77	0.97	0.06	0.09	0.36	0.6	0	0	0.26	0.56	1.39	4.43
W2b18854|c0_g1_i1	0	0	0.3	0	0	0.06	0	0.29	3.47	0.78	0.37	0.82	0	1.25	2.04	2.52	7.35	0	7.46	0	1.01	3.08	0	0	0.51	0.17	1.52	1.78	0	0.36	0.97	1.58	0	1.08	0	0	1.86	0.16	4.34	0.52	0	0	0	0	0	20.73	0	0.2	1.05
Contig17674	0.6	0	0.03	1.53	0.14	0.46	3.26	3.81	0	1	0.88	1.52	1.88	0.54	0.79	0.08	0.2	0.17	2.54	1.53	2.41	0	2.09	6.08	2.01	4.84	10.57	3.21	3.41	0	2.35	2.35	1.51	0.74	0.55	5	1.87	0.25	1.05	0.42	0.26	0.11	1.5	0.73	1.05	0.72	2.33	1.22	5.32
W5c12587|c0_g1_i3	1.94	1.59	1.92	1.63	4.09	2.23	1.47	2.36	0.41	21	5.57	5.98	14.45	5.86	10.12	8.44	5.68	2.78	2.49	5.79	4.66	3.16	6.61	3.98	4.03	3.39	2.95	6.51	10.9	2.99	4.85	5.77	40.27	3.48	3.02	3.23	0.23	1.88	3.92	2.25	4.96	2.14	0.57	2.11	7.88	3.69	7.47	7.93	3.56
Contig35943	1.2	0	0	0.78	2.15	0.83	2.65	12.31	0.77	3.59	3.02	4.34	5.47	69.67	63.78	6.52	14.58	51.69	1.68	3.52	5.47	5.16	35.71	1.9	0.87	4.16	0.41	1.84	1.79	8.23	38.82	16.91	2.35	0.12	1.58	28.03	1.76	1.66	0	25.85	0.2	0.93	5.81	2.31	0.75	1.98	0	28.14	10.62
Contig12764	0.59	0	0	0	0	0.12	0.29	0	0	0.09	5.82	1.14	0.84	2.01	2.71	1.22	0.59	0.4	0.71	3.15	0.56	0	2.78	0	3.39	0.65	1.42	2.32	0.15	0.4	0.75	1.27	2.6	0.1	0.66	0.57	0.52	0.17	0.85	0.14	0.21	0.96	0.27	0	0.31	1.17	0.75	0.19	1.69
W2b11840|c0_g1_i1	0.4	0.15	0.34	0.55	0.35	0.36	1.19	5.23	2.68	2.34	4.31	2.83	5.74	9.85	12.57	8.39	5.15	2.79	4.25	6.11	6.05	2.62	4.44	8.19	7.47	2.48	4.99	4.38	7.39	3.65	2.19	5.72	4.1	2.2	2.39	2.19	1.16	2.83	4.04	3.28	1.81	3.12	0.66	2.38	1.82	1.78	2.86	1.65	5.25
W4a10492|c1_g2_i7	0.92	1.41	2.48	0.47	0.11	1.08	1.21	3.23	1.32	14.12	1.35	3.62	6.19	1.94	4.66	1.72	9.33	3.62	1.88	2.3	7.21	4.04	2.04	1.12	4.16	1.03	0.52	1.34	1.89	5.45	7.17	3.56	3.82	4.31	0.28	2.4	1.72	1.45	6	0.49	0.59	1.64	0.06	0.2	0.78	1.56	3.87	5.93	7.21
W3d31053|c0_g1_i1	0.35	0	0	0	0	0.07	0.35	13.77	0	3.11	2.19	3.23	5.96	11.98	0	0.5	0.17	12.24	2.12	36.86	0.57	0.19	7.01	0	0.76	9.42	8.76	15.97	1.69	0.53	0.19	6.05	1.91	0	6.94	0	2.32	0.16	0	0.13	0.19	0	0	0	0	0	0.9	0.98	0
W7b21169|c0_g1_i3	1.98	2.91	1.88	2.06	2.44	2.25	3.48	2	3.94	2.65	1.89	2.72	2.6	2.96	3.43	2.28	4.16	5.52	2.85	2.58	2.98	3.22	2.04	3.19	1.9	2.43	2.8	2.35	1.85	2.42	2.68	2.85	1.9	2.89	1.93	2.71	2.4	2.58	2.55	2.85	2.61	2.59	3.15	2.85	4.85	2.34	2.91	2.44	4.09
W5c27270|c0_g1_i1	0	0	0	0	0	0	0.52	0.57	0	0	1.09	0.36	0	0.31	1.86	0	2.42	0.36	0	0	0	0	0.34	0.41	0.13	0.66	2.35	0.44	0.13	0	1.34	0.57	1.49	0	0	0	0	0.31	0	0.13	0.19	0	0	0.42	0.54	0	0.45	0.24	0
Contig36057	5.62	0.68	9.75	19.41	9.32	8.96	17.39	22.25	3.05	115.19	61.93	53.63	78.96	63.81	42.83	69.72	38.25	9.47	43.51	89.76	33.19	56.91	131.06	48.68	14.88	70.82	67.28	96.53	46.87	17.69	93.87	58.64	4.73	13.98	10.63	47.94	6.68	21.85	19.27	17.84	52.71	14.86	13.34	16.92	19.07	11.88	29.74	64.87	11.65
W2b7627|c1_g1_i1	2.42	0.16	0.36	0.07	0	0.6	0.08	0	2.31	1.71	8	2.12	6.08	0.67	10.27	0.24	1.16	0.34	5.87	2.01	3.21	0.82	3.51	0.19	0.9	1.81	0.24	5.86	4.02	0.68	0.83	2.56	3.97	0	1.29	0.76	2.21	1.48	0.93	0.61	1.99	0.35	0.23	0.2	2.25	3.99	0.64	0.19	0.22
W1a11700|c0_g3_i1	6.29	0.81	5.2	0.43	1.16	2.78	9.21	1.41	2.3	10.34	13.08	8.62	67.59	15.61	13.44	2.96	5.09	1.73	35.61	2.49	20.39	13.34	10.85	1.16	11.01	18.21	0.33	20.32	12.45	16.55	23.01	15.38	5.56	4.17	9.93	2.03	5.67	12.72	10	1.99	10.07	3.85	2.36	1.42	7.57	11.56	11.6	12.55	0.28
W5c21573|c0_g1_i1	0.55	0.58	0.43	0.13	1.32	0.6	0.81	0.83	0.55	1.03	0.05	0.73	0.43	0.72	0.81	0.92	0.8	0.78	0.31	0.75	1.49	0.5	0.39	1.06	0.33	0.33	1.9	0.43	1.69	0.57	0.44	0.77	1.26	0.52	0.15	0.63	0.87	0.63	1.06	0.67	0.27	0.57	0.35	0.24	0.42	0.53	0.39	0.98	1.45
W4a23520|c0_g1_i1	0.14	0	0	0.47	0	0.12	0	0.11	0.27	0	2.4	0.46	0.53	0.24	0.48	0.91	1.22	0.42	0.16	0	0.33	0	0	0	2.55	0.13	0.65	0.57	0.1	0	0	0.44	0.53	0	0.26	0.34	0	0	0.67	0.8	0.15	0	0.19	0	1.13	0.41	0	0	0.63
W5c10053|c0_g1_i1	0	0	0	0.18	0.18	0.07	0.62	0.17	0.21	0.56	0.11	0.31	0.73	2.97	0.19	0	2.59	0.21	0.63	0.6	0	0	0.2	0.37	0.3	0	0	0	0.23	0	0.23	0.49	1.3	0.53	0.4	0.17	0.14	0.37	0.13	0	0	0	0	0	0	0.62	0	0	1
W5c26829|c0_g2_i5	3.64	2.27	1.88	0.45	0.7	1.79	0.96	5.45	3.86	14.72	3.29	4.98	4.47	25.9	3.97	11.36	5.36	2.29	2.81	7.91	3.03	1.56	0.85	2.6	1.4	5.12	7.92	7.58	4.43	2.36	5.31	5.59	13.83	0.23	4.27	1.13	1.97	1.77	2.51	7.59	1.92	0.95	1.42	0.58	7	2.07	2.48	2.35	1.9
Contig25652	0	0.52	0.33	1.03	0.83	0.54	9.15	1.82	7.99	4.52	3.75	6.25	50.6	23.97	2.82	23.33	0.53	6.96	2.77	3.18	15.98	31.97	1.88	6.17	23.51	7.23	0.38	25.44	6.79	34.63	5.32	14.39	4.44	0.15	10.79	2.89	1.32	2.98	0.24	28.14	0.18	1.47	0.54	2.39	0.4	0.73	0.12	8.19	1.14
W3d18949|c0_g2_i1	0.06	0.06	0.16	0	0.11	0.08	0.06	0.25	0	0.38	0.13	0.16	0.09	0.38	0.05	0.12	0.06	0.5	0.07	0.07	0.2	0.07	1.48	0	0.09	0.11	0.12	0.2	0.13	0.06	0.07	0.2	0.05	0	0	0.2	0.4	0	0.07	0.22	0	0.17	0	0.14	0	0	0.08	0.46	0.14
W6b11191|c0_g2_i1	1.41	1.71	2.06	0.78	0.26	1.24	7.28	2.32	0.36	6.96	2.69	3.45	2.16	1.87	4.63	5.35	29.58	4.11	1.78	2.61	2.53	1.42	6.28	9.15	1.97	1.19	6.45	2.61	1.96	2.32	1.78	4.72	0.59	9.01	2.73	0.75	0.2	0.88	3.3	10.42	1.3	0.63	1.36	0.07	0.94	1.03	10.48	2.34	5.61
Contig8655	0	0	0	0	0	0	1.24	0.55	0.28	0	0.2	0.45	1.55	0.08	8.18	0.18	0	0.59	0.23	0	0.31	0.42	0	2.45	0.28	0	0.74	0.16	0	1.17	0.84	0.9	0	0	0	0	0	0.34	0.47	0.7	0	1.47	0	0	0	0	0	1.34	0.63
W4a10093|c0_g5_i9	1.56	1.51	0.99	2.75	1.01	1.57	2.14	3.76	2.23	8.91	2.48	3.76	1.98	2.99	2.53	3.55	6.64	36.45	3.44	3.65	4.5	4.26	3.68	3.39	6.4	1.53	6.93	3.97	5.33	2.48	2.23	5.58	2.44	3.67	2.92	1.98	2.38	1.75	4.37	2.9	1.57	0.97	0.56	1.67	1.75	3.98	4.54	3.1	5.6
W4a2607|c0_g1_i1	1.22	2.06	1.05	0.53	0.8	1.13	1.52	2.83	2.41	3.61	6.78	3.04	2.36	4.52	5.62	5.35	29.13	5.44	2.46	2.56	2.24	1.56	7.25	6.53	3.74	1.15	6.95	1.89	3.17	1.14	2.01	5	1.19	3.63	1.08	1.61	1.89	0.81	4.27	7.47	0.88	0.71	0.84	0.12	1.27	0.76	4.83	3.61	7.57
W2b19755|c0_g1_i1	0.11	0	0.1	0.49	0.1	0.16	0.68	0	4.02	0.5	2.24	1.28	8.94	4.93	10.09	2.82	0.45	1.63	0	3.89	2.87	2.85	0.33	0.66	0.16	0.64	0	0.67	0	1.04	0.12	2.21	0.88	0.12	0.55	0.85	0.45	1.1	0.56	0.08	0	0.95	0	0	0.47	0	0.44	0.22	0.56
Contig15585	0.24	0.59	0.78	0.41	0.59	0.52	1.21	0.3	27.35	0.93	0.6	5.33	3.95	3.87	1.14	3.91	0.94	0.83	5.07	5.11	2.1	7.25	4.32	2.21	1.1	0.77	2.15	4.68	3.41	3.16	3.56	3.13	0.66	1	0.78	0.34	1.88	5.57	1.17	0.92	1.57	1.47	0.14	0.4	0.42	1.81	1.26	0.75	0.85
Contig35486	0.17	0	0	0.05	0.4	0.12	0.79	0.93	2.19	1.47	0.95	1.2	0.97	0.61	0.91	0.33	0.85	240.15	1.93	1.57	0.7	0.06	5.23	1	1.07	0.54	0.16	0.05	0.51	0.35	0.63	13.56	0.13	0.58	0.55	0.33	2.49	0.2	0.42	11.34	0.74	0.24	0.16	2.05	1.06	1.78	1.02	0.78	1.45
W4a239|c0_g2_i1	0	0.31	0.18	0.09	0.19	0.15	4.04	11.71	0.63	0	0.33	2.82	0.25	0.47	0.19	0.31	1.48	0.11	1.94	0.24	6.97	7.36	0.83	5.6	20.44	1.11	0.31	0.9	3.71	5.75	0.47	3.08	0.5	0.98	2.16	0.71	0.42	0.85	8.16	0.47	0.92	0.6	0.44	0.77	0.89	0.95	5.33	0.72	0.46
W2b21520|c0_g1_i1	0.6	0.68	0	0.17	0.09	0.31	0.4	2.56	3.58	1.07	4.41	2.08	5.54	9.14	5.03	0.96	2.71	1.24	2.08	1.15	0.16	3.42	5.71	0.24	0.58	0.1	0.49	4.77	4.93	1.03	2.99	2.75	1.73	0.31	0	0.75	0.53	0.36	8.09	21.55	0.22	1.27	0	3.14	0.94	0.3	2.97	2.39	3.57
W7b11564|c2_g1_i8	0.43	2	0.83	1.16	1.47	1.18	2.79	8.33	3.26	4.75	11.33	7.71	59.06	18.8	1.53	8.92	6.04	3.43	13.71	21.7	7.03	4.74	27.3	1.98	6.99	1.47	4.79	12.67	5.3	6.1	6.35	11.47	6.01	1.59	4.78	3.02	4.52	5.46	8.7	0.79	10.34	2.75	3.18	2.22	49.41	1.64	4.27	3.16	10.03
W0d4837|c0_g1_i3	0.13	0.08	0.72	8.01	0	1.79	1.39	0.55	2.25	20.07	198.14	37.11	13.04	4.87	142.26	26.11	13.51	1.08	199.24	0	30.15	0	0.29	35.99	10.37	26.1	0.08	0.04	4.97	44.98	0.65	29.14	2.43	6.46	3.22	3.4	13.14	0.56	30.95	4.56	1.23	0.71	1.28	0.3	0.7	0.13	5.95	1.6	11.75
W5c13311|c0_g1_i2	0.31	0.45	2	0.4	0.88	0.81	1.24	0.89	1.92	1.73	1.87	1.44	2.41	1.18	1.32	2.76	3.64	1.44	1.23	2.77	2.35	1.79	1.29	1.55	0.9	1.4	3.6	0.92	1.68	1.51	0.94	1.83	3.16	0.32	1.51	2.07	0.93	1.73	3.37	0.86	1.26	1.42	0.54	1.31	1.05	1.86	1.6	0.7	1
W5c14411|c1_g1_i13	1.36	6.24	1.95	1.27	2.57	2.68	4.75	22.62	0.11	5.85	11.94	9.92	8	13.93	7.89	17.49	4.29	3.39	4.54	15.34	5.38	8.08	11.75	5.83	7.61	24.67	3.17	9.88	10.35	22.87	3.99	9.92	7.79	6.14	1.32	13.02	4.66	6.84	3.93	6.34	6.63	1.91	1.56	1.22	12.85	12.7	3.93	5.43	4.84
W4a14821|c0_g1_i4	1.8	1.79	1.95	1.38	1.79	1.74	2.98	3.47	4.43	7.28	3.81	4.01	6.71	8.03	4.46	3.16	1.85	0.85	4.75	13.06	5.02	4.3	5.49	2.71	5.88	5.95	3.63	5.76	3.33	8.3	6.8	5.26	2.94	3.42	5.49	4.16	3.9	3.34	4.72	3.15	4.8	1.3	0.5	1.05	5.14	3.31	6.42	7.13	2.97
Contig18098	0.59	1.44	2.17	0.09	0.04	0.87	0.69	2.56	1.27	10.88	1.81	2.87	4.11	0	5.66	3.18	9.28	1.84	0.42	1.14	4.86	3.15	1.07	0.06	2.07	0.56	0	1.13	2.02	4.8	4.25	2.61	3.13	3.7	0.19	1.77	1.32	0.62	3.98	0.91	0.59	1.04	0	0.42	0.1	1.41	3.06	3.87	6.53
W1a30417|c0_g1_i1	3.99	7.39	2.71	1.73	7.97	4.76	20.26	85.76	0.33	219.51	311.7	129.66	285.17	131.97	73.5	88.47	151.12	46.26	89.81	157.2	48.72	40.15	61.18	31.69	26.3	55.71	35.93	2.25	48.91	37.63	133.91	81.36	51.17	4.25	44.3	6.65	23.85	27.03	43.42	21.3	35.66	3.03	8.71	7.38	60.73	59.4	28.42	60.28	15.98
Contig19206	0.05	1.2	0.51	1.25	14.83	3.57	33.26	18.05	19.33	40.69	46.89	31.69	97.83	83.44	36.34	53.45	2.48	59.63	24.05	30.53	36.52	83.1	26.74	26.54	45.67	71.89	2.78	45.45	27.38	115.73	66.32	49.26	16.27	0.36	24.6	19.87	19.43	17.93	1.23	60.22	0.43	4.22	4.08	11.58	4.14	7.48	0.38	35.46	13.79
W4a14811|c2_g5_i1	0	0	0.17	0	12.4	2.51	20.23	10.21	8.53	3.39	24.48	13.05	35.64	26.26	39.76	8.84	5.6	42.98	6.33	2.76	5.91	14.31	23.16	12.9	19.55	43.27	0.19	27.5	15.64	21.06	69.94	22.19	2.04	1.03	10.1	23.38	2.4	0.53	0	33.81	0.43	1.12	3.59	3.61	0	3.6	1.03	28.32	11.63
W0d22155|c0_g2_i2	0	0	0	0.48	4.24	0.94	5.28	5.25	18.29	8.66	5.37	9.93	16.18	15.11	14.4	27.59	1.25	30.37	6.41	8.61	19.23	24.42	8.84	3.41	16.77	9.47	1.34	56.03	3.61	78.95	15.45	18.81	4.56	0	3.91	8.45	4.06	4.57	0.34	12.59	0.3	4.09	1.53	8	1.16	1.87	0	10.67	3.36
W4a28553|c0_g1_i1	0.15	0	0	0.4	0.13	0.14	0.31	0.63	0	0.27	0.32	0.36	0.48	0.55	0.41	0.15	0	0.32	2.05	0.35	0.25	0.68	0	0.18	2.78	0.15	0	0.65	0.23	0	0.34	0.5	0	0.79	0.6	0.51	0	0	0.76	1.02	0	0.43	0.21	0.74	0.48	0	0.79	0.47	0.2
W4a32007|c0_g1_i1	0	0	0	0	0	0	0	2.12	2.55	0	0.67	0.89	2.87	0.57	0.29	0	8.02	0	0	1.48	0	0	0.16	4.33	3.02	0	0	0	3.35	0	3.37	1.45	0	0	1.25	0	2.35	0.57	2.39	0	0.35	0	1.33	0	0	2.41	5.17	0.18	7.58
W6b7671|c0_g1_i2	1.16	1.75	0.71	0.71	0.57	0.98	3.46	1.36	1.63	1.17	2.07	1.91	1.28	1.62	4.42	3.48	1.97	0.51	0.4	4.17	3.65	1.63	1.78	0.58	3.1	0.78	3.34	7.82	3.19	2.69	2	2.55	4.9	0.67	0.96	1.1	2.19	1.17	2.04	1.94	0.72	1.85	1.37	0.79	2.06	1.23	4.03	1.62	2.73
W4a10492|c1_g2_i6	0.16	0.41	1.99	0.45	0	0.6	0.89	3.15	0.42	15.85	1.26	3.61	6.98	0.89	2.02	1.01	9.06	5.63	0.51	4.28	5.94	2.65	2.67	0.61	4.37	0.75	0.15	1.07	1.02	4.39	6.65	3.19	2.13	4.94	1.53	2.32	0.91	1.49	5.53	0.5	0.74	1.18	0	0.38	0.66	1.02	4.05	4.61	6.85
W6b18769|c0_g2_i2	0.32	0.46	0	0	0	0.15	0.87	0.58	0.7	0.35	0.41	0.54	1.1	0.42	1.34	0.45	0.86	0.65	0.57	0.81	0.58	1.04	0.15	0.74	0.23	1.87	1.22	0.2	0.06	1.53	0.09	0.73	0.49	0.48	0.15	0	0	0.56	1.27	2.61	0.26	0	0	0.95	0.16	2.36	0.1	0.04	0.86
Contig20498	1.61	1.27	1.28	0.67	0.16	1	2.02	0.2	3.13	2.49	3.42	2.02	2.22	1.75	3.94	4.29	7.84	0.92	1.66	0.34	2.29	5.69	1.28	1.53	1.38	2.37	1.15	1.11	1.55	2.55	0.39	2.33	1.44	1.34	2.54	1.39	1.82	1.32	1.48	2.19	1.55	1.76	0.33	0.29	1.43	1.51	2.76	2.22	0.61
Contig26512	0.1	0	0.09	0.18	0.22	0.12	0.66	3	0.45	6.09	4.02	3.45	9.29	5.74	1.13	5.69	3.03	5.49	6.71	6.57	4.48	2.95	3.52	3.02	2.12	6.82	4.3	2.7	2.98	3.98	4.24	4.46	2.42	1.97	1.13	0.84	0.2	1.8	6.65	2.24	0.88	0.43	0.56	0.12	3.43	2.05	1.04	7.71	2.03
W3d13133|c0_g1_i1	0.99	0.43	0.28	0.41	0.45	0.51	2.17	1.99	0.36	1.86	1.69	1.41	1.74	2.75	1.02	1.55	0.99	0.61	1.96	1.65	1.87	1.21	5.9	1.25	0.8	0.84	1.88	1.15	1.99	0.56	1.05	1.62	1.01	0.83	0.64	1.16	1.42	0.85	1.23	1.41	0.76	1.03	0.66	1.59	0.88	0.38	0.8	1.95	2.95
W6b186|c0_g1_i1	2.06	0.55	0	0.4	0.4	0.68	0.46	1.6	0	2.55	3.35	1.57	1.25	3.06	1.13	0.88	1.83	2.25	0	2.9	1.88	1.26	1.46	2.41	0.58	1.09	0.89	1.07	2.47	0.94	2.02	1.54	0.63	1.76	0.67	1.34	1.22	2.04	0.43	2.11	0.5	0.64	1.9	1.38	2.27	0	1.33	1.86	1.1
W4a31770|c0_g1_i4	1.03	0.5	1.26	0.95	0.63	0.87	2.29	1.8	1.12	2.62	2.29	2.05	2.98	2.07	2.54	1.28	2.35	2.54	2.66	2.67	1.93	1.84	1.54	2.92	2.92	2.07	2.64	2.55	2.19	1.54	2.11	2.28	2.27	1.36	1.43	1.82	1.59	1	1.65	2.22	1.56	1.82	1.46	1.11	1.6	2.61	3.34	1.82	2.94
W3d16673|c0_g2_i1	0.09	0.18	0	0.12	0.08	0.1	1.41	1.74	0.42	0.55	0.79	0.9	0.44	0.88	1.1	0.59	1.18	5.64	0.46	0.49	0.81	0.98	2.82	0.88	0.17	0.18	1.68	0.96	0.32	1.68	1.14	1.18	0.26	0.1	0.09	1.06	1.07	0.67	0.47	0.9	0.31	0.79	0.33	0.23	0.05	2.54	0.36	1.15	2.41
W4a21202|c0_g1_i2	0.24	0.12	0	0.21	0.14	0.14	0.65	0.53	0.32	0.65	0.55	0.69	1.85	0.83	0.51	0.43	0.77	0.33	1.47	1.02	0.53	0.44	0.67	0.61	2.16	0.92	0.7	0.86	0.36	0.66	0.27	0.81	0.47	0.04	0.82	0.4	0.16	0.79	0.65	0.98	1.23	0.34	0.28	0.53	0.46	0.91	0.83	1.01	0.88
W5c597|c0_g1_i1	0	0.78	0	0	0	0.16	0	0	37.02	0	0	6.17	0	0	1.62	1.93	0.4	0	4.64	0	1.32	17.44	2.36	0.24	1.74	0.76	0.19	9.54	1.05	0	0	2.27	1.26	0	0.39	0.84	0.27	3.57	0	0.3	0	0.56	1.66	0.96	0.42	1.2	2.07	6.93	0.73
W6b15618|c0_g1_i1	0	0.49	0	0.07	0	0.11	4	1.12	0.25	1.82	0.36	1.27	1.85	3.42	0.53	0.49	41.9	0.53	1.55	0.39	0.63	0	8.43	2.59	0.55	0	3.29	0.14	2.34	0	1.22	3.68	0.6	1.39	0.41	0.21	0.57	0.38	0.42	9.42	0.18	0	1.06	0.1	0.27	1.27	4.82	1.84	0.93
W2b13476|c0_g1_i4	0.21	0.13	0.24	0.12	0.12	0.16	0.35	1.25	0.27	3.88	0.58	1.25	3.07	0.68	4.89	1	4.35	9.21	1.18	0.08	0.57	0.99	0.41	0.49	0.95	0.39	5.61	1.41	0.15	0.28	0.15	1.89	1.35	0.64	0.6	0.63	0.55	0.68	0.6	0.92	2.78	0.19	0.29	0.42	0.5	0.41	1.51	0.62	2.02
Contig33067	0.19	0.56	0.42	0.59	0.34	0.42	3.1	0.32	0.38	1.64	1.62	1.33	1.5	1.9	2.16	1.21	2.03	5.49	2.12	2.22	1.27	0.96	1.33	0.68	0.56	0.92	1.31	0.98	0.86	1.78	0.85	1.59	0.76	0.99	1.31	0.81	1.03	0.52	0.48	5.42	0.31	1.09	0.53	1.05	0.6	1.16	1	1.87	1.93
W1a1017|c0_g1_i2	0	0	0	0	0	0	0	0.27	0	2.95	0.17	3.78	11.2	0.15	0.89	2.7	1.32	0	0	10.66	0	0.36	0	4.85	0	14.44	0	1.68	0	3.21	0	2.71	1.04	0.17	0	3.73	0	0	4.31	0.61	10.96	0	0	0	0	31.24	0	0.37	0.11
W5c28052|c1_g1_i1	3.68	2.88	6.04	5.73	5.12	4.69	8.23	6.12	13.02	8.87	9.58	10.17	15.64	7.48	5.06	13.85	20.95	3.84	9.7	19.56	10.43	12.49	6.97	8.95	6.99	12.18	13.97	9.64	10.79	13.5	5.6	10.93	15.03	3.85	7.06	6.96	10.11	10	15.98	12.52	10.45	3.13	3.54	6.75	4.82	8.04	12.29	8.08	14.13
W3d11496|c2_g1_i1	2.32	3.36	3.26	2.78	4.82	3.31	12.31	6.06	28.52	21.28	15.83	14.4	14.07	8.21	6.35	15.26	13.13	10.86	10.23	14.45	6.21	10.01	53.47	10.54	10.05	20.74	20.99	11.78	9.71	4.3	9.91	13.7	9.84	2.1	19.65	5.75	5.74	6.74	11.93	21.73	7.08	16.84	14.09	15.48	14.42	13.55	15.3	13.33	17.11
Contig11394	0.44	0	0.09	1.05	0.48	0.41	0.99	1.63	10.38	2.46	19.02	5.96	10.89	2.46	5.92	0.74	3.41	4.1	15.15	9.51	5.61	1.82	5.51	1.42	4.07	11.29	7.67	10.76	1.89	0.9	5.83	5.73	2.68	2.37	3.96	4.42	2.49	3.24	1.91	10.01	0.6	2.17	0.91	0.4	11.15	7.43	3.12	2.63	8.24
Contig29271	1.39	5.07	1.38	0.93	0.99	1.95	12.04	0.94	8.37	17.97	15.77	13.13	5.21	19.85	9.44	34.79	1.09	157.1	9.62	10.01	8.31	9.55	13.01	114.34	5.88	4.28	11.65	5.43	11.73	13.31	29.23	24.94	5.6	31.6	6.69	2.59	3.03	12.37	8.27	192.46	1.26	3.13	0.1	2.97	0.89	7.52	7.18	14.61	84.84
Contig5543	7.3	1.78	2.06	3.22	3.27	3.53	15.8	10.54	6.57	10.77	10.09	15.76	13.22	36.18	13.78	26.2	4.75	18.71	37.17	38.95	22.45	20.11	13.81	4.12	20.97	22.72	32.05	23.25	6.35	7.61	16.76	19.96	10.17	2.86	6.28	6.22	15.68	23.64	6.8	22.6	10.55	6.04	4.76	9.9	25.33	14.31	42.48	25.38	25.02
W5c17849|c0_g1_i3	3.17	2.43	1.63	1.26	0.73	1.84	5.85	4.95	4.36	4.78	2.25	4.7	4.31	4.04	8.3	6.67	14.26	3.45	3.9	7.02	4.04	5.17	4.18	6.18	3.75	1.79	6.2	2.57	3.5	4.76	3.88	5.16	7.74	4.59	1.71	3.45	1.4	3.64	4.8	2.79	2.29	2.53	3.28	1.27	5.64	5.86	5.21	3.23	7.12
Contig22408	0	0	0	0.38	0.51	0.18	0.15	1.6	1.83	194.15	0	37.09	13.48	77.29	114.06	0	46.79	0	27.61	1.57	0	0	5.4	13.07	12.41	19.21	15.02	0	0	0	2.15	18.32	0	0	39.58	1.22	3.43	7.63	0.12	0.4	0	0	3.3	2.17	13.31	5.84	47.42	0	48.13
W3d4597|c0_g3_i1	0	0	0.08	0	0.32	0.08	1.56	1.74	2.36	0.65	5.75	2.17	0.57	5.16	0.74	4.49	1.56	4.36	1.12	1.37	3.08	10.19	3.15	0.11	0.46	0.35	2.31	1.56	1.43	0.66	0.61	2.28	0.29	0.28	1.25	0.69	0.98	0.24	1.71	0.88	0.8	1.29	1.01	2.31	0.77	0.41	1.54	0.77	1.89
Contig6441	0.5	0.08	1.25	0.65	0.36	0.57	1.12	7.04	0.86	2.3	3.26	4.1	4.94	4.97	8.77	9.66	5.68	6.39	0.91	0.91	2.73	4.43	1.06	0.78	4.09	3.07	2.17	2.47	1.79	1.99	1.74	3.61	1.4	2.77	0.81	2.25	0.88	0.15	3.3	7.63	0.36	3.27	1.15	1.05	6.24	1.62	2.46	5.41	2.19
Contig34827	2.63	1.75	1.33	1.39	1.35	1.69	12.57	6.5	3.67	10.57	11.03	8.62	8.59	8.01	8.92	8.65	17.78	21.37	5.18	8.21	4.28	3.91	8.52	8.44	2.38	4.78	9.86	7.15	5.14	5.21	4.63	7.95	4.95	7.37	3.82	4.23	2.4	3.61	5.67	12.47	3.29	2.91	1.81	2.84	3.49	5.06	9.83	5.55	11.82
W3d31849|c0_g1_i7	0	0	0.09	0	0	0.02	0.29	0.15	0	0.36	0.15	0.16	0.06	0.1	0.42	0	0.22	0	0	0.25	0.09	0.04	1.99	0	0.03	0.03	0.04	0.03	0.03	0.41	0.08	0.2	0.11	0.11	0.49	0.03	0.1	0	0.09	0.05	0.08	0.1	0	0.13	0	0.11	0.37	0.05	0.16
W4a17493|c0_g1_i1	1.87	0.45	0.8	0.4	0.61	0.83	1.93	0.91	4.63	1.2	1.95	1.85	1.09	1.25	0.68	2.69	3.97	2.47	1.21	2.89	0.48	1.67	1.09	0.82	6.17	0.22	2.82	0.5	1.43	1.43	1.42	1.8	1.74	0.78	1.47	0.78	0.16	2.08	1.74	0.99	1.96	0.57	0.89	4.42	0.67	0.35	0.9	2.16	1.14
W4a10641|c0_g1_i1	0	0	0.26	0.04	0.13	0.09	1.06	0.04	0.3	0.85	2	1.06	2.58	0.09	0.09	3.82	1.51	0.57	0.49	0.23	0.37	0.28	0.25	0.18	4.44	0.05	14	3.71	0	0.51	0.22	1.76	0.43	0.15	0.2	0.25	0	1.48	0.37	0.37	1.64	0.07	0.14	0	0.89	0.3	0.71	1.04	4.66
W4a29424|c1_g1_i1	0.3	0.26	0.42	0.63	0.56	0.44	1.61	6.55	3.31	2.06	3.56	3.02	5.96	0.08	0.22	4.93	0.12	6.56	2.99	0.91	0.1	0.1	2.03	1.6	18.54	1.07	10.49	1.78	8.57	13.16	11.09	4.75	0	1.62	2.07	0	2.51	0.87	8.56	0	0	0	5.5	0	0.29	3.05	4.27	1.34	3.42
W1a9010|c0_g1_i1	1.95	2.74	6.62	3.1	2.79	3.44	9.75	8.4	16.64	6.9	5.53	10.37	14.21	7.41	10.42	11.54	17.41	5.51	5.58	11.73	7.91	14.64	7.41	3.15	5.3	5.28	10.27	9.25	5.56	11.84	4.04	8.87	5.99	4.8	6.12	7.66	7.28	5.7	8.51	5.48	4.48	5.6	2.37	1.9	6.82	7.09	6.69	7.66	9.61
Contig15448	0.6	0.46	0.92	1.34	1.04	0.87	3.99	1.37	3.83	7.05	8.02	6.93	1.66	8.65	7.23	8.17	13.06	7.12	7.52	6.22	5.12	5.49	1.92	1.18	1.55	1.58	5.69	3.23	2.35	11.42	3.87	5.42	1.91	0.79	2.48	3.82	3.88	3.49	3.54	1.32	2.84	0.92	0.41	1.57	2.36	4.01	5.51	2.07	4.86
W1a15897|c0_g1_i3	4.63	4.07	2.62	4	3.39	3.74	7.15	20.05	1.25	6.65	5.38	14.88	6.78	12.84	7.89	6.76	7.34	16.81	4.85	8.93	9.73	3	3.6	9.1	8.66	3.58	8.93	9.89	7.66	11.26	8.8	8.23	2.05	6.88	2.96	5.78	5.31	8.79	6.64	4.73	4.56	12.09	6.09	12.37	6.9	2.83	2.7	5.19	4.74
W3d16743|c0_g1_i5	13.49	13.89	11.44	13.3	15.18	13.46	27.95	31.14	28.62	38.92	28.96	29.72	19.56	24.28	28.91	30.18	39.39	31.81	19.27	25.35	21.17	20.84	42.49	21.62	24.5	25.43	31.33	21.86	21.32	21.17	29.56	26.32	17.35	15.1	19.31	26.44	12.31	28.21	20.41	18.68	15.1	20.62	18.75	17.38	24.26	15.68	27.61	28.12	36.78
Contig18461	0.49	0.61	2.35	0.36	0.49	0.86	0.7	1.84	2.63	1.12	2.56	2.03	1.14	2.99	0.25	5.77	3.63	1.37	1.79	1.61	1.26	1.69	0.48	0.41	34.74	1.92	4.05	2.91	0.99	0.86	0.62	3.6	1.09	0.57	0.81	0.87	2.98	0.62	0.95	1.8	3.79	1.28	1.83	5.04	1.89	1.47	0.99	1.49	1.69
Contig17592	0.52	0.28	0.6	0.48	0.26	0.43	0.99	1.66	1.35	1.41	1.34	1.15	1.23	1.7	0.79	1.38	1.36	1.37	1.56	0.59	1.08	1.17	1.12	2.45	3.48	0.17	2.31	0.31	0.49	0.64	0.49	1.25	0.8	1.09	1.03	0.46	0.64	1.21	0.46	0.84	0.76	1.5	1.37	0.57	0.73	1.1	1.51	1.04	1.49
Contig5903	0.28	0.16	0.6	0.17	0.19	0.28	1.62	1.88	1.22	1.17	1.26	1.64	3.95	1.65	2.7	0.97	1.34	1.53	1.97	2.34	1.6	0.92	1.81	1.34	1.98	0.66	3.08	1.52	1.91	1.88	0.28	1.76	1.18	0.37	1.22	1.98	1.49	1.81	1.35	1.81	0.27	0.86	0.39	1.11	0.79	1.46	2.23	1.19	2.5
Contig9019	0.29	1.58	0.24	1.11	0	0.65	21.01	10.48	12.28	13.13	6.32	10.66	6.2	14.1	7.77	14.08	204.6	3.6	4.59	9.82	7.47	0.63	36.43	76.47	2.73	0.54	77.73	1.15	17.16	0.29	4.86	25.8	3.01	26.32	3.39	1.48	2.37	2.85	9.62	1.21	2.01	1.4	3.54	1.8	2.45	1.49	18.97	21.62	25.43
W4a11448|c0_g1_i1	0.88	0.54	1.08	0.61	0.75	0.77	1.79	3.23	2.77	2.81	2.61	2.84	1.76	1.6	3.61	2.2	5.48	2.5	2.69	8.02	2.46	3.43	2.37	2.6	4.66	1.12	2.26	2.84	2.04	2.68	1.83	2.96	1.34	1.19	1.91	2.18	1.14	1.26	3.12	5.37	1.64	0.6	1.46	0.91	2.07	2.79	6.26	3.59	3.08
Contig13787	0.85	1.03	0.63	1.14	0.93	0.92	2.84	2.62	4.93	3.43	2.05	3.43	3.18	4.3	5.33	4.57	4.26	2.59	3.33	4.5	2.62	3.11	7.26	2.55	2.15	2.34	2.2	4.81	2.29	2.99	1.69	3.48	2.11	2.77	2.55	2.78	1.13	0.98	3.18	10.48	1.26	1.63	1.71	1.72	1.98	3.87	9.02	2.66	3.66
Contig14928	2.27	1.4	2.11	1.2	1.92	1.78	14.16	5.75	3.43	11.33	14.2	11.43	11.05	13.31	10.98	10.76	7.54	21.63	6.2	14.82	8.2	8.79	8.88	7.44	4.32	5.37	18.54	2.99	4.92	21.85	8.74	10.33	6.1	4.77	6.29	6.35	4.02	3.97	7.25	4.08	6.83	3.98	2.95	9.75	3.61	6.12	16.69	13.9	17.65
W6b20095|c0_g1_i2	0	0.22	0.1	0.49	0.2	0.2	0.9	0.83	0.44	0.6	2.58	0.93	0.44	1.9	0.9	0.86	0.9	3.59	0.14	1.93	0.55	0.25	0.22	0.13	0	0.85	2.06	0.19	0.83	1.26	0.74	0.93	0.79	0.8	0	0.19	0.15	0.8	0.28	3.81	0.24	1.73	0	0.94	0.23	0.67	1.01	0.57	1.45
Contig10351	0.52	0.41	0.15	0.15	0	0.25	7.72	2.26	0.42	0.53	1.25	2.24	2.2	2.37	0.77	2.3	1.28	2.21	0.63	0.2	1.48	0.66	0.84	1.41	4.28	1.22	0.99	6.47	0.96	0.79	1.61	1.72	0.54	0.88	0.25	2.07	0.34	3.05	2.23	4.8	0.09	0.24	0	1.13	1.07	0.38	0.55	0.96	0.91
Contig24232	0	0	0	0	0.55	0.11	0	9.58	8.11	32.94	4.11	16.89	36.81	11.37	27.16	6.65	1.41	3.9	27.92	58.03	0.26	3.8	1.54	0	1.71	3.88	50.16	42.29	43.07	7.07	6.76	17.57	17.35	1.29	2.14	0.13	3.98	7.98	1.75	49.77	1.71	1.1	5.21	0	28.69	1.41	19.44	18.94	0.78
Contig605	6.66	5.01	6.73	2.03	5.63	5.21	20.34	71	76.9	41.71	78.74	62.86	60.17	47.96	51.32	163.97	76.68	6.76	134.63	64.14	23.88	52.65	35.06	124.78	35.21	72.82	48.54	64.98	41.96	66.37	52.78	64.46	32.57	33.13	24	25.59	66.17	9.22	334.5	60.33	32.77	21	9.18	13.03	36.06	58.24	268.37	77.64	52.42
Contig15020	1.34	0.19	0.52	0.17	0.53	0.55	6.3	6.95	13.35	7.7	3.57	6.99	8.28	6.22	11.03	8.75	1.27	6.16	4.73	3.31	7.36	14.59	3.28	9.58	3.01	6.1	3.24	17.1	4.74	7.25	2.66	6.77	2.31	0.89	2.73	4.36	2.32	6.44	9.14	7.66	2.18	3.1	1.2	0.56	3.7	4.51	5.09	11.81	4.14
W3d16205|c0_g1_i5	0.39	0.16	0.63	0.1	0.24	0.31	1.01	1.2	2.56	1.15	1.41	1.37	1.18	0.55	2.86	0.92	1.4	2.43	1.43	2.19	0.78	1.11	1.65	0.39	1.62	0.64	0.92	1.52	0.54	0.74	0.25	1.22	0.44	1.21	2.23	0.98	0.45	1.45	0.42	0.83	0.3	0.32	1.94	0.4	0.53	1.09	1.37	1.1	0.67
W4a7178|c0_g1_i1	1.77	0.8	2.41	5.31	1.99	2.46	9.98	13.33	5.87	34.25	18.02	15.57	16.72	12.23	21.74	8.78	13.79	27.24	12.13	22.44	5.88	10.28	14.87	6.57	14.58	6.11	14.55	7.84	13.53	14.32	7.44	13.21	6.42	3.08	6.86	5.02	5.25	10.81	28.59	10.34	11.61	6.56	2.87	11.36	3.9	16.33	14.04	13.12	8.55
Contig35196	0	0	0	1.18	0.46	0.33	1.26	5.17	7.57	9.33	8.64	5.59	2.85	10.74	7.31	2.71	0.73	0.65	3.44	1.32	2.49	6.1	9.96	4.42	1.44	3.47	3.04	5.33	2.1	4.6	6.35	4.16	0.49	7.4	1.12	4.19	2.51	1.68	1.3	4.02	2.95	3.53	1.74	0.88	9.49	3.45	5.26	5.44	0.8
Contig10286	0.34	0.11	0.25	0.4	0.05	0.23	5.83	5.21	1.47	4.33	6.74	4.59	12.12	11.72	5.67	3.4	3.02	0.83	3.4	6.76	2.81	1.57	5.71	3.75	2.81	2.17	1.21	4.07	4.63	2.04	1.32	4.16	1.83	2.81	4.49	2.05	2.96	2.13	1.7	1.73	1.73	3.21	0.87	2.13	2.92	3.08	3.68	7.05	2.05
Contig15236	0.38	0.37	0.54	0	0.33	0.32	4.03	14.08	47.27	63.13	35.9	27.8	55.46	12.58	22.18	4.59	6.41	7.79	10.71	25.6	20.43	21.03	37.99	9.73	4.73	13.48	0.36	26.57	9.55	20.18	22.74	17.48	1.18	25.13	8.43	14.06	13.22	17.58	4.06	1.39	16.11	1.94	5.74	6.35	9.58	13.57	5.99	9.29	13.7
W4a26211|c2_g2_i2	0.93	0.81	0.64	0.32	1.05	0.75	13.44	136.3	42.98	272.15	73.1	104.65	240.36	50.35	88.61	41.91	42.92	152.56	8.45	123.32	15.04	11.72	71.94	38.42	42.1	56.92	23.99	103.72	180.29	15.42	26.14	70.22	4.64	29.51	5.85	5.18	37.84	47.82	36.07	88.5	5.53	16.26	23.03	11.69	32.64	6.8	55.59	7.96	37.86
Contig39095	2.28	0.57	0.68	0.43	0.26	0.84	1.39	5.37	0.78	0	0.41	2.01	3.46	7.94	1.59	3.99	1.78	4.08	1.32	2.61	1.54	0.22	1.26	1.62	0.43	1.59	0.57	2.6	2.58	0.81	0.54	2.13	0.46	0.41	1.92	1.81	0.66	1.14	0.37	4.96	0.43	0.28	0.68	0.24	15.57	3.41	0.25	0.42	7.55
Contig32362	0.7	0.34	0.08	2.28	3.22	1.32	6.5	16.7	0	0.63	195.35	36.53	32.92	2.19	1.02	0	16.14	26.48	247.4	4.44	8.35	98.24	3.01	1.75	1.21	0.33	7.39	29.5	29.81	0.81	5.52	27.18	1.31	0	0.26	0.59	0	0.16	4.03	148.58	1.33	0.12	0.12	0.21	61.26	4.6	0.68	7.32	1.52
W4a11576|c0_g1_i5	0.59	0.31	0.86	0.24	0.24	0.45	0.87	0.64	0.72	1.1	0.76	0.74	0.64	1.02	0.33	1.01	2.19	0.42	1.33	1.47	0.6	0.6	0.67	0.86	3.27	0.61	0.26	0.77	0.44	1.21	0.5	0.96	0.21	0.28	0.4	0.95	0.79	0.61	0.74	0.34	0.35	0.19	0.44	0.38	0.67	0.55	0.41	0.47	0.5
Contig39454	0.83	0.4	0	0.63	0.72	0.52	0.41	1.02	6.15	13.17	0.32	3.53	4.34	4.7	1.11	11.82	4.23	2.56	0.88	3.56	6.53	5.46	1.32	0.12	1.5	2.55	0.8	2.45	0.92	1.27	1.37	3.03	1.46	1.48	0.1	2.93	0.55	2.85	1.54	0.15	1.01	0.15	0	1.74	4.1	0.31	0.8	2.44	5.49
W6b2468|c0_g1_i1	0	0.19	0	0.34	0.34	0.17	0.59	0.32	0.19	0.35	0.82	0.38	0.15	0	0	0	2.34	1.01	0	0	0.96	0.64	1.15	1.37	0	0.19	1.51	0.33	0.87	0	0.22	0.57	0	0.6	0	0	0	0	0.73	1.44	0	0	0.54	0	0	0.88	0.25	0.05	1.17
W1a11847|c0_g1_i1	0.4	0	0.15	0.34	0.34	0.25	1.05	0.14	0	0.35	1.24	0.63	0.99	0.27	0.71	0.46	0.48	0.68	0.75	0.71	1.37	0	1.63	2.77	0.79	0.21	0.93	1.08	0.72	0	0.63	0.8	0.34	0.22	1.06	0.7	0.18	0	0.76	0.55	0	0.31	0.12	0.05	0.32	0.33	2.71	0.28	1.34
W3d30813|c0_g1_i1	0	0.2	0	0	0	0.04	0	0.67	0	0.55	0	0.2	0	0	0.36	0.2	0.2	0.42	0	0.23	0.17	0.22	1.8	0	0	0	3.74	0	0	0	0	0.39	0.96	0	0	0	0	0	0	0	0.44	0	0	0	0	0	0.26	1.55	0.07
W4a5877|c0_g1_i1	0	0	0	0.14	0	0.03	0.16	0.64	0.15	0.69	0	0.3	0.97	1.11	0.56	1.2	0	0	0.38	1.25	1.79	0	0	0.37	0.68	0	0	0.53	0.23	0	0	0.48	0.73	0	0	0	0.21	0.55	0.19	0	0	0.22	0	0	0	0	0	0.13	1.09
W1a7141|c0_g1_i3	2.27	0.47	0.24	1.19	0.18	0.87	1.03	0.96	0.14	1.1	2.51	1.95	1.17	0.74	1.35	2.37	12.82	1.7	0.42	0.63	1.91	0.76	10.43	22.52	0.35	0.91	0.53	0.06	3.01	0.56	1.82	3.37	0.7	3.02	0.47	0.46	0.18	1.47	2.81	6.18	0.52	0.39	0.66	0.08	0.43	0.72	11.05	3.6	0.96
Contig15549	0	0.86	0.07	0	1.33	0.45	0.47	5.41	0.38	5.6	2.22	2.77	13.9	1.52	2.66	2.08	3.14	14.33	5.37	4.39	7.14	0.37	4.16	2.14	1.08	2.21	3.45	5.22	1.64	0	3.42	4.12	1.66	0.7	0.82	1.63	0.45	0.68	1.89	4.89	0.18	0.12	0.18	0.82	7.04	0	0.49	1.33	1.52
W4a27450|c0_g1_i1	0	0	0	0	0	0	0	0.21	0.26	0.81	0.55	0.31	1.01	0.23	0.47	0.25	0.13	0	0.48	0.6	0.21	0.72	0.26	0.31	1.61	0.37	0	0.11	0.1	0	0.29	0.38	0.31	0	0.25	0.22	0	0	0.32	0	0.14	0.37	0	0	0.27	0	0	0.22	0.48
W4a10484|c0_g1_i1	0.23	0.23	0.1	0.2	0	0.15	0.59	0.19	0.12	0.31	0.37	0.32	0.18	0.52	0.63	0.11	0.35	0.12	0.14	0.94	0.29	0.26	0.34	0.41	0.76	0.56	0.34	0.4	0.26	0	0.77	0.39	0.18	0.12	0.23	0.2	0.78	0.31	0.44	0.35	0	0.16	0	0.42	0.49	0	0.15	0.62	0.23
Contig11277	0.6	0.89	1.76	0.52	1.09	0.97	1.49	5.42	3.86	5.34	7.47	4.7	18.77	2.65	7.77	4.44	7.62	11.95	10.07	7.85	11.6	5.17	6.03	1.46	3.4	2.74	7.38	9.27	5.65	3.78	7.31	7.1	3.74	1.89	3.86	3.89	1.5	0.68	1	3.29	1.74	0.51	0.67	3.91	7.33	5.6	6.62	5.83	1.99
W4a25393|c0_g2_i1	0.31	0.3	0.13	0.13	0.27	0.23	0.47	0.13	0.62	0.14	1.62	0.5	0.73	0	0	0	0.47	3.37	0.19	1.43	0.13	0	0.15	0.18	2.25	1.03	0.3	0.26	0.23	0.32	0	0.58	0.49	0.16	0	0.39	0	0.14	0	0	0.34	1.96	0.86	0.56	0	0	0	0.48	0.67
W7b14972|c0_g1_i1	0.63	0.95	1.27	1.34	0.31	0.9	2.6	1.67	1.32	1.56	2.64	1.89	1.91	2.25	2.51	2.96	5.74	4.34	2.39	3.06	0.92	1.62	5.29	2.05	1.32	1.8	0.81	1.01	0.99	1.15	0.7	2.25	0.88	1.65	0.75	1.46	0.84	0.69	1.39	1.4	0.61	0.59	1.94	0	2.27	1.26	4.51	0.93	1.26
W2b19942|c0_g1_i1	0	0	0	0	0	0	0	6.15	0.11	21.03	0	5.64	16.64	13.38	27.04	0	0	16.7	4.1	4.07	1.7	0	1.87	0.99	4.35	3.99	1.9	6.53	0	0	0	5.43	0.53	0.69	2.73	1.31	0.15	0	0.63	1.57	0	0.08	0	0	1.52	5.8	2.1	2.38	0.9
W4a10008|c0_g1_i1	0	0	0	0	0	0	0	0	0	0	90.99	15.17	0	0	0	0	0	0	69.94	121.98	0	0	0	45.06	1.67	0	0	1.36	0	0	0	12.63	0	0	0	0	4.26	0.48	0	0	0	0	0	0	0.37	0	0	17.89	0
Contig26432	1.5	0	1.42	0.34	0.13	0.68	2.33	1.08	1.06	0.35	2.28	1.62	0.79	0.04	0.95	6.05	6.91	1.7	0.06	3.56	0.24	8.04	0.62	0.17	0.49	1.06	3.09	0.9	0.68	6.03	0.8	2.22	2.01	1.29	0.05	1.54	3.74	0.6	0.12	0.39	0.37	0.07	1.94	0.29	0.15	2.25	3.68	0.31	11.37
W3d14726|c1_g3_i3	0.64	0.12	0	0.5	0.61	0.38	1.6	1.11	1.46	2	3.75	1.73	1.34	1.6	0.8	1.11	2.3	1.26	1.17	6.85	0.58	2.89	5.09	1.88	0	0.61	2.41	1.03	1.24	0.98	3.88	1.95	0.6	1.05	0.37	0.69	1.45	1.6	0.56	0	0.14	0	0.8	0.31	0.67	0.67	2.31	1.44	2.72
W1a5317|c0_g1_i1	4.2	0.97	3.09	2.77	3.48	2.9	2.4	1.97	4.75	2.49	3.13	3.12	3.57	5.34	3.21	3.07	3.59	1.44	2.67	3.44	3.11	3.07	2.35	3.04	2.31	3.03	2.12	2.88	3.56	3.67	4.4	3.15	1.72	3.27	3.29	3.83	1.33	4.08	3.22	3.83	2.6	2.52	2.76	2.64	3.12	2.39	3.6	2.46	2.72
Contig6442	0.65	1.35	0.8	0.16	0.33	0.66	1.96	0.54	0.92	1.58	1.27	1.39	0.44	0.17	2.5	2.33	9.31	2.89	1.36	0	0.76	1.44	0.73	1.31	4.19	1.24	0.81	1.82	2.85	0.95	0.62	1.88	1.02	1.72	0.82	1.01	1.12	0.5	2.31	2.2	0.41	0	0	0.22	0.39	0.42	2.16	0.63	2.73
W2b20332|c0_g1_i1	0.1	0.18	0	0.08	0	0.07	0.28	0.62	2.82	0.59	0.69	0.9	1.25	0.17	3.31	2.19	0.85	0.39	0	1.75	0.78	0	0.19	5.67	0	0.36	0.18	2.33	0.85	0	0.31	1.08	0.15	0.19	0.09	0	0.25	0.34	0.59	0.14	0.1	0.27	0.26	0.46	0	0.28	0.37	0.69	0.44
W2b12939|c0_g1_i3	0.33	0.53	0.62	0.19	0.19	0.37	1.53	0.3	1.4	1.65	0.57	0.95	0.88	0.71	3.57	2.76	1.41	0.19	0.26	0.96	0.63	1.56	0.36	0.68	0.5	0.72	1.61	0.25	0.24	0.89	0.92	1.01	0.14	0.45	0.39	0.73	0.48	0.45	0.36	1.23	0.39	0.51	0.3	0.26	0.38	0.82	0.51	1.39	0.52
W4a26307|c0_g2_i1	0.69	0.3	0.26	0.33	0.13	0.35	0.85	0.76	1.53	1.24	0.64	0.89	0.3	0.21	0.07	0.37	1.31	4.61	0.19	1.59	0.57	1.44	1.36	0.27	1.84	0.95	0.82	1.24	0.57	1.1	0.59	1.02	0.06	0.63	0.52	0.06	0.72	0.14	0.48	0.45	0.17	0.87	0.21	0.09	0.32	0.46	0.59	0.37	1.58
Contig7815	0.28	0.2	0.77	0.12	1.45	0.56	2.97	1.08	1.51	1.35	4.04	2.03	5.15	5.3	3.4	5.04	1.45	2.35	1.09	3.49	2.94	3.04	2.37	0.81	1.7	0.79	0.73	1.52	0.87	0.99	0.84	2.31	0.22	0.21	1.01	1.04	2.02	0.55	1.63	0.31	0.52	0.58	0.19	0.08	1.73	1.03	1.42	1.61	1.49
W4a12828|c0_g1_i1	0	0	1.34	0	0	0.27	1.01	1.13	7.63	3.59	0	2.23	0.43	1.23	0.25	0	0	0	4.68	0.53	0.38	1.11	0.27	7.3	56.68	8.69	0.71	33.03	0	2.53	0	6.2	0	2.06	0.09	0.69	0.49	0.41	1.48	0	0	0	0	1.43	0.1	0.55	0	0	0.18
W4a25244|c0_g1_i2	3.91	2.27	0.75	2.11	2.73	2.35	4.32	5.67	2.96	6.19	6.49	4.72	3.36	1.97	4.81	5.21	20.33	10.96	1.17	3.65	4.07	1.87	3.92	9.69	7.25	4.31	13.46	3.94	3.32	2.49	3.8	5.77	3.56	3.53	1.34	1.04	2.39	0.7	6.44	8.61	2.1	1.23	1.08	0.28	0.62	2.89	5.68	6.73	20.66
W3d12433|c0_g1_i1	0	0	0	0	0	0	0	0.04	0	257.25	262.3	86.6	0.03	35.69	0	109.6	0.04	623.13	57.4	0.05	33.44	0.05	94.06	99.08	0	0	0	54.96	0.03	0	1.36	58.36	0	0	8.12	4.27	0.34	0	0	0	0	0	0	1.23	0	0	0	0	0.01
W3d12433|c0_g2_i1	0	0	0	0	0	0	0	0.05	0	79.87	54.03	22.32	0	17.23	0.13	29.4	0	273.96	12.72	0.13	4.9	0.06	14.79	32.72	0	0.36	0.03	5.21	0	0	3.05	20.77	0.05	0	4.72	0.97	0	0	0.07	0.09	0	0.12	0.08	1.12	0.03	0	0	0	0
Contig42524	0.25	0.26	0.8	0.09	0.15	0.31	2.51	1.6	4.12	4.32	4.25	2.99	12.86	1.19	3.57	11.92	2.58	4.58	11.14	3.51	3.03	9.02	0.7	2.62	0.78	0.65	2.02	1.8	1.15	1.06	0.46	3.93	0.5	0.58	0.6	0.45	0.59	0.66	0.89	1.38	0.27	0.21	0.41	0.33	2.23	1.77	1.39	0.68	1.65
Contig22056	0.36	0.82	0.52	0.94	2	0.93	0.84	37.59	7.65	2.04	0.25	8.93	13.78	1.51	6.69	3.24	1.81	4.6	13.63	5.68	3.36	1.06	1.18	0.56	3.05	1.37	4.78	2.56	2.69	9.73	2.79	4.42	0.47	3.33	2.22	1.21	0.96	0.32	1.35	1.51	1.18	0.85	0.5	0.43	9.05	2.71	1.71	2.1	1.52
W4a14527|c0_g1_i1	0	0	0.16	0	0	0.03	0.75	4.01	2.42	1.84	1.18	1.7	13.28	0.33	1.18	0	2.25	0	12.09	0.43	1.23	2.68	0.55	3.3	1.63	0.89	0	0.32	0	0.19	0.41	2.15	0	0	1.64	0.63	0	0	0	0.28	0	1.58	0	0	0.78	0	1.21	1.58	0.25
W4a24590|c0_g1_i1	0.17	0	0	0.73	0.15	0.21	1.85	0	1	3.29	6.83	2.16	2.74	1.2	0.6	0.32	0.84	3.29	1.22	0.77	0.55	1.84	0.49	2.36	3.76	0.32	0.32	1.56	3.49	1.88	0	1.45	0	0.86	0	0.56	0.22	2.09	0.21	1.36	0	0	0	0	0.35	0	0.43	0.28	2.56
Contig19720	8.56	4.59	6.83	6.19	4.77	6.19	8.91	11.09	14.78	21.08	30.12	17.49	29.91	19.29	11.55	17.24	13.16	15.26	10.71	27.69	15.43	11.34	16.26	7.19	9.2	7.72	8.06	16.38	13.65	8.01	9.34	14.07	9.53	6.42	5.54	9.21	6.97	7.78	12.62	11.57	5.97	5.72	2.63	4.45	12.83	7.84	6.79	16.73	8.88
W3d21146|c0_g1_i2	0.1	0.35	0.09	0.13	0.71	0.28	0.56	2.36	0.1	0.09	2.99	1.02	1.19	0	0.23	0.05	0.05	0.32	0.37	0.82	1.26	0.22	4.41	0.36	0.33	1.11	1.28	0.04	1.6	0	1.58	0.8	0.88	0	0.69	0.21	0	0.73	0.44	0.72	0.17	0.36	0.28	0.61	0.69	0.15	0.86	0.1	0.08
Contig40005	0.09	0	0.3	0	0.08	0.09	1.74	1	1.72	0.62	0	1.29	2.16	1.09	0.31	0.92	0.35	1.62	0.95	1	1.21	1.34	1.28	1.02	0.31	0.16	0.76	0.44	1.88	0.8	1.05	0.98	0.14	0.18	0.34	0.36	0.12	1.16	0.22	0	0.28	0	0.24	0	1.54	0.91	0.9	0.24	0.55
W4a31180|c0_g1_i1	0.06	0	0	0.05	0.65	0.15	0.06	0.23	2.26	180.67	0	34.34	19.17	154.53	17.12	0.16	7.22	0	5.75	3.08	0	0	2.07	11.34	119.03	38.23	3.36	0.05	0.08	0.06	0.44	20.09	0	0	11.5	1.28	1.21	1.98	0	0.38	0	0	1.02	2.05	1.78	7.67	6.38	0.02	8.6
W2b23979|c0_g1_i1	0.1	0	0.17	0.17	1.21	0.33	0.59	6.52	6.77	23.04	9	19.92	4	11.05	8.95	5.14	5.64	45.19	10.84	12.29	6.09	26.35	3.3	8.12	0.07	8.36	11.77	25.96	21	43.49	0.33	13.58	5.66	0.51	0	5.53	10.41	0.79	0.49	0.8	0	7.37	0.14	3.93	1.76	6.08	0.38	0	0.03
W6b17686|c0_g1_i1	1.85	1.44	1.22	1.72	0.12	1.27	0	2.68	0.28	45.04	0.81	8.84	0.28	0.13	0	1.84	0	9.29	18.01	24.2	9.65	0.39	1.74	25.91	0	4.5	9.04	0	0	13.25	0.08	6.23	0.11	2.76	0.28	0.24	1.41	0.32	0.09	259.01	0.31	0	0.78	0	0.07	3.4	0	3.74	4.35
Contig15805	0.1	0.1	0	0.09	0	0.06	0.47	0.17	0.46	1.35	0.76	0.56	0.08	0.19	0.19	0.1	0.16	38.99	0.19	0.36	0.17	0	2.55	0.55	0.08	0.1	0	0.13	0.31	0.05	0.34	2.34	0.2	0	0	0.43	0.07	0.14	0	0.96	0.06	0	0	0.81	0.16	0.16	0.34	0.26	0.14
W3d24627|c0_g1_i1	0	0	0	0	0	0	0.41	0	0	0.55	0.43	0.3	0	0.36	0	0	0	0	0	0	1.34	0.9	2.4	0.48	0	2.13	0	0	0	0	0	0.4	0	0	0	0	0	1.09	0	0	0	0	0	0.24	0	0.61	0	0.29	0
Contig8728	0.94	0.16	2.45	0.09	0.59	0.84	11.01	4.64	4.52	4.45	3.9	5.45	11.72	1.48	8.09	56.57	5.6	9.31	9.72	4.04	6.6	10.83	2.18	8.05	1.03	1.86	6.02	2.62	2.7	2.66	2.04	8.06	1.55	1.35	1.3	0.45	1.46	1.55	3.76	6.29	0.76	0.68	0.67	0.61	0.92	4.34	2.21	1.36	2.19
W4a20384|c0_g1_i1	0	0	0	0.16	0	0.03	0.37	0.91	0	0	0	0.21	0.29	0	0.66	0.35	0	0	0	0	0.3	0	0.36	0	0.8	0.35	0	0	0	0	0.41	0.19	0	0	0	0	0	0	0.92	0	0	0	0	0	0	0	0	0.1	0.25
Contig41072	0.17	0.03	0.29	0.05	1.46	0.4	3.62	1.76	2.68	3.74	0	2.01	1.08	0.72	7.22	5.26	0.31	0.32	0	0.16	0.07	0.83	1.42	0	0	1.48	0.16	74.13	0.29	9.95	2.55	5.58	0.22	0.06	0.35	0.05	0	12.85	0.03	0.25	0.48	0.23	0	0.03	49.28	0.08	1.72	0.12	0.29
W4a21533|c0_g1_i1	0	0.5	0	0.11	0.34	0.19	1.93	0.21	0.25	0.23	0.94	0.64	1	0.57	0.11	0.12	2.31	2.26	0	0.15	0	0.28	0.76	0	2.6	0	0.5	0.44	0.29	0.66	0.28	0.65	0	0	0.25	0.21	0	0	0	2.56	0.28	0.36	0.18	0.31	0.13	0.19	0.5	0.22	0.47
Contig35429	0.13	0.85	0.38	0.53	0.69	0.52	2.46	0.54	1.53	1.33	0.87	1.21	3.35	3.38	3.34	0.63	1.27	2.09	0.21	0.35	2.16	0.29	0.3	0.41	0.06	1.04	0.89	0.82	0.95	0.09	1.55	1.22	0.21	0.81	0.55	0.48	0.41	1.13	0.38	2.92	0.29	0.37	0.73	0.74	0.6	0.79	1.76	0.72	0.8
W1a23819|c0_g2_i1	1.81	1.44	0.22	0.27	0.31	0.81	5.73	8.39	1.62	7.12	1.12	5.04	1.1	4.52	4.51	4.71	21.44	21.77	1.41	0.7	2.22	2.07	2.91	18.34	1.8	0.58	10.61	1	0.64	2.29	3.33	5.58	0.82	6.7	0.52	0.2	0.17	0.59	3.47	5.28	0.54	0.03	0.71	0.04	0.56	0.91	10.36	5.54	5.9
Contig31007	0.8	1.07	0.68	0.72	0.98	0.85	2.83	1.71	1.3	1.98	1.83	2.12	1.74	1.63	2.6	2.01	4.81	1.69	1.58	2.29	1.82	1.4	2.53	2.95	1.16	1.09	2.81	1.31	1.2	1.51	0.98	1.95	0.85	1.8	0.89	1.11	0.75	0.7	1.66	1.83	0.78	0.44	0.63	0.42	0.78	1.12	2.89	1.42	2.45
W3d12433|c0_g2_i2	0.06	0	0	0	0	0.01	0	0.02	0	162.73	126.58	48.22	0	29.59	0	48.77	0	148.47	12.2	0.03	3.32	0	19.04	57.5	0	0.33	0.03	4.16	0.04	0	3.18	17.19	0.11	0	7.33	1.19	0.16	0.05	0.14	0	0	0.04	0	0.91	0	0	0	0	0
W4a21550|c0_g1_i2	0	0	0.18	0.18	0.12	0.1	0.28	0.8	0.07	3.48	3.43	1.58	3.42	1.56	0.5	2.48	0.84	1.87	1.53	1.36	0.57	0.54	0.21	0.33	2.02	0.99	0.74	0.89	0.26	0.78	0	1.1	0	0.07	0.47	0.12	0.37	0	0.17	0.46	0.45	0.2	0.1	0	0.22	0	0.63	1.45	0.16
W2b23688|c0_g4_i1	0	0	0.15	0.93	0.31	0.28	4.85	1.03	3.38	0.96	1.5	2.62	2.23	6.73	8.19	15.34	0	0.56	7.2	7.43	0.88	10.46	1.06	2.73	0.65	0.51	1.04	6.39	1.6	1.1	2.37	4.03	0	2.39	1.57	1.35	0.24	5.91	3.12	1.85	0	1.51	0.5	0.43	0	1.08	0	0.71	1.19
W5c14401|c0_g1_i5	0	0.37	0.14	0.24	2.24	0.6	4.48	4.39	2.11	14.62	18.59	10.23	14.8	24.41	8.79	14.53	0.66	22.56	4.84	14.47	19.21	15.54	4.53	5.06	6.34	31.03	2.38	21.63	5.29	18.65	10.85	12.93	21.13	0.17	5.32	4.43	3.39	6.28	0.03	11.51	0.33	4	0.57	6.51	1.85	3.11	0.07	6.06	2.43
W7b11564|c2_g1_i7	0.42	4.03	0.85	0.98	1.72	1.6	1.98	7.02	3.77	3.64	17.76	8.48	74.49	15.92	0.19	13.68	9.85	2.47	4.63	17.26	7.11	5.81	34.42	3.14	6.43	0.53	1.09	14.35	2.68	16.13	3.89	12.32	5.19	1.08	6.5	6.64	1.97	4.52	1.84	1.3	17.14	2.97	3.21	2.03	37.48	0.32	2.81	0.61	12.05
W3d20873|c0_g1_i1	0	0	0	0	0	0	0	0.12	13.48	0	0	2.27	0	0	0	0	1.12	0	0.34	0	0	26.99	42.07	0	0.91	0.27	0	0	0	0	0	3.77	0	0	0	0	0	0	1.04	0.41	16.29	0	0	0	0	0	0	0	0
W2b21166|c0_g3_i1	0.08	0.29	0.2	0.26	0.07	0.18	0.38	1	0.15	0.74	2.69	0.88	2.06	1.28	3.99	1.89	0.38	0.39	0.74	1.22	0.62	0.66	2.37	0.18	0.38	0.21	0.66	0.38	0.34	0.46	0.08	0.96	0.95	1.47	0	0.44	0.2	0.67	1.03	0.45	0.33	0.42	0.21	0.18	0.32	0.45	0	0.34	1.48
W5c14401|c0_g1_i1	0	0.44	0.27	0.25	2.81	0.75	4.76	3.65	1.57	12.56	19.34	9.69	13.81	22.59	8.15	12.96	0.45	21.52	5.13	14.02	17.33	12.04	3.72	3.75	3.7	29.69	1.86	9.31	4.61	11.53	11.23	10.92	21.54	0.03	5	4.74	2.97	6.27	0.32	12.75	0.31	3.58	1.41	6.32	1.15	1.78	0.07	5.43	2.13
W6b12636|c0_g1_i4	0.73	1.15	0.27	0.24	2.19	0.92	0.76	0.53	2.96	0.7	2.47	1.32	0.53	0.68	1.71	0.62	1.1	1.42	2.36	2.36	1.52	0.62	0.06	0.89	0.1	4.65	3.35	0.41	2.89	0.37	1.12	1.41	0.4	1.59	1.01	0.42	0.45	0.28	0.77	17.25	0.49	0.99	0.19	0.68	0.53	0.67	4.53	0.84	1.8
Contig29160	0.05	0.1	0	0	0.09	0.05	0	3.58	3.55	2.05	0.8	1.73	0.2	1.05	0	5.45	41.35	28.13	1.06	0.35	0.04	2.19	0.4	0.36	0.07	0.19	13.34	1.26	1.07	0.21	0.17	5.1	5.12	0.47	0	0.09	0	0.09	0.76	4.68	0.72	0	0.07	0.31	0	0.15	0.26	0.16	0.92
Contig15804	0.05	0	0	0.1	0.16	0.06	0.63	0.15	0.98	1.28	0.66	0.65	0.38	0.19	0.34	0.09	0.26	67.54	0.51	0.7	0.23	0.08	2.46	0.55	0.27	0.24	0	0.3	0.33	0	0.13	3.93	0.09	0.17	0.14	0.29	0.28	0.35	0.09	2.96	0.38	0	0	0.59	0.17	0.32	0.69	0.4	0.37
W5c14414|c0_g1_i8	0	1.61	1.43	0.67	0.11	0.76	1.54	1.9	1.9	1.26	1.47	1.48	0.5	1.37	1.49	1.48	8.69	1.85	0.78	1.18	0.52	0.7	2.89	3.15	0.65	0.36	1.61	1.85	3.62	1.05	1.41	1.85	3.51	0.66	0.37	0.11	1.02	0.8	1.43	2.74	1.67	1.26	0.18	0	0.4	2.49	7.09	0.97	0.98
W1a18323|c0_g1_i1	0	0	0	0.17	0	0.03	0	3.03	1.15	7.94	15.99	6.43	2.11	19.71	31.54	2.6	0.97	3.6	2.59	74.15	61.79	4.69	1.71	4.31	0	13.41	1.12	3.12	0.72	0.99	0.43	12.08	0.61	1.59	0.56	0.16	43.3	0	0.96	0	3.99	0.27	0	0	2.22	0	1.5	0.98	0.77
W2b25430|c1_g1_i5	0.08	0	0.28	3.47	0	0.77	0.41	0.47	1.7	10.2	110.13	20.51	1.02	0	129.61	12.09	3.02	0.42	96.63	0	20.24	0	0.08	27.58	3.96	11.16	0	0	0.91	22.46	0	17.33	0.77	1.51	0	3.48	14.79	0.07	16.01	0.6	0.09	0	0.34	0.1	0.51	0	1.79	0.92	6.76
W0d8025|c0_g1_i1	0	1.06	0	1.9	3.29	1.25	1.1	5.42	99.22	14.54	17.38	29.67	23.3	31.64	6.46	17.48	25.38	8.91	33.2	78.82	8.23	38.48	5.08	0.55	13.17	9.22	7.43	21.56	27.67	46.15	16.43	22.06	11.91	8.2	13.71	0.26	6.26	10.05	4.47	11.11	0.68	6.83	6.07	1.32	18.65	2.35	20.2	28.27	5.16
Contig4347	0.12	0.23	0.36	0	0	0.14	0.71	2.14	1.82	1.21	2.72	1.65	0.74	1.43	0.26	32.35	7.92	0	0.65	8.64	1.75	2.99	2.26	0	0.09	0	2.29	1.36	0.53	1.93	0.26	3.44	0.74	6.85	4.02	0.1	0.55	0.47	2.13	0.04	0.39	0.17	0.16	0.07	4.69	0.44	4.12	0.55	0
W5c28617|c1_g1_i3	0.82	1.19	1.41	1.56	3.21	1.64	3.11	1.68	1.78	1.68	12.05	4.36	3.94	3.21	2.12	3.93	3.1	3.29	4.67	3.85	2.15	2.88	2.24	5.56	2.37	2.95	2.92	8.94	3.47	2.34	2.07	3.47	5.18	1.17	1.75	2.39	1.63	2.11	2.03	12.3	2.57	2.53	1.36	0.39	1.87	1.59	4.63	1.72	3.26
W5c28356|c0_g1_i1	1.27	0.62	0.82	1.29	0.23	0.85	1.64	1.87	1.16	1.23	1.27	1.45	1.77	1.04	1.61	3.15	0.9	1.97	1.22	3.9	1.39	0.52	1.82	1.74	0.88	1.41	1.59	0.63	1.02	0.97	0.88	1.5	2.28	0.92	1.29	0.88	1.55	0.8	0.99	1.21	0.63	1.64	1.17	0.7	0.5	1.19	1.5	0.98	1.81
Contig20202	0.27	0.66	0.53	0.39	0.42	0.45	4.9	2.17	2.17	5.52	2.11	2.97	1.84	6.2	7.13	4.87	3.35	6.15	1.17	3.46	1.07	1.81	2.18	2.21	1.91	1.14	2.94	2.64	1.35	1.4	1.36	2.85	0.75	1.33	0.47	0.57	1.78	1.89	2.12	3.94	1.63	1.06	0.57	0.16	0.86	3.74	1.63	0.49	5.11
Contig12773	1.64	0.57	0.47	1.15	1.19	1	2.89	17.72	2.4	6.78	12.68	8.1	15.32	12.29	10.86	4.12	2.65	7.57	4.98	8.12	18.81	3.39	14.88	0.5	6.13	7.88	4.68	6.55	1.97	1.71	1.81	7.06	1.16	0.88	3.79	9.73	4.72	3.02	3.72	17.7	3.09	2.14	0.32	2.48	8.5	1.11	6.63	4.1	1.92
Contig29125	0.64	0.57	0.35	0.31	0.28	0.43	0.86	2.76	2.65	4.37	8.11	3.73	2.4	3.24	4.18	2	2.08	1.97	5.08	4.69	4.46	3.59	4.18	1.59	0.98	2.24	1.75	2.54	1.49	4.4	3.4	2.96	1.63	1.67	1.76	1.1	1.69	0.93	1.97	2.18	1.92	1.15	0.56	0.93	2.7	1.83	1.23	3.11	1.51
W6b12701|c0_g2_i1	0	1.48	0.33	0.17	0.17	0.43	1.53	228.25	57.53	69.42	246.61	106.22	382.5	58.1	17.25	62.53	134.19	60.31	90.78	45.21	19.72	27.71	4.12	37.13	27.35	43.99	15.13	32.87	36.94	14.04	18.1	59.37	2.39	27.96	11.49	5.73	6.6	1.87	4.26	69.57	5.18	7.51	2.37	0.46	15.72	6.58	0.49	50.85	3.61
W0d22155|c0_g3_i1	0	0	0	1.92	0.48	0.48	25	2.63	21.87	2.6	0.73	9.05	72.5	1.24	1.74	2.53	0	1.15	2.36	0.64	16.04	64.4	0.68	0	63.36	5.79	0	24.25	1.24	54.43	0.76	16.48	0	0	0.4	0.58	2.4	0.86	0	40.54	0.3	0.39	0.77	1.17	0.14	0	0	0.47	1.38
W6b12701|c0_g7_i1	1.15	0.55	0.33	0.99	0.5	0.7	2.29	54.82	51.66	334.85	96.57	96.06	243.57	57.58	103.85	92.42	110.55	71.74	35.52	98.75	42.11	11.34	15.72	18.56	21.13	26.25	6.64	23.32	40.35	15.4	34.72	56.29	3.73	17.21	25.02	6.53	0.51	16.48	6.39	98.58	1.24	3.49	2.11	1.15	13.93	31.73	3.93	30.7	9.06
W4a31484|c0_g4_i1	0.68	1.14	2.33	2.2	0.44	1.36	94.5	78.82	21.77	32.82	174.62	67.83	24.56	314.18	166.42	23.85	20.58	288.13	35.13	220.02	24.1	91.59	6.63	39.39	21.02	36.84	5.55	23.79	3.14	1.73	48.6	73.43	1.45	48.45	41.82	3.1	5.17	1.8	9.01	66.67	44	3.8	1.17	4.87	4.05	10.37	15.66	21.53	22.43
Contig9584	1	4.54	1.75	1.26	6.45	3	5.32	56.47	8.61	30.03	34.6	24.86	23.61	7.86	18.51	22.15	13.27	6.99	29.15	30.66	11.72	10.14	10.51	6.18	10.04	13.75	30.43	21.25	23.16	22.87	15.94	17.27	16.29	4.47	12.14	10.67	15.25	8.5	11.95	4.9	2.84	3.38	4.65	3.29	6.76	4.91	10.54	17.46	6.44
W4a12654|c0_g2_i1	8.2	19.48	7.52	0.36	10.66	9.24	52.77	114.19	143.33	255.27	825.22	243.97	520.69	106.63	71.02	165.81	48.08	238.54	64.47	113.1	109.57	103.16	183.13	448.56	119.48	34.47	243.14	156.78	22.41	24.52	164.28	154.62	24.87	105.18	157.47	29.86	26.59	52.36	13.42	643.5	53.46	0.97	10.73	13.67	44.41	38.86	64.68	140.41	46.39
W3d4810|c0_g3_i1	0	0	0	0.2	0.96	0.23	0.06	0.1	8.31	200.89	0	36.67	6.2	40.56	131.32	0	62.4	0	44.3	1.27	0	0	44.91	10.5	8.59	5.63	19.46	0.1	0.09	0.89	3.14	19.97	0	0.18	62.48	0.49	10.76	14.66	0	0.73	0	0	4.42	2.66	7.4	10.28	28.7	0.34	38.53
W6b12636|c0_g1_i2	0.49	0.89	0.3	0.4	0.88	0.59	1.55	1.28	1.05	1.28	2.16	1.3	0.49	0.49	1.47	0.77	1.67	2.7	2.55	1.69	0.83	1.23	0.08	0.51	0.08	4.55	3.95	0.76	3.4	0.62	1.65	1.55	0.34	1.59	0.36	1.18	0.65	0.41	0.29	13.43	0.66	0.69	0.44	0.83	0.6	1.03	4.67	0.73	1.39
W6b3661|c0_g2_i2	0.28	0	0.12	0.08	0.2	0.14	1.07	2.64	0.28	1.04	1.61	1.23	1.38	3.66	0.33	4.92	3.53	2.16	0.68	1.61	1.72	5.48	0.37	0.22	0.57	0.13	0.81	0.36	0.59	1.14	0.31	1.58	0.11	0.33	0.36	0.58	0.19	0.5	0.63	2.3	2.48	0.65	0.64	0.78	0.34	0.42	0.42	0.61	0.91
W3d28097|c0_g1_i1	0	0	0	1	0	0.2	7.79	69.75	0	1.03	19.55	16.35	36.81	5.32	0	0.95	2.64	11.28	25.57	0	5.43	4.73	12.5	7.76	0	6.59	2.24	94.64	47.19	6.76	0.73	14.27	0.65	4.58	0	8.15	0.22	0	5.95	0	10.42	13.72	6.17	0.6	1.55	0.5	2.77	42.7	7.2
Contig10943	3.99	4.53	4.39	2.48	12.84	5.65	9.1	111.91	294.34	163.96	42.71	139.71	289.29	105.84	108.98	43.74	125.68	130.4	179.5	270.78	57.71	122.71	112.29	64.71	32.13	86.6	135.54	115.43	113.2	137.5	72.62	121.3	57.52	22.08	94.54	50.26	48.84	27.97	28.23	68.85	92.26	13.25	10.76	42.55	202.89	45.25	45.03	133.69	24.77
W6b12639|c1_g1_i2	0.36	1.2	1.03	0.8	2.55	1.19	3.44	17.56	1.15	21.16	15.03	10.84	24.64	11.3	9.4	2.92	8.86	2.43	17.59	7.07	5.37	5.93	8.42	7.91	2.14	11.06	17.03	11.49	8.86	9.8	7.18	9.44	4.85	2.78	5.9	5.7	4.41	3.02	5.35	24.56	4.9	3.87	2.93	2.74	8.17	5.51	11.78	11.72	7.39
W1a22770|c0_g1_i1	1.3	0.57	0.95	1.35	1.36	1.11	3.19	5.03	10.64	4.7	5.1	8.33	13.61	6.91	11.59	20	14.68	2.62	8.55	5.61	7.95	8.87	4.21	5.64	4.57	3.21	13.21	5.02	8.91	13.83	5.95	8.68	3	3.87	2.4	11.02	7.27	7.64	16.46	1.97	3.18	2.1	3.51	2.19	4.95	13.64	6.79	2.34	3.87
W3d28490|c0_g2_i2	0	0	0	0	0	0	0	4.3	3.61	15.91	1.31	5.01	38.98	0	1.42	0.11	0.45	38.27	2.35	2.61	3.26	3	28.98	0.53	0.08	1.94	1.65	88.62	5.33	2.79	0	11.6	0	23.4	0	0.28	2.27	0	4.23	1.34	14.31	0.32	1.57	0	0.12	0	0.88	6.61	6.04
W5c19707|c0_g1_i1	0.29	0	0	0.25	0.77	0.26	0.15	0	6.71	0.26	1.54	1.44	0.69	0.13	0.26	0	0.15	5.77	0.18	5.58	0.12	0.65	0	0.34	0.21	0.14	2.13	0.75	0.66	2.1	2.76	1.19	1.73	0.6	1.29	0.37	0.39	1.96	0	0	0.32	0	0.81	3.54	0	0	0	0.58	0
Contig30146	1.66	0.85	1.86	1.23	1.65	1.45	12.98	7.75	7.2	8.31	7.38	8.59	11.76	8.74	8.85	8.69	15.44	5.13	9.65	11.14	7.48	4.34	10	12.5	6.77	5.51	9.17	7.25	6.48	7.93	3.76	8.45	5.68	6.88	5.15	6.87	5.03	4.69	6.45	9.84	4.32	4.98	2.33	2.15	5.1	5.01	9.13	7.32	6.65
Contig5920	2.86	0.9	1.49	6.5	2.06	2.76	1.92	6.18	14.69	14.98	32.22	12.14	4.77	9.13	8.44	33.36	39.01	6.28	16.9	13.33	3.51	39.56	2.92	2.03	1.62	27.52	1.26	14.1	0.32	76.08	5.47	16.08	1.02	5.34	7.89	6.93	7.43	4.14	10.69	35.64	2.89	11.67	1.71	0.52	5.17	1.39	50.63	6.7	127.93
W5c22968|c1_g1_i3	0.99	0	0.08	4.45	3.7	1.85	2.27	0.16	72.72	37.05	3.41	21.88	49.59	13.13	31.63	1.33	1.58	0.31	13.09	38.59	1.78	51.57	5.23	3.01	21	5.15	8.59	13.23	2.5	43.97	2.83	16.22	60.35	3.64	0.48	2.96	4.33	4.39	5.75	0.58	5.04	7.21	3.82	9.85	0.72	5.32	3.18	4.99	30.52
Contig7967	0.05	0	0	0	0.13	0.04	0	0.52	6.02	0.22	0	1.23	0.04	0.66	5.44	0	0	0	0	0.56	0	5.5	1.25	1.95	1.03	0.05	0.28	0.96	1.42	0	0	1.01	0.46	0.1	1.38	0.04	0.2	0.52	0.24	0.07	0.05	0	0.14	0	0	0	0.5	5.13	0.28
Contig29168	0	0	0	0	0	0	0	0.35	0	2.16	0	0.42	2.33	2.42	0.13	0.27	0	0	0.35	0	0	0	1.68	0	0	0	0.28	0	0	0	0	0.39	2.57	0.44	0	0	0	0	0	0	0.31	0	0	0	0	0	0	0.56	0
W6b20076|c0_g1_i1	0	0.38	0.17	0	0.52	0.21	1.38	0	2.15	0.88	7.62	2.53	5.67	4.4	1.94	11.93	0.59	0.81	0.48	4.53	5.01	3.25	3.67	1.39	0	0.37	0	0.84	0.73	0.6	0.43	2.46	1.23	0.61	0.96	0.16	0.52	2.81	2.2	5.09	1.28	0	0	0.47	1.03	2.36	0.76	0	5.63
W3d981|c0_g1_i1	0	0	0.14	0.29	0.15	0.12	0	11.01	10.77	18.18	0.35	6.84	0.13	0.9	0	0	1	6.04	22.98	7.69	12.2	3.13	41.81	4.9	1.33	0.32	0	0	13.19	0.34	11.61	6.71	0	2.23	3.73	0.42	11.79	11.16	8.29	1.36	0.18	4.7	0	2.21	0.17	0	0	0.23	5.66
W3d28097|c0_g2_i1	0.17	0	0	0	0	0.03	17.06	189.9	0	0	42.22	41.53	100.52	3.69	0	0.8	1.32	28.89	62.21	0	18.33	2.55	25.97	2.72	0	4.55	0.64	14.32	41.89	6.93	0.18	16.61	0	1.02	0	1.52	8.15	0	18.68	0	18.33	11.63	19.21	0.99	3.11	0.25	1.07	45.96	4.29
Contig2682	1.45	0.58	0.69	2.65	1.09	1.29	11.72	7.41	18.2	6.47	36.09	14.42	28.28	15	14.06	6.68	13.74	4.8	11.2	12.43	15.59	4.18	17.66	9.03	6.7	7.83	8.41	16.81	7.86	4.96	9.6	11.31	6.54	9.99	7.63	4.88	6.79	8.19	5.34	13.7	4.45	3.02	3.25	1.08	9.65	5.02	6.51	9.03	12.84
W0d4837|c0_g1_i4	0	0	0.14	4.38	0	0.9	0.08	1.21	1.7	12.41	218	38.99	0.95	0.44	116.16	9.54	3.66	0.76	186.61	0	21.64	0	0.4	45.14	8.54	20.85	0	0.07	0.73	34.69	0	23.69	1.4	0.92	1.9	4.21	13.11	0.07	30.3	0.36	0	0	0.11	0.1	1.02	0.12	2.2	1.35	11.33
W7b11564|c2_g1_i5	0.36	2.31	0.53	0.49	1.91	1.12	1.74	9.5	3.14	5.64	13.82	8.43	63.79	16.62	1.63	7.18	5.85	4.66	9.54	10.69	3.19	2.96	32.68	1.77	5.01	1.25	4.09	12.26	4.61	7.52	6.14	10.6	4.67	1.29	5.74	6.64	2.53	3.12	8.23	0.62	14.93	1.93	2.13	2.69	45.38	1.72	1.77	3.74	10.95
Contig39069	0.69	0.29	0	0.34	0.78	0.42	0.84	6.96	13.04	10.97	10.7	8.15	26.56	3.79	1.11	2.04	15.89	18.73	27.48	9.09	6.89	5.22	4.41	6.72	1.68	6.8	10.37	4.7	13.25	3.69	9.92	9.39	5.07	0.71	3.7	8.95	0.66	2.07	6.19	6.38	0.97	2.71	1.09	0.36	8.45	15.25	3.31	4.2	3.2
Contig35078	0.45	0.29	1.04	0.26	0	0.41	0.61	0.62	2.4	0.27	6.79	1.81	0.59	0.4	2.16	0.87	0.3	0.31	1.84	1.22	1.24	0.66	2.82	1.24	0.33	0.72	0	3.85	2.02	1.08	1.33	1.21	1.18	0.15	0.44	0.25	1.41	0	3.37	1.45	0	1.27	0.21	0	0.79	1.81	2.14	0.47	0.75
W7b5990|c0_g1_i1	0	0	0	0	0	0	41.55	0	0	0	0	6.92	0	0	0	0	0	0	0	0	126.05	0	0	0	0	0	0	29.83	0	0	13.43	8.91	0	0.7	0	0	0	41.53	0	0	0	0	0	0	2.33	9.76	0	0.87	0
W5c14401|c0_g1_i2	0	0.28	0	0.19	11.3	2.35	18.85	4.27	5.4	6.06	24.69	16.8	10.15	15.57	8.05	7.9	3.25	12.65	23.17	7.57	11.25	81.69	4.02	8.7	4.15	11.51	0.78	5.03	7.4	84.76	34.27	17.99	16.23	0.07	3.27	4.3	11.39	31.05	0.32	6.85	0.08	1.54	0.3	2.81	2.4	11.23	0.09	5.35	5.51
Contig16199	0.31	0.25	0.65	0.09	0.36	0.33	2.19	29.42	9.65	1.35	4.05	8.41	10.59	2.44	6.08	3.53	5.98	21.67	8.8	2.36	3.61	4.07	4.52	1.92	1.66	2.2	2.24	9.54	1.65	9.28	2.5	5.51	2.28	2.64	1.82	2.3	1.84	0.74	2.61	6.74	0.99	2.41	0.61	0.66	2.39	2.11	2.72	4.4	0.83
W7b14732|c0_g1_i1	0	0	0	0	0	0	40.35	0	0	0	0	6.72	0	0	0	0	0	0	0	0	128.72	0	0	0	0	0	0	28.83	0	0	15.25	9.09	0	2.2	0	0	0	48.48	0	0	0	0	0	0	3.13	13.17	0	1.38	0
W1a21199|c0_g1_i2	0.5	0	0	0.29	0	0.16	0.67	4.82	9.45	29.96	28.49	14.12	6.5	8.36	6.13	99.27	55.76	1.04	15.66	23.07	4.11	43.77	0.49	0	0	26.96	0	10.92	0	91.04	7.74	21.1	0	2.57	5.03	4.46	7.56	2.53	8.5	22.45	2.54	5.87	0.46	0.4	3.14	0	50.82	15.07	145.29
W1a23866|c1_g2_i1	1.32	1.84	1.94	1.47	2.41	1.79	3.14	2.73	2.98	3.99	3.3	3.47	3.3	3.03	3.24	5.54	5.33	5.09	4.09	3.66	1.95	2.75	2.65	4.86	3.31	2.47	3.5	3.91	1.73	3.46	2.9	3.51	3.11	2.18	2.9	3.44	2.89	2.84	2.92	2.63	2.64	2.1	2.2	1.95	2.93	3.52	4.17	3.5	2.51
W4a13069|c0_g1_i4	1.47	1.12	1.37	0.4	0.95	1.06	2.04	1.68	2.02	3.57	1.42	1.92	1.64	1.15	1.61	3.05	3.94	1.24	1.52	1.5	1.11	4.13	0.58	1.09	6.04	1.34	1.31	0.64	1.7	2.46	0.83	1.94	2.8	3.73	1.37	1.21	0.86	0.6	1.31	0.75	0.56	2.11	3.97	1.33	1.34	4.25	2.39	1.4	1.73
Contig44202	0.62	1.55	1.72	0.79	1.3	1.2	4.43	18.03	1.77	26.88	8.81	10.82	12.57	9.41	8.38	3.77	12.68	3.89	16.29	6.29	3.85	7.75	5.18	5.44	2.82	7.82	10.58	8.08	5.92	9.54	3.32	7.56	4.8	4.56	4.79	3.36	3.73	2.11	2.98	11.71	4.26	4.24	1.51	0.77	17.39	7.87	5.81	5.84	3.79
Contig8927	1.45	0.55	0.13	0.09	1.44	0.73	8.11	29.94	21.69	88.9	32.63	32.37	101.47	23.9	20.18	11.55	28.29	6.45	43.8	33.04	20.86	6.81	21.71	4.96	4.11	20.75	20.25	24.07	18.05	10.59	11.15	22.74	4.56	33.03	7.81	6.8	3.71	10.88	15.87	7.39	5.32	3.26	2.57	0.93	14.74	15.76	6.11	15.67	5.23
Contig9974	2.82	1.08	1.69	2.32	3.38	2.26	17.55	17.17	18.9	22.38	34.11	29.17	46.4	11.38	24.95	11.21	11.52	16.64	14.11	43.21	20.36	22.24	27.87	18.36	11.32	25.51	15.02	52.17	28.3	24.29	18.1	23.31	18.32	7.47	11.46	19.36	3.66	9.09	4.16	35.04	11.41	7.1	3.89	2.08	11.88	8.38	6.81	27.81	14.82
Contig3478	1.56	0.6	3.09	2.77	3.61	2.33	5.23	37.6	38.26	181.06	69.93	111.06	44.57	87.06	11.23	43.52	34.03	126.73	46.95	79.16	27.75	120.24	76.61	41.66	0.45	49.47	42.88	99.22	100.75	177.15	17.28	64.56	32.77	6.87	0	24.13	65.88	7.84	4.35	2.53	0.68	23.77	5.71	20.9	14.07	21.02	0.5	0	7.69
W4a31484|c0_g5_i1	2.61	0	1.03	0	0	0.73	15.22	16.14	9.13	9.46	37.66	14.74	13.38	125.04	22.21	0.38	2.4	43.6	15.34	49.01	2.13	9.69	0.2	12.66	76.32	11.2	21.47	34.8	0.3	0	20.3	24.23	0.31	9.64	7.58	1.5	0.53	1.78	2.73	2.81	7.6	3.94	0.28	1.92	11.89	3.3	1.8	46.13	2.46
Contig6070	0.6	0.58	1.27	2.13	5.29	1.98	1.48	30.44	16.19	99.04	24.04	114.63	18.48	60.36	3.28	29.13	16.53	115.01	69.7	84.03	27.1	87.96	13.34	10.69	0.36	38.23	28.62	137.08	43.83	74.78	5.54	45.48	28.09	6.71	0	23.84	68.4	3.84	2.78	0.89	2.13	39.21	2.26	13.92	5.47	10.31	0.07	0	5.53
W1a24986|c0_g1_i2	0.81	0.85	0.45	0.55	0.46	0.63	0.99	0.49	1.12	0.5	0.37	1	0.85	0.6	0.41	1.15	0.7	0.76	0.73	1.34	0.92	0.58	0.69	1.36	0.89	0.94	1.7	0.72	0.55	1.15	0.85	0.89	0.61	1.01	0.86	0.82	0.98	0.75	0.74	0.62	0.77	0.64	0.88	1.86	0.62	1	1.23	0.71	0.59
Contig42272	0.39	2.94	3.5	0	0.17	1.4	26	7.82	21.14	4.67	20.67	13.47	0.5	3.06	19.37	27.13	9.49	4.6	5.74	111.22	0.85	41.93	26.3	3.33	2.62	2.33	0	10.69	1.15	80.6	9.4	18.96	0.46	3.05	2.64	1.51	1.46	7.59	2.97	13.49	11.78	0.09	3.21	2.64	27.02	1.94	1.83	1.8	2.36
Contig14982	2.26	1.33	2.2	2.72	4.09	2.52	13.57	21.61	6.07	12.22	15.13	13.56	67.75	8.35	14.86	7.11	1.79	15.04	13.78	10.75	6.82	7.07	34.89	11.14	2.18	9.94	9.39	10.36	13.97	6.41	11.08	13.83	6.25	6.43	4.61	1.96	4.82	7.46	2.64	9.39	4.7	4.15	1.68	2.53	6.16	4.33	8.24	13.72	7.23
Contig35951	0	0	0	0.09	0	0.02	2.18	11.54	7.06	64.54	7.44	22.13	96.75	51.77	26.85	2.4	13.73	81.55	23.21	16.87	10.74	2.63	2.51	6.75	18.29	4.64	9.72	10.01	0.45	0.33	0.66	19.99	3.83	3.45	3.69	7.07	0	0.24	3.24	8.98	0.12	0.38	0.15	0	8.9	12.94	10.15	1.17	4.51
W3d23975|c0_g1_i3	0.45	2.11	0.9	0.09	0.74	0.85	0.4	19.74	5.89	22.61	14.92	11.37	7.59	7.65	4.74	4.62	1.88	0.87	9.34	4.84	7.84	4.09	10.59	3.43	1.72	9.49	3.64	9.71	6.97	6.07	4.32	5.76	3.45	1.93	6.21	1.69	1.58	2.87	4.12	0.48	1.4	1.25	0.48	0.42	5.11	3.04	4.21	4.98	4.29
Contig41766	0.15	0.15	0.09	0.09	0	0.09	0.7	3.78	1.63	11.48	2.3	4.3	17.7	8.11	5.14	0.77	2.99	12.42	4.19	3.79	2.09	0.6	0.73	0.64	4.01	1.14	1.83	3.43	0.33	0.05	0.22	3.69	1.56	0.61	1.65	1.21	0.13	0.13	0.43	1.66	0.22	0.14	0	0	19.41	3.59	0.96	0.52	1.26
W2b19557|c0_g1_i1	0.71	0.52	0.15	0.31	0.15	0.37	1.6	0.73	8.8	0.32	2.41	2.31	0.83	1.58	9.69	0.34	0.71	1.47	0.86	0.61	0.87	1.17	2.61	0.62	0.77	2.86	0.17	1.66	1.06	0.91	0.98	1.57	0.14	0.36	0.86	2.07	0.24	1.58	0.88	0	0.39	0.5	0	2.13	2.59	2.13	1.37	0.2	0.47
W7b11518|c0_g1_i1	0.74	3.28	2.31	0.64	2.27	1.85	1.21	27.44	9.15	26.09	14.83	15	9.95	7.33	9.79	16.89	6.85	5.6	12.58	9.17	13.43	9.03	6.5	6.79	3.29	10.16	10.94	15.54	9.11	14.31	6.44	9.67	6.53	1.95	4.37	3.13	3.33	5.37	11.96	1.44	1.11	1.82	1.28	1.56	10.3	3.13	7.35	12.55	4.54
Contig16735	1.65	0.08	0.37	1.42	0.6	0.83	0	1.49	1.71	1.39	4.97	1.79	1.34	2.85	3.09	1.16	0.35	0.36	0.11	4.07	1.7	0.29	1.36	0.71	0.44	1.31	2.34	3.01	4.38	0.18	2.1	1.64	0.27	1.15	7.22	0.72	0.46	0.38	0.86	1.34	0.19	0.36	0.24	0.21	2.7	2.07	1.78	0.22	0.6
W4a18295|c0_g1_i2	0.25	0.41	1.17	0.44	0.37	0.53	6.36	1.81	3.19	0.53	6.2	3.45	1.51	1.44	2.96	4.15	1.52	3.23	8.14	6.62	3.47	0.47	2.49	0.89	6.56	1.04	5.16	1.87	0.38	3.03	4.2	3.11	0.66	0.35	0.25	0.85	3.15	1.51	4.2	1.94	0.18	0.59	0.82	0.1	1.32	1.14	2.29	2.59	1.88
Contig39720	0.05	0.05	0.12	0.08	0.16	0.09	0.66	0.81	0.93	0.58	0.88	0.65	0.66	0.38	0.29	0.36	0.23	0.87	0.51	0.43	0.19	0.21	3.17	0.05	0.31	0.76	0.68	0.6	0.28	0.91	0.78	0.61	0.26	0.24	0	0.23	0.12	0.58	0.23	0.76	0.36	0.07	0.52	0.11	2.1	0.21	0.36	0.83	0.86
W1a24976|c0_g1_i1	0.27	0	0.54	0.08	0.16	0.21	0.54	1.04	0.71	5.06	0.94	2.13	4.34	2.25	0.65	0.95	0.45	3.44	2.52	3.83	0.89	0.3	2.03	0.74	0.52	0.43	2.35	3.06	1.54	0	0.3	1.61	0.42	0.55	0	0.23	1.56	0.96	2.57	0.66	0.2	0.51	0.25	0.43	2.82	1.48	0.35	0.81	0.66
Contig42992	0.48	0.07	0	0.77	0.48	0.36	8.07	2.75	4.6	0.49	0.64	2.78	1.12	0.43	0.61	0.13	0.41	1.06	4.98	2.67	1.68	0.6	2.54	7.84	0.1	7.45	0.59	6.37	1.22	1.6	0.9	2.23	0.91	0.98	3.32	1.25	3.73	0.24	0.42	0.3	0.22	0.29	0.09	2.13	19.58	0.72	0.18	0.35	0.66
Contig44332	2.17	0.78	0.61	1.7	1.49	1.35	4.29	8.96	2.8	10.69	7.37	6.38	6.15	7.6	7.08	3.05	2.01	4.79	8.15	11.24	7.35	4.93	1.88	1.42	3.46	7.26	4.92	7.14	6.45	3.04	5.22	5.43	1.38	2.58	4.7	3.91	2.55	3.77	1.75	3.35	2.35	0.99	0.63	2.36	9.09	1.74	4.09	6.97	5.32
Contig43538	2.08	2.32	3.01	2.34	2.86	2.52	4.58	2.73	4.12	3.51	2.88	3.85	3.47	3.38	4.49	3.7	4.11	6.95	2.67	3.13	3.72	4.16	3.92	3.72	2.94	3.25	3.37	2.81	3.1	2.23	2.36	3.55	2.44	3.66	2.86	3.73	2.77	3.61	4	3.26	2.63	3.4	3.81	4.54	2.5	3.32	3.59	2.58	4.83
W5c15264|c0_g1_i1	0.74	0.33	0.52	0.23	0.24	0.41	1.35	1.78	0.94	1.63	2.12	1.48	1.1	1.15	1.39	1.23	0.61	1.53	2.3	3.34	0.66	1.56	1.46	1.19	0.39	1.54	0.91	0.57	1.11	1.66	0.82	1.29	1.59	0.83	1.18	0.85	1.08	0.72	0.59	0.8	1.17	0.57	0.09	0.08	1.62	1.21	2.44	1.48	0.65
W4a31484|c0_g4_i2	1.01	1.14	3.48	3.36	1.32	2.06	172.5	96.78	281.44	310.28	212.03	196.35	142.28	552.03	236.4	37.23	85.8	435.45	48.57	264.01	45.32	101.55	14.7	53.9	39.14	42.02	28.17	131.78	8.28	1.2	73.18	123.21	2.64	104.59	58.56	20.52	19.28	4.65	23.82	123.44	53.95	11.36	6.28	10.73	32.85	11.36	14.54	125.57	29.09
W1a18350|c2_g2_i2	0.73	0.61	0.72	0.54	2.74	1.07	1.15	33.68	7.78	128.01	79.43	89.92	4.07	43.16	4.96	26.14	10.35	46.26	20.37	67.15	13.91	6.33	27.51	11.9	0.53	17.07	9.71	57.36	15.81	69.61	21.81	24.95	15.16	18.44	1.83	22.88	57.94	3.45	1.17	5.33	8.18	24.99	1.59	10.19	12.55	4.39	2.02	0.18	9.07
Contig42271	0	0.5	0.13	0.13	0.71	0.29	5.42	3.6	20.36	15.4	31.46	13.36	8.7	8.07	4.84	4.2	7.33	1.91	0.45	19.17	4.74	12.39	7.56	3.13	15.5	5.55	0	9.49	3.81	12.27	3.6	6.99	2.55	8.43	4.61	2.16	4.64	1.12	0.46	5.52	3.14	1.98	1.23	3.92	3.48	3.33	1.15	2.06	4.77
Contig45135	0	0.67	1.03	0	0.41	0.42	11.13	4.31	33.97	0.54	43.9	16.19	7.38	2.72	2.23	38.82	32.97	1.46	1.83	0.35	4.82	29.42	0.38	16.15	4.1	17.14	2.49	12.57	2.46	57.03	0.95	12.38	0.17	0.53	0.67	5.84	1.2	17.31	13.05	2.31	4.57	1.69	0.18	0.1	12.49	4.57	2.27	0.28	64.8
W6b24968|c0_g1_i1	5.45	2.01	2.5	2.84	2.05	2.97	17.5	5.03	20.1	6.4	5.53	10.11	5.9	6.55	8.24	9.14	5.13	10.96	23.43	6.43	9.18	3.67	8.57	6.95	6.44	2.75	6.47	7.16	10.58	7	4.75	7.86	5.19	5.39	3.65	2.93	6.71	2.94	11.03	48.25	2.12	5.5	3.25	5.77	2.71	4.21	8.7	3.62	12.33
W5c20303|c14_g3_i2	0.91	0.67	0.24	1.87	2.55	1.25	140.21	37	439.01	77.61	64.38	130.16	86.75	356.98	31.45	66.99	48.09	451.07	40.55	88.97	46.91	16	12.76	34.66	4.99	14.45	16.95	91.45	5.91	4.48	181.76	84.27	107.41	38.5	26.42	14.81	15.37	3.78	4.14	62.28	17.22	15.35	0.58	6.36	9.07	19.49	9.5	13.6	26.02
Contig37879	2.06	2.36	1.49	3.64	2.41	2.39	4.28	16.45	2.95	13.98	10.53	10.14	40.87	2.9	11.95	4.5	3.57	8.7	4.25	18.25	9.11	4.08	6.69	4.41	3.57	11.38	3.64	8	5.79	5.87	11.8	8.91	3.2	6.24	5.1	3.66	3.5	5.26	3.16	22.43	3.7	2.02	4.38	1.95	3.81	4.26	6.31	8.46	4.93
Contig44201	2.14	1	1.5	1.47	2.36	1.69	4.62	48.22	1.07	18.54	39.26	23.77	31.52	12.44	12.96	3.16	10.87	1.37	24.66	10.26	9.27	5.89	22.92	9.16	8.91	6.88	8.7	25.71	9.46	11.32	8.62	12.32	9.48	6.29	7.28	7.2	2.71	1.82	6.64	12.48	9.04	5.7	2.75	1.51	12.22	8.58	5.44	16.68	6.25
Contig6120	1.64	0.91	0.99	1.42	1.94	1.38	2.92	3.35	3.93	7.03	8.93	5.86	5.7	6.39	6.56	6.14	2.19	4.02	6.85	10.43	3.65	2.71	5.04	2.12	1.96	3.69	2.52	5.92	4.14	4.97	4.06	4.69	2.42	2.38	2.43	2.38	3.37	3.22	3.49	4.95	4.3	2.24	1.54	2	3.37	2.5	3.8	4.61	5.49
W4a25398|c0_g1_i1	1.06	0.3	0.8	1.18	0.98	0.86	3.92	1.02	2.65	1.88	1.49	2.15	2.85	2.33	2.56	2.98	2.73	1.09	1.96	4.43	0.82	1.44	1.46	1.6	2.34	0.77	2.34	1.53	1.25	1.27	1.23	1.95	1.31	1.53	1.09	1.5	2.23	0.61	1.31	1.79	1.89	0.96	0.86	0.3	1.1	1.02	1.68	1.15	2.23
W6b12701|c0_g3_i1	0	0.18	0.16	0.33	0	0.14	18.53	145.47	11.35	52.58	140.06	81.78	285.73	38.67	28.87	46.39	58.52	25.62	46.9	56.62	7.67	18.26	3.18	7.6	27.63	39.28	12.92	42.26	36.94	17.16	24.41	43.4	1.94	14.86	15.57	3.03	2.79	1.19	3.55	62.25	3.94	2.68	4.75	0.23	23.49	12.58	1.72	80.75	2.03
Contig31036	4.09	2.78	5.64	6.66	22.52	8.34	36.33	46.65	48.84	29.26	83.78	45.16	28.9	102.92	61.61	110.71	13.15	39.69	33.25	51.8	97.74	50.58	21.83	13.55	7.69	19.65	1.62	46.5	11.69	32.57	28.08	40.71	19.52	20.13	9.67	18.29	21.44	28.44	34.32	13.71	10.01	5.35	5.63	5.14	8.02	7.31	33.66	24.7	21.04
W4a31484|c0_g7_i1	0	0	0	0.51	1.02	0.31	27.96	12.86	33.13	125.06	23.69	47.53	74	142.49	31.82	18.4	44.29	77.48	6.42	18.2	12.18	9.67	1.72	18.32	18.66	6.67	29.65	74.59	8.29	2.4	21.76	32.47	0.76	39.23	3.22	15.65	18.46	3.3	9.21	67.9	1.7	0.55	2.16	5.17	6.32	2.63	0.25	47.89	1.56
W6b12701|c0_g1_i1	2.1	0	0.49	1.65	0.5	0.95	125.13	151.75	8.89	538.35	652.24	402.51	749.72	475.5	366.39	95.72	148.29	666.79	483.83	218.36	21.45	17.21	81.79	20.8	14.78	11.95	85.61	161.12	58.96	7.99	34.72	195.84	8.52	81.14	60.23	10.35	8.13	18.52	35.74	59.15	0.83	7.51	11.08	0.92	17.12	134.37	13.52	66.98	30.17
W3d4810|c0_g2_i1	0	0	0	0	0.32	0.06	0	0	6.82	174.46	0.19	30.25	5.93	3.32	3.5	0.54	9.29	0	5.43	0.64	0	0.41	6.93	1.31	1.88	1.76	1.44	0.16	0.14	3.42	0	2.43	0	0	8.49	1.71	0.99	2.98	0	0	0	0	1.03	0	1.16	3.9	3.59	1.62	1.91
Contig35356	0.59	0.29	0.42	0.61	0.58	0.5	1.78	0.91	0.96	1.69	0.86	1.21	0.96	0.81	0.45	0.93	1.07	1.78	1.24	1.37	1.18	1.22	1.13	0.73	0.68	0.68	1.59	0.6	0.86	0.92	0.98	1.01	0.93	0.5	0.42	1.01	0.78	0.61	0.89	2.1	0.4	0.33	0.53	0.2	0.72	0.85	0.78	0.61	1
Contig11834	2.13	0.53	1.48	0.77	1.29	1.24	12.22	8.39	4.25	2.42	8.28	7.7	11.02	8.48	9.61	8.24	6.85	0.78	6.18	6.07	7.79	7.24	3.97	1.65	3.95	1.66	2.02	10.62	7	4.73	3.29	5.85	0.97	1.23	1.47	2.83	5.07	3.6	7.19	3.01	1.56	2.65	0.62	1.48	4.51	2.26	2.08	2.91	9.96
W3d25948|c0_g5_i1	0.67	1.63	3.9	2.04	11.44	3.94	43.9	338.15	349.37	125.08	652.05	262.4	750.22	52.35	42.26	92.02	154.55	409.35	66.84	28.21	100.33	19.04	296.95	79.55	32.96	14.5	217.66	151.54	67.92	17.17	133.02	143.5	31.17	28.06	63.3	20.19	3.58	44.28	12.5	690.75	10.03	0.94	10.22	5.86	27.86	43.29	44.58	40.81	21.87
W5c26845|c0_g1_i1	0.79	0.59	0.99	0.89	0.48	0.75	3.84	1.7	1.79	2.58	2.34	2.48	1.69	3.92	1.07	3.54	2.68	4.99	2.53	2.49	1.83	1.86	1.88	1.68	1.04	0.69	2.18	1.58	1.56	1.93	1.33	2.13	3.2	0.88	1.13	1.87	1.33	0.77	1.52	0.85	1	1.13	0.94	0.93	1.09	2.14	1.45	1.25	2.1
Contig32947	2.93	5.53	3.41	1.31	5.02	3.64	93.86	364.32	293.19	311.3	500.16	279.7	1358.78	161.6	35	109.04	54.74	528.28	49.8	59.01	203.49	22.57	120.22	474.73	38.71	11.68	74.05	224.74	75.18	59.47	106.1	198.27	50.47	54.27	52.95	29.99	15.57	14.44	30.24	240.19	14.08	1.13	11.67	4.82	25.09	18.23	40.16	33.56	25.25
W3d22391|c0_g1_i2	0.15	0.29	0	0.26	0	0.14	3.35	2.13	0.45	1.76	2.55	1.98	2.37	0.95	0.95	1.46	0	1.73	0.93	1.57	0.62	4.18	11.79	0.71	0.44	0.29	0.44	2.58	1.02	1.09	0.5	1.77	1.19	0	1.18	0.51	0.4	1.49	0.75	1.24	0.17	1.28	0	0.18	0.16	0.91	1.18	1.84	0.61
Contig14214	5.45	2.42	4.68	3.44	4.75	4.15	17.96	68.88	7	37.89	120.54	51.21	55.93	24.42	28.43	21.48	43.48	66.22	20.4	48.87	25.45	16.18	24.52	5.69	7.98	23.3	16.35	30.95	31.53	9.77	18.81	27.36	11.74	11.15	11.57	6.14	10.96	15.58	10.76	25.07	13.09	5.37	3.66	4.24	22.7	11.02	10.04	18.33	10.6
Contig5545	5.13	6.33	1.96	1.84	3.57	3.77	225.71	783.75	635.71	1169.5	1284.59	1027.02	1058.78	440.31	419.06	508.48	1166.26	895.33	406.53	308.88	179.33	155.67	72.79	208	103.9	89.96	121.05	215.09	180.52	123.03	122.88	356.62	33.27	102.81	200.69	72.9	23.25	33.49	69.6	218.67	13.07	27.31	12.62	5.01	129.76	172.01	19.77	252.29	36.41
W3d31041|c0_g1_i2	0.27	0.72	0.71	0.68	0.34	0.54	2.08	1.68	1.63	1.81	1.27	1.61	1.89	1.29	0.56	1.96	1.56	0.85	1.71	0.68	1.44	1.64	2.8	1.74	0.42	0.56	1.48	1.69	1.19	0.96	0.6	1.32	0.58	0.68	1.37	1.14	1.35	1.22	0.53	1.18	0.68	0.88	0.54	0.61	0.61	1.41	1.71	1.21	1.09
Contig5602	1.34	0	6.85	0.76	0.13	1.82	2.88	24.73	0	16.69	20.19	16.29	11.21	7.89	9.15	2	13.26	28.46	8.47	7.06	4.72	2.03	3.75	7.31	1.71	4.75	22	13.42	3.52	0	3.31	8.11	1.91	3.97	3.02	3.15	3.55	2.54	8.51	7.51	1.7	1.8	2.66	0.65	5.41	1.65	4.04	4.38	1.07
W2b24547|c1_g1_i1	2.43	0.9	1.12	1.29	2.93	1.74	34.54	7.83	15.17	132.71	244.55	77.93	71.67	29.14	82.47	36.92	11.18	50.86	13.84	16.73	21.88	57.86	11.53	3.94	14.72	27.07	4.51	14.24	10.83	13.53	15.01	26.73	1.75	8.98	8.33	11.67	9.19	16.11	17.12	54.37	2.43	2.36	2.06	2.02	9.73	12.85	13.93	8.27	15.73
W1a16530|c0_g1_i1	0	0	0	1.54	0	0.31	0	0	0	0.1	1.1	1.08	2.08	0	0	0	0	0.69	0	0.77	3.46	0	0	0	0	0.37	0	6.56	0	0	0	0.73	0	0.68	0	0.56	0.44	3.46	0	0.29	1.87	0	0	0	0	2.25	0	0.03	1.33
Contig24546	0	0	0	0.63	0.36	0.2	0	0.77	14.66	0.37	0	3.68	0	0	0	0	0.1	0.11	1.14	0.06	0.09	0	4.07	0.61	0.08	0	0	3.92	9.5	0	10.41	1.58	7.67	0	0	0.91	9.66	0	12.16	0.46	0.56	7.07	0.07	0	2.22	0.47	0.27	0	0
W0d23933|c0_g2_i1	0	0.16	0.42	1.28	0.14	0.4	0.65	1.08	0.97	1.75	2.73	1.28	0.64	0.88	3.07	0.63	0.33	1.01	0.6	0.38	0.54	0.18	0.16	0.57	3.08	2.95	1.26	0	0.12	0	0.36	0.88	2.05	1.51	1.27	0.68	0.87	0.58	2.03	0.36	1.6	2.07	0.9	0.2	0.34	1.47	0.42	0.05	1.14
W5c21430|c0_g1_i1	0	0.73	0.32	0	0	0.21	0.56	0	1.86	0	0	0.57	0.44	0.17	0	0.36	1.5	0	0	0	0.31	0.62	0.37	1.1	0	2.14	0	0	0	0.38	0	0.39	1.17	0.38	0.36	0.16	0	0.17	0.47	0.97	0	0.26	0.52	0	0	0.84	0.48	1.9	0
W3d19784|c0_g1_i1	4.43	3.5	4.66	2.44	1.75	3.36	9.44	3.47	2.99	4.83	6.92	5.39	4.68	6.09	5.21	2.51	5.61	6.43	6.35	6.69	3.95	3.75	6.1	2.59	3.63	5.14	3.1	2.72	2.54	1.85	5.31	4.43	1.57	6.58	6.82	4.02	2.94	7.5	9.46	5.18	4.14	5.64	7.77	5.07	4.4	7.22	4.39	4.11	4.8
W1a23312|c0_g1_i3	0.89	2.31	1.36	2	1.29	1.57	2.57	1.98	2.67	1.51	2.32	3.37	2.99	2.68	0.74	2.4	2.56	1.08	1.59	0.97	3.44	2.03	1.28	3.67	3.18	1.81	3.25	3.94	1.1	1.82	4.5	2.37	3.94	4.36	4.03	2.57	1.21	3.87	5.17	0.9	2.1	2.26	3.09	3.66	0.93	6.9	2.15	1.79	2.13
W3d16717|c1_g3_i1	0	0	0.36	0.08	0.45	0.18	0.09	0.08	1.2	6.73	0.29	1.4	0	0.04	0.04	0.13	0.09	0.1	2.04	0.32	0.19	0.1	5.03	0.33	0.2	0.71	0	0.12	0.1	0	0.41	0.52	0	0	1.99	0.62	0.12	0.12	2.77	0.03	0.2	2.16	0.45	0.17	0.1	0	0	2.64	0.02
W6b1293|c0_g1_i1	131.22	137.31	121.97	97.11	126.25	122.77	76.17	202.13	273.82	152.6	103.41	174.64	101.87	202.22	128.05	126.89	110.52	216.16	201.89	87.89	141.33	123.59	144.16	97.09	133.31	137.24	128.52	109.47	223.22	104.24	141.3	139.95	264.38	109.16	102.47	93.97	140.9	181.88	203.24	317.23	192.56	122.37	203.29	330.06	82.17	109.84	136.53	172.26	125.93
W1a26055|c0_g1_i2	0	0	0	0	0	0	1.31	0	0	1.08	0	0.88	0	0	0	0	0.56	9.56	0	0	0	0	0	0	0	0	0	0.95	0.14	0.96	0	0.64	0	0	0.27	0	0	0	0.58	40.72	0	0	0	0	0	0	0	0	0.47
Contig18799	0	0	0.17	0	0	0.03	0	0	9.55	0	20.19	4.96	0.25	0.41	0	0	0.06	0.06	0.49	0	0	0	0	0.2	8.14	24.47	0	0	0	0	0	1.79	0.05	6.7	0	0	0	0	24.74	0	0	0	13.62	0	0	0	0	0.19	0.02
Contig42472	5.17	3.62	4.52	5.37	7.9	5.32	12.66	15.85	8.81	11.56	21.92	13.82	10.04	10.89	3.73	5.25	6.53	9.53	5.13	7.27	8.54	5.13	12.34	14.12	8.73	10.4	12.27	8.21	6.45	6.09	7.66	8.33	3.23	6.57	16.96	16.73	9.73	16.45	4.19	13.59	13.54	12.3	13.79	7.39	16.76	5.61	8.12	10.63	12.11
W4a29430|c0_g2_i2	4.99	0.8	2	1.15	0.51	1.89	0.17	3.69	2.06	9.4	1.48	4.59	0.84	2.82	1.04	6.22	11.95	0.09	8.18	10.6	0.34	4.11	0.33	1.95	7.09	0.39	2.09	2.82	0.8	4.67	0.55	3.52	3.58	4	3.55	4.16	2.98	2	10.51	0.8	6.13	4.78	0.11	1.1	0.17	0.75	0.96	0.44	1.93
W5c25494|c0_g1_i1	0	0	0.21	0.1	0.21	0.1	0.6	0.89	0	0.21	0.75	0.43	0.28	0.21	0	0.23	0	0	0.29	0.69	0.59	0.13	0.82	0.7	0.43	0.46	0	0.2	0.18	0	0.26	0.29	1.79	0.12	0.58	0.7	0.32	0.32	0.45	0.27	0	0.51	0.5	0.29	0	0	1.24	0.24	0.2
W1a4490|c0_g1_i3	7.24	0	0	0.41	0.05	1.54	1.18	0.19	0.23	2.04	0.43	1.73	1.28	2.31	0.68	0.06	0	0	0.86	0.88	6.79	0.13	0.75	2.62	1.7	2.34	0.06	0.7	1.44	0.18	1.3	1.27	0.28	2.23	1.65	0.98	0	3.82	0.22	1.26	0	1.82	0.81	0.85	1.96	0.35	0.76	1.81	1.76
W6b28605|c0_g1_i1	0.52	0.17	0	0.15	0.6	0.29	0.77	0.42	0.72	0.57	0.45	0.52	0.33	0.58	0.58	0.08	0.43	0.31	0.21	1.09	0.53	0.57	0.29	0	0.28	0.24	0.58	0.36	0.35	0.66	0.57	0.42	0.34	0.66	0.58	0.43	0.11	0.19	1.07	3.36	0.28	0.42	0.77	0.1	0.85	0.51	0.5	0.35	1.71
Contig35440	0.16	0.08	0.33	0.2	0.2	0.19	0.47	1.28	2.04	0.17	0.81	0.89	0.6	1.73	0.28	0.75	0.39	0.36	0.42	0.8	1.15	0.34	0.23	0.82	0.62	0.18	0.26	0.66	0.4	0.32	0.26	0.56	1.06	0.36	0.72	1.91	0.46	1.04	0.38	3.49	0.42	0.49	1.88	0.19	1.94	0.23	1.75	0.42	1.31
W3d28140|c0_g3_i1	1.68	3.24	2.45	0.87	4.38	2.52	3.35	4.82	5.97	2.98	4.54	3.87	3.64	6.12	3.29	2.73	3.84	1.38	2.24	1.92	1.37	4.05	4.26	2.94	1.57	5.07	4.85	2.55	5.97	3.07	4.98	3.47	2.49	3.77	4.22	3.63	0.89	6.1	4.15	3.95	5.81	1.88	5.54	4.22	1.74	1.75	2.58	4.32	2.22
W7b4393|c0_g1_i1	5.61	0.05	0	0	0	1.13	0	0.73	0.42	4.2	11.66	2.99	1.49	10.08	2.46	7.76	0.09	0.48	0.57	1.13	3.37	0	0	0	1.28	8.81	0	0.44	2.64	0	0.36	2.16	1.68	1.1	0	0.55	2.61	0.37	3.65	3.99	2.08	4.13	4.26	0.34	46.96	1.4	0	5.24	0.9
W4a18478|c0_g3_i2	0.4	0	0.23	0.7	0.58	0.38	2.94	1.54	0.4	2.62	1.4	1.6	1.04	2.51	2.15	1.8	0.53	0	2.44	0.77	1.43	1.62	0.92	0.16	2.71	0.51	0.9	0.23	0.9	0.82	0.29	1.14	2.62	1.64	0.39	0.56	1.07	0.71	0.5	3.75	1.45	3.76	0.74	0.16	1.12	0.2	3.1	0.3	1.33
W6b13652|c0_g1_i2	1.74	0.66	1.14	2.02	2.67	1.65	4.12	1.62	8.8	5.34	10.85	5.24	14.51	11.76	0.16	1.8	1.14	7.89	8.85	4.36	5.81	5.38	5.83	4.5	2.68	5.25	2.39	1.01	1.74	1.21	1.51	4.62	9.59	4.08	5.02	4.88	4.56	2.2	2.5	20.35	6.45	0.96	1.77	0.77	3.48	1.64	6.89	4.34	5.91
Contig36824	0	0.11	0	0	0.1	0.04	0	6.1	22.72	13.92	94.39	23.05	41.49	15.34	0	21.47	0	1.16	11.34	44.03	2.86	0.99	61.68	0.53	2.84	0.53	2.17	1.24	11.04	0	18.95	12.51	0	1.73	1.96	20.8	38.26	0.8	32.73	12.51	36.09	25.4	1.55	1.89	3.75	0	5.5	0.38	7.38
W6b10419|c0_g1_i1	0	0	0	0	0	0	2.08	0	0	0	0.36	0.44	0.13	0	0	0	0	0.36	0.42	0	0	0	0.34	0.41	0	0	0.17	0.15	0.26	0	0	0.12	0.27	0	0.34	0.58	0.69	0	0	2.69	0	0	0.48	0	1.08	0.26	0.45	0	0
Contig35957	0.32	0.1	0.09	0.42	0.09	0.21	1.61	1.23	3.66	0.62	14.05	3.87	0.75	2.63	0.48	1.08	0.64	0.77	0.13	0.8	0.53	0.59	0.26	2.51	0.12	0.71	0.78	1.36	0.4	1.15	0.89	0.87	0.63	13.66	0.21	0.49	2.21	0.95	1.66	191.79	2.85	0.68	0.22	0.45	1.17	0.32	3.1	3.5	36.55
W1a27861|c0_g1_i7	0	0	0	0	0	0	0.55	0.06	0.23	0.49	1.48	0.83	0.67	0.91	0.28	0.38	0	0.73	0	0.18	0.39	0.17	0.23	0.28	0.28	0.37	0.53	1	0.23	0.32	0.69	0.4	0.31	1.21	0.69	0.26	0.42	0.21	0	31.44	0.17	0	0	0.09	0.74	0.12	0.51	1.68	4.93
W4a7500|c2_g3_i3	0	0.3	0.13	0.27	0	0.14	0.16	1.03	0.93	1.4	0.82	0.78	0	0.84	0.7	0	0	0.16	0	0	0.51	0.69	0.15	0.37	1.81	1.04	2.27	0.8	0.58	0.48	0.52	0.57	0.24	1.12	1.37	1.44	0.83	0.56	0.58	1.15	0	1.54	1.3	0.38	0	0	0.2	2.94	0.26
Contig26400	0.42	0.23	0.59	0.53	1.17	0.59	0.95	1.67	3.11	2.14	3.19	1.88	1.29	2.3	0.35	0.78	1.24	2.86	0.9	0.7	0.95	0.49	0.26	1.85	0.76	1.12	2.37	1.63	1.49	2.15	1.45	1.31	5.38	1.78	1.23	1.43	1.33	1.99	2.87	2.49	1.94	1.11	1.89	1.42	0.52	0.79	2.04	0.89	2.54
W4a22070|c0_g1_i1	0	0	0	0	0	0	0	0	4.83	0	14.71	3.26	0	0	0	0	0.53	0	0.16	0	0	0	0	0	6.85	21.71	0	0	0	0	0	1.54	0	5.39	0	0	0	0	16.97	0	0	0	13.27	0	0	0	0	0.3	0
Contig28784	0	0	0.09	0	0.22	0.06	0.75	0.29	1.21	8.15	3.03	2.97	0.33	0.03	0	1.72	0	1.22	0.22	1.44	0.26	0.04	10.65	0.13	0.49	0.27	0.03	6.75	0	0.18	1.74	1.34	2.27	7.27	0.14	3.62	3.48	2.26	4.35	1.45	0.97	0.3	0.05	1.21	0.04	0	5.31	0.55	0.04
W6b8361|c0_g1_i1	0.31	0	0	0	0	0.06	0.78	0	0	0.83	0	0.57	0	0	0	0	0.62	16.65	0	0	0	0	0	0	0	0	0	0	0	0.63	0	0.94	0	0	0	0	0	0	0.38	43.7	0	0	0	0	0	0	0	0	1.03
Contig43706	0.16	0.47	0	0.14	0	0.15	0	0.53	0.32	0.72	0.17	0.66	0.63	0.14	0	0	0	0	0.2	0.37	0.4	0.53	0.16	0.76	0.58	2.91	0	0	0.12	0.33	0.89	0.42	0.25	0.33	0.31	0.94	1.29	0.14	0.6	0.36	0.35	0.23	0.67	0	0.84	0	0.42	0.18	0.8
Contig4812	0	0.17	0.12	0	0.64	0.19	3.25	0.2	4.19	8.56	6.02	4.67	0.54	0	0	3.56	0	0.97	0.21	8.15	0.26	0.08	3.94	2.54	1.82	1.69	0.07	34.49	0.05	0.04	4.54	3.31	2.1	7.87	2	5.48	4.51	3.11	1.73	12.52	6.6	0.98	0.24	2.43	0.51	0	4.59	1.42	0.23
W1a7167|c0_g2_i2	0	0	0.1	0	0.67	0.15	1.47	0.19	1.46	7.02	8.18	3.97	0.91	0.26	0.11	3.79	0.06	0.97	0.43	5.88	0.48	0.13	1.9	2.55	0.94	1.51	0.23	16.56	0	0.06	0.78	1.98	2.49	9.1	1.08	3.58	3.6	2.98	3.28	3.69	2.04	0.91	0.57	2.12	0.12	0	4.62	0.66	0.33
W1a15548|c0_g2_i1	0	0.09	0.23	0.55	0.16	0.2	2.61	0.52	0.89	0.4	0.94	1.23	6.99	0.96	0.16	0.43	0.27	0.65	0	4.44	0.59	4.64	0	0.21	0.26	0.51	0.09	0.15	0.27	0	0.2	1.1	0.14	0	0.87	0.67	0.36	5.36	3.34	0.07	0.29	1.89	2.61	2.27	0.19	1.75	3.59	0.15	0.95
W5c10649|c0_g1_i1	0.37	0	0.64	0.48	0.32	0.36	0.37	1.07	1.1	0.66	3.48	1.18	0.86	0.66	0.66	1.78	0	0.76	1.35	1.91	0.46	0	0.73	0.65	0.8	0.7	0.36	0.63	0.41	0	0.41	0.69	13.61	0.76	0.18	0.15	0	0.33	0.69	1.5	0	0.78	1.02	0	0.39	2.22	1.19	1.71	1.54
W1a11817|c0_g1_i6	0.34	0	0	0	0.41	0.15	0.54	0.33	2.81	0.06	0	1.57	1.31	0.12	0.3	0	0.27	0.07	0.58	1.79	0.22	1.12	0.6	0.16	0	0.77	0	0	0.91	1.52	0.67	0.55	0.05	1.8	0.39	1.52	2.07	1.44	0.25	0	0.59	0.09	0	0.89	0.28	2.53	0.09	1.84	0.47
Contig41393	7.61	5.31	6.15	3.62	5.15	5.57	52.82	28.18	17.59	35.89	50.45	35.52	16.19	18.15	11.77	13	11.04	15.18	15.91	10.33	10.57	11.53	8.37	11.45	21	22.1	15.33	16.52	9.43	15.82	17.99	14.3	18.83	23.45	27.52	20.1	12.5	15.96	18.09	37.27	16.73	28.04	20.51	20.64	21.2	22.97	12.59	20.72	19.18
W0d3755|c0_g3_i6	2.28	0.27	0.57	1.56	4.21	1.78	24.43	15.18	9.19	4.05	3.16	9.7	4.05	3.63	8.55	1.64	1.23	9.28	5.06	15.88	10.32	0.1	6.03	0.44	3.15	0.9	4.94	3.77	5.85	0.97	7.93	4.93	2	3.68	4.13	13.1	3.15	2.7	17.72	8.66	13.66	2.13	1.57	5.34	14.8	4.25	4.02	5.39	9.33
W4a18174|c0_g1_i10	0	0.56	0.2	0.1	0.8	0.33	0.23	1.42	25.05	0.2	0.12	4.52	1.07	0.41	0.31	0	0.57	0	0.14	0.13	0.19	0.51	0.23	0.13	17.04	1.63	1.33	0.29	0.43	0	3.42	1.46	2.07	1.41	0.78	0.19	1.22	1.53	0.85	0.68	0.12	1.45	1.75	1.66	0.36	11.18	0.44	1.03	0.61
Contig31835	0.45	0.84	0.91	0.25	1.14	0.72	5.43	3.42	1.36	2.51	1.98	2.79	0.99	1.77	2.75	0.93	3.71	1.55	1.29	1.87	2.14	0.65	0.44	2.24	0.63	1.85	1.52	1.51	1.07	0.87	1.26	1.53	0.43	3.3	2.22	0.95	2.01	2.88	1.92	3.03	1.62	2.37	4.69	1.88	8.76	3.61	1.1	2.11	2.72
W6b15932|c0_g2_i4	0.15	0.58	0	0	0	0.15	0.3	0.87	0	2.01	43.72	8.24	0.23	0	1.75	0.72	1.2	4.82	0.18	3.98	0.86	0.33	0.15	0.71	18.83	1	2.04	0.26	0.11	0.46	0	1.98	0	1.23	1.02	19.71	0	2.41	0.93	5.44	0.33	0.42	2.29	0.36	3.29	2.93	0.39	0	1.05
W1a5869|c0_g1_i1	0	0	0.13	0	0	0.03	0	5.77	0.29	0.26	0	1.57	0.23	0	0.52	0	0	2.87	0	0	1.44	0	0	0.51	0	0	0.56	0	0	4.93	0	0.58	0	1.2	0	2.32	0	0.26	1.81	1.29	0.32	0.41	0	0	0.61	0	1.69	0.49	0.68
Contig13510	2.25	1.2	2.02	0.94	2.36	1.75	9.58	3.23	6.11	7.73	5.88	6.11	3.99	3.48	3.28	3.25	3.3	2.77	2.67	2.31	1.67	1.76	5.21	4.66	4.14	3.18	4.06	2.67	2.3	2.85	3.95	3.24	2.54	7.98	3.58	4.43	4.02	5.47	4.73	6.45	3.53	7.03	5.99	6.2	2.85	5.06	4.19	7.41	5.61
W5c23509|c0_g3_i8	0	0.13	0.23	0	0.39	0.15	0.27	2.41	0.7	0.59	0.46	0.75	0.07	0.59	0.2	0.17	0.18	0.46	0.22	0.87	0.22	0.39	1.13	0.47	0.45	0.04	0.3	0.45	0.23	0.68	0.59	0.41	2.22	0.23	0.17	0.22	0.24	0.47	0.44	0.62	1.06	0.44	0.18	0.37	0.42	0.66	0.11	0.85	0.4
W6b7579|c0_g1_i5	0.39	0.16	0.1	0.22	0.46	0.27	0.84	0.6	0.97	0.6	0.53	0.63	0.61	0.42	0.3	0.38	0.33	0.58	0.24	0.67	0.34	0.46	0.33	0.65	0.46	0.34	0.54	0.59	0.64	0.68	0.37	0.47	0.35	0.51	0.43	0.56	0.33	0.2	0.24	2.23	0.76	0.55	0.42	0.64	0.47	0.96	0.68	0.44	0.7
W1a7232|c0_g1_i1	0.36	0.47	0.21	0.1	0.05	0.24	2.97	1.1	2.94	3.29	1.64	3.03	1.6	2.48	0.65	0.81	4.89	1	1.03	2.36	1.19	0.86	1.19	1.84	0.26	1.2	2.16	1.08	2.57	0.8	1.47	1.55	1.75	8.55	2.23	1.97	0.8	1.18	0.52	3.21	1.38	2.63	0.5	2.04	1.26	4.17	2.96	0.95	3.8
Contig21014	5.3	6.71	6.86	4.39	4.55	5.57	10	13.62	19.58	15.68	19.32	17.15	9.04	9.58	5.2	17.26	13.17	29.71	10.06	5.06	17.06	7.21	10.74	10.48	24.65	7.28	13.69	5.06	6.1	9.59	19.15	12.11	11.26	10.77	20.84	16.23	9.32	20.37	14.88	20.57	18.29	12.36	17.51	16.93	7	11.16	3.94	18.54	13.91
Contig4147	20.24	24.19	12.67	9.07	17.49	16.73	56.46	77.1	119.6	94.18	100.91	90.21	52.81	57.28	32.46	44.6	31.81	43.15	45.39	35.72	30.99	34.52	27.05	44.15	49.71	65.94	53.32	26.27	34.36	38.44	62.14	42.64	57.56	83.97	57.5	54.14	67.17	61.38	56.73	61.21	64.68	70.26	73.34	74.49	65.39	46.77	34.11	82.58	71.44
Contig29733	0.08	0	0	0	0.2	0.05	0.23	0.12	6.76	0.95	3.4	2.08	0	0	0	0.73	0.98	1.25	0.55	0	0.12	0.08	0.45	0.35	0.11	0	0.59	0.26	2.76	1.16	1.67	0.58	0.41	0.08	0	1.58	0.2	1.21	0.66	18.66	0.08	0.21	0	0.64	0.47	0.57	0.78	0.55	1.56
Contig41824	1.21	0.69	1.19	0.74	0.87	0.94	2.1	2.6	1.99	4.13	2.4	3.48	3.39	0.87	1.95	1.42	2.06	2.47	1.51	1.25	1.09	1.01	0.35	1.52	1.98	2.26	2.45	2.63	0.88	1.57	2.89	1.77	0.6	4.44	1.52	1.84	1.41	2.44	3.4	3.24	3.3	2.4	5.21	3.97	3.9	1.81	1.75	1.49	3
W0d16913|c0_g1_i1	6.23	5.47	4.56	4.32	3.59	4.83	5.09	7.36	11.01	6.87	6.77	7.12	6.39	7.11	5.2	5.68	5.7	6.32	5.44	5.38	5.73	5.48	3.73	7.41	6.14	5.56	7.2	4.84	4.32	4.73	5.55	5.68	5.71	7.74	5.89	7.5	3.56	7.05	5.35	6.18	7.25	10.11	8.09	10.69	8.2	6.85	6.95	5.73	7.08
Contig41142	1.53	1.29	1.59	1.48	1.59	1.5	3.57	2.37	2.56	2.69	3.01	2.95	2.85	2.9	1.88	1.45	2.38	5.94	1.79	2.21	1.59	1.37	1.44	2.21	2.01	2.84	2.17	1.35	1.24	1.16	2.08	2.15	2.66	2.78	3.24	2.12	1.35	2.91	1.92	4.1	2.09	2.4	2.82	4.01	2.63	2.26	2.71	1.99	2.42
W6b31106|c0_g1_i5	0.23	0.29	0.38	0.22	0.59	0.34	1.03	1.18	1.16	1.46	1.37	1.19	1.46	0.65	0.35	0.73	0.94	0.2	0.86	0.53	0.64	0.51	0.49	0.81	0.68	0.83	0.88	0.53	0.4	1.05	0.8	0.7	0.92	1.27	1.09	1.1	0.61	1.03	0.75	1.25	0.56	0.9	1.06	1.13	0.82	0.88	0.62	0.85	1.02
W5c20325|c0_g1_i1	3.62	15.9	10.31	2.9	7.72	8.09	26.13	24.93	30.95	29.04	78.65	35.57	10.27	11.83	28.49	11.84	5.54	48.15	43.86	8.71	7.73	10.9	5.87	6.19	15.84	39.25	23.92	10.31	10.59	26.04	10.44	17.67	55.55	42.44	46	27.26	9.73	17.64	10.05	12.51	18.64	26.1	14.84	25.56	9.87	25.06	14.01	35.77	18.42
W1a19287|c0_g1_i2	2.58	3.2	3.32	1.96	2.21	2.65	4.62	4.35	5.61	7.62	4.76	6.64	4.16	5.46	3.7	4.07	4.61	8.25	5.16	3	4.62	2.83	2.32	3.26	3.04	5.8	6.35	4.13	3.05	2.09	3.98	4.2	3.83	4.91	5.7	4.72	6.61	4.17	2.5	9.48	3.85	5.03	6.53	5.43	3.77	5.62	3.31	4.96	6.79
W5c79|c4_g1_i5	0.08	2.68	1.87	0.06	0.91	1.12	0.22	1.85	2.9	0.47	1.41	1.31	1.57	1.2	1.54	1.37	1.42	0.54	0.46	0.43	1.9	1.89	0.37	0.44	0.6	2.7	1.16	0.76	1	2.45	0.41	1.17	4.28	1.15	5.45	0.69	0.5	2	0.65	0.55	1.63	2.1	0.52	1.98	0.39	1.35	1.16	2.25	2.59
W7b5102|c0_g2_i3	5.19	4.14	1.92	2.06	3.78	3.42	4.38	4.42	3.96	14.03	3.28	5.5	3.33	3.69	2	4.25	4.61	2.21	3.7	3.23	3.78	3.5	12.59	16.32	1.89	5.73	2.8	2.74	4.03	2.57	12.42	5.02	6.48	10.47	12.65	12.89	4.62	4.27	2.42	4.74	1.96	6.35	7.23	2.74	14.77	3.92	3.8	3.3	5.27
W6b1783|c0_g1_i1	0	0	0	0.17	0.17	0.07	0	0.16	0	0.36	2.72	0.61	0	0.36	0	0.77	1	0.21	0	2.3	0.16	1.1	0	0.23	0.58	0.38	0	0	0.3	0.2	0.44	0.42	0	2.05	0	0	0	0.18	1.74	6.79	0.43	0.28	0	0	0	0	0.26	0.11	1.93
W3d9340|c0_g2_i1	0.17	0	0.3	0	0	0.09	0.17	0.57	1.03	0.31	0	0.41	0	0	0	0.33	0	0	1.27	0	0.57	1.34	0.85	0	1.13	0	0.17	0.15	0.26	0.18	1.34	0.4	1.36	0	1.52	0.29	0.46	0.46	0.86	0.13	0.38	1.46	0.24	0	0	0	0.45	1.32	0
W6b8612|c0_g1_i2	0.65	0.66	0.23	0.2	0.85	0.52	0.65	0.61	0.47	2.05	1.23	0.86	0.85	0.74	0.24	0.45	0.94	0.15	0.39	1.15	0.58	0.97	0.87	1.66	0.13	1.73	0.26	0.45	0.37	1.14	0.85	0.73	0.37	0.24	0.52	0.81	0.71	1.81	1.35	4.35	1.12	0.33	0.2	0.25	1.41	0.26	0.46	0.65	1.37
W7b18844|c0_g1_i9	0	0	0.15	0	0	0.03	0	0	26.57	2.97	0.18	4.95	0.14	0.63	0.16	0.67	0.7	0	0	0	3.74	3.28	0	1.64	0	4.98	0	4.46	4.3	0.18	0.19	1.32	0.82	0	9.01	2.34	33.57	0	0	0.26	8.18	2.21	1.94	1.05	3.84	0	0	0.59	0.12
W5c8128|c0_g1_i1	0.15	0	0.25	0	0	0.08	0	0.24	0	0	0.3	0.14	0.11	0.39	0.13	0	0	0	0.18	0	0	0	0	0	0.1	0.82	0.7	0	0.11	0	0.16	0.14	1.59	0	0.7	0	0	0	0.54	0	0	0	0	0.17	0.3	0	0	0.04	0.1
Contig4000	0	0	0	0	0	0	5.58	0	0	0	0	1.13	3.66	0	2.44	3.09	0	5.37	0	0	0	0	0	0	0.18	0	0	2.42	0	0	0	0.9	0	5.33	0.84	0	2.31	0	6.76	0	7.8	0	4.28	1.64	5.3	0	2.39	0	0
Contig29536	0.48	1.32	0.69	0.76	0.63	0.78	1.28	1.78	2.06	1.36	0.84	1.53	1.62	2	0.86	1.08	1.6	0.99	0.78	1.56	0.79	2.2	0.55	1.88	1.74	2.35	1.7	2.04	1.55	1.55	1.5	1.49	1.19	2.46	2.1	1.34	2.45	2.42	1.99	5.08	1.39	2.7	1.44	0.77	1.84	0.36	1.03	1.21	2.18
W4a29480|c0_g2_i1	0	0	0	0	0	0	3.42	0	0.16	0	0	0.83	0	0	0	0	0	0	0.4	0	3.07	0	0	1.52	6.12	2.62	0	0.14	0	0.33	0	0.75	0	5.67	0.16	0.68	3.46	0	0	0.12	5.47	0	0	3.52	0.34	0	0	0.09	1.24
W5c29423|c0_g1_i2	0.08	0.15	0.13	0.33	0.2	0.18	0.84	0.25	1.05	1.29	1.83	0.93	0.71	0.41	0.41	0.58	0.68	0.31	0.65	3.58	0.25	0.5	2.01	1.69	0.27	0.65	1.32	0.39	0	0.47	0.84	0.83	4.87	1.63	0.59	2.34	0.3	0.95	0.28	0.5	0.08	2.13	0.84	0.82	0.32	1.59	0.1	2.34	0.43
W2b10652|c1_g1_i3	0.86	0.07	0.53	0.38	0.01	0.37	7.01	0.3	1.69	1.04	1.2	1.9	0.42	0.01	14.6	0.13	0.69	1.04	0.18	0.38	2.61	12.72	0.15	1.65	1.21	0.19	0.11	5.25	0.54	1	3.5	2.44	0	0.28	0.21	15.32	4.34	5.78	6.41	1.64	0.08	1.75	0.53	0.15	0.26	4.11	0.6	0.01	1.3
W6b20188|c0_g1_i2	0.39	0.08	0.04	0.04	3.29	0.77	1.04	0.25	1.2	0.85	3.08	1.19	1.55	1.51	0.23	0.83	1.21	0.81	3.96	4.99	0.07	0.29	0.98	0	1.98	0.86	0.75	1.99	0.23	0.53	1.77	1.29	1.26	3.86	2.19	0	0.46	0.96	0.48	10.88	0.28	0.43	0	0.21	0.14	1.56	2.51	1.53	1.79
W1a18167|c0_g1_i2	1.34	4.84	7.86	5.38	6.11	5.11	6.54	9.66	13.62	7.08	3.84	10.38	12.81	15.78	5.43	5.51	1.47	4.82	17.12	7.75	20.68	5.14	1.18	11.73	16.94	8.67	11.35	19.47	17.63	12.68	7.06	10.69	11.54	8.27	12.5	7.01	15	17.16	11.42	6.05	24.76	17.43	3.87	14.27	4.52	11.59	5.58	14.38	12.32
W4a11892|c0_g1_i1	1.65	0.7	1.04	0.63	1.54	1.11	1.83	2.21	5.07	1.8	3.96	2.76	3.17	2.3	1.86	1.9	1.62	1.59	1.52	1.58	2.51	2.7	1	3.12	15.47	2.74	2.73	3.56	3.38	2.51	4.36	3.14	3.68	2.62	7.01	3.87	4.54	4.68	2.09	1.83	2.84	3.13	3.51	4.32	1.41	2.96	2.54	2.54	1.98
W5c13897|c0_g1_i1	0.12	1.59	0.4	0.1	0	0.44	1.99	1.83	0.35	0.31	2.45	1.22	0.36	0.42	0.52	13.61	0.47	1.93	0.85	0	0.67	0.26	0.11	0.14	1.61	2.11	0	0.79	1.13	23.45	7.75	2.96	21.72	0.24	0.34	6.64	0	0.31	1.02	0	2.41	0	0	9.29	0.49	0	0	0.89	14.31
W6b638|c0_g1_i3	0.63	1.33	0.73	0.09	1.01	0.76	1.27	0.39	4.65	0.94	1.05	1.42	0.9	1.18	0.75	0.91	2	0.44	2.18	0.91	0.99	1.16	0.83	1.11	1.11	1.1	0.97	0.8	1.1	1.99	2.96	1.23	0.45	1.19	0.77	1.49	2.03	3.33	1.31	2.68	2.34	0.67	0.44	0.89	0.77	3.55	0.41	1.32	1.07
W3d22999|c0_g1_i1	1.42	2.54	1.74	1.05	5.82	2.51	5.46	3.66	3	25.38	9.92	8.33	24.03	17.85	4.52	4.27	3.83	4.17	4.42	6.5	2.15	3.78	42.78	26.51	13.88	3.45	3.12	2.91	27.51	7.43	2	10.8	5.69	20.69	5.69	3.88	14.24	10.97	3.51	12.07	9.87	17.02	5.86	5.83	2.53	7.86	2.86	5.39	4.02
W7b16121|c0_g1_i6	0.06	0	0	0.15	1.33	0.31	4.82	1.84	0	0.52	0	1.2	2.47	14.42	0.11	0.11	0	13.04	0.5	0	0	0	0.23	0	0.34	0	4.54	0	0	0	3.63	2.07	0.28	0	0.4	0.54	0.16	15.9	8.67	0	9.89	0	0.57	0	5.21	7.3	2.88	0	6.01
Contig4428	1.82	0	0	0.36	0.2	0.48	2.11	0.68	2.03	2.3	1.59	1.47	0.23	34.26	0.16	0.84	0	0.12	1.92	0.47	0.29	0.06	0.57	1.51	0.55	32.68	0.17	0.6	68.74	0.24	2	7.65	3.53	0.24	0.51	5.72	2.5	3.03	29.94	3.76	0.06	0.33	0.81	11.62	38.43	0.09	0.75	4.85	0.08
W6b1320|c0_g1_i1	0	0.25	0.33	0	0	0.12	0.65	0.21	0.9	0.46	0.14	0.39	0.6	0.12	0.81	2.61	0.65	0	0.16	1.19	0	0.57	0.38	0.45	0.56	0.12	0	0	0.29	0.53	0	0.48	0	0.26	0.13	0.86	0.69	0.23	0.8	1.34	2.67	0.54	0	1.09	0.27	0.19	0.33	0.25	1.33
W6b10118|c2_g2_i1	1.17	0.85	1.01	0.76	0.13	0.78	0.44	1.44	2.46	0.52	2.75	1.55	1.82	1.96	1.05	2.11	2.04	0.6	1.78	1.51	1.44	1.93	2.01	0.86	2.43	2.77	1.13	1.24	1.09	1.19	1.93	1.63	1.6	1.05	1.56	1.22	1.36	1.56	2.54	33.1	0.95	1.85	0.81	1.76	1.68	1.75	1.69	1.27	1.7
W7b20250|c0_g1_i1	0	0	0.09	0	0.18	0.05	0	0	1	0.18	1.37	0.51	0	0	0	0	0	0	0.25	3.48	0	0.44	2.87	4.85	0.66	0.96	0	7.71	0	0	0.33	1.13	0.16	8.17	0.69	10.53	0	0	2.63	0	0	0	0.56	1.58	5.48	0	0.26	0.48	0
W6b9467|c0_g1_i1	0.64	0.31	0.14	0	0	0.22	0.32	0.26	13.22	0.42	0.83	2.51	1.6	0.14	0	0.61	2.54	0	0	1.28	0.52	5.06	0	2.42	0.46	5.87	0	7.41	1.77	5.03	2.63	1.97	1.99	0	0	0.79	0.21	6.78	0	16.75	7.41	0.22	0	4.96	0.33	1.66	0	0.31	1.21
W5c3404|c0_g1_i1	7.66	12.31	9.61	4.91	6.99	8.3	23.84	12.19	23.94	14.32	5.72	15.22	12.15	23.95	10.29	13.7	14.39	6.83	22.53	10.27	17.87	22.31	12.72	14.64	13.09	26	16.38	19.21	19.91	25.98	17.87	16.85	48.84	33.88	26.33	24.47	16.92	22.47	11.71	8.57	12.33	21.48	12.9	12.54	6.9	10.9	6.44	16.39	13.97
W6b5362|c0_g1_i2	0.19	0.08	0.17	0.13	0.27	0.17	0.35	0.8	0.35	0.21	0.24	0.39	0.54	0.69	0.91	0.45	0.31	0.24	0.95	1.03	0.29	0.17	1.14	0.14	0.14	0.22	0.26	3.07	0.2	0.36	0.13	0.59	0.64	1.2	0.3	0.32	0.57	0.17	0.43	14.76	0.46	0.16	0.48	0.51	0.16	0.17	1.4	0.73	1.15
W4a14784|c4_g1_i4	4.94	0.26	9.51	10.62	11.27	7.32	5.06	8.44	8.71	6.41	7.38	8.54	8.18	16.88	6.67	5.12	5.72	5.22	24.94	4.29	12.23	29.58	4.18	11.7	32.66	26.52	18.02	4.41	10.21	9.11	8.22	12.83	37.93	23.05	39.56	13.11	17.89	27.85	13.54	3.34	14.02	10.85	2.94	8.48	12.08	19.54	10.29	4.41	4.51
W1a12734|c0_g2_i1	0	0	0.61	4.57	0	1.04	0	2.93	0	0	22.96	4.84	14.64	17.57	0	0.27	0	0.15	0	0.16	12.98	0	0	3.01	0.31	0	46.6	45.74	0.74	5.1	1.26	7.82	0	0	46.81	27.73	40.24	1.65	0.35	0.74	24.15	1.6	2.56	0	2.68	2.99	0	1.12	71.66
W4a12658|c0_g1_i1	0	0	0	0	0	0	0	0	0	0	0.29	0.76	0.22	0	0.12	0	0	0	0.17	0.8	0.23	0	0	0.98	35.44	0	8.72	0.35	0	0	0	2.47	0	0.85	0	0	11.26	0	0	0.31	0.15	0	10.16	0	1.01	0	0	0	0.09
W5c6267|c0_g1_i1	3.63	4.04	4.07	4.02	4.78	4.11	5.94	4.35	5.98	4.63	5.04	5.04	5.19	4.06	3.57	4.28	4.91	3.16	7.9	4.91	4.03	8.98	4.37	7.61	6.38	6.6	7.98	5.43	4	5.21	6.03	5.5	6.24	4.47	7.38	6.42	6.29	8.26	5.06	8.21	7.35	4.56	7.43	5.91	6.58	5.42	3.34	4.95	6.07
Contig38041	0	0	0	0	0.07	0.01	1.1	0	0	0.28	0	0.23	0	0.28	1.47	0	0	0	0	0.9	0	0.77	1.53	0.09	0.57	0.22	0	0.13	0.17	0.16	0.34	0.35	0	0	1.14	0	0.21	0.14	0.78	2.71	0.17	0.55	0	0	0.81	0	0.4	0.39	0.03
W6b6496|c0_g1_i1	0	0.69	0	0	0	0.14	0	0.47	0	1.77	3.11	0.89	2.09	5.57	0	2.04	0	0	0	2.12	2.56	0	1.39	1.66	0.62	3.36	0	0	1.27	0	5.47	1.48	0	0.87	0	2.84	2.83	5.05	0	3.66	0.62	5.38	0	0	0.44	1.91	0	0.08	0
W6b2114|c0_g1_i1	0.59	0.76	0.34	1.37	0	0.61	0.2	8.6	0	1.05	0.62	1.74	0.31	0	0.53	18.75	1.38	0	0	1.13	0	2.17	1.74	1.39	0.71	1.5	0.19	0.84	1.47	0.2	2.39	1.83	0.15	1.41	1.15	0.49	0.26	0	0.73	27.2	0.64	3.6	1.36	0.47	1.23	0	2.28	2.05	0.65
W4a9167|c0_g4_i4	1.6	0.83	0.21	0.53	0.54	0.74	0.25	2.83	1.22	1.53	0.77	1.21	1.24	1.32	1.87	2.24	0.74	0.38	1.05	1.7	1.71	0.95	0.96	0.86	1.51	1.98	1.9	1.04	0.82	2.14	0.81	1.33	1.93	3.15	0.84	1.54	1.96	1.09	1.22	0.73	2.54	1.73	0.68	1.18	0.51	1.66	0.79	2.14	0.49
Contig30324	0	0	0	0.32	0.3	0.12	0	0	0.17	0.23	0.18	0.95	0	5.71	0	0	0.03	0.09	3.5	1.1	0	0	0	10.38	1.31	0	4.25	0	0	0	2.49	1.52	0	1.16	0	0	0	1.91	0.03	27.73	1.56	0	0	0	1	1.27	0.47	1.02	0.29
W1a27386|c1_g2_i3	1.24	0.11	0.41	0.61	0.1	0.49	0.59	1.5	4.32	0.1	2.22	3.13	44.35	1.1	0.63	0.4	3.35	3.46	0.5	25.17	0.82	3.24	0.17	3.86	2.9	4.13	5.18	6.09	16.87	2.89	4.87	6.84	0.14	5.43	11.77	9.67	8.46	9.38	4.09	6.3	4.73	1.24	0.81	0.64	2.95	0.79	2.88	0.64	10.96
Contig31699	2.46	0	0	0.17	2.14	0.96	0.98	0.32	1.36	0.35	1.34	2.98	3.74	16.58	1.06	0	4.42	0	2.39	0	7.82	0	0	7.49	3.13	2.8	5.7	4.5	0	3.31	18.42	4.28	3.77	0.6	1.15	0.9	0.78	2.89	25.47	6.16	14.51	0	7.06	0.24	22.95	0	0.25	4.06	1.76
W5c17801|c1_g1_i1	0	0	0.08	0.06	0.03	0.03	0	0.79	0	1.2	0	0.33	0.03	0.29	0.12	0.28	0	0	0	4.92	0.74	0.11	0.16	0.94	1.12	0.49	0.31	0	0.29	1.84	0.14	0.62	3.98	0	0.47	4.69	0	0.46	0	1.33	0.07	0	0.18	0	0.03	80.04	0.04	0.96	0.76
W4a31948|c0_g1_i1	0	0.19	0	0	0	0.04	0	0.32	0.76	0	0	0.18	0	0.34	0	0.37	0.38	0.2	0	0	0.31	0	0	0	1.95	0.36	1.48	0	0	0	0	0.28	0.3	0	0	0	0.77	0	0.48	0.28	1.04	0.27	0.53	0	0.4	0	0	0	0.06
W6b16820|c1_g1_i1	3.39	4.26	2.79	1.29	1.3	2.61	4.54	6.4	16.03	5.37	5.45	6.84	12.37	11.84	7.75	4.16	8.38	9.99	8.31	12.6	3.11	6.1	8.23	9.2	11.21	4.94	6.93	9.41	7.5	8.57	4.48	8.16	16.1	6.24	13.93	17.78	7.38	18.49	10.66	19.82	9.4	11.31	17.39	6.83	7.55	9.02	21.09	9.42	5.41
W4a31517|c0_g1_i3	0.72	0.69	0.25	0	0.13	0.36	0	2	12.07	1.4	0.3	2.68	5.01	4.22	0.64	0	0.29	0.89	2.09	1.15	1.29	3.62	2.39	1.85	21.36	5.57	1.25	2.55	3.52	2.93	6.95	3.56	8.97	4.84	1.11	11.95	4.19	1.15	0.53	6.55	3.42	5.23	6.53	8.09	6.12	1.5	0.92	2.49	0.33
W5c8691|c0_g1_i1	0.87	0.46	0.15	0.49	0.34	0.46	0.31	0.89	1.17	1.03	1.21	0.86	1.33	0.84	1.55	0.62	0.92	0.79	0.96	1.49	1.02	0.91	1.02	0.81	0.98	1.62	1.71	1.62	0.82	0.44	1.23	1.09	5.15	0.83	1.51	1.23	1.02	1.4	1.34	0.93	1.39	0.63	0.65	0.68	0.92	1.38	1.87	1.46	1.85
Contig32419	0.23	1.22	0	0	0	0.29	0.92	0.19	0	1.54	5.16	1.3	2.95	0	1.85	6.4	2.41	4.86	0.14	0.13	0.09	1.89	0	0	0.33	3.16	0.33	0	1.28	6.45	2.66	1.84	0.09	0.71	4.91	0.29	5.2	0.2	0.71	3.81	9.97	1.94	3.01	0.41	1.68	0.52	7.25	0.06	0.23
W4a29850|c0_g1_i1	3.39	3.91	1.12	1.58	2.5	2.5	9.39	4.07	2.71	5.81	3.95	4.71	7.5	7.56	5.83	5.26	7.67	7.53	4.44	5.09	4.91	5.59	3.96	3.97	7.73	6.3	8.31	5.86	3.88	6.52	5.46	5.97	4.59	8.01	9.49	6.96	5.72	9.74	8.4	9.13	8.77	7.32	12.42	7.83	10.87	6.44	9.56	6	9.47
W4a29964|c0_g1_i3	0.61	0.12	0.63	0.63	0.21	0.44	4.88	0.8	0.36	0.11	0.64	1.22	0.66	0.65	0.22	2.11	1.22	1.01	0.89	1.4	0.6	0.4	0.12	0.14	7.85	1.73	2.24	1.65	1.09	1.74	0.13	1.36	0.38	3.25	1.3	1.32	0.81	1.08	0.45	0.45	1.59	1.88	1.18	0.59	0.38	1.46	0.47	0.24	2.47
W5c12030|c0_g1_i6	0	0	0	0	0	0	0.18	0.3	0	0.49	0.19	0.23	0.28	1.95	0	0.35	1.27	0.38	0	0	0.9	0.2	0.36	0.43	0	0	0	0	0	0.56	0.2	0.36	2.42	0.19	0	0.15	0	0	0.68	1.07	0	0.26	0	0.22	0	0	0.7	0.31	0.91
W4a5966|c0_g1_i4	0	0.25	0	0	0	0.05	0	0.54	0.26	0.12	0.14	0.17	0.2	0.12	0	0	0	0.27	0.16	0.15	0.21	0	0	0.31	1.51	0	0.76	0.33	0.39	0.27	0.29	0.26	0.41	0.27	0.51	0.33	0.17	0.12	0.16	0.19	0.28	0.18	0	0.31	0.27	0.39	0	0.11	0.04
W4a6055|c0_g1_i2	0.71	0	0.61	0.25	0.37	0.39	0	1.53	8.34	0.51	2.09	2.18	0.89	1.53	1.4	1.23	0	0.15	2.6	0	1.87	4.24	1.4	2.67	23.84	1.49	2.07	3.15	3.19	1.6	5.66	3.1	1	4.68	3.46	2.02	1.33	3.81	0.88	2.1	0.77	4.61	4.14	0.86	3.12	1.92	2.2	0.2	0.76
W1a2779|c0_g1_i1	1.35	2.09	1.97	0.47	1.59	1.49	3.58	2.66	1.2	2.77	0.92	2.86	1.42	2.05	1.27	2.98	2.9	0.98	3.61	2.09	2.71	4.23	1.19	4.03	2.39	3.84	5.93	3.2	1.96	3.1	2.38	2.75	4.38	2.35	3.6	4.67	3.5	1.98	1.92	1.89	2.49	3.03	3.54	2.19	2.88	3.64	2.26	2.99	3.09
W3d11246|c0_g1_i2	0.64	0.97	0.97	0.5	0.78	0.77	1.91	1.15	0.9	1.73	1.2	1.32	1.24	0.99	0.78	1.31	1.95	1.09	1.75	1.07	1.09	1.24	3.86	1.6	1.22	1.63	1.31	1.18	1.11	1.32	1.47	1.43	1.61	1.2	1.78	1.9	1.13	1.49	1.33	1.05	1.29	1.63	1.4	1.51	0.82	1.48	1.65	0.85	1.74
Contig34627	0.09	0.25	0	0	0.23	0.11	0.88	1.3	1.99	1.09	2.56	1.91	2.58	6.17	10.65	1.18	0.79	1.35	1.06	5.33	0.29	2.02	11.41	0.62	0.7	0.75	0	12.62	0.91	1.16	4.15	3.35	8.63	1.16	1.87	1.82	4.66	1.17	0.43	22.72	4.18	1.23	0.73	0.32	3.01	0.92	1.69	0.34	10.89
W4a5123|c0_g3_i1	3.24	4.92	3.58	1.6	3.76	3.42	4.31	5.95	4.12	7.41	6.92	5.3	5.63	7.56	8.4	5.77	7.69	8.74	8.24	7.08	4.8	6.6	4.98	3.97	6.35	3.36	5.8	1.83	5.39	2.36	5.77	5.81	4.58	7.25	6.28	7.96	3.07	7.4	7.45	8.18	2.84	7.35	5.74	12.03	4.66	8.07	5.15	4.71	4.5
W6b16746|c0_g1_i4	0.71	0.96	0.15	0.37	0.49	0.54	1.03	1.05	0.81	1.51	0.74	1.06	1.57	2.08	0.98	0.78	2.12	0.8	1.85	1.1	1.16	1.01	0.73	1.41	1.41	1.17	1.27	0.81	1.03	0.76	0.86	1.21	1.22	1.99	1.31	2.45	0.94	1.42	1.05	3.19	0.77	0.7	0.78	0.94	1.14	1.48	1.23	0.77	1.89
W2b10652|c1_g1_i2	0.69	0.02	0.3	0.66	0.02	0.34	5.67	0.14	1.25	1.5	0.83	1.61	0.64	0	9.06	0	0.68	1.58	0.07	0.7	2.24	17.4	0.15	2.88	2.35	0.19	0.04	5.81	0.73	0.61	4.87	2.63	0	0.19	0.3	5.59	5.9	6.37	7.25	2.05	0.01	1.56	0.67	0.1	0.39	4.26	0.49	0.01	1.65
W4a7500|c2_g1_i2	0.24	0	0.21	0.21	0.32	0.2	0	0.5	0.24	0.98	1.66	0.76	0.28	6.53	0	0.12	0	1.89	5.48	0.28	0	0	0.24	0	3.97	0.81	0.24	1.76	0	3.73	0.67	1.37	0	2	0	0.3	0.32	0.87	2.42	0.18	0.93	2.74	0.84	0.15	0.13	1.1	0	3.63	1.01
W6b23767|c0_g1_i1	0.79	0.19	0.51	0.85	0.34	0.53	0.39	0.65	0	0.87	1.64	1.01	2.13	1.05	0.7	1.13	0.78	1.21	0.95	1.35	2.25	0.43	0.77	2.3	0	0.56	0.76	1	1.17	0.4	0.43	1.02	0.77	0.6	0.38	0.98	0.52	1.4	1.46	1.45	0.64	1.65	1.08	0	0.41	1.76	0.5	0.66	0.52
Contig31907	0.26	0.04	0.13	0.28	0.13	0.17	0.04	0.66	0.36	1.82	2.06	0.86	1.3	0.59	0.23	2.17	0.18	0.34	4.08	0.25	0.48	0.2	3.22	0.13	0.34	0.28	0.56	1.79	1.66	1.38	1.33	1.08	1.31	0.52	0.21	0.88	0.29	1.33	1.63	7.16	2.26	0.31	0.1	0	1.98	0.87	0.19	0.94	0.51
Contig12726	2.35	0.06	0.33	1.7	0.28	0.94	8.18	4.43	1.26	4.29	3.31	3.93	4.14	11.59	10.71	5.6	1.07	2.94	3.47	5.68	2.96	2.65	3.79	2.15	2.47	4.44	4.96	9.13	5.23	1.62	3.35	4.63	6.54	2.34	1.05	7.29	4.21	24.4	8.24	19.06	8.66	0.62	0.7	2.59	0.79	7.4	8.32	11.95	8.2
W2b19979|c0_g1_i1	0	0	2.26	0	0	0.45	0	6.24	5.06	0	0	1.96	1.93	0.39	2.35	0	3.35	0.3	0	0.17	0.12	0.16	0	7	3.06	7.19	0.14	0	0.43	11.17	2.57	2.12	10.27	0.3	0	0	0	15.7	0.36	1.51	4.43	0	8.46	0	0.46	0.44	2.44	1.06	0.15
W5c9432|c0_g2_i2	0	0	0	0	0	0	0.12	3.25	0.61	0.11	2.32	1.11	0.96	2.09	6.74	0	0	0	0.9	2.55	0	0	1.45	0.29	0.18	2.34	1.55	0	7.63	0.13	4.22	1.63	20.48	1.14	1.08	0.31	0.33	0.33	0	1.37	0.13	0.17	1.71	0.3	1.42	1.66	3.5	1.18	0.57
W0d6593|c0_g1_i1	0	0.43	0	0.51	0.64	0.32	4.85	5.31	3.2	3.66	7.06	4.12	16.09	7.86	1.97	7.19	1.47	7.73	3.75	7.26	6.02	8.56	10.22	2.92	0.11	1.11	6.1	1.49	20.21	1.2	1.94	5.96	5.51	5.11	27.5	4.04	2.54	4.7	17.65	5.52	23.58	1.03	25.14	3.53	4.74	6.37	3.78	3.46	4.34
W2b24479|c0_g3_i2	1.1	3.17	1.88	3.25	2.18	2.32	2.34	4.5	12.69	4.45	3.1	4.76	6.8	6.97	5.59	3.75	6.7	5.16	4.94	3.41	3.2	3.26	7.35	3.11	7.12	4.44	7.39	4.77	4.3	2.39	5.16	5.04	3.91	7.04	9.4	4.69	2.7	4.03	4.07	5.53	12.88	3.51	5.39	5.25	2.6	7.02	3.42	8.37	4.51
Contig5532	0.59	0.25	0.34	0.23	0.29	0.34	0.59	0.43	0.39	0.47	0.55	0.67	1.84	1	0.24	1.45	0.33	0.07	0.8	3.1	1.56	0.14	0.77	0.92	0.86	0.5	0.7	0.45	0.54	0.2	0.73	0.85	0.41	0.47	0.77	0.55	0.79	0.7	0.49	1.65	0.79	0.83	1.09	0	0.62	0.2	0.34	1.02	0.61
W5c8742|c0_g1_i4	1.55	0.64	0.19	1.15	0.9	0.89	2.22	1.46	0.73	2.76	4.4	2.14	4.53	6.65	3.43	0.57	1.62	1.9	2.96	9.59	1.45	0.32	3.55	1.47	1.44	2.03	3	2.32	2.58	2.26	3.01	2.88	7.45	1.06	5.59	1.91	3.44	3.28	4.48	3.97	2.4	1.24	0.82	0.44	1.31	1.99	1.33	4.64	6.57
Contig28126	0.54	0	0.12	0	0	0.13	0	0	11.14	0.24	0.85	2.04	5.37	0	0	3.77	0	0	0	0	1.55	7	0.13	16.65	0	0	0.26	3.44	1.01	0	4.63	2.31	1.38	0.14	0.79	9.82	0.72	0	0.67	0.9	1.62	1.71	3.93	10.73	0.71	0	4.18	8.74	0
W6b697|c0_g1_i9	0.92	1.33	0.49	1.19	0.7	0.93	1.15	2.17	2.95	1.43	2.87	1.9	1.42	1.23	4.71	1.87	2.51	2.01	1.25	1.45	1.6	1.38	1.23	2.55	1.82	4.34	2.54	3.01	1.87	1.75	2.65	2.17	2.33	2.34	2	2.01	2.13	2.14	2.98	3.55	2.61	2.57	3.48	0.55	1.91	0.51	6.04	1.51	6.54
W3d28914|c0_g2_i2	1.4	1.75	2.05	1.11	1.34	1.53	3.28	2.61	1.81	3.09	1.06	2.28	2.68	1.75	2.68	2.89	1.88	2.16	1.89	2.08	1.72	2.95	4.82	3.34	2.19	3.29	3.14	2.15	1.45	2.07	2.52	2.51	1.61	3.52	3.06	5.28	3.19	2.79	2.01	1.53	2.31	4.21	4.49	2.97	2.98	4.42	2.9	1.41	3.23
W7b21133|c0_g1_i2	0.47	0.57	0.61	0.2	0.1	0.39	1.29	1.93	0.58	0.63	0.74	1.05	2.65	3.04	0.74	0.34	0.35	0.61	1.86	0.54	1.25	2.07	1.38	1.24	0.77	2.79	1.14	0.7	0.87	1.2	2.07	1.35	1.56	1.93	1.03	0.69	1.56	3.35	2.91	1.39	1.53	1.82	2.27	1.27	3.55	1.94	1.82	0.86	1.05
W1a13935|c1_g4_i3	0.19	1.22	0	0.08	1.1	0.52	0.39	2.78	0.57	0.77	0.2	1.16	0.75	1.64	0.17	0	0.29	0.9	1.64	0.11	0.63	0.32	0.66	4.07	1.96	0.46	1.87	0.49	1.44	0.3	1.28	1	0.45	1.19	2.16	0.72	1.41	2.41	0.96	0.14	3.25	0.54	2.8	0.35	2.92	0	0.12	1.03	1.28
W5c12657|c0_g1_i3	0.05	0.2	0.59	0.14	0.55	0.31	0.16	0.35	1	1.04	0.66	0.58	0.82	0.14	0.52	0.3	0.48	0.66	0.32	0.43	0.56	0.58	0.36	0.37	0.5	1.55	0.41	0.45	0.2	0.27	0.41	0.49	0.91	1.03	0.67	0.53	0.21	0.71	0.72	0.35	1.26	0.67	0.44	0.57	0.22	0.71	0.14	0.73	1.02
W6b18848|c0_g1_i1	0.61	0.18	0.11	0	0.23	0.23	0	1.23	0	1.07	0	0.38	0.12	0.26	0	0.56	0.19	0	0.78	0.98	0.22	0	0	1.06	0.04	0.13	0	0	0.06	0.25	1.35	0.32	0.02	0.66	0.78	0.02	0.21	0.33	0	2.1	0.2	0.64	0.07	4.55	0	0.48	0.62	0	0.04
W1a14493|c0_g1_i2	4.42	4.08	5.48	4.33	3.85	4.43	3.82	6.45	15.64	3.76	3.79	7.57	5.26	8.31	5.26	5.08	7.14	3.34	9.18	3.38	6.11	4.31	3.94	3.9	5.39	5.67	8.52	3.74	10.36	4.6	7.99	5.87	6.14	9.33	13.32	6.38	6.26	8.72	6.08	11.42	7.13	6.06	4.2	6.48	5.72	3.67	8.08	7.92	5.3
W6b16457|c0_g1_i1	0.76	0.82	1.02	1.32	1.33	1.05	1.52	2.3	14.67	2.04	1.33	3.79	2.56	2.72	0.61	1.71	1.27	0.17	1.85	0.39	2.15	2.23	1.24	1.78	4.1	4.49	3.19	2.37	1.57	1.04	2.33	1.99	2.71	2.6	4.19	2.89	4.5	1.81	1.78	13.16	1.84	2.85	5.72	5.08	2.12	2.15	2.5	2.56	2.75
Contig29762	2.19	0.26	0.12	0	4.17	1.35	0	8.87	0.41	2.55	0	2.24	0.32	2.68	0	0.79	0	0.14	3.32	0	0.22	1.35	2.41	7.36	0.39	0.91	0.53	1.62	4.37	0.28	3.31	1.58	0.43	0.14	3.05	0.11	0.54	0.24	3.72	9.67	4	0.38	3.39	0.33	0.28	0.61	0	3.03	5.62
W6b20990|c0_g1_i1	0.49	0	0.28	0	2.57	0.67	0.65	0.94	0.97	3.64	0	1.04	0.51	1.61	0	0.31	0	3.71	0.8	0.75	0	0	0	0.77	0.47	3.88	0.47	1.53	0	0.33	1.08	0.85	1.66	1.34	0.48	0.14	1.09	0.58	1.42	2.53	0	0.69	1.13	0.79	2.56	0.24	0.21	0.23	2.12
Contig2702	0.54	0	0	0.67	0	0.24	0.46	0.45	1.53	0.69	5.09	1.44	0.6	0.28	0	1.56	0.31	0.8	0.47	0.36	0.25	1.28	0.99	1.45	0	0.59	0.37	0.66	0.35	0.79	0.68	0.62	0.91	6.5	0.3	0.39	0.93	0.62	0.86	127.35	2.01	0.33	0.53	0.09	0	0.46	1.99	1.74	39.98
W4a7415|c1_g1_i2	1.1	0.82	1.08	0.87	1.77	1.13	1.46	2.02	0.8	1.95	1.4	1.46	1.33	1.63	0.83	0.68	0.81	1.08	0.93	0.86	1.05	1.06	1.12	0.88	7.32	1.57	1.98	0.65	0.73	1.23	2.06	1.46	0.79	2.16	2.29	1.61	1.13	2	2.37	1.26	1.88	1.71	2.72	2.79	1.46	1.38	1.87	1.19	1.29
W3d29069|c0_g3_i3	0.42	0.27	0.84	0	0.12	0.33	0	0	0.42	2.61	0.88	0.77	0.76	1	0	0.13	0.14	0.58	1.02	0.32	0	0.77	2.33	0.33	0.4	0.53	0	0	0.83	0.43	0.62	0.54	0.44	2	1.76	1.75	0.37	0.5	0.87	0.62	0.61	0.98	0.96	3.02	0.73	1.88	1.98	0.24	0.6
Contig33537	0	0	0	0	0	0	0	0.12	0	0.27	0.95	0.31	0	0.27	0.14	0	0	0	0.37	0	0.5	0	0	0.18	0	0	0	0.52	0	0	0	0.1	0.24	0.31	0.74	0.25	0	0.27	0	2.46	0.33	0.43	0	0	0.32	0.45	0	0.13	1.51
W4a4675|c0_g1_i4	0	0	0.09	0.6	0.14	0.17	0.43	1.45	3.34	0.05	0.34	0.93	0.08	0	0.81	0.1	0.05	0.44	0.13	0.06	0	0.29	0	0.06	3.25	1.22	2.58	0.45	0.08	0.05	0.12	0.52	0.13	3.17	3.22	1.2	0.14	2.76	0	0	0.46	3.98	0.15	2.44	0.11	0.08	1.38	0.8	0.16
Contig29839	0	0	0	0	1.43	0.29	0.6	0	0	2.26	4.45	2.06	2.09	0	1.34	0.57	0.75	0.08	0	0	1.65	3.86	0.07	2.71	0.16	0	2.31	0.06	0	0	1.89	0.92	0	17.43	13.48	0	1.59	0	1.57	13.76	3.81	1.36	0	8.88	4.12	3.13	0.29	0	0.62
Contig16508	1.62	0.72	0.35	0.23	0.41	0.67	0.67	0.94	3.74	0.84	0.7	1.22	1.62	0.84	2.41	0.97	1.08	0.7	1.39	0.54	1.33	1.18	0.53	0.95	1.22	0.32	0.91	0.46	1.75	1.38	0.82	1.07	1.11	0.76	1.44	2.02	1.88	1.86	1.34	1.34	3.58	1.23	1.21	1.13	1.4	1.21	0.78	2.42	1.25
W4a1268|c0_g1_i1	0.57	0.87	0.14	0	0.14	0.34	0.08	5.82	0	1.23	0.17	1.22	1.26	2.9	0.58	0.08	0	0.17	0.4	0	0.47	1.7	0.16	0.76	3.35	1.39	0.63	0.14	0.91	0	0.9	0.83	0.38	1.58	0.79	0.07	0	0.65	1.91	1.44	0.26	0.57	3.59	3.61	1.1	0.97	0.31	0.87	0.24
Contig33308	1.47	1.29	1.92	0.43	3.28	1.68	1.73	1.53	3.99	1.84	2.02	2.28	1.47	2.2	2.14	1.95	2.39	1.99	3.15	1.53	1.47	2.41	1.86	4.79	4.16	2.49	1.48	2.23	3.17	1.56	2.49	2.36	4.16	3.51	3	2.52	2.74	2.28	2.8	4.59	3.97	1.49	1.47	2.28	1.49	4.83	1.41	2.17	4.65
Contig23457	0.75	0	0	0.9	1.84	0.7	5.4	2.79	0	4.95	0	2.45	2.72	13.06	0.22	0.36	0	12.19	3.12	0.03	0	0	2.23	0.13	4.29	7.02	4.13	3.04	0	0	7.8	3.17	6.48	0.08	2.02	0.8	0.5	25.17	10.5	0	13.62	0	5.98	0.26	6.57	75.8	2.82	0.07	61.5
W4a11344|c2_g2_i11	0.13	0.38	0.22	0	0.57	0.26	0	3.43	0.26	0.7	0	0.73	0.2	0.12	0.12	0.25	0.52	0.13	0.48	0	0	0.29	0.26	0.31	3.77	1.24	0.38	0.22	0.68	1.33	0.57	0.57	0.82	0.13	3.41	0.43	0.69	0.23	0	0.58	0.28	1.46	0.18	0.78	0	0.78	0.34	0.33	0.35
W4a18904|c0_g1_i1	0	0	0	0.14	0	0.03	0.65	0.8	0	0	0	0.24	0.38	0	0.29	0	0	0	0.2	0.37	1.06	0	0.16	0.38	1.05	0	0	0.27	0	0	0	0.22	0	0.17	1.41	0	1.72	0.86	0.2	0	0.35	0	0	0	0	0	2.71	0.27	0.11
Contig7285	3.61	3.77	0.73	2.96	1.66	2.55	4.18	2.97	2.35	3.13	3.27	3.72	4.35	4.49	4.42	1.46	2.46	2.35	1.62	2.07	4.82	1.77	4.09	5.89	4.67	4.68	5.87	4.35	2.97	2.04	3.14	3.55	1.86	5.44	3.04	5.38	3.41	7.43	5.06	4.27	5.05	4.67	6.55	7.98	6.53	2.56	3.91	3.28	3.69
Contig35371	0.5	0.03	1.09	0.03	0.73	0.48	0.43	4.3	3.86	1.57	0	1.79	1.09	4.22	2.8	0.64	0.8	0.55	0.93	0.77	0.9	2.01	0.13	0.35	0.77	2.02	1.61	0.93	0.59	0.99	1.25	1.23	0.5	2.66	2.46	1.5	1.64	2.93	2.23	2.97	3.9	2.48	2.21	4.64	1.11	1.25	1.37	2	1.66
W6b685|c0_g1_i2	1.56	1.78	1.67	0.44	1.98	1.49	2.97	2.35	3.41	3.05	1.94	2.74	1.68	2.93	2.6	1.33	2.64	1.32	3.97	2.36	1.14	2.23	1.86	3.58	2.4	4.05	3.32	2.25	2.73	2.7	2.21	2.49	3.01	2.95	4.71	2.48	3.41	3.36	4.37	9.45	2.85	4.02	2.92	4.08	1.83	2.94	2.86	1.85	2.15
W5c16261|c0_g1_i2	1.14	0.58	1.16	0.81	0.94	0.93	1.07	1.66	2.73	2.45	1.89	1.74	1.46	2.82	0.72	2.39	3.69	1.04	1.71	2.24	0.72	1.18	1.51	1.49	1.51	1.21	0.97	2.45	2.55	2.74	0.96	1.76	3.99	1.99	1.17	0.84	1.7	1.91	2.66	2.62	1.89	3.02	1.39	1.13	1.33	0.9	3.28	0.89	2.41
W7b16121|c0_g1_i5	0.1	0	0	0.09	0	0.04	8.44	0.21	0	0.46	0	1.52	3.26	0.46	0.05	0	0	12.35	1.74	0	0	0	0.1	0.12	1.44	1.65	0	0.13	0	0	0.06	1.12	1.48	0	0.05	0.04	0.48	0.82	3.55	0	13.98	0	1.41	0	4.74	11.41	0.26	0	9.81
W6b10185|c0_g1_i1	0	4.69	4.6	0.72	2.48	2.5	1.84	0.55	6.13	8.05	6.12	3.81	1.82	7.31	4.19	9.16	3.51	1.04	0.2	0.38	3.7	6.62	0.49	2.74	0	5.71	3.23	3.97	5.1	6.32	0.74	3.49	1.05	0.69	2.76	2.93	1.56	1.34	3.32	13.94	10.16	1.17	6.7	2.81	1.92	1.25	2.8	6.34	4.22
W6b4514|c0_g1_i2	0	0	0	0.5	0.36	0.17	1.24	0	0	0.81	0	1	0	3.09	0	0	0	0.51	2.81	0.66	0	0.09	0	5.02	1.85	0	2.23	0	0	0	2.45	0.99	0	0.68	0	1.24	0.22	0.88	0	20.56	1.16	0	0.46	0.2	0.52	0.49	0.42	0.58	0
W5c21255|c0_g1_i1	0	0.26	0.39	0	0	0.13	0.36	9.54	0	2.42	3.88	2.86	21.49	2.34	0.49	2	0.72	10.57	0.11	1.77	0.37	2.09	0.53	6.37	0.66	0.43	1.05	1.15	0.81	0.65	1.8	2.92	7.02	0.46	3.34	3.78	1.45	3.47	49.09	1.67	0.69	0	1.63	16.33	0.19	0.95	1.87	0.69	3.46
W1a7718|c0_g1_i1	0.42	1.22	1.69	0.49	0.12	0.79	1.83	5.09	0	2.13	1.03	2.13	2.73	3.64	1.76	0	2.25	1.31	3.08	0	4.26	3.86	0.28	3.13	1.63	1.47	3.94	0.48	0.1	0.14	2.94	1.95	0.33	1.44	4.64	2.46	1.87	3	1.22	1.14	7.63	0	6.99	0.84	0.15	0	0	0.04	4.53
W4a1268|c0_g1_i2	0.17	0.72	0.14	0	0.14	0.23	0.08	5.9	0.16	1.4	0.52	1.34	1.03	3.83	1.18	0.08	0	0.26	0.4	0	0.27	1.72	0.16	0.48	3.82	1.41	0.72	0.14	0.8	0	1	0.91	0.39	1.44	0.88	0.07	0.44	0.37	2.15	0.79	1.16	0.81	3.76	4.66	2.06	1.11	1.06	1.09	0.38
W1a22758|c1_g1_i3	0	0.14	0.24	0	0	0.08	0.28	4.57	0.14	3.05	2.53	1.96	24.13	1.4	0	0.68	1.28	5.88	0.35	2.13	0.23	0.78	0.28	3.5	0.72	0.54	0.96	1.69	1.17	0.44	0.47	2.45	0.78	0.58	4.84	3.32	1.7	0.89	39.54	1.47	0.31	0	0.79	7.01	0.15	0.64	2.75	0.96	2.5
Contig18549	0.11	0.33	0.65	0.64	0.38	0.42	5.91	1.2	1.56	0.66	2.23	2.2	7.02	5.1	1.52	1.62	1.61	5.02	1.31	2.48	2.02	3.04	0.69	1.55	0.86	0.68	0.62	1.09	0.39	0.87	0.79	2.01	5.15	4.22	1.96	4.35	0.1	6.45	2.65	0.45	2.89	2.02	2.25	2.55	3.55	1.61	3.58	1.19	1.96
W3d6371|c0_g2_i1	0.38	0	0	0.44	0	0.16	0.13	3.2	0.75	0	1.97	1.01	1.76	0.22	0	0	0.25	0.39	0	0.72	7.52	0	9.11	0.29	0.73	0.36	0	0.32	0	0.13	0.42	1.17	0.1	0	0	3.04	1	0	4.2	0.28	2.59	0	0.69	0.45	0	0.75	0	4.23	0.42
W5c29592|c0_g1_i2	4.53	3.32	1.19	1.33	3.5	2.77	4.23	4.56	5.93	5.07	6.93	5.16	4.53	4.23	3.39	3.99	3.71	7.23	5.14	2.1	4.12	2.97	3.29	5.13	9.92	7.47	7.61	3.09	4.56	3.13	6.43	4.84	9.07	8.51	9.41	6.57	5.63	7.01	8.23	2.74	5.86	6.66	6.24	8.15	5.02	4.91	2.53	5.77	5.83
W1a22758|c1_g1_i4	0	0.17	0	0.31	0	0.1	0.53	0.29	0	5.55	6.14	2.37	6.92	0.79	0.32	1.37	3.02	6.07	0.22	3.89	0.44	0.78	0	5.42	0	0.68	0.34	0	1.59	2	0.59	1.81	0.56	0.55	14	7.57	1.18	1.74	10.82	1.84	0.39	0	0.74	0.64	0	0.27	2.75	0.7	7.03
W1a10339|c0_g3_i1	0	0	0	0.31	0.31	0.13	0.36	0.3	2.5	2.25	1.88	2.01	2.1	0	0	1.38	0.54	0.19	1.09	6	1.92	0.59	1.41	0.42	1.82	1.02	5.39	3.66	2.14	0	0.4	1.58	1.27	3.5	2.8	3	3.11	0	9.6	0.27	1.17	1.52	2.24	3.46	4.5	1.62	4.4	3.13	2.21
W5c10082|c0_g2_i1	0.18	0	0.79	0.63	0.64	0.45	0.92	0.15	2.54	0.82	1.53	0.99	1.99	0.82	0.33	0.35	0.37	0.38	0	0	0.9	0.6	0.36	1.5	1.32	3.82	0.18	1.55	0.54	0.37	1.21	0.87	2	0	2.49	0.92	1.22	0.98	0.91	0.4	2.18	0.51	0	1.1	2.1	2.19	0.94	0.67	0.79
W1a26442|c0_g1_i2	0.21	0	0.18	0.09	0.18	0.13	4.19	3.96	0.52	2.71	2.95	3.04	2.77	2.15	0.09	3.22	5.75	2.16	1.65	2.77	0.6	1.04	1.03	5.03	0.3	0.4	12.65	0.89	1.48	1.6	8.88	2.87	2.21	2.57	0.2	23.93	0.97	9.78	3.5	5.17	3.52	4.7	2.6	8.05	1.09	3.45	2.02	1.62	6.12
W1a19322|c0_g1_i1	1.82	0.61	1.32	0.42	2.32	1.3	4.51	5.38	2.63	2.03	0.62	4.62	1.93	4.09	0.22	1.98	0.14	0.29	3.83	0.28	6.8	5.84	0.27	6.23	4.17	9.42	3.92	3.56	1.61	1.29	10.72	3.5	2.22	6.2	7.37	4.52	3.26	4.79	1.99	1.7	9.68	6.34	5.36	16.05	2.88	11.57	0.68	3.25	4.39
W7b9799|c0_g1_i4	0.36	0.43	0	0.38	0.15	0.27	0.18	2.12	0.88	0.87	0.46	0.92	0.55	0.63	0.48	0.43	0.98	0.64	0.43	0.82	0.66	0.78	0.61	0	0.51	0.51	1.12	0.08	0.53	0.73	0.29	0.57	1.6	0.45	0.43	0.37	1.77	0.4	1.32	0.52	0.96	1.5	0.25	0.32	2.87	1.2	1.94	0.9	1.97
W5c11313|c0_g1_i1	0	0.6	0.3	0	1.24	0.43	0	3.21	1.58	0.95	0.74	1.22	0.83	0.79	0.16	0.43	0	0.37	0	0	1.38	0.19	1.04	1.14	0.83	1.09	0.77	0.83	1.32	0.99	5.56	0.93	3.67	6.8	1.2	1.18	0.71	1.65	0.44	0	2.21	1.37	0.12	2.87	0.09	2.25	1.48	1.04	0.15
W1a29524|c0_g1_i1	1	1.55	0.17	0	0	0.55	1.4	1.15	2.18	0.18	1.05	1.1	1.56	0.89	0.36	0.96	0.4	0.21	0.97	0	0.16	1.1	0.2	0.47	0.43	0.38	3.1	1.02	0.74	0.82	1.77	0.82	0.16	0.62	1.17	2.34	0.53	1.07	1.24	3.25	1.3	1.69	1.11	1.2	1.25	3	0.26	1.74	1.53
W5c7082|c0_g1_i5	1.18	2.69	1.88	1.31	2.79	1.97	7.08	5.41	10.11	4.51	3.43	5.33	3.01	3.23	3.39	3.08	5.05	1.83	3.59	1.16	1.59	3.71	3.72	2.76	8.66	5.75	4.23	0.93	2.19	4.91	3.9	3.51	17.93	5.18	4.42	3.58	3.92	6.82	6.89	10.69	4.94	3.19	5.24	8.1	6.41	3.28	1.95	4.8	4.53
W1a17121|c0_g1_i7	0.31	0.28	0.32	0.15	0.3	0.27	0.33	0.51	0.29	0.29	0.2	0.4	0.18	0.26	0.21	0.28	0.48	0.36	0.16	0.31	0.33	0.36	0.32	0.79	0.24	0.35	0.6	0.11	0.33	0.3	0.51	0.34	0.27	0.63	0.51	0.5	0.13	0.62	0.34	0.54	0.23	0.62	0.56	0.93	0.52	0.41	0.35	0.43	0.56
W2b15563|c0_g1_i1	0.42	0.62	0.75	0.07	0.2	0.41	0.75	0.74	0.41	0.67	1.97	0.9	0.44	1.18	2.43	0.76	0.64	1.56	0.69	0.3	0.4	0.25	0.18	0.84	0.3	0.5	0.76	0.35	0.17	0.08	0.58	0.65	0.44	1.7	0.84	1.07	0.4	1.27	0.93	0.56	1.55	1.22	1.04	2.08	0.04	1.47	0.53	1.18	0.86
W6b2532|c0_g1_i1	0	0	0	0	0	0	2.44	10.78	0.88	2.28	51.51	12.82	0.26	0.3	1.29	10.66	9.64	0.23	0.68	0.26	0.18	0	0.22	3.9	0.16	0.21	39.05	0.38	0	2.83	17.01	4.59	0.17	1.48	0.22	34.73	0.89	8.2	9.64	25.31	11.93	14.81	15.64	79.24	0	8.64	10.58	4.74	2.47
W5c25368|c0_g1_i3	1.3	1.51	1.37	1.12	1.62	1.39	3.28	2.48	2.21	2.01	2.05	2.27	1.59	1.9	1.57	1.36	1.55	1.28	1.97	1.59	1.64	1.65	1.19	1.73	2.87	1.99	2.2	1.89	1.64	1.51	2.03	1.74	3.92	2.63	2.55	2.58	2.26	2.14	1.34	1.86	2.16	2.61	3.3	2.23	1.71	3.38	2.13	2.22	2.28
Contig19288	0.48	0.06	1.04	0.36	0.79	0.55	0.48	2.03	1.91	0.59	1.32	1.25	1.59	1.56	0.65	0.12	0.42	0.25	2.49	0.48	0.89	0.2	0.71	0.78	2.74	0.91	4.36	0.51	0.67	0.43	0.86	1.08	4.28	1.36	0.53	0.95	0.48	3	2.31	0.89	1.37	1.1	2.16	3.76	1.82	0.45	2.25	1.99	0.54
W5c23486|c0_g1_i3	0.59	0.49	0.6	0.19	0.58	0.49	1.91	1.65	1.28	1.81	0.71	1.39	0.91	1.34	0.52	1.03	1.89	1.05	0.88	1.5	0.99	0.86	0.44	1.81	0.37	1.28	1.36	1.44	0.71	0.88	1.16	1.07	3.49	1.92	1.74	1.79	1.09	1.48	1.02	1.77	1.65	1.51	2.07	2.65	1.36	1.93	1.71	1.19	2.05
W6b17467|c0_g1_i1	0	0.24	0.11	0.63	0	0.2	0.49	0.4	1.21	1.31	1.15	1.02	1.52	0	0.44	0.23	0.49	3.03	0.45	0.84	0	0.13	0.24	3.15	1.06	0.46	0.47	0	0	1.25	0.27	0.74	0.19	4.25	0.95	0.71	2.11	0.22	3.94	10.99	0.27	0	0	0.29	0.76	0	5.35	1.64	1.91
W5c23486|c0_g1_i1	0.34	0.69	0.49	0.22	0.38	0.43	1.91	1.29	1.4	2.32	0.87	1.4	0.56	0.94	0.51	1.05	1.52	0.9	0.99	1.21	0.94	0.98	0.33	0.86	0.33	1.34	0.94	1.25	0.77	0.81	1.31	0.92	2.96	1.91	1.17	1.74	0.84	1.5	1.28	1.39	1.12	1.62	1.73	1.84	1.2	2.14	1.15	1.15	2.26
W2b31579|c2_g3_i3	1.17	0.77	0.32	0.27	2.09	0.92	1.53	0.61	1.52	2.08	7.11	2.3	0.95	2.41	5.65	1.94	0.8	0.38	0.82	0.92	0.2	0.61	0.72	1.08	1.82	1.16	0.89	2.49	3.33	0.75	1.89	1.52	1.82	1.07	5.41	1.94	0.73	2.07	3.19	0.99	1.66	1.46	0.51	1.55	3.13	1.28	1.81	0.84	2.32
Contig14167	0.29	0.76	1.48	1.43	2.19	1.23	2.22	2.3	3.12	1.53	2.54	2.44	2.84	1.47	1.41	0.21	0.5	2.14	1.13	0.58	2.64	0.31	3.02	1.93	1.5	2.31	2.21	1.4	3.36	2.12	3.71	1.83	3.47	3.08	2.29	4.72	3.14	1.78	1.6	4.54	1.01	3.22	3.46	3.53	6.04	2.79	5.16	10.18	2.3
Contig34663	0	4.34	20.77	0	0	5.02	55.54	0	13.9	0	0	15.48	0.22	0	6.72	0	73.16	41.19	0	30.07	64.59	0	0	0	0.73	0	0	66.81	0	8.41	0	15.36	0	36.86	0	0	0	0	13.8	66.85	64.16	4.47	9.18	19.1	12.96	19.26	15.45	0	19.91
W1a23124|c0_g1_i5	0.83	0.95	1.17	0.98	1.11	1.01	1.87	1.58	2.33	1.24	0.74	2.02	1.17	1.35	1.44	0.95	0.88	1.03	1.99	1.33	1.41	1.44	1.15	2.17	1.49	1.62	1.87	1.31	1.58	1.25	1.61	1.42	1.85	2.88	1.87	2.14	1.45	2.12	1.5	1.39	1.31	2	2.06	2.69	1.3	1.69	1.83	1.99	2.33
W6b7579|c0_g1_i9	0.24	0.48	0.3	0.59	0.35	0.39	0.87	0.99	0.84	0.77	0.79	0.74	0.64	0.36	0.5	0.54	0.75	0.99	0.49	0.35	0.31	1.01	0.32	0.66	0.51	0.82	0.98	0.82	0.66	0.53	0.6	0.62	0.44	1.2	0.8	0.78	0.56	0.48	0.49	2.29	0.38	1.15	0.62	0.68	0.56	0.95	0.82	0.72	1
W6b6026|c0_g2_i1	0.17	0.33	0.29	0	0	0.16	0.68	1.13	2.88	0.76	2.68	1.39	0.67	0.31	0.31	2.79	7.18	0.35	1.04	1.18	0.28	1.51	1.51	1.2	0.25	0.32	0.66	1.74	0.38	1.75	0	1.23	1.07	5.26	3.65	1.28	0.68	1.22	0.85	2.02	0	0.96	1.65	0.82	1.78	0.51	0.22	2.45	3.69
Contig15319	0.69	0.26	0.4	0.13	0.1	0.32	4.76	4.48	0.84	7.76	7.46	4.81	3.28	2.16	1.75	4.72	4.48	3.92	2.43	2.91	1.38	1.35	2.26	4.31	0.86	1.16	17.42	1.2	2.43	2	6.68	3.51	1.29	2.71	1.94	11.55	2.65	9.29	9.75	7.92	10.16	4.79	2.17	8.07	2.12	2.53	2.37	2.59	5.28
W7b16853|c0_g1_i1	3.52	0	0	1.47	0	1	0	5.98	0	113.85	0	19.97	0.94	0	0	0	0	0	10.17	41.24	0	0.13	0	18.6	0	2.87	4.92	7.4	0	0	6.15	4.86	0	0	13.65	18.2	0	0	2.1	0	18.81	0	1.51	0	9.22	1.09	7.33	0	19.23
Contig41206	1.32	1.42	1.01	0.82	2.81	1.48	2.78	2.77	1.6	1.83	3.59	2.64	2.96	2.22	3.34	2.32	1.31	1.51	2.22	1.51	2.64	1.05	1.86	3.69	1.22	2.91	4.95	2.11	3.87	1.57	1.53	2.36	1.43	2.62	2.34	2.93	2.53	3.25	2.27	4.69	1.35	3.8	2.63	2.55	4.88	3.29	2.64	5.91	2.14
Contig18466	1.87	2.51	2.04	1.76	2.38	2.11	6.86	7.01	10.46	5.24	8.24	7.21	6.02	4.47	4.76	3.64	5.48	5.12	4.84	5.28	4.2	2.66	3.36	5.61	10.56	7.23	9.31	4.09	4.39	5.29	8.35	5.51	6.34	9.5	11.87	8.43	4.96	6.15	5.14	8.63	7.43	7.39	12.58	8.97	11.26	8.92	8.28	12.86	10.53
Contig44717	0	0.27	0.06	0.12	0.4	0.17	3.24	2.63	4.08	1.41	0.33	2.35	0.63	0.13	1.1	1.38	1.65	0.73	0.47	2.87	0.86	1.82	0.9	2.43	1.02	0.9	2.17	3.64	1.23	2.69	0.77	1.44	1.1	4.64	1.95	1.23	0.8	0.41	16.48	6.74	2.02	4	0.97	0.76	2.02	2	12.95	2.37	13.92
Contig5788	0.74	1.3	0.95	0.38	0.91	0.86	3.2	2.1	1.71	2.15	1.97	2.36	1.55	2.31	3.9	1.54	2.13	1.31	2.22	1.39	1.27	1.83	0.79	1.72	1.58	3.35	3.09	1.35	1.27	1.44	1.95	1.89	3.85	3.56	2.94	2.43	1.74	2.49	1.92	1.56	2.42	2.74	3.02	4.92	2.35	2.08	1.06	2.42	2.98
W5c15912|c0_g1_i1	0.31	0.1	0	0	0.09	0.1	0	0.82	1.6	0	0	0.5	0.24	0	0	0	0	0.16	0.19	0	0.34	2.35	0.2	0.24	0.6	0.3	0.96	0.44	0	0.16	0.06	0.33	8.38	0.11	0	1	0.07	0.05	0.06	0	0	0	0.79	0.19	0	0	0	1.1	0.1
W5c9073|c0_g1_i1	2.05	3.14	1.76	1.15	3.69	2.36	2.85	4.84	5.57	2.48	1.59	3.8	2.98	4.9	1.77	3.94	3.63	1.77	2.09	2.36	2.98	4.87	2.07	1.86	2.49	3.13	5.81	4.09	2.12	3.58	1.89	3.07	8.38	2.84	3.92	6.4	4.22	2.35	1.56	2.54	3.09	2.79	3.47	3.26	2.83	0.99	1.79	8.02	5.05
Contig40998	0.34	0.33	0.31	0.22	0.76	0.39	1.02	1.47	0.93	1.5	0.69	1.06	0.5	1.27	0.29	0.88	0.91	0.79	1.29	0.78	0.45	0.86	0.42	0.8	0.78	1.17	1.19	0.47	0.63	1.09	0.66	0.8	0.65	1.22	1.26	1.72	0.42	1.4	0.5	0.63	0.95	0.81	2	1.92	4.65	0.76	0.88	0.81	1.41
W6b27212|c0_g1_i1	0.35	1.01	0.15	0.3	1.06	0.57	0.52	0.57	1.2	1.39	0	0.77	2.97	0.31	0.62	0	0	5.19	0.21	0	1.14	0.76	0	1.02	0.13	2.47	1.34	0	0.39	0.35	0.38	0.91	0.54	2.13	1.35	1.3	0	0	0	2.05	0.19	0.73	1.68	10.21	0.72	0.26	2.01	0.34	0.52
W4a27694|c0_g3_i1	2.53	2.64	1.48	1.53	1.47	1.93	2.17	3.07	5.09	6.22	4.4	3.75	3.12	2.9	1.9	2.74	2.4	3.69	2	3.96	2.07	0.84	1.97	3.34	6.73	2.51	3.02	2.79	2.03	4.67	2.79	2.92	2.26	4.64	2.14	3.45	4.27	3.78	1.29	2.78	4.53	3.27	4.43	8.63	1.8	4.02	5.58	2.58	3.18
Contig32587	0.57	0.69	0.29	0.47	0.59	0.52	5	2.47	8.92	4.12	3.32	4.16	0.9	1.8	1.42	1.47	3.71	4.6	1.9	3.29	0.95	0.94	3.81	1.13	1.7	1.4	3.04	3.95	1.82	1.85	2.97	2.25	2.31	9.39	2.92	3.64	0.79	1.34	1.34	27.78	2.4	7.09	2.27	3.55	4.05	2.97	5.41	6.83	4.66
W1a26442|c0_g1_i1	0.21	0	0	0.18	0	0.08	3.52	2.28	0	4.27	1.22	2.41	1.08	1.05	0.57	2.76	0.96	0.66	0.78	0.24	1.22	0.23	1.25	2.37	0.08	0.2	12.56	1.72	0.48	0.11	2	1.6	0.42	0.11	0.93	9.15	0.71	1.52	1.32	2.04	4.74	1.65	1.03	3.58	0.67	1.12	3.84	1.94	2.23
Contig33237	1.53	0.11	0.71	0.61	0.41	0.68	7.42	24.9	11.32	20.78	43.93	20.03	9.43	4.31	2.32	15.83	13.75	29.66	4.87	1.62	1.54	2.72	1.62	11.17	2.47	2.9	33	3.6	2.1	9.26	15.31	8.82	2.86	4.82	2.86	44.1	2.35	29.03	43.65	9.38	20.32	23.48	12.85	62.11	6.14	20.81	20.16	50.17	21.11
Contig38613	0	0.11	0.56	0.19	0.48	0.27	0.44	1.98	23.74	13.65	0.11	8.16	2.55	4.88	0.39	1.16	1.2	3.39	11.7	0.25	0	1.44	0.43	0.26	2.29	3.53	6.66	1.11	10.25	0.89	9.76	3.27	9.16	0.9	1.7	4.74	2.18	0.68	4.75	11.21	0.59	4.45	1.06	1.31	40.82	7.04	5.77	31.25	1.52
W6b7579|c0_g1_i7	0.39	0.69	0.56	0.52	0.51	0.53	0.8	1.1	1.47	0.84	0.72	0.89	0.84	0.79	0.64	0.52	0.86	1.09	0.99	0.42	0.51	0.71	0.42	0.71	0.58	0.96	1.1	0.91	0.53	0.79	0.36	0.72	0.72	0.97	0.98	0.61	0.54	0.46	0.61	2.22	0.49	1	0.92	1.11	0.81	1.19	0.97	0.85	1.38
Contig7562	0.3	0.07	0.13	0.32	0.19	0.2	6.85	2.26	19.61	1.92	5.68	6.34	0.75	1.33	1	0.86	0.45	4.92	0.36	6.67	0.3	2.29	1.75	3.75	1.99	3.46	4.74	1.14	1.27	4.48	2.71	2.33	1.98	4.11	5.13	10.42	3.27	3.18	1.75	9.71	2.58	1.36	3.7	2.5	11.48	7.02	9	6.83	7.26
W2b21232|c0_g1_i4	0.24	0.44	0.25	0.6	0.21	0.35	0.32	0.59	0.16	0.88	0.58	0.5	0.5	0.31	1.5	0.61	0.53	0.27	0.29	0.64	0.41	0.41	0.5	0.22	0.31	0.33	0.33	0.47	0.38	0.44	0.59	0.48	0.25	0.82	0.31	0.82	0.35	0.36	0.53	0.45	0.23	1.57	0.37	0.13	0.19	0.44	0.34	0.73	0.59
W7b234|c0_g1_i4	0.13	0	0	0	0.68	0.16	1.57	0.43	0	0.93	0.96	0.74	0.3	0.58	0.23	0	0	0.54	0.32	0	0.75	0.29	0	1.84	0.66	3.59	0	0.66	2.04	0.8	1.3	0.73	0.1	0	3.8	0.44	0.17	3.02	1.13	0.39	0.28	2.93	0	0	5.04	1.56	1.68	0	0.48
W4a20008|c0_g1_i1	0	0	0.05	0	0	0.01	0	0	0	566.36	0	94.39	400.18	0	32.5	0	0	0	0	0.24	0	0	0	0	230.1	0	0	0	0	0	0	34.9	0.08	0	0	0	31.68	0	365.89	0.08	0	84.02	0	0	3.58	0	0	0	485.18
W4a29932|c0_g1_i4	0.36	1.4	1.09	0	1.74	0.92	1.63	5.51	0.72	2.74	3.22	2.69	2.39	3.23	0	2.09	0.18	1.31	0.44	2.29	1.78	0.2	0.89	1.7	13.22	5.66	2.45	2.15	0.81	2.59	4.19	2.5	2.55	7.23	8.08	1.96	2.89	2.09	0.22	1.34	10.61	0.51	1	5.87	4.72	1.9	0.47	4.27	1.62
Contig43927	0.49	0.73	0.55	0.45	0.54	0.55	1.24	1.02	1.34	1.25	1.31	1.18	0.68	0.65	1.07	0.67	1.29	1.32	0.75	1.12	0.83	1.26	0.79	1.6	0.85	0.8	1.25	0.76	0.63	1.59	0.87	0.99	0.85	1.32	1	1.58	0.9	1.43	0.72	1.37	0.83	1.89	1.94	1.62	2.15	1.09	1.59	1.53	1.55
W6b24139|c0_g1_i2	4.85	4.14	4.07	2.55	5.25	4.17	6	11.12	12.65	10.1	4.77	9.02	7.25	8	8.38	4.33	7.19	6.75	7.55	3.56	8.32	6.85	3.68	8.42	10.54	11.5	8.23	8.03	6.95	5.64	9.45	7.4	4.87	8.27	7.88	10.67	9.67	6.72	3.83	14.85	8.76	8.37	9.32	10.03	8.48	11.44	9.22	9.99	9.44
Contig11000	1.66	1.22	1.4	1.22	2.58	1.62	2.96	3.29	3.79	4.05	2.86	3.22	2.16	3.44	4.58	2.56	3.85	2.75	2.5	2.36	1.92	2.18	2.26	3.42	2.77	3.42	3.66	2.72	2.41	1.88	2.62	2.81	3.16	3.99	3.5	2.8	1.82	2.53	3.17	1.97	3.17	5.47	3.59	3.94	3.01	2.86	3.06	5.83	4.25
Contig4387	0.25	0.44	0.79	0.58	0.25	0.46	0.08	23.93	4.25	15.39	41.08	16.43	5.01	17.34	4.8	19.94	11.21	1.33	3.9	5.45	1.84	1.51	4.4	8.33	4.57	5.72	18.53	3.07	3.65	3.23	2.61	6.66	6.61	8.9	3.51	6.28	3.27	12.73	16.86	12.46	37.74	5.67	7.99	65.08	2.25	19.43	24.26	10.79	3.87
W5c24806|c0_g1_i2	5.04	4.31	4.16	3.43	6.54	4.7	8.34	11.09	9.74	9.53	13.45	10.04	9.5	11.45	7.77	8.08	7.26	4.87	8.57	7.4	6.31	9.09	8.06	10.26	7.47	7.69	10.01	8.01	8.84	9.64	7.39	8.3	16.27	14.23	8.35	14.55	5.93	10.84	7.51	9.1	8.39	10.53	10.68	11.44	11.83	10.6	12.26	14.39	10.76
Contig42295	0	0	0.11	0	0.04	0.03	0	2.68	0.11	0.08	0.18	0.51	0.61	0	0.06	0.04	0.04	0	2.87	0.05	0.17	0.16	0	0.27	3.8	0	0	0	0	0.26	0	0.44	0	7.14	0	0.07	0.37	0	0	0.47	0.05	0.66	0	0	6.19	0.06	6.13	0	0.04
W4a17943|c0_g2_i2	0.99	1.47	1.88	0.58	1.01	1.19	2.06	1.95	3.5	2.59	0.89	1.9	1.81	0.92	1.6	1.5	2.9	1.71	1.09	0.98	1.06	0.88	0.66	3.09	5.37	2.37	1.81	1.63	1.43	1.14	1.23	1.75	1.26	2.43	2.26	3.09	1.25	1.91	0.78	1.68	2.18	2.01	1.73	3.38	2	1.87	2.07	1.89	3.74
Contig29877	0.65	0.73	0	0.19	0.37	0.39	10.1	58.86	14.16	17.04	102.04	36.94	31.48	8.24	6.53	51.69	89.65	45.46	19.85	8.52	3.7	1.65	11.69	61.91	16.24	2.65	172.41	12.57	7.67	70.43	37.65	34.74	3.87	13.75	1.25	140.39	4.14	210.96	95.88	79.07	117.38	119.17	33.08	283.15	32.36	95.86	262.35	170.39	81.58
W7b7371|c0_g1_i2	0.65	0.54	1.11	0.49	0.63	0.68	0.8	0.97	0.69	2.28	1.52	1.18	0.75	0.65	0.64	1.39	1.77	0.99	1.03	0.67	0.95	1.43	0.51	1.41	0.68	1.38	1.2	0.94	0.73	0.85	1.36	1.02	1.24	1.07	1.76	1.28	1.34	1.35	0.81	1.02	0.65	1.01	1.64	0.98	5.74	1.37	1.07	1.88	1.58
W7b7371|c0_g1_i1	0.72	0.65	0.73	0.3	0.58	0.6	1.09	1.16	0.71	2.48	1.35	1.25	0.77	0.64	0.76	1.61	1.54	0.95	0.96	0.79	1.14	1.09	0.71	2.02	0.62	1.32	1.16	0.92	0.83	0.85	1.13	1.04	1.02	1.32	1.87	1.34	0.85	1.47	1	1.58	1.02	1.03	1.76	1.33	6.04	1.75	1.34	1.2	1.97
Contig43925	0.6	0.75	0.63	0.4	0.64	0.6	1.21	1.1	1.69	1.06	0.89	1.18	0.96	0.76	1.39	0.69	1.41	0.88	0.7	1.67	1.06	0.77	0.7	1.98	0.76	1	1.15	0.83	0.93	1.06	0.99	1.04	0.64	1.04	1.45	1.29	1.19	2.03	0.64	1.06	1.21	1.59	1.59	1.77	2.88	1.22	1.02	1.08	1.5
W7b10846|c0_g1_i3	0.3	0.44	0.28	0.13	0.68	0.37	0.78	0.91	0.81	1.1	0.59	0.82	0.34	1.14	0.56	1.12	0.8	0.96	0.71	0.37	0.74	0.88	0.4	0.68	0.73	0.74	0.67	0.48	0.61	0.84	0.55	0.7	0.63	0.95	1.26	1.26	0.32	0.94	0.4	0.81	0.77	1.06	1.46	0.96	3.15	0.81	0.58	0.88	1.27
W4a6109|c0_g2_i1	3.62	3.84	0.93	2.03	1.26	2.34	9.75	30.44	8.05	22.04	30.18	21.52	12.91	6.6	6.3	14.39	13.33	19.01	7.68	18.88	6.96	12.7	7.25	12.05	17.89	7.19	26.16	9.18	20.15	21.38	3.18	12.8	20.9	22	9.46	19.87	8.64	17.67	13.2	18.24	33.1	14.96	19.69	37.73	33.11	31.62	81.8	56.63	114.98
Contig33544	0.53	0.34	0.52	0.37	0.98	0.55	6.21	1.86	2.52	5.03	4.57	3.68	3.56	2.74	3.91	3.79	7.53	4.66	4.59	4.86	0.69	0.85	3.39	3.59	4.11	1.94	2.79	3.38	3.96	1.91	1.28	3.34	3.75	5.42	4.14	4.5	3.47	1.51	2.4	5.15	3.86	3.81	2.39	4.15	5.77	4.65	4.58	5.07	9.69
W1a3646|c0_g1_i3	2.32	2.06	1.35	1.36	2.08	1.83	2.95	2.84	2.48	3.8	2.03	3.38	2.92	3.69	2.07	5.36	3.57	1.68	1.75	2.74	3.6	2.69	1.84	3.08	2.81	4.87	2.73	3.3	3.03	3.01	2.42	3.01	2.01	2.31	3.22	6.12	3.42	2.73	1.86	1.39	3.54	5.63	3.64	2.18	2.35	5.35	4.92	3.01	2.48
W5c6200|c0_g1_i2	4.91	5.59	6.02	2.06	5.6	4.84	8.53	9.24	9.29	9.7	7.52	8.2	6.84	7.8	5.62	6.32	7.67	6.6	7.56	6.39	5.02	6.71	7.87	10.41	8.03	5.98	7.62	8.04	5.85	9.61	9.09	7.32	12.28	7.7	9.19	9.08	6.84	7.83	5.63	7.37	7.83	7.2	7.48	14.84	9.47	7.86	8.26	9.44	12.77
Contig7293	0	0.08	0	0.14	0	0.05	0	0	0	0	0	0.47	4.73	0	0	0	0	0	0	0.19	0	0.46	2.04	0	0.06	0	0.16	0	0	0	0	0.4	0.2	0	0	0	0	0	0.41	3.57	0	0.23	0.23	0	0	0	0	6.91	0
Contig7004	0.07	0.1	0.19	0.03	0.22	0.12	1.01	3.61	1.64	1.89	4.36	2.85	3.3	2.41	1.71	4.18	1.69	0.78	1.62	5.17	2.42	0.83	1.3	1.69	1.25	1.6	7.92	1.43	1.61	1.1	1.94	2.31	4.67	3.09	3.25	1.23	0.96	1.57	0.62	15.25	1.68	2.22	1.64	0.95	8.81	3.23	9.45	4.1	7.21
W4a6109|c0_g3_i1	0.2	1.74	1.03	1.39	0.7	1.01	8.61	33.93	13.89	39.07	59.41	35.18	11.36	11.97	9.31	46.53	39.37	40.09	7.06	20.25	5.74	13.65	15.31	12.66	26.36	12.34	36.17	28.69	13.26	82.6	19.64	23.81	23.81	40.18	19.82	42.91	15.45	20.66	42.19	67.78	18.68	18.84	10.23	81.54	20.03	121.1	85.82	113.15	132.11
Contig9543	0	0	0	0	0.13	0.03	0	2.27	1.59	0	7.44	1.88	0.6	0.2	7.81	0	0	2.53	5.21	4.31	0.06	4.21	0.38	0.27	0.06	0.58	0.44	1.36	1.03	3.28	3.71	1.9	0	0.71	0.3	0.13	2.14	0.68	0.47	21.57	0.75	1.18	0	0.18	0	0	0.49	0.3	9.43
W3d28490|c0_g1_i1	0	0	0	0	0	0	1	5.86	0.99	1.25	0.31	9.41	53.62	0	2.69	0.39	0.6	161.54	110.68	7.37	25.89	2.31	144.85	0	0.51	0.1	0	193.5	0	0	0.11	37.06	0.16	149.27	0	0	11.6	0	1.24	0.15	90.18	0	0.28	0	0.42	0.3	1.68	152.57	1.73
W4a24457|c0_g1_i1	0	0.47	0	0.11	0.64	0.24	0	0.6	2.05	0.22	7.63	2.67	1.13	15.42	1.41	1.05	3.28	5.15	0.44	5.73	1.6	4.15	3.94	0.14	11.62	0.35	1.76	1.24	1	3.48	1.07	3.37	1.71	0.25	1.77	1.12	35.77	1.19	1.96	1.53	1.45	0.17	0.67	0.88	1.01	1.46	1.41	0.31	3.03
W4a23690|c0_g1_i2	2.41	0.95	2.23	3.33	2.57	2.3	25.72	11.75	2.74	12.57	10.17	11.5	15.48	29.79	42.01	19.98	4.28	5.81	23.56	15.6	9.37	7.07	10.06	21.23	11.11	10.83	38.04	12.11	8.44	5.2	15.64	16.08	8.31	2.19	4.77	12.73	14.73	23.51	16.49	29.17	17.63	2.13	3.58	7.94	4.75	11.63	30.57	14.08	11.47
W6b31090|c0_g1_i1	4.66	6.38	4.85	11.25	10.89	7.61	4.34	35.23	4.02	24.47	29.62	19.5	32.94	15.8	15.75	23.15	17.17	48.22	18.52	41.28	14.8	14.69	34.03	7.79	11.78	12.25	9.18	22.02	12.98	23.51	15.6	20.6	10.95	13.23	18.38	11.86	8.76	14.54	10.64	50.22	13.54	5.03	7.17	6.7	10.33	11.19	10.52	20.38	20.84
Contig8292	0	0	0.05	0.2	0	0.05	1.54	1.12	2.65	1.88	1.9	1.68	3.98	1.93	3.72	0.6	1.19	74.01	3.46	3.99	0.98	0.44	10.1	2.27	1.89	2.48	0.6	0.82	1.91	0.64	3.32	6.23	0.62	0.93	1.71	0.9	3.56	0.41	0.14	10.95	1.79	0.24	0.24	4.1	1.01	3.32	3.15	2.63	4.38
W3d20505|c0_g1_i1	0	0	0	0.13	0	0.03	0	0	4.11	0	0	0.69	8.18	6.61	0	0	0	0	0	0.17	0	0	6.82	0	0.64	0	0	0	0	0	0	1.18	0	0.3	0	0	0	0	6.06	0	0.96	0	0	0	0.46	0	0.38	0.04	0
W2b3014|c0_g2_i1	0	0.5	0	0.22	0.34	0.21	6.84	13.16	0.64	0.34	0.67	3.84	4.41	11.28	67.53	3.84	3.99	0	0.47	5.49	4.97	4.11	0.25	1.06	4.11	0.24	0.12	9.85	6.53	9.22	2.28	7.36	2.32	3.44	1.63	2.15	1.03	2.3	2.56	0.38	0.7	0.36	3.56	1.24	0.13	0.97	2.66	4.89	0.43
W6b29551|c0_g2_i1	1.81	0.18	0.82	1.81	1.49	1.22	1.9	2.11	0.94	8.04	3.97	3.16	3.03	5.59	1.44	5.74	16.58	14.01	6.92	2.4	0.08	2.61	10.24	7.01	3.98	1.53	1.83	0.48	3.53	0.29	7.53	4.99	0.82	3.99	2.03	0.63	2.4	0.76	2.12	134.28	0.1	1.6	0.39	0.91	1.78	2.56	2.44	1.78	34.19
Contig8942	1.57	1.06	2.02	1.09	1.16	1.38	3.45	10.45	10.41	5.31	14.58	8.21	21.32	24.75	9.53	13.62	15.49	9.06	18.68	12.7	17.93	11.03	14.6	13.59	16.67	8.25	8.03	10.23	16.97	3.84	5.96	13.28	10.73	7.38	8.14	9.15	7.09	8.65	12.24	7.69	3.91	8.91	3.03	2.82	6.29	5.75	5.25	6.09	9
Contig26928	0.49	0.47	0.07	0.7	0.14	0.38	0.2	4.75	10.19	2.03	9.04	4.47	7.49	6.16	6.98	4.72	1.46	8.47	7.9	5.88	4.13	6.92	1.79	2.38	1.53	3	4.04	5.86	2.63	1.58	3.22	4.53	3.62	1.04	2.05	1.52	2.05	3.65	3.68	3.84	4.14	2.28	0.73	1.37	1.95	2.01	2.46	2.49	3.02
Contig17730	0.53	3.77	1.84	0.07	1.02	1.45	4.43	11.66	1.77	17.14	16.12	9.1	19.97	15.21	1.96	14.58	7.48	5.04	29.04	16.84	2.82	3.08	5.39	2.03	41.19	3.62	18.2	47.95	32.36	8.88	24.03	15.77	24.8	6.48	4.89	14.31	6.53	1.8	27.16	0.31	12.86	7.79	2.36	1.28	2.17	9.19	1.68	8.75	10.35
W3d15315|c0_g3_i1	2.14	0.75	0	1.35	0.17	0.88	6.8	9.27	487.98	6.41	11.57	88.24	38.52	48.89	199.03	131.93	15.91	2.21	90.02	25.24	22.94	141.86	67.24	6.83	12.23	15.84	25.72	79.92	20.24	31.35	6.85	51.72	10.19	6.37	6.22	4.86	15.51	12.28	6.26	106.91	30.36	33.83	7.51	7.94	4.86	4.07	6.25	6.27	24.77
W4a5325|c0_g1_i4	0.3	0.26	0.69	1.01	0.5	0.55	2.24	1.68	1.13	0.8	0.77	1.26	1.48	0.89	0.06	1.61	0.83	2.52	1.38	2.11	1.07	2.32	1.05	0.82	3.29	1.3	2.26	1.79	0.82	1.81	0.85	1.49	0.1	1.06	1.07	1.53	1.07	2.68	1.04	0.47	1.34	1.41	1.57	1.08	0.94	0.2	0	1.57	2.08
W3d4694|c0_g1_i1	0.3	0.29	0.39	0.5	0.31	0.36	0.56	0.98	1.73	0.58	0.45	0.79	0.96	1.01	0.47	0.82	0.78	0.57	0.58	1.28	1.26	0.92	1.51	0.89	0.44	0.86	0.76	0.81	0.47	0.77	0.39	0.82	0.61	0.62	0.78	0.57	0.23	0.85	0.78	0.65	0.55	0.89	1.25	1.33	0.34	0.42	0.68	0.48	0.59
Contig38364	0.8	0.67	1.29	1.01	0.34	0.82	2.17	2.59	2.15	4.07	3.16	2.84	3.89	0.76	4.64	5.25	7.16	3.52	3.7	3.32	1.63	3.23	2.25	2.99	0.62	3.69	3.74	4.18	2.71	6.83	3.07	3.54	1.43	1.4	2.03	2.11	2.44	2.25	3.46	22.5	2.66	0.72	1.1	2.26	1.43	3.05	2.23	2.73	2.07
W6b3661|c0_g1_i1	0	0	0	0	0	0	0.17	0.29	0.69	0.31	0	0.28	0.95	0.78	0.47	0.34	0.17	0.9	0.43	0.4	0.72	1.15	0.17	0	0.13	0.17	0.51	0	0	0	0	0.38	0	0.54	0	0.58	0	0	0	1.55	0.38	0.49	0	0.21	0	0.26	0.23	0.15	0.41
Contig19997	1.16	1.02	0.9	1.82	1.56	1.29	2.94	2.24	17.04	2.06	17.53	7.17	12.88	14.69	10.6	2.72	1.57	2.92	5.99	11.45	12.47	2.88	5.14	2.09	4.32	8.25	10.34	8.27	3.98	1.61	6.59	6.78	6.81	8.81	1.63	3.15	2.37	4.11	2.86	12.3	1.93	1.77	1.16	0.5	4.92	10.52	2.7	6.44	11.17
W1a15897|c0_g1_i4	15.8	5.64	15.03	6.24	11.73	10.89	31.67	23.78	18.26	47.27	9.74	29.15	27.9	27.58	62.79	36.91	42.8	15.74	45.44	24.34	25.78	22.47	26.15	25.42	44.81	33.02	47.67	23.88	38.68	24.33	30.34	32.95	23.44	41.85	10.07	40.71	24.08	25.53	19.69	18.27	12.75	31.22	20.32	10.05	16	14.9	17.04	35.48	18.24
W7b6183|c1_g1_i3	4.94	0.32	1.51	0	0.57	1.47	4.35	1.08	1.05	9.33	8.89	4.81	44.46	9.57	10.02	0.95	2.91	0.87	39.45	2.27	22.11	22.23	5.4	0.13	11.14	13.43	0.18	29.16	23.33	9.99	22.97	14.24	8.05	6.35	11.34	1.4	5.15	16.47	10.59	2.45	22.69	5.69	1.66	2.02	49.92	6.34	7.66	9.63	0.07
W4a12757|c0_g1_i1	0	0	0	0	0	0	0	0	0.14	0.12	0	0.04	0	0	0	0	0	0	0	0	0	0	0	0	1.8	0	0	0	0	0.28	0	0.11	0	0	0.13	0.46	0	0	0	0	0.15	0	0	0	0	0	0.18	0	0.09
W3d22350|c1_g2_i2	101.86	74.94	91.79	64.18	69.46	80.45	158.27	162.64	135.81	162.47	140.9	150.36	608.65	254.67	313.51	155.15	149.93	139.72	206.94	405.61	375.22	164.71	339.24	307.29	334.92	169.67	175.55	229.25	278.15	145.21	125	256.76	438.77	267.31	142.52	137.86	173.7	158.67	207.31	80.61	243.9	174.31	96.59	147.73	127.91	90.22	254.99	151.18	131.41
W5c4280|c0_g1_i1	0	0.18	0	0	0	0.04	0	0.16	0	0	0.59	0.12	0	0.34	0.17	0.54	0.19	0	0	0	0	0	0	0	0.41	0	0.55	0	0.28	0	0.42	0.15	1.33	0	0	0.31	0	0.17	0	0.14	0	0	0	0	0	0.85	0.24	0.16	0.25
W3d25965|c0_g1_i2	0.19	0	0.07	0.1	0.43	0.16	0.04	0.03	9.36	0.27	6.88	2.8	3.03	4.57	1.85	0	1.11	0.71	4.33	2.9	2.32	0.08	20.51	0.99	2.16	1.89	1.59	2.82	1.45	0.9	14.8	3.58	1.53	0.31	3.3	1.34	1.42	3.54	0	3.39	3.53	2.47	1.22	0.37	1.67	2.75	0.49	1.58	1.47
Contig34628	0.41	0	0.14	0	0.57	0.23	0.57	13.3	5.45	2.27	2.14	3.96	2.68	0.59	21.88	0.55	0.57	9.06	10.68	3.68	2.02	2.26	69.35	0.1	0.71	5.84	0	19.84	1.04	4.44	17.73	9.11	0.19	1.51	0.8	0.07	4.15	17.23	4.37	32.26	27.25	0	6.01	0.1	7.78	0.12	2.43	0.32	2.04
W2b13702|c0_g1_i3	0	0.12	0.22	0.22	0	0.11	0.39	0.11	0.25	1.83	0.54	0.56	0.4	2.06	5.98	0	0.13	1.59	0.16	0.89	0.21	0.28	0	0.45	0.56	0.61	1.49	0.33	1.24	0.26	0.42	0.9	0.4	0.26	0	0.75	0.17	1.49	1.43	1.14	0.14	1.62	0.36	0.93	0.13	0.19	0	1.05	0.9
Contig11499	1.3	0	0.54	0.66	0.43	0.58	0.94	0.92	40.69	0.68	16.4	10.58	20.06	13.44	25.4	7.15	3.6	2.99	0.98	35.61	3.95	3.48	0.44	3.08	21.25	3.68	11.2	9.75	9.19	10.29	19.36	10.78	19.08	3.29	15.32	7.29	10.26	9.6	5.47	3.78	5.9	2	0.68	0.8	1.95	13.28	2.75	27.42	7.13
Contig29943	0	0.06	0.35	0	0.15	0.11	0.71	0.34	0.7	0.68	0.31	0.54	1.33	0.47	0.79	0.9	2.23	0.79	1.29	0.54	0.68	1.23	0.58	0.07	0.72	0.56	0.68	1.1	0.61	0.72	0.65	0.84	1.2	0.36	0.4	0.79	0.63	0.26	0	3.47	0.26	0.99	0.41	0.78	0.74	0.26	0.91	0.48	1.99
W5c23559|c0_g1_i7	0.04	0.04	0.19	0.08	0.04	0.08	0.62	1.42	0.35	1.73	0.23	0.72	1.58	1.3	0.79	1.06	1.76	0.5	0.86	0.91	1.56	1.36	1.3	0.83	0.58	1.93	0.3	0.37	0.95	1.13	0.83	1.05	2.42	0.95	0.64	1.22	0.94	0.24	0.16	0.2	0.34	0.5	0.55	0.11	0.92	1.59	0.91	0.77	0.66
Contig11316	4.98	5.41	1.39	0	2.38	2.83	7.33	7.97	53.41	2.55	20.11	19.63	15.93	12.52	28.44	58.8	15	26.28	14.5	0.43	78.6	47.38	67.32	56.88	52.37	70.99	7.08	38.54	18.57	24.35	22.45	34.55	48.39	5.98	32.9	22.16	5.12	74.14	8.77	33.52	9.84	6.28	1.03	4.33	12.69	3.72	12.63	175.29	19.62
W1a28209|c0_g1_i1	4.63	4.47	1.72	0	2.51	2.67	7.62	7.19	56.56	2.11	22.19	20.38	15.53	14.82	26.59	54.69	16.58	25.53	10.93	0.57	71.87	36.66	60.6	59.98	56.19	77.31	7.36	35.9	18.77	25.51	20.37	33.46	48.66	6.14	32.12	21.77	6.48	76.9	8.51	30.4	12.2	5.61	1.72	3	12.24	5.24	13.34	169.94	19.98
Contig21330	6.9	11.17	7.2	3.01	3.14	6.28	24.14	56.91	450.21	41.79	126.34	126.55	470.21	250.51	351.55	136.01	151.03	69.22	152.21	369.46	282.66	162.67	808.15	191.55	303.85	277.47	130.37	168.5	198.99	241.87	40.95	250.38	154.88	39.07	248.72	127.17	138.13	91.19	130.88	170.75	22.21	37.98	44.12	38.98	240.99	82.66	155.73	360.88	165.39
Contig11089	21.43	23.21	11.29	22.85	22.02	20.16	57.51	204.7	832.73	138.83	179.48	244.53	477.71	376.6	281.45	542.48	293.53	122.65	540.13	516.21	244.84	551.76	333.52	162.91	140.23	169.83	542.89	311.86	548.06	731.18	247.22	375.53	347.03	145	311.48	215.4	171.73	123.86	247.65	401.69	98.18	147.35	55.69	152.15	274.66	234.21	212.02	188.57	249.85
W5c870|c0_g1_i1	0.48	2.18	0.97	0.56	1.55	1.15	1.61	2.65	2.71	3.59	2.02	2.15	2.63	4.17	1.15	2.48	2.25	1.83	2.55	2.78	1.32	2.3	2.53	5.85	4.43	1.07	1.56	1.23	2.52	1.97	2.66	2.49	1.26	4.62	3.13	2.82	2.79	1.72	2	1.43	5.25	2.94	1.11	3.68	1.68	4.58	1.24	3.07	2.78
W6b20116|c2_g1_i3	0	0	0	0.09	0.09	0.04	1.95	7.25	1.12	3.56	4.07	2.99	2.95	1.55	0.27	1.18	7.36	6.66	1.12	1.53	5.63	2.93	1	5.28	0.22	115.36	15.24	7.47	0.99	1.46	14.22	10.13	1.6	0.31	5.87	1.03	2.72	14.49	31.87	18.43	2.56	0.29	2.69	5.29	1.6	7.97	5.8	9.31	0.99
Contig12145	0.36	0	2.13	0.28	0.19	0.59	57.61	0.57	3.97	0.42	5.9	11.58	23.32	64.83	4.66	1.01	1.89	0	10.75	7.03	0.57	1.48	5.46	7.55	6.77	5.18	4.4	19.42	3.6	5.24	5.17	9.38	5.64	1.94	9.19	7.26	11.96	1.36	14.48	5.5	9.52	0.51	1.51	7.39	0.91	1.47	10.92	4.54	2.16
W4a23690|c0_g1_i4	3.59	0.3	2.64	7.19	2.68	3.28	44.68	18.79	0.91	27.93	17.87	19.23	29.22	23.94	75.23	22.03	3.17	20.93	22.92	29.31	22.17	4.62	14.26	24	13.78	14.86	63.44	17.89	18.44	6.38	42.9	24.71	9.38	5.45	6.66	26.91	28.34	35.27	41.27	52.51	14.45	6.18	6.37	18.21	9.72	28.37	62.77	22.45	24.72
W4a13243|c0_g1_i1	0.17	0.2	0.29	0.15	0	0.16	0.3	0.8	0.84	1.02	0.53	0.67	1.68	0.08	0.64	0.41	1.44	0.35	0.51	0.63	0.8	0.74	0.62	1.59	3.12	0.48	1.02	0.82	0.63	0.95	0.51	0.9	0.46	0.39	0.41	0.71	0.73	0.79	1.15	1.22	0.64	0.89	0.29	0.41	0.48	1.14	0.76	0.47	1.28
Contig31394	0.25	0.87	0.39	0	0.7	0.44	3.41	9.9	1.64	13.13	16.45	8.08	27.39	14.31	11.88	10.25	21.72	10.45	8.17	26.21	4.19	7.61	10.47	14.8	5.04	11.64	22.28	12.88	14.17	14.33	5.91	13.35	10.51	5.9	3.31	10.53	2.73	8.34	6.15	26.77	10.66	6.76	3.46	4.16	14.11	18.09	19.17	19.62	16.47
W2b26570|c2_g3_i2	2.36	1.93	1.72	2.52	10.45	3.8	33.23	230.41	1106.97	70.03	156.84	266.53	176.08	333.77	284.14	179.36	145.85	137.14	131.75	283.49	72.31	392.13	162.26	90.15	61.32	161.06	484.21	148.38	307.24	375.33	114.82	212.67	134.48	76.02	118.9	152.13	62.77	54.42	123.97	189.82	122.3	58.11	34.34	111.42	121.27	127.99	39.49	95.3	130.37
W6b18327|c0_g1_i1	2.75	0.3	0.61	1.5	2.39	1.51	2.44	2.51	4.94	5.16	5.31	5.9	7.19	4.26	10.09	7.71	5.28	5.35	5.31	7.59	6.33	8.49	6.18	9.52	3.6	7.42	11.79	11.21	3.25	2.59	13.22	7.18	4.06	4.68	5.13	12.38	7.3	6.15	5.67	5.77	2.65	5.28	1.4	3.42	5.3	6.39	25.91	13.21	10.09
W4a5084|c0_g1_i1	35.01	17.25	12.66	25.17	14.43	20.9	75.69	94.17	59.08	40.69	51.82	57.48	84.27	102.52	66.04	49.66	79.3	132.56	45.06	94.65	63	41.07	57.33	99.93	99.99	41.11	119.89	42.18	66.86	27.69	82.73	73.47	77.72	67.21	39.93	44.4	47.65	91.83	55.83	85.28	63.27	38.33	61.3	30.08	63.36	34.37	91.24	89.86	96.31
Contig39357	30.54	22.35	10.69	16.93	24.33	20.97	76.11	111.68	1471.61	143.49	234.57	357.67	1090.17	730.61	410.16	468.46	230.88	156.86	517.46	1168.22	664.74	484.13	802.26	410.11	219.09	361.32	561.03	536.31	478.19	673.22	219.54	535.93	445.26	163.07	450.8	395.47	334.28	324.27	274.02	414.76	67.13	159.77	119.2	137.76	534.92	239.94	272.53	623.58	458.12
W3d5054|c1_g2_i1	0.41	0.93	1.06	0	0.48	0.58	4.25	9.92	75.66	5.86	39.96	29.28	309.74	140.52	70.14	58.58	20.8	36.79	15	148.71	146.3	16.43	228.41	95.05	63.56	82.64	22.25	134.14	6.73	16.38	12.99	85.53	18.45	11.65	55.61	62.87	26.07	43.17	7.14	58.03	2.38	17.52	19.69	2.63	175.44	17.03	44.64	262.64	42.9
W3d13826|c0_g1_i2	1.6	0.82	1.13	0.16	0.25	0.79	3.77	6.19	55.87	4.36	40.61	24.98	210.47	89.93	54.05	31.54	12.31	20.69	21.28	127.63	98.22	9.73	127.68	60.96	32.81	53.8	14.46	67.04	7.28	10.57	14.42	56.05	12.96	13.88	47.77	42.38	25.66	29.98	5.25	41.51	6.13	16.39	9.62	4.41	97.02	15.36	20.84	121.04	22.43
W6b30534|c0_g1_i1	0.27	0	0	0.35	6.31	1.39	0.54	9.37	283.95	0.72	2.66	49.59	1.35	21.04	65.21	1.93	0.13	0	0.98	47.13	2.64	3.83	18.92	0.63	0.58	1.65	1.29	6.59	0.4	5.47	0.74	9.5	0.21	0.96	0.39	7.15	6.6	8.94	0.33	245.52	9.89	0.19	2.04	22.06	0	0.4	0.69	2.33	26.82
W4a14638|c0_g1_i1	1.03	1.39	0.71	0.18	0.18	0.7	0	51.64	5.1	30.17	22.9	18.32	0.16	0	0.18	0.3	30.3	0	71.95	450.03	212.17	0.57	0.2	89.32	48.02	0.39	42.76	0	0	0	0.57	49.84	0.16	60.17	0	0.17	18.75	118.67	0.26	0.15	0.33	50.29	0	0	0.86	0	4.37	0	212.84
W6b17727|c0_g2_i1	2.84	0.91	0.32	0	0.99	1.01	3.21	1.86	0.94	1.85	1.97	1.67	2.05	3.37	0.68	2.36	0.75	0.39	5.51	1.3	2.01	1.45	1.11	1.33	0.41	0	0.73	1.92	1.97	0.96	1.66	1.58	1.33	3.29	0.92	1.73	1.51	0.84	1.17	3.76	1.02	1.59	0	0.68	2.75	0.57	1.94	1.96	1.32
W7b29369|c0_g1_i1	0	0	0.27	0.14	0	0.08	0.4	0.98	0.08	0.21	0.17	0.31	0	0.5	0.14	0	0	0.16	1.06	0.18	0.07	0	0	0	0.98	0.3	0.23	0.2	0	0	0.7	0.24	0	0.16	0.15	0.2	0.53	0.28	0.2	0.29	0.52	0.22	0.55	0.1	3.31	0	1.23	0.04	0
Contig14708	0	0	0	0	0	0	15.17	46.18	0	41.07	0	17.35	0.16	0	5.21	0	0	0	0.37	9.12	0	0	20.87	0.24	0	9.71	36.09	32.01	0	0	188.78	15.92	85.63	0	132.04	6.95	0	108.46	0.25	0	0	0	46.87	0	96.7	0	0	39.56	0
W6b30096|c0_g1_i1	0.62	1.73	2.01	1.73	1.68	1.55	1.51	4.81	4.02	3.25	3.09	3.23	1.71	2.09	2.95	1.58	2.61	1.7	2.17	2.21	1.58	2.42	2.36	1.77	2.14	7.89	5.05	3.67	2.25	3.58	1.67	2.71	1.13	2.39	5.07	2.41	2.74	2.2	1.62	10.14	3.51	1.83	1.71	2.73	3.65	6.38	2.92	2.1	3.01
Contig41402	0.18	0.04	0.31	0.27	0.47	0.26	3.96	1.48	2.28	1.12	1.88	2.42	6.83	4.38	1.85	1.38	1.71	2.93	0.77	3.52	1.99	2.82	1.02	0.58	0.65	0.43	0.7	0.65	0.54	0.6	0.79	1.8	2.64	2.54	2.1	4.58	0.42	4.33	2.79	0.37	1.27	3.04	1.12	1.89	3.71	1.55	3.07	0.73	1.97
Contig5953	0.37	0.37	0.61	0.38	0.51	0.45	0.68	0.57	0.89	0.44	0.53	0.62	0.41	0.62	0.41	0.63	0.84	0.32	0.6	0.57	0.43	0.8	0.47	1.18	0.52	0.5	0.74	0.5	0.27	0.58	0.78	0.59	0.34	0.73	0.92	0.56	0.46	1.12	0.5	0.53	0.57	0.82	0.81	1.01	0.63	0.33	0.45	0.73	0.93
Contig36200	1.57	1.88	1.15	1.48	0.86	1.39	3.2	5.61	4.8	3.35	3.7	3.94	3.91	3.47	3.17	1.94	1.86	1.65	5.05	2.26	2.71	2.69	1.64	2.65	3.64	5.15	5.63	3.61	1.86	2.47	4.87	3.17	5.42	3.41	5.97	5.31	3.22	3.84	3.43	2.53	2.34	5.05	2.13	2.21	3.58	2.71	3.29	4.86	3.37
W3d8158|c0_g1_i1	0	0	0	0	0.25	0.05	0.1	0.08	0.67	0.17	7.28	1.38	0.38	0	0	0	0	0.2	0	0	0.24	0.43	5.88	1.02	0.77	0	0.09	0.9	1.73	1.88	0.32	0.73	0.08	0.4	0.19	0	1.29	0.43	0	8.2	0.21	0.14	0	0	0.6	0.29	0.12	0.05	4.53
Contig40228	0.67	0.16	0.72	0.65	0.73	0.59	1.17	8.26	13.26	3.8	4.28	6.28	6.63	5.22	2.09	4.9	2.42	3.11	3.46	8.65	4.52	4.6	7.13	4.7	0.85	4.68	1.13	2.27	8.03	1.96	2.03	4.13	4.12	3.25	3.81	4.6	6.01	1.64	2.07	5.8	4.72	1.17	0.23	1	2.27	0.25	7.43	12.49	7.47
W2b10598|c0_g1_i2	2.3	1.66	1.84	0.99	1.5	1.66	5.11	4.91	5.13	4.86	3.81	5.08	4.17	3.81	11.09	5.13	7.35	4.91	2.34	4.08	2.51	3.14	4.28	5.22	3.71	2.91	4.38	4.31	3.01	2.77	3.4	4.34	3.05	3.57	3.94	4.11	2.53	4.38	4.2	4.49	2.87	4.73	7.92	4.58	2.83	3.44	5.68	3.47	6.63
W3d23217|c0_g1_i1	0.1	0.2	0	0.09	1.16	0.31	18.55	27.98	0	0	62.93	19.6	25.24	23.94	0.09	0.2	0.1	0.11	0.12	0.59	20.4	0.11	34.84	9.6	2.15	19.91	36.12	31.7	30.94	0.31	0	12.45	14.59	42.27	0	21.78	0.82	1.28	8.13	0.08	18.12	9.35	0	15.75	0.85	13.8	1.45	0.23	11.36
Contig9043	1.44	0.57	1.66	1.99	4.2	1.97	4.1	6.48	3.26	6.3	3.67	4.54	3.53	11.04	3.7	1.25	2.65	0.93	2.41	5.84	6.12	1.14	3.88	9.38	2.31	5.93	2.91	3.55	4.29	1.88	5.65	4.13	6.34	5.39	2.58	5.55	2.16	3.68	2.51	3.15	4.25	3.1	3.42	2	1.03	3.84	1.91	3.6	5.2
Contig25472	2.21	1.96	1.55	0.19	1.38	1.46	2.35	5.17	5.25	2.19	4.03	5.38	4	3.97	2.4	5.26	5.06	4.78	6.3	9.76	2.32	1.7	3.14	4.13	0.59	3.45	2.2	7.05	5.31	3.08	5.19	4.19	7.54	2.3	4.5	2.97	3.72	5.82	4.38	3.04	1.52	3.25	1.73	2.96	2.76	4.13	4.02	4.28	4.95
W6b30185|c1_g1_i1	1.16	2.1	1.43	1.51	1.18	1.48	2.56	2.77	1.5	1.59	2.35	2.24	2.77	3.04	1.8	2.38	2.24	1.16	2.35	0.76	2.35	1.92	1.14	4.26	2.02	2.09	2.51	1.77	1.12	1.42	1.92	2.05	1.3	2.7	1.13	2.1	1.03	2.31	1.06	4.46	2.1	2.88	3.16	1.49	1.33	3.07	1	1.61	2.02
Contig30865	2.37	1.56	1.38	0.88	1.18	1.47	29.45	55.12	54.58	51.41	130.91	62.34	36.36	36	25.5	28.76	11.4	5.33	40.42	18.28	22.82	26.32	22.55	27.94	19.95	10.75	6.05	19.44	8.56	37.58	23.77	22.51	9.99	20.36	34.15	18.06	15.3	26.87	29.26	53.1	29.74	5.82	11.68	9.15	17.9	10.13	89.08	50.92	41.61
W5c30073|c1_g1_i9	0.26	0.35	0.04	0.09	0.04	0.16	1.63	2.14	1.57	2.36	0.32	1.68	3.29	0.5	5.02	0.49	2.95	0.37	2.67	6.5	0.42	4.04	0.25	5.55	1.22	1.4	0.89	0.13	0.61	1.3	0.11	1.98	4.15	2.87	1.24	0.94	0.68	3.18	1.77	0.56	0.22	0.21	1.55	1.1	2.02	0.38	0.33	1.95	1.2
W2b16352|c0_g1_i5	0.52	0.6	0.87	0.3	0.36	0.53	2.03	1.01	0.66	1.08	1.42	1.19	1.26	1	2.7	1.32	0.92	1.27	1	0.92	0.72	1	0.27	2.17	0.58	1.63	1.69	0.9	0.55	0.92	0.57	1.13	0.86	1.39	1.69	0.66	0.8	1.21	0.8	1.24	0.94	1.42	0.71	1.19	0.9	0.81	0.97	1.38	1.49
Contig12268	0.97	0	0	1.17	0	0.43	0.19	6.83	37.43	17.73	41.68	17.92	3.68	12.41	5.27	63.82	47.44	0.9	23.14	14.76	1.74	41.74	6.44	3.62	0	32.32	0.37	23.43	0	136.81	2.87	22.14	0	1.19	17.9	7.09	20.3	3.01	20	33.27	5.03	16.41	0	0.46	7.85	0	56.2	10.65	258.95
W5c26913|c0_g6_i1	2.21	0.58	1.04	0.17	1.75	1.15	138.22	20.16	0	2.86	53.51	39.26	81.48	31.18	18.14	16.01	6.41	31.51	16.6	6.92	8.07	2.43	12.4	17.17	2.32	15.61	20.18	18.73	9.86	0.62	5.75	16.92	6.76	15.01	36.45	4.86	17.63	6.08	0.75	25.03	3.49	9.31	2.77	2.17	2.93	16.24	12.67	9.3	7.67
Contig44339	3.2	0.55	0.38	0.41	1	1.11	2.86	12.86	12.66	5.9	3.27	6.72	7.55	26.64	1.65	3.2	7.35	6.91	19.3	0.66	19.6	9.13	5.64	0.87	1.78	0.73	16.15	25.2	3.88	9.92	0.67	8.78	2.34	0.17	1.66	2.1	11.94	16.03	13.84	1.34	0.66	7.41	3.39	7.15	22.78	0.2	1.56	2.5	25.67
Contig45248	3.17	0.88	3.63	15.55	4.34	5.52	11.62	15.39	129.9	14.92	32.15	45.65	37.87	85.73	5.4	48.67	47.58	49.51	30.99	158.28	5.69	53.73	50.57	33.75	8.62	29.17	45.04	11.64	17.73	30.96	44.72	41.88	17.47	5.87	48.9	17.99	17.05	38.79	89.75	87.55	64.81	2.33	1.46	7.97	17.45	10.16	59.03	60.7	20.43
W3d23504|c0_g1_i1	0.68	0.24	0.21	0.48	0	0.32	3.98	1.53	3.82	6.2	2.53	3.59	5.8	2.33	5.06	2.21	0.5	4.3	2.19	2	1.73	5.06	13.89	5.82	1.35	3	2.4	7.54	4.49	3.05	4.18	4.05	5.06	0.57	1.27	3.58	0.83	4.81	5.7	5.41	1.48	1.83	1.12	0.45	1.49	2.05	1.92	6.33	5.78
W2b21889|c0_g1_i1	0.15	0	0	0.33	0	0.1	0.54	1.71	0.15	3.97	1.53	1.32	5.2	0	2.41	0.22	0	0	6.35	1.5	2.33	0	0.3	0.18	0.33	0	0.45	4.3	0.11	0.24	2.2	1.37	0.78	2.36	0.6	0.26	0.2	0.48	0.95	0.57	3.25	1.08	0	1.94	0.48	0.12	2.97	1.14	0.08
Contig35238	0.56	0.27	0.16	0.16	0.89	0.41	2.08	1.6	4.3	0.33	4.59	2.87	5.46	2.64	2.4	0.93	0.65	1.29	3.48	4.89	1.59	1.32	1.86	3.08	1.07	3.9	1.12	2.94	2.41	2.31	9.32	2.77	2.17	2.18	1.88	1.81	2.03	2.63	4.64	5.55	3.21	1.04	0.7	1.72	2.17	1.87	2.74	2.81	3.8
Contig32897	0.55	0.65	0.61	0.14	0.17	0.43	0.91	24.79	7.41	2.04	5.08	7.12	11.83	4.09	0.32	3.46	8.6	0.57	5.19	14.5	4.8	5.26	3.53	5.6	3.2	2.32	7.45	3.65	3.59	3.67	2.14	4.94	2.66	1.5	3.45	9.1	0.74	6.61	2.84	7.44	4.16	1.39	1.42	1.28	2.39	6.39	0.61	3.64	8.04
Contig29891	0.13	0.44	0.67	0.34	0.17	0.35	0.98	1.18	0.06	1.4	2.39	1.05	1.57	1.52	0.41	0.44	1.7	0.67	1.27	1.2	0.54	0.29	1.92	0.54	0.33	1.12	0.95	1	1.26	0.6	0.5	0.94	1.18	0.67	0.95	0.16	0.43	1.05	0.89	2.36	1.35	0.64	0.27	0.16	0.54	0.49	0.5	0.83	0.56
W4a14368|c0_g1_i1	0.13	0	0	0.65	0.44	0.24	0.38	2.16	0.25	2.23	2.61	1.4	2.04	0.56	0.56	1.08	0.87	1.55	1.06	1.29	0.92	0.96	0.98	0.59	1.45	2.14	0.48	0.85	0.37	3.96	1.24	1.21	1.57	0.77	0.61	0.31	0.33	2.23	3.1	0.37	0.27	1.41	0.52	0.45	1.57	0.94	1.45	0.53	1.62
W5c3371|c0_g1_i1	0	0.17	0	0	0.94	0.22	1.44	5.35	3.94	2.09	0.57	2.84	4.49	0.48	0.32	3.29	1.98	4.47	0.66	0.62	0.15	2.38	2.12	2.33	0	4.62	0	26.48	15.85	4.24	0	3.92	11.44	3.51	0	0.3	1.92	0.16	1.57	0	24.88	0.51	1	0.87	0	0	0.7	34.9	7.07
W6b697|c0_g1_i4	0.61	1.78	0.7	0.71	0.54	0.87	1.02	1.6	2.03	1.91	3.31	1.86	1.19	2.65	3.48	1.57	1.53	1.37	0.75	1.76	1.01	2.02	0.6	1.2	1.55	3.78	1.19	2.08	1.45	1.98	1.01	1.69	0.72	1.36	0.6	1.11	1.9	1.36	2.16	4.3	1.89	1.44	1.84	0.98	0.96	0.46	3.42	1.32	5.02
W3d22353|c0_g1_i1	0	0	0	0.15	0	0.03	1.01	3.59	2.66	1.2	1.23	4.27	20.99	0.45	0	1.77	8.87	1.9	0.41	1.54	1.79	0.92	28.11	0	0	0.79	0.32	11.8	8.61	7.88	0	5.06	0.26	2.75	1.14	4.48	5.13	0.75	2.91	0	8.19	3.3	1.62	0	0	0	0	18.73	12.19
Contig38083	1.05	1.48	0.41	1.57	0.33	0.97	17.29	2.43	0.38	4.17	5.19	9.54	18.33	6.05	3.25	20.26	14.01	1.58	3.25	2.08	8.37	2.52	13.66	5.14	0.69	1.99	2.49	20.4	2.56	3.8	0.32	6.88	1.2	2.05	1.48	5.73	1.52	3.91	5.92	14.65	29.94	3.22	4.48	0.69	2.19	4.57	11.43	3.03	11.34
W2b10575|c0_g1_i5	0.24	0.39	0.17	0.1	0.24	0.23	1.08	0.66	0.2	0.68	1.17	0.66	1.24	0.71	1.46	0.34	1.11	0.78	0.63	1.1	0.29	0.44	0.63	0.47	0.17	0.15	0.46	0.27	0.36	0.69	0.13	0.6	0.19	0.33	1.39	0.83	0.58	0.78	0.49	1.06	0.26	0.5	0.17	0.1	0.17	0.48	1.39	0.56	0.58
W6b28168|c0_g1_i2	0.47	0	0	0.1	0	0.11	0	2.88	6.81	9.34	40.18	10.03	1.09	5.61	3.13	22.49	18.84	0.48	5.53	5.09	0.48	13.2	0.11	0.27	0	22.2	0	8.2	0	44.26	1.54	8.03	0.18	0.48	6.45	3.69	10.38	1.35	8.96	46.15	1.14	5.4	0	0.14	1.09	0	29.85	3.96	114.98
W5c15989|c0_g1_i2	0.11	0.11	0.67	0	0.29	0.24	0.22	0	7.15	0.59	1.62	1.74	5.09	1.39	0.5	0.64	1.11	0.34	2.03	1.91	0.91	1.34	0.22	1.04	0.08	0.74	0.43	2.35	0.17	2.38	0.12	1.2	3.13	0.57	0.75	2.32	0.74	0.3	0.55	0.57	0.6	0	0.15	0.4	0.12	0.5	2.57	1.84	0.44
Contig12624	0.77	0.56	0.42	0.42	0.42	0.52	6.28	1.03	1.34	4.39	12.01	5.59	9.69	9.57	10.8	4.27	2.02	0	5.64	8.33	8.55	0.53	3.03	3.28	4.61	4.03	2.89	5.98	5.25	3.85	1.92	4.96	4.23	3.17	3.75	1.53	2.44	1.55	5.03	2.35	5.66	7.05	3.6	2.32	4.73	0.43	3.48	2.47	6.57
W5c9432|c0_g1_i2	0.39	0	0	0.08	0.34	0.16	0.1	6.34	0	1.12	5.53	2.38	0	6.53	4.91	0	0	0	2.11	0	1.74	0	0.09	0.11	0.98	0.09	2.23	1.31	0.57	0	9.02	1.56	19.97	1.97	1.22	0.08	1.28	0.69	0.24	2.2	0.1	0.14	0.53	0	5.92	0.14	6.32	8.76	0.22
Contig22966	0.1	0.44	0.15	0.33	0.35	0.27	7.04	6.83	1.9	9.04	13.47	6.9	2.69	2.36	1.11	3.17	11.81	5.97	2.67	1.48	1.47	0.17	1.06	7.83	2.57	0.62	20.78	2.31	0.51	3.09	7.18	4.15	2.94	2.58	2.45	14.99	2.38	6.44	6.44	14.41	7.42	3.3	3.07	11.94	3.21	4.16	5.46	2.78	6.16
W1a9996|c0_g1_i3	0.76	0	0	0	0	0.15	6.48	0.16	5.28	8.48	5.57	7.05	0.15	18.86	7.49	3.29	0	17.49	1.16	4.81	0.16	1.47	1.31	2.68	0.96	1.62	3.5	1.29	0.57	1.94	54.77	6.5	1.49	17.16	6.47	0	3.8	2.54	1.89	176.09	0.41	0	0.53	0	2.18	4.28	1.72	21.75	85.7
W4a12339|c1_g1_i1	0.21	0.56	0.35	0.68	0.29	0.42	1.48	0.64	0.57	0.92	1.07	0.91	0.48	0.48	0.26	0.55	0.86	1.06	0.8	1.98	0.94	0.9	0.36	0.77	1.61	0.51	0.64	0.49	0.28	0.84	0.68	0.76	0.51	0.93	0.96	1.13	0.77	0.73	0.97	0.64	1.52	0.81	0.34	0.3	0.81	1.29	1.75	0.93	1.12
Contig27113	2.15	0.55	0.98	2.78	0.75	1.44	7.36	12.05	3.89	10.5	23.88	10.07	4.11	9.62	5.88	7.2	5.92	8.85	3.82	7.22	2.4	3.3	5.67	4.6	5.68	5.28	4.76	5.39	2.5	2.12	6.61	5.31	8.94	5.7	3.81	5.6	6.75	16.71	25.41	20.18	10	1.1	1.48	7.04	7.22	3.96	14.9	7.56	18.11
W5c24659|c0_g1_i3	0.76	1.18	1.15	1.16	0.96	1.04	3.55	2.2	4.84	3.21	1.03	2.59	1.4	1.71	0.68	1.9	5.16	1.5	1.41	1.4	1.81	1.28	1.71	1.7	1.85	1.65	4.66	1.23	1.38	2.43	1.86	1.93	4.68	1.79	1.97	1.94	1.47	1.29	2.38	1.97	1.39	2.53	1.52	3	1.94	1.13	2.77	2.09	1.6
Contig33012	0.98	0.85	0.36	0.54	0.45	0.64	4.5	4.08	2.51	2.81	5.18	4.27	2.81	3.09	4.76	2.18	3.09	4.05	1.7	3.03	1.4	2.04	3.14	1.94	1.23	1.66	1.8	3.29	1.65	2.11	2.16	2.48	1.94	3.23	1.55	3.75	3.99	1.42	0.9	11.12	3.42	2.68	2.14	3.1	4.15	4.25	2.26	2.41	10
Contig13772	0.6	0.32	0.39	0.54	0.55	0.48	10.9	12.82	2.53	17.19	26.21	13.29	5.55	3.2	2.85	4.98	18.91	14.33	4.78	2.48	2.44	0.88	3.36	9.74	5.36	1.66	31.08	2.89	1.04	4.37	11.24	6.9	1.73	2.85	4.04	25.01	3.73	11.41	8.79	19.53	15.11	3.91	3.36	20.38	1.98	6.41	11.16	4.03	10.89
Contig36091	0	0	0.28	0	0	0.06	0.16	0.39	0.16	0.14	0.67	0.34	0.25	0.43	0	0	0	0.17	0	1.29	0.52	0	0.31	0.19	0	0.15	0	0.14	0.24	0.16	1.06	0.26	0	0.16	0.47	0.13	0.43	0.28	0.4	2.24	0	0.22	0	0.38	0.17	0.96	0.62	0.72	0.69
Contig29402	0.55	0.27	0.47	3.11	0.6	1	10.07	6.81	3.01	19.05	27.53	11.42	8.9	8.98	3.21	3.84	6.47	4.7	6.71	13.95	3.96	7.43	0.95	1.29	0.8	2.35	14.53	1.52	5.44	2.25	1.98	5.22	6.26	16.1	9.5	4.83	4.04	1.35	4.79	23.91	3.14	3.49	5.33	4.97	18.11	12.6	11.36	10.8	26.64
Contig12016	1.18	1.77	0.11	0.28	0.4	0.75	0.13	28.66	2.4	18.67	11.63	10.25	0	0	3.92	0.94	6.54	0.81	238.28	374.84	46.32	0.07	0	4.37	0.47	0.12	19.74	0	0	0	2.16	36.77	0.05	23.4	0	1.15	7.75	27.09	0	1.01	0.64	19.12	0	0	2.39	0	0.93	0	87.39
W4a9166|c0_g1_i1	0.41	0.18	0.24	0.29	0.5	0.32	1.37	1.18	0.8	1.38	0.69	1.03	0.88	0.97	0.56	0.71	0.88	0.46	0.85	0.78	0.68	0.67	0.49	0.97	2.27	1.31	0.62	0.78	0.74	0.45	0.55	0.82	0.95	1.8	1.13	0.75	0.47	0.8	0.57	0.46	0.62	1.27	1.15	0.84	1.02	1.24	0.76	0.77	0.83
W6b22751|c0_g1_i5	0.62	0.04	0.37	0.13	0.07	0.24	0.46	0.54	0.12	1.34	0.53	0.65	0.24	0.48	0.28	0.59	0.46	0.16	0.61	0.44	0.25	0.51	0.38	0.36	0.59	0.81	0.22	1.02	1.9	0.99	0.21	0.55	0.45	0.12	0.45	0.45	0.1	0.79	0.14	2.68	1.13	0.22	0.32	0.05	0.85	0.58	0.5	1.31	1.23
W5c23481|c0_g1_i1	0	0	0	0.23	0.12	0.07	0	0.77	0.8	0	1.12	0.45	0.1	0.12	0.48	0	0	0.28	0	0	1.76	0.59	0	0.47	0.1	0.38	0.52	0.23	0.9	0	0.44	0.34	6.42	0.14	0.65	0	0	0.36	0	0.1	0	0.19	0	0.16	0.14	0.2	2.6	0.6	0.49
Contig45342	13.04	7.32	9.65	3.38	68.64	20.41	285.34	242.59	144.21	69.46	27.53	151.9	81.68	81.7	103.55	34.52	14.68	125.99	93.83	314.27	172.86	8.44	113.17	30.37	55	23.89	107.26	100.25	142.38	19.85	174.85	94.66	43.48	45.66	68.26	109.8	53.64	76.67	194.44	162.25	248.98	36.99	15.08	114.05	217.85	103.77	111.78	111.37	217.2
W4a22852|c0_g1_i1	0	0.24	0.21	0.11	0	0.11	1.35	1.11	0.24	0.55	1.02	0.8	0.76	0.55	0.33	0.47	0.61	1.14	0.45	1.69	1.3	0.13	0.36	0.72	1.42	0.58	0.71	0.52	0.09	0.5	0.81	0.69	0.38	0.75	0.12	0.92	0.81	1.09	1.67	0.27	0.53	0.86	1.52	0.44	0	1.65	1.26	0.76	0.93
W7b744|c0_g1_i2	0.08	1.28	1.21	0.65	0.79	0.8	2.73	1.77	2.3	2.88	3.55	2.36	3.8	2.22	2.15	2.46	0.41	3.42	2.32	1.24	2.65	2	1.95	1.26	1.8	2.67	2.72	1.54	2.46	0.34	5.2	2.24	1.3	1.1	2.89	1.73	1.65	2.73	3.59	2.69	1.26	4.53	3.2	1.29	10.01	2.23	2.03	3.6	2.2
W7b20638|c0_g1_i1	5.65	17.14	11.13	11.21	12.14	11.46	27.06	19.13	59.98	27.48	31.21	29.4	25.26	27.78	18.37	10.84	25.16	30.23	25.91	30.31	18.82	42.79	24.51	30.89	16.75	13.38	23.5	21.62	26.14	25.24	21.66	24.17	26.19	20.03	24.46	36.84	16.83	43.46	20.75	26.62	24.49	32.65	13.3	23.5	65.72	21.27	32.19	27.88	23.8
Contig41722	0	0.38	0	0.25	0	0.13	1.65	1.2	0.58	0.35	0.3	0.78	0.23	0.09	1.74	0.47	0.97	0.3	0.12	1.34	1.35	0.85	0	1.82	0.14	0.55	0.37	0.33	0.22	2.87	0	0.72	0.68	0.6	0.09	0.65	0.9	1.12	0.36	0.36	1.47	1.23	0.67	1.86	2.22	0.73	0.75	0.35	0.52
Contig36098	5.59	2.78	1.45	1.03	0.89	2.35	25.27	9.37	16.93	45.81	88.47	48.95	16.43	28.97	31.97	25.17	14.12	70.93	100.34	50.27	2.59	16.24	38.51	38.17	14.23	13.95	7.73	12.72	31.37	13.64	75.85	31.75	31.89	73.31	15.43	0.89	19.05	19.61	21.45	974.64	50.4	19.39	4.52	2.37	13.34	25.4	2.9	269.99	219.18
Contig9016	4	4.09	3.84	2.43	4.52	3.77	6.37	9.22	12.9	5.5	5.16	7.21	6.46	5.51	12.49	5.11	6.73	3.09	6.81	5.08	6.39	4.91	4.8	7.34	6.49	6.21	9.82	5.96	3.6	5.38	6.18	6.23	6.5	5.69	7.42	7.68	5.5	10.44	7.48	4.8	7.06	5.94	6.23	9.59	6.83	6.12	6.73	5.56	6.91
Contig13102	0.38	0.3	0.96	0.53	0.56	0.55	7.51	2.62	3.18	3.86	3.83	3.79	9.44	10.76	1.62	2.1	2.08	8.46	1.95	6.73	2.86	3.36	4.02	3.19	1.79	1.11	1.62	1.21	1.8	0.81	1.32	3.48	3.8	2.19	4.89	5.65	0.44	7.38	5.11	1.5	2.57	7.08	2.39	3.42	3.87	3.51	3.8	2.29	2.4
W6b14187|c0_g1_i1	2.05	0.94	1.51	0.72	1.15	1.27	2.9	2.18	4.14	2.08	1.71	2.35	1.65	1.68	1.95	1.39	5.48	2.63	1.84	1.91	1.45	1.4	1.61	3.03	0.9	1.7	3.63	2.11	1.4	2.18	2.2	2.11	1.11	2.73	1.62	1.52	1.4	1.47	2.13	14.88	1.84	2.56	1.76	1.78	1.52	1.79	2.63	1.99	4.89
W7b4462|c0_g1_i2	0.42	0.92	0.27	0.37	2.96	0.99	5.83	20.38	12.07	8.87	43.92	16.82	15.97	6.99	10.99	5.8	3.8	1.86	17.64	9.86	5.64	9.66	4.05	6.7	3.22	4.92	14.73	11.04	6.46	17.41	15.75	9.08	2.9	8.78	13.87	10.51	11.13	20.35	14.31	33.34	27.46	1.19	7.16	5.6	19.42	11.41	35.03	28.32	32.44
W7b19936|c0_g1_i1	10.06	4.77	4.7	2.8	8.92	6.25	34.08	27.88	14.39	34.11	30.63	26.19	14.84	28.39	18.93	11.62	18.17	22.02	36.62	19.06	24.62	11.73	9.93	13.76	24.9	28.21	25.21	13.68	15.94	19.13	16.1	19.62	16.83	18.91	19.05	21.46	26.35	25.92	18.11	23.74	14.98	32.1	27.11	34.89	42.51	20	21.46	18.82	21.6
W6b17586|c0_g3_i1	1.63	0	0	0.28	0.85	0.55	0.16	1.61	0.16	3.05	5.45	1.97	4.95	2.62	0.15	0.16	0.65	2.02	0.79	4.5	0.94	0.54	0.16	1.34	0.35	1.08	0.95	5.26	1.09	1	2.52	1.63	1.15	1	1.42	0.27	0.22	0.29	0.4	18.77	1.42	0.46	0	0.2	1.87	1.95	0	1.65	1.73
W4a10792|c0_g1_i1	10.86	7.94	5.82	6.5	9.07	8.04	13.67	16.55	8.39	15.78	11.79	12.88	15.64	10.84	10.28	10.04	9.94	18.69	11.4	11.26	12.94	13.47	6.2	13.07	22.41	7.7	15.04	10.57	6.86	13.98	11.37	12.19	11.57	15.86	16.3	12.09	10.67	10	6.93	12.6	9.44	9.1	11.94	10.61	7.52	12.71	10.56	16.52	14.76
Contig25169	0.17	0.26	0.45	0.28	0.17	0.27	1.44	0.65	1.2	0.82	0.54	0.95	1.12	0.93	0.62	1.62	0.64	1.48	0.81	1.6	0.83	0.68	0.56	1.02	1.06	0.21	0.46	1.18	1.05	0.53	0.49	0.89	1.73	0.36	0.79	1.05	0.4	0.64	0.61	0.91	0.62	0.91	1.2	0.42	0.39	0.89	0.93	0.63	1.27
W2b8228|c0_g1_i1	9.6	10.87	7.9	7.33	8.07	8.75	13.22	27.34	24.16	27.55	29.89	22.92	17.46	18.16	32.33	27.22	32.38	17.59	21.05	14.96	16.09	8.93	19.95	11.76	17.73	21.04	34.09	23.59	21.33	11.13	20.39	20.38	16.08	27.2	11.93	24.13	11.6	14.05	16.87	26.9	14.27	18.65	21.17	17.38	20.18	14.24	10.38	19.6	17.41
Contig43600	3.78	5.1	4.12	2.71	3.85	3.91	9.03	8.3	9.37	9.68	8.9	8.58	8.14	7.36	9.51	7.58	13.12	8.54	6.61	7.26	7.75	6.56	8.29	9.5	6.58	6.9	9.34	5.29	4.8	5.74	7.73	7.72	6.51	7.35	7.07	8.46	6.55	6.79	5.54	6.63	5.84	7.03	7.5	8.52	9.46	7.33	8.44	8.07	9.96
Contig11509	0.12	0.48	0.21	0.22	0.11	0.23	6.78	3.07	0.31	6.21	9.23	4.67	3.24	3.55	4.95	1.31	22.85	11.82	1.66	3.36	2.65	0.34	3.35	8.6	1.35	3.01	2.22	1.79	3.29	0.76	0.96	4.27	1.85	1.78	2.23	2.23	1.82	0.83	3.93	5.28	1.82	1.4	1.2	1.2	5.25	1.58	5.85	1.97	0.95
W3d5242|c0_g1_i1	1.61	1.36	0.34	0.52	0.82	0.93	2.01	2.69	0.73	1.61	3.07	1.99	1.35	2.74	0.66	2.57	2.67	0.21	1.38	1.23	2.57	0.81	8.51	2.43	2.37	1.9	0.71	1.59	1.19	0.61	2.72	2.01	1.05	3.01	1.1	1.34	0.71	1.84	2.65	0.54	1.16	2.81	0.74	3.53	2.51	2.8	1.03	1.59	1.71
W5c25473|c1_g1_i2	0	0.24	0.07	0	0.11	0.08	3.22	0.94	2.78	1.41	3.57	2.11	0.89	2.21	0.84	1.76	3.17	2.52	1.43	1.87	1.6	6.58	0.84	1.38	0.06	0.39	1.97	1.17	0.7	1.04	1.84	1.7	3.34	0.92	0.79	1.7	0.27	0.51	0.61	0.3	1.15	1.09	1.4	0.98	0.34	1.1	0.42	2.2	1.24
W5c26851|c0_g1_i1	0.5	0.14	0.55	1.42	1.43	0.81	3.36	5.58	1.13	1.4	3.13	2.64	3	2.23	2.75	3.5	1.07	5.68	2.95	7.72	3.51	1.02	3.64	2.51	2.38	3.05	2.48	1.27	0.9	0.44	1.89	2.74	7.49	4.17	0.69	3.75	0.67	1.4	1.95	1.37	0.7	3.11	2.47	3.43	1.71	1.28	2.85	3.59	3.03
Contig40755	0.51	0.65	0.29	0.44	0.44	0.46	1.09	0.28	1.25	0.45	4.92	1.79	1.18	2.32	1.8	0.32	1.43	0.17	0.51	2.03	4.75	0.37	0.99	1.87	0.97	3.35	2.19	1	1.56	0.77	2.04	1.56	0.59	1.89	0.24	1.75	1.01	3.29	0.94	0.62	1.46	0.83	0.46	2.52	2.19	0.13	0.97	2.31	2.68
Contig30905	1.21	0	0.1	0.42	1.05	0.56	23	1.68	27.79	32.06	32.82	21.72	3.74	130.67	39.19	31.55	0.24	115.77	24.73	35.55	3.75	9.26	8.73	6.34	2.61	11.98	21.16	10.92	5.28	3.32	200.93	35.04	10.36	53.97	31.42	0.2	14.89	5.68	8.06	495.45	1.96	0	2.16	3.76	2.38	11.71	11.15	94.83	508.09
W2b31140|c0_g1_i6	3.13	0.1	1.65	1.14	0.97	1.4	0.61	1	8.4	3.24	0.42	2.4	2.35	1.44	0.63	0.1	0.1	1.04	2.45	0.58	2.89	1.55	0	2.01	1.46	7.17	3.22	1.88	4.88	3.3	0.89	2	3	2.79	6.56	0.67	2.01	0.72	2.63	1.26	0.88	0.28	1.81	2.91	1.05	0.91	7.14	1.25	0.33
Contig33480	0.75	1.84	1.54	0.94	0.36	1.08	1.27	2.97	15.55	5.55	8.53	8.25	10.05	5.55	6	11.06	13.17	2.42	8.29	8.44	3.73	7.5	1.42	2.36	4.88	2.61	4.64	3.67	5.55	11.04	4.35	6.14	3.18	3.01	4.3	4.79	7.43	4.24	5.31	5.83	2.79	2.67	1.96	3.45	4.16	9.15	7.96	8.48	11.74
W4a30405|c0_g1_i1	0.21	0	0.18	0	0	0.08	0.74	0.78	1.36	0	0.33	0.57	0.41	0.19	0.19	0.71	1.26	0	0	0.49	0.87	0.46	0.31	0	1.6	0	0.41	1.16	0.55	1.83	0.23	0.56	0.66	0	0	0.97	0.28	0.38	1.05	0	0	0.59	0.87	0.25	0.44	0	0.68	0.59	0.77
W1a17122|c0_g2_i2	0.12	0.08	0.22	0.13	0.05	0.12	3.94	1.33	0.77	2.5	1.54	2.17	1.91	2.69	1.71	4.42	2.11	4.27	0.74	3.16	2.61	6.4	1.31	1.09	0.44	0.85	1.26	1.47	0.75	1.39	1.44	2.11	1.38	0.86	1.29	2.44	0.92	0.98	1.26	0.92	1.01	1.18	2	1.67	0.54	2.34	1.19	1.74	1.68
Contig38581	0.52	0.86	0.99	1.31	0.36	0.81	8.81	3.26	3.3	4.22	2.56	4.11	3.16	2.6	3.31	6	3.07	6.08	2.72	3.47	2.78	2.98	2.3	4.09	1.73	2.77	3.78	3.98	2.87	1.22	2.76	3.25	2.98	2.83	2.28	2.35	2.63	1.21	2.07	3.38	1.3	5.56	2.73	4.63	3.96	5.77	2.48	4.02	3.44
Contig26554	2.32	1.91	1.99	1.93	1.35	1.9	2.23	2.26	3.74	11.39	9.14	7.49	6	6.2	6.91	5.11	2.23	1.51	9.39	12.92	3.24	9.72	10.51	3.22	5.21	6.43	4.23	4.58	5.04	5.08	4.82	5.91	3.49	2.81	5.66	5.94	1.6	7.71	9.36	4.56	3.17	4.34	1.42	3.2	5.19	5.91	7.62	8.84	5.58
Contig23020	0.4	0	0	0.69	0	0.22	0	0.49	0.6	0.71	0	0.37	0.31	1.07	1.25	0.19	0	0.21	0	0.23	0.82	0.44	0.2	1.17	0.29	0.38	0	0.51	0	0	0	0.37	1.88	0	0.39	0	0.53	0.36	0.5	0.3	0.43	0	0	0.48	0	0	0.52	0.34	0.27
Contig8670	0.3	0.26	0.39	0.16	0.24	0.27	1.28	0.78	1.36	1.49	1.3	1.19	2.98	0.87	1.9	0.64	0.97	2.86	0.7	2.1	0.65	0.6	1.04	0.75	0.79	0.63	1.85	0.95	0.84	0.9	0.54	1.19	0.45	0.78	0.65	1.45	0.36	0.78	0.94	3.14	0.82	0.73	0.5	0.26	0.19	0.77	3.05	0.99	1.94
W3d6537|c0_g1_i2	0	0	0	0	0	0	1.05	0.75	0	0.12	1.64	0.69	0	0.35	0	0	0	0	0	0.9	2.58	0	11.44	0	0	0.12	0	1.45	0	0	0	0.89	0.82	0	0	0	0.7	0	0.32	0	0	0.18	0.72	1.57	0	2.36	0	0.81	3.44
W1a21689|c0_g1_i1	0	0.38	0.5	0	0	0.18	1.17	0.64	10.04	0.69	0.81	2.57	0.76	1.74	0	2.25	2.14	1.21	0.47	1.57	0.64	0	0.76	0.68	0.56	0.74	4.9	0.99	1.45	0.4	1.29	1.19	1.37	0.2	0.38	0.33	3.89	1.39	1.45	1.01	1.06	0.55	0	4.21	0.41	0.58	3.01	1.31	1.23
W3d24682|c0_g1_i2	2.99	3.5	2.17	2.51	2.69	2.77	10.03	5.79	12.19	6.3	7.71	7.63	3.97	6.08	8.33	7.62	7.33	7.91	3.48	6.87	6.89	3.77	10.59	6.49	3.36	4.31	7.25	2.09	5.26	3.47	3.91	5.74	6.87	4.62	8.79	4.1	5.22	4.43	6.91	4.52	4.66	6.03	3.87	5.46	5.61	7.64	12.51	6.45	8.85
W2b27367|c0_g1_i1	0	0.2	0.62	0.18	0	0.2	37.58	0.34	6.63	0	3.01	7.93	0	1.38	15.56	1.09	0.21	0	2	0.12	16.96	2.26	0.2	0	0.07	0	0.2	25.39	0	0.53	14.74	4.25	0	2.63	0.6	0	0.55	36.26	36.61	0	0	0.29	0	0	0	26.19	4.24	0.06	0.1
W7b1673|c0_g1_i2	0.48	0.33	0.65	0.24	0.6	0.46	1.94	2.44	1.44	1.97	1.01	1.61	1.07	0.62	0.8	1.73	1.86	0.78	0.25	1.51	2.49	0.84	1.76	1.94	0.8	1.77	0.73	1	0.82	1.55	0.61	1.21	0.22	0.92	1.07	1.38	0.28	0.55	1.29	2.29	1.42	2.13	0.86	0.91	3.67	1.35	2.58	1.14	1.88
W2b21649|c0_g1_i2	1.16	0.52	0.45	0.6	0.96	0.74	1.85	1.93	1.15	2.52	0.97	1.72	1.51	1.84	3.07	0.87	0.94	2.05	1.19	1.57	1.34	1	0.85	1.51	1.97	1.35	1.64	0.88	0.56	0.71	1.44	1.38	1.24	2.31	1.68	1.17	0.92	1.11	0.88	0.74	1.44	2.22	1.41	2.11	0.74	2.22	0.92	1.16	1.06
Contig18189	0.28	1.21	2.05	0.46	1.13	1.03	5.14	2.03	0.92	4.51	8.04	3.9	2.27	2.28	2.57	3.46	3.8	0.88	3.59	2.23	3.19	3.61	1.23	1.61	4.33	4.41	4.3	1.58	0.69	3.97	1.38	2.7	2.03	2.86	2	3.34	4.47	1.95	2.06	0.99	0.83	3.35	2.63	3.4	0.63	3.64	2.19	2.39	2.92
Contig11088	1.21	1.58	0.97	1.04	1.12	1.18	3.03	2.75	2.16	5.51	8.21	4.32	2.96	3.89	12.66	4.67	5.01	5.14	2.46	4.65	2.2	3.51	1.14	4.6	2.33	1.29	2.86	1.58	2.63	2.98	2.7	3.64	2.1	8.32	4.34	3.44	2.74	1.38	2.65	0.86	1.69	2.84	3.92	2.9	2.51	1.46	2.5	3.12	7.29
W5c31008|c0_g1_i3	0	2.01	0.07	0.07	0	0.43	0	0.43	0.51	2.47	0.9	1.07	1.01	0.23	0.15	0.08	4.75	0.09	0.32	0.2	0.21	0.76	0	0.3	2.5	0.33	4.43	0.88	0.97	0.35	1.14	0.98	6.09	0.62	0.17	1.08	0.58	0	0.64	1.02	0.38	0.73	0	0.83	0.54	1.29	0.67	1.82	3.33
W1a9996|c0_g1_i1	0.28	0	0.12	0	0.24	0.13	7.57	0.23	4.5	3.19	6.33	9.34	0.21	29.72	9.36	10.18	0.14	33.96	8.53	9.17	1.47	0.76	8.5	0	0	4.7	2.93	1.52	0.31	0.42	12.14	7.05	2.8	14.94	2.27	0	2.56	1.71	0.68	53.6	1.19	0.39	0.38	0.66	1.15	3.5	0.89	16.49	290.98
Contig35542	0.12	0.12	0.5	0.32	0.21	0.25	1.12	1.02	4.33	2.22	1.65	1.99	2.76	2.49	0.98	4.02	1.21	0.75	6.02	1.29	0.67	0.2	0.74	0.46	0.51	1.27	0.5	1.34	1.27	1.49	1.2	1.54	0.69	1.27	0.59	0.33	0.48	0.49	3.95	20.2	0.4	0.51	0.08	1.06	1.71	2.36	1.25	1.26	4.47
Contig35417	0.23	0.45	0.2	0	0.2	0.22	1.98	0.86	0.35	4.36	9.5	3.09	3.26	2.29	1.36	2.91	2.56	12.75	1.56	1.61	0.19	0.77	0.91	0.68	0.84	0.44	1.46	0.49	0.95	0.83	0.51	1.91	0.36	0.72	1.24	0.49	0.93	0.93	1.01	4.38	0.51	0.98	0.64	1.96	2.19	1.74	1.8	4.55	2.28
Contig7009	0.41	0.58	0.61	0.17	0.31	0.42	3.61	1.44	1.74	2.29	1.14	2.6	2.43	1.56	1.42	2.6	0.74	2.23	2.43	1.89	0.9	2.17	0.97	1.12	1.03	2.15	2.09	1.79	1.08	1.31	2.74	1.72	1.43	1.21	1.51	2.26	2.84	1.05	0.85	1.35	0.83	2	1.21	2.5	2.08	1.76	1.9	1.68	3.05
W1a4277|c0_g1_i5	0.83	0.46	0.41	0.15	0.78	0.53	0.24	1.27	1.7	0.53	0.68	1.01	0.64	0.58	0.74	0.74	0.71	0.55	0.36	0.82	0.92	0.91	0.46	0.42	0.51	1.35	2.63	0.25	1.41	1.69	1.24	0.89	0.19	1.03	0.52	1.19	1.26	0.47	0.29	0.87	1.29	2.16	0.25	2.21	0.49	1.69	0.46	2.23	1
Contig43797	1.84	4.07	1.12	0.05	1.24	1.66	67.64	16.8	19.77	15.46	43.55	33.37	21.9	27.99	12.97	42.13	3.13	24.75	15.26	21.7	6.36	6.64	15.09	43.13	6.64	9.15	22.02	15.41	10.79	27.2	27.73	18.95	18.2	83.96	5.75	2.72	13.54	5.64	20.55	195.17	13.81	19.2	3.19	4.48	10	41.04	104.26	101.65	453.48
W4a9142|c0_g1_i10	0.11	0.27	0.22	0.15	0.22	0.19	0.48	0.21	0.42	0.33	0.26	0.31	0.26	0.38	0.2	0.27	0.42	0.12	0.24	0.23	0.25	0.15	0.22	0.26	0.91	0.53	0.22	0.21	0.27	0.17	0.28	0.29	0.09	0.32	0.41	0.35	0.15	0.3	0.28	0.39	0.27	0.16	0.43	0.51	0.26	0.29	0.29	0.22	0.33
Contig26596	1.44	3.52	1.48	1.58	1.88	1.98	7.37	14.17	7.25	41.9	29.14	20.84	8.78	10.67	4.75	14.52	15.76	8.05	12.85	17.1	10.79	16.52	11.96	13.39	15.47	17.42	20.34	13.02	7.33	36.3	11.55	14.03	15.2	9.11	9.75	24.86	8.78	14.09	26.33	7.02	7.53	8.4	11.23	15.98	19.65	16.33	21.31	20.62	20.01
W6b20469|c0_g2_i1	0	1.63	0.86	0.11	0	0.52	0.87	1.69	5.13	0.5	2.28	2.85	0.44	1.78	3.63	1.02	3.36	0.06	0.61	3.01	1.02	0.75	0.92	2.41	0.9	0.53	3.26	3.12	2.92	0.25	3.99	1.79	2.05	1.34	0.61	2.19	0.91	0.33	1.24	28.21	1.02	0	0.52	0.15	1.24	2.99	2.09	6.88	7.91
Contig24389	1.77	0.91	0.81	1.72	1.64	1.37	2.29	2.31	4.65	4.64	3.48	3.28	3.73	3.53	2.52	2.9	3.02	8.17	3.04	2.87	3.25	2.86	4.39	0.98	0.98	0.99	1.01	1.94	1.4	3.19	3.56	2.86	3.83	4.05	4.45	1.91	1.66	2.97	2.07	2.69	2.04	2.19	1.3	8.01	1.85	1.4	6.17	2.98	4.01
W2b4695|c0_g1_i1	0.36	2.59	1.13	0.21	2.91	1.44	61.22	5.43	9.78	66.34	30.14	31.39	4.67	15.07	45.91	13.02	4.21	42.29	13.67	20.44	4.39	4.9	18.65	12.12	3.7	5.86	7.18	16.24	3.01	8.93	51.05	15.54	7.26	21.19	0.98	1.74	8.07	6.51	14.01	268.51	24.52	9.69	2.46	5.64	3.16	21.72	36.67	103.76	389.5
Contig22144	0.71	0.34	0.51	1.94	0.31	0.76	5.24	3.25	1.69	5.56	2.22	3.6	2.7	2.1	5	2.77	2.47	3.59	4.73	2.3	0.72	0.65	1.39	2.14	4.64	2.4	3.02	1.1	2.58	0.84	2.79	2.52	1.2	3.74	2.74	1.28	2.11	0.89	3.07	3.17	1.28	3.64	2.03	0.57	4.3	4.06	4.02	2.78	5.92
W4a9460|c0_g1_i1	1.03	1.31	1.49	0.77	1.07	1.14	2.25	3.75	2.71	4.73	2.36	2.71	1.45	1.13	0.47	1.49	3.51	3.53	1.65	2.33	0.93	1.17	1.37	2.95	7.67	2.32	3.11	1.07	2.6	1.46	1.93	2.22	0.55	2.32	3.71	2.05	1.08	2.05	1.86	2.92	1.59	4.14	3.12	1.41	1.43	2.68	1.91	4.95	2.77
W2b4695|c0_g1_i4	1.26	3.01	0.21	0.26	1.2	1.19	46.38	18.68	17.1	16.23	46.82	30.87	8.06	26.88	44.2	24.27	3.53	48.47	8.01	10.81	4.66	5.86	10.45	26.17	4.38	4.09	18.64	9.04	10.74	9.91	26.67	16.04	4.73	46	3.49	0.6	14.1	5.6	20.12	206.57	25.67	15.14	4.38	3.96	8.12	19.19	43.57	62.73	288.42
W6b25410|c0_g1_i2	1.6	2.47	0.41	0.41	3.62	1.7	4.79	6.3	3.8	3.84	6.5	4.51	7.82	8.54	5.42	1.38	0.96	0.66	0.39	0.55	7.46	1.75	5.01	3.36	7.73	2.27	6.78	1.76	6.17	1.47	11.78	4.28	1.75	2.94	3.87	2.79	5.52	2.98	1.58	12.36	0.87	5.6	6.17	10.74	3.33	9.32	2.47	4.61	2.49
W4a5916|c4_g2_i1	0	0.16	0	0	0	0.03	0.32	0	0	0.43	14.93	2.79	0	0.14	0.15	0.94	0.97	1.34	0	1.12	0	0	0	0.57	60.47	0	1.25	0	0.24	1.99	0	3.64	0	1.5	0.16	8.26	0	1.3	0.8	0.24	0.35	0	0.45	0.2	0.17	0.97	0.21	0	1.19
Contig45210	0.32	0.28	0.45	0.3	0.27	0.32	0.81	1.02	0.74	2.21	2.48	1.61	1.96	0.7	1.12	1.08	1.56	2.24	1.11	2.21	0.52	1.06	1.14	1.22	0.97	0.66	1.09	0.87	0.71	1.41	0.54	1.17	0.99	0.96	1.06	1.86	0.33	1.13	1.29	1.22	0.58	1	1.48	0.55	1.58	1.08	2.43	1.12	2.01
Contig30142	3.11	7.04	1.8	0.49	1.72	2.83	87.49	12.07	20.07	17.39	82.83	51.79	12.76	56.23	23.62	19.56	2.31	29.76	58.45	67.05	5.46	12.72	31.97	30.14	9.14	13.05	19.19	57.22	3.95	21.89	123.42	31.47	5.52	39.58	5.86	4.66	11.93	29.72	42.94	266.4	8.69	25.11	6.08	12.61	3.41	15.71	76.12	165.18	264.8
Contig21649	1.45	0.34	0.46	0.51	0.31	0.61	2.15	7.37	1.78	3.39	3.29	3.47	5.4	1.75	1.81	3.87	1.28	0.51	1.64	6.06	1.78	5.13	0.39	1.91	3.14	2.59	2.3	2.27	2.97	3.41	1.36	2.61	2.81	2.63	1.7	3.42	3.57	1.12	2.05	1.98	1.52	2.98	2.25	2.21	3.11	2.3	2.1	3.92	3.65
W7b29447|c0_g1_i1	12.22	15.37	20.06	11.3	22.76	16.34	27.42	30.72	25.72	24.18	19.95	23.62	16.31	31.93	31.56	15.38	19.9	6.98	29.75	9.48	37.9	13.93	13.48	46.35	51.29	25.69	35.69	28.31	23.43	16.12	39.55	25.95	29.93	26.27	35.72	19.22	17.53	22.88	39.88	18.52	30.84	37.06	33.7	36.3	48.5	46.3	14.4	29.4	26.49
W5c12949|c0_g1_i1	0.23	0.07	0.13	0.19	0.46	0.22	1.05	0.49	0.97	0.2	0.39	0.54	0.47	0.4	0.2	0.65	1.27	0.62	0.36	0.34	0.43	0.25	0.15	0.44	0.54	0.5	0.72	0.83	0.22	0.61	0.83	0.52	2.35	0.38	0.36	0.5	0.8	0.8	0.37	0.22	0.16	0.53	1.04	1.08	0.78	0.11	0.58	0.38	0.67
W2b19115|c0_g1_i1	0	0	0	0	0.15	0.03	0	1.37	0.66	6.69	0	2.13	20.62	0.15	15.22	0	0.33	3.79	0	0.19	1.78	0.55	0.65	0	0	0.63	0.32	5.66	5.34	0.85	0	2.95	0.26	5.3	0	0.14	14.2	1.34	5.58	0.12	0.54	4.22	4.15	0.6	0	0	0	26.59	1.33
W1a22758|c1_g1_i2	0	0.15	0	0	0	0.03	0.47	1.16	0	6.29	4.92	2.28	15.13	1.26	0	2.41	2.19	5.35	0.57	2.89	0	0.86	0	5.88	0.79	1.19	0.61	0.27	1.4	1.44	1.04	2.28	0.61	0	11.27	1.83	2.92	1.82	26.26	1.16	1.19	0	0.65	3.02	0	1.41	2.22	0.84	3.91
W2b21497|c0_g1_i5	2.31	1.38	1.02	0.69	0.28	1.14	1.35	1.11	3.38	1.7	1.91	1.66	1.05	1.84	3.91	1.75	0.79	0.82	1.54	1.1	1.5	1.75	0.7	1.67	1.95	1.05	2.15	1.21	2.19	0.81	1.49	1.54	2.11	2.6	1.23	1.66	2.22	2.61	0.3	1.99	1.46	1.45	1.54	1.24	1.57	1.07	1.64	1.94	1
W5c13443|c0_g1_i4	0.52	0.43	0.42	0.24	0.33	0.39	3.48	2.69	0.51	2.4	1.08	1.75	0.91	2.64	0.15	1.39	1.17	2.21	2.72	1.39	1.84	0.72	2.06	3.39	0.55	0.65	0.47	1.49	0.92	0.56	2.01	1.43	10.06	1.16	0.7	0.83	2.2	1.87	0.21	1.27	2.13	1.5	2.14	1.53	0.65	2.58	1.73	1.08	2.29
W4a7509|c0_g1_i12	0.47	0.46	0.05	0.2	0.52	0.34	0.36	2.68	1.23	0.26	0.37	0.84	1.15	0.69	0.85	0.23	0.12	0.31	0.29	0.2	0.44	0.33	0.23	1.59	3.68	3.14	0.46	0.35	0.18	0.06	1.17	0.81	0	1.21	0.52	1.58	1.73	0.95	0.37	0.87	0.13	0.42	1.31	0.57	0.68	0.62	0.76	1.99	0.71
Contig24355	0.17	0.14	0.34	0.1	0.12	0.17	1.87	1.93	0.87	3.25	1.66	1.71	6.36	7.22	0.63	0.82	0.88	4.62	1.27	1.24	3.23	1.31	1.64	1.43	0.63	0.38	0.82	0.62	1.37	0.35	0.94	1.88	4.81	1.42	3.3	2.93	0.15	2.37	1.72	1.25	3.01	5.21	0.98	1.09	1.8	2.63	2.04	1.85	0.79
W5c17344|c1_g1_i1	0.22	0.19	0.28	0.15	0.06	0.18	0.76	0.77	0.39	1.45	0.54	0.71	1.03	0.42	0.56	0.73	0.93	1.27	0.66	1.02	0.46	0.71	0.55	0.74	0.33	0.41	0.27	0.62	0.31	1.1	0.24	0.65	3.06	0.31	0.88	0.72	0.4	0.4	0.38	1.23	0.49	0.82	0.48	0.49	0.36	0.75	0.92	0.78	0.89
W6b19072|c0_g1_i1	0.14	0	0.25	0	0	0.08	12.93	0	13.1	0	0	4.34	35.06	1.67	0	0	0	0	0.17	0.17	17.54	0	2.53	33.65	0	0.54	0	2.19	0	0	0	4.92	0	0	0	0	0.19	0.51	15.31	44.91	0	0	0	58.67	0	5.38	0	0.04	0.05
W4a11699|c2_g2_i3	0	0.05	0.09	0.19	0	0.07	3.61	0.9	0.76	1.17	0.74	1.29	2.55	3.56	0.24	0.47	0.87	2.65	0.73	2.26	1.39	1.62	0.75	0.51	1.03	0.62	0.32	0.19	0.41	0.39	0.78	1.12	0.81	0.56	1.64	2.37	0	2.33	2.37	0.12	1.3	2.38	1.13	1.38	1.59	1.47	1.69	0.97	1.4
Contig29385	2.31	0.14	0.12	0.19	0.13	0.58	1.08	0.83	0.43	1.48	2.63	1.1	0.45	2.25	1.42	0.35	0.29	6.62	0.96	0.66	0.18	0.4	0.85	1.35	0.68	0.14	0.9	1.16	1.02	0.81	1.91	1.18	0	0.81	0.42	0.6	3.93	0.64	1.16	11.64	0.78	0.4	0.3	4.76	0.38	0.54	0.56	0.65	3.78
W1a23237|c0_g2_i4	0.44	0.28	0.71	0.04	2.38	0.77	1.81	0.6	0.19	0.57	2.24	2.03	1.4	0.48	1	0.98	3.17	2.12	2.43	5.05	2.16	2.09	0.57	5.54	1.09	0.65	1.6	0.12	1.05	0.3	1.4	1.75	0.95	1	4.64	2.77	1.1	1.39	1.51	3.24	1.8	0.21	1.15	0.29	0	1.1	4.08	0.29	4.03
Contig4752	0.13	0.39	0.39	0.37	0.35	0.33	3.67	0.81	2.14	0.47	1.92	2.04	7.67	7.95	1.69	2.61	1.99	5.3	1.68	1.22	1.66	5.76	0.94	0.9	0.56	0.58	0.9	1.49	0.1	0.81	0.44	2.33	2.41	2.15	1.76	5.32	0.25	7.74	2.47	0.14	2.05	2.28	1.54	2.94	4.35	1.15	3.49	1.15	1.93
W5c8756|c0_g3_i2	1.08	0	0.5	0	0.09	0.33	1.27	2.25	1.94	5.49	0.2	1.96	3.19	8.72	0.79	0.75	0.68	6.25	1.31	1.24	4.09	1.61	2.01	2.18	0.35	1.2	0.47	0.58	2.11	0	1.83	2.07	4.05	0.4	3.51	5.79	0.26	1.22	4.6	0.5	1.17	5.9	0.27	0.94	1.73	3.07	1.51	1.97	0.75
Contig33226	0.22	0	0.22	0.28	0.03	0.15	2.04	1.05	1.19	2.4	2.32	1.6	7.01	5.03	0.49	0.42	0.73	4.13	0.75	5.77	2.51	1.36	3.96	2.9	0.76	0.83	0.67	0.8	1.3	0.11	0.6	2.11	1.45	0.97	4.7	2	0.24	3.3	3.29	1.1	0.43	4.29	1.21	2.01	1.63	2.56	1.45	1.88	1.09
W5c12114|c3_g1_i1	0	0.38	0.25	0.08	1.2	0.38	14.12	25.56	0	0.61	59.61	16.91	24.23	21.86	0.7	1.88	0.1	0.51	0	3.72	20.01	0.43	31.8	12.86	6.74	18.21	39.4	25.02	29.68	1	0.32	12.55	19.94	35.73	0.19	31.8	2.09	2.09	10.09	0	39.89	21.47	0	17.78	1.53	31.85	1.39	2.09	11.88
W6b23161|c0_g1_i1	13.13	16.09	12.33	10.88	14.53	13.39	29.72	29.66	25.77	35.99	11.78	24.41	19.06	22.91	20.68	25.69	30.94	27.14	25.97	18.83	23.43	18.92	17.57	30.4	16.61	25.02	31.35	24.75	16.14	15.74	15.59	22.46	21.75	24.13	13.23	28.95	23.45	22.36	18.96	64.87	21.21	22.38	22.51	23.93	18.25	29.88	18.63	16.25	29.9
W4a31604|c0_g1_i2	0.46	0.44	0.39	0.26	0.13	0.34	0.76	1.13	1.36	0.81	0.95	0.84	0.59	0.54	0	0.58	0.91	0	1.3	1.4	0.5	0.67	0.45	0.53	3.3	0.72	0.59	0.77	0.11	0.93	1.17	0.79	0.36	1.56	0.74	0.76	0.81	0.68	0.38	0.67	1.32	0.64	1.47	0.55	1.27	0.23	1.18	0.51	0.3
W5c21421|c0_g1_i1	0.4	0.13	0.81	0.35	0.82	0.5	5.75	1.87	3.18	1.67	1.26	2.55	1.87	2.63	3.47	2.57	1.6	2.21	3.09	3.07	1.86	2.5	0.92	2.66	1.55	1.39	1.81	1.47	1.89	1.5	0.74	2.04	2.2	3.01	1.82	2.01	0.89	2.14	3.15	3.26	2.61	1.31	2.4	2.57	1.67	1.4	2.07	2.21	3.55
Contig32390	0.33	0.64	0.19	0.38	0.86	0.48	1.43	0.91	0.44	0.69	1.96	1.08	1.11	1.77	1.08	1.9	0.22	0.34	1.87	1.14	0.63	1.21	1.51	0.39	0.64	2.3	2.13	1.31	1.31	1.35	0.36	1.19	0.78	0.68	0.75	1.84	0.88	0.98	1.09	1.87	1.79	0.15	0.91	0.66	1.03	0.16	1.98	1.36	1.28
W7b24418|c0_g1_i1	1.01	0	0	0.29	0	0.26	0	3.99	1.49	5.37	40.55	8.6	0.91	8.8	3.59	21.52	26.38	0.17	3.05	6.15	1.23	11.59	0.49	0.39	0	20.61	0.16	11.06	0	58.24	0.37	9.2	0	0.51	5.03	6.97	8.01	1.64	8.71	16.78	2.9	8.22	0.46	0	6.1	0	32.51	6.34	108.87
W6b12643|c0_g1_i2	2.72	2.82	2.85	1.63	2.24	2.45	4	4.71	3.52	5.15	3.25	3.94	3.15	6.7	5.17	3.41	3.65	3.87	4.08	4.43	4.25	3.75	3.15	5.44	6.97	4.26	3.29	4.15	3.49	3.48	3.59	4.22	3.28	4.65	5.13	4.65	4.93	4.66	3.06	11.98	3.59	2.57	3.89	8.13	3.91	3.47	3.75	3.13	5.49
Contig27242	0	0	0.27	0	0	0.05	0.84	0.09	0.1	0.19	0.87	0.38	0.16	0	0.65	0.8	0.31	0	0.51	0.72	0.09	0.11	2.25	0	0.6	0.1	0	0.27	0.78	0.32	0.35	0.42	0.82	0.32	0	0.26	0.28	0.84	0.65	1.31	0	0.15	0.14	0	0.22	0.31	0.27	0.12	0.8
W5c8756|c0_g2_i2	0	0	0.14	0	0	0.03	1.08	0.69	0.33	0.45	0.35	0.5	1.49	2.38	0	0.48	0.42	1.55	0.2	1.34	0.48	0.37	0.41	0.2	0.3	0.39	0	0.07	0.19	0	0.92	0.59	2.48	0.94	0.65	1.04	0.22	0.67	0.31	0.18	0.09	1.17	0.12	0.1	0.69	0.75	0.64	0.12	0.33
W1a21199|c0_g1_i1	3.71	0.16	0	2.34	0.29	1.3	0.17	9.15	41.42	17.57	53.54	21.56	4.59	16.69	12.36	72.19	76.38	3.65	33.61	8.72	3.87	71.9	4.3	5.33	0	55.44	2.12	32.44	0	205.15	6.32	32.37	0	4.31	52.18	16.02	38.56	6.75	41.16	66.5	4.94	19.64	0.7	0.81	8.96	0	163.59	10.22	467.57
Contig22146	0	2.14	0	1.02	1.59	0.95	42.24	85.01	0.65	3.95	4.77	31.76	12.05	59.76	3.96	23.4	37.46	1.08	11.09	18.72	33.12	28.94	0.13	6.87	32.62	1.61	4.66	69.4	44.41	47.91	28.58	24.51	10.4	14.54	19.73	9.45	11.96	39.07	9.05	10.09	11.45	9.52	43.01	12.99	0.68	11.51	28.52	24.76	1.95
W3d15649|c0_g1_i1	0	0	0	0	0	0	0.31	0	4.67	1.12	0.82	1.15	4.15	0.42	0	0	0.16	0	1.72	0.36	1.42	1.38	5.23	0.92	0	1.34	0	1.33	0.7	1.76	0.17	1.11	0.25	0.64	0	5.5	0.42	0.28	0.19	0.35	0.68	0.44	0.22	0.19	0.33	0.94	2.83	2.29	0.05
Contig14109	2.93	0.14	0	0	1.13	0.84	2.45	2.84	3.71	7.48	1.8	4.56	4.14	3.25	6.31	5.76	12.98	0.25	4.2	1.6	3.58	0	3.48	6.41	3.47	4	5.52	7.12	3.21	3.43	9.31	4.63	5.29	5.55	3.21	5.44	2.49	2.39	4.76	4.25	2.03	3.37	3.25	3.11	3.3	2.3	3.21	5.3	5.91
W5c18672|c0_g1_i1	0.28	0.53	0.83	1.31	0.72	0.73	3.58	1.36	0.27	2.58	0.86	1.76	2.57	1.96	2.59	0.53	1.1	2.42	3.68	0.47	1.81	1.06	1.08	0.81	0.8	2.09	3.19	1.87	2.97	1.27	1.97	1.8	3.23	0.99	0.53	1.03	1.83	0.37	1.02	2.54	1.05	2.32	0.76	1.98	0.86	2.47	2.3	1.08	2.19
Contig4749	0.8	0.19	0.43	0.43	0.74	0.52	0.25	0.49	11.91	27.63	0.63	7.84	1.48	2.86	4.39	3.32	3.85	1.29	2.86	10.25	17.12	0.66	2.11	6.04	2.61	3.23	23.72	3.53	0.97	7.98	4.25	5.4	4.11	1.28	1.07	16.88	1.53	2.36	10.74	0.26	2.45	0.49	4.77	1.99	2.4	13.42	1.29	0.31	1.71
W2b13401|c1_g1_i1	1.72	1.67	5.02	2.32	1.84	2.51	8.61	5.51	9.95	22.58	12.09	12.2	11.22	16.46	44.3	22.59	17.47	21.91	10.58	18.13	9.95	11.67	5.53	6.83	6.29	5.44	21.8	10.78	5.83	15.62	7.9	14.23	11	4.21	7.24	10.84	7.38	7.83	14.1	28.56	6.95	5.1	3.7	6.2	3.59	10.74	12.8	11.78	14.41
W4a15002|c0_g1_i4	41.63	43.92	32.03	34.04	45.14	39.35	49.89	50.38	55.16	60.19	56.74	53.23	61.34	54.33	49.34	47.18	98.36	52.7	45.9	46.13	47.08	50.63	50.61	45.42	52.65	52.72	58.56	56.36	43.11	61.25	62.85	54.55	46.09	43.78	52.26	53.3	45.07	48.26	55.89	68.44	45.59	50.94	43.27	35.11	48.18	38.05	44.94	61.81	61.54
W4a7312|c0_g1_i2	1.76	2.44	1.79	0.66	2.39	1.81	4.6	23.71	22.48	12.01	28.62	19.16	19.84	11.83	15.39	57.98	20.67	2.15	37.03	17	7.19	17.35	13.96	38.76	16.49	17.24	15.35	23.23	11.9	18.91	16.18	19.92	9.6	11.56	8.08	22.75	23.17	2.53	113.95	21.98	10.58	6.62	7.72	3.42	12.56	19.19	94.78	24.07	20.04
W4a12828|c0_g2_i1	0	0	0.09	0	0	0.02	0	0.25	3.7	6.92	0.11	1.85	7.37	0.54	0.18	0	0	0	0.98	0.93	5.87	0.22	0	1.42	31.59	2.2	0.19	8.04	0.08	1.96	0	3.24	0.16	4.44	11.75	0	0.4	0.18	17.25	0	0	0	0	0.36	0	0	0	9.43	0.07
W3d3640|c0_g1_i2	1.63	0.96	1.62	0.83	1.11	1.23	2.3	1.28	4.61	1.82	1.43	2.23	1.44	2.7	1.88	1.35	2.64	2.43	2.75	1.98	1.75	1.93	5.03	2.84	2.28	2.87	3.42	1.78	1.64	2.18	1.72	2.35	1.3	3.33	2.47	2.34	0.85	4.2	1.42	3.62	2.94	1.79	1.14	3.45	2.16	1.43	2.3	2.84	1.62
W3d13686|c0_g1_i6	0.48	1.16	0.47	0.42	2.49	1	0.76	10.03	1.5	6.74	5.78	5.15	12.34	4.23	3.96	1.85	4.63	1.84	9.69	7.42	6.14	1.93	12.97	3.7	5.05	9.15	10.62	9.24	4.65	6.1	8.78	6.54	6.34	3.73	4.57	3.47	2.42	3.12	8.82	8.06	6.23	2.27	1.9	1.9	4.51	4.84	7.34	13.54	5.26
Contig44583	1.78	0	1.15	0.39	0.84	0.83	1.19	2.07	7.85	2.97	3.25	5.38	4.2	17.05	7.69	3.7	8.13	1.99	5.49	16.6	12.08	2.77	1.6	3.99	3.11	6.39	3.29	4.59	4.68	10.89	0.08	6.23	11.18	2.73	5.82	3.77	3.94	3.1	7.44	0.98	3.46	8.22	1.53	0.27	16.06	1	10.39	9.02	0.89
Contig8421	3.99	1.39	2.01	10.64	4.5	4.51	49.83	19.94	3.95	30.79	16.88	22.78	41.23	32.01	80.07	34.1	6.31	23.81	30.57	35.98	18.47	12.51	18.08	28.27	9.42	12.35	71.44	22.76	19.18	9.93	31.46	28.31	8.57	3.1	6.76	37.1	29.34	48.14	36.24	41.63	19.44	6.87	6.02	25.16	10.03	24.11	50.09	21.97	21.19
Contig21329	5.49	5.43	4.5	5.7	5.71	5.36	25.45	104.08	398.05	59.16	121.04	122.04	154.1	183.81	121.62	190.25	115.15	40.23	188.95	233.24	107.54	246.28	142.28	76.82	54.82	81.19	196.23	112.04	195.63	244.33	81.97	145.6	120.01	52.98	110.57	89	84.21	64.32	64.85	146.41	46.02	50.14	28.23	43.68	111.29	68.77	71.34	118.57	118.83
Contig12548	9.99	8.81	7.23	9.3	11.88	9.44	92.59	249.73	1786.43	205.46	327.21	476.73	1517.19	929.33	394.12	582.17	316.28	264.11	665.59	1037.79	742.98	677.89	1153.4	412.3	345.08	348.02	566.71	558.45	605.53	727.08	212.49	634.55	407.35	135.11	585.55	361.05	303.62	225.31	250.75	662.15	122.95	137.09	99.82	136.66	523.89	234.38	364.76	543.51	311.74
Contig18523	0.52	0.5	0.36	0	0.45	0.36	0.93	0.93	0.2	1.38	2.37	0.99	1.12	0	0.46	1.98	1.03	1.39	1.26	0.24	0.76	0.23	0	0.48	3.36	0.69	0.9	0.26	1.31	2.21	0.91	0.98	0	1.69	0.5	0.6	1.92	3.4	1.79	0.69	0.78	0.14	0.14	0.37	0.11	0	0.27	1.94	0.31
Contig31199	8.19	6.94	2.04	0.48	1.13	3.76	6.92	9.63	25.91	20.93	85.18	38.46	28.23	23.24	103.85	20.38	18.46	46.26	86.36	60.46	3.55	6.57	37.42	105.07	9.48	17.4	12.67	26.89	24.81	18.63	163.88	42.82	34.24	51.08	19.64	1.43	19.25	6.97	36.27	580.48	66.38	13.65	9.7	3.28	3.83	8.37	2.79	89.55	391.6
Contig39087	1.11	0.66	0.44	1.18	1.41	0.96	17.52	5.18	4.13	9.62	10.57	8.66	10.58	10.17	4.49	12.33	9.42	2.72	13.13	15.34	13.24	1.96	14.59	9.86	8.18	2.58	5.83	10.74	12.34	8.51	9.65	9.25	7.18	6.97	2.72	8.58	12.44	9.61	9.8	11.04	5.72	6.69	1.88	4.09	14	10.31	16.53	7.49	13.55
W1a11001|c0_g1_i1	1	0.6	0.73	0.73	0.67	0.75	0.54	1.46	0.08	1.58	2.81	1.58	1.79	2.54	1.44	1.48	1.38	0.32	1.5	5.04	0.25	1.44	1.06	0.9	0.89	0.66	0.74	1.3	1.55	1.88	1.61	1.46	0.84	1.18	0.6	1.41	0.41	1.64	2.19	1.02	0.75	1.08	1.17	0.74	1.2	1.04	0.89	1.64	1.53
W3d4517|c0_g1_i1	5.77	6.23	5.69	4.44	8.22	6.07	23.08	15.39	25.3	15.24	7.98	18.76	17.18	25.48	19.34	15.99	12.92	27.36	13.35	18.65	15.02	16.3	23.08	15.62	14.22	15.53	19.74	18.39	16.83	10.01	13.12	17.27	16.02	14.37	20.55	18.32	12.59	24.43	22.24	13.43	13.75	19	18.38	18.54	15.38	14.95	21.5	17.74	22.66
Contig19197	6.22	1.76	2.41	1	1.07	2.49	19.3	18.64	23.03	27.77	25.85	23.55	26	15.79	34.14	24.13	52.45	12.34	19.66	39.49	13.12	31	21.82	16.67	13.14	17.01	24.31	19.48	19.52	27.29	23.18	23.71	23.94	16.34	13.12	24.7	18.15	16.81	28.57	20.89	15.37	17.68	14.07	14.62	7.14	24.84	42.78	12.78	35.83
Contig19196	2.76	0.82	2.07	1.67	1.06	1.68	11.94	11.71	11.9	19.12	18.3	15.39	15.75	10.15	26.58	14.64	30.64	7.87	13.64	21.65	13.64	20.48	14.76	13.23	18.47	13.39	15.42	14.36	19.63	24.94	20.32	17.35	16.5	12.57	11.48	14.34	14.43	14.08	29.72	13.02	12	12.71	9.06	9.03	10.53	17.35	26.36	11.88	27.37
Contig29586	0	0.25	0	0.55	0	0.16	1.91	0.84	0.25	4.42	6.51	4.9	5.73	4.65	2.73	4.51	4.44	0.92	4.79	12.7	4.9	0.56	3.99	2.38	1.65	0.72	5.4	3.34	2.17	5.71	3.36	3.93	7.65	2.34	1.36	1.91	3.55	1.58	3.31	2.44	4.14	1.96	1.23	1.68	2.25	6.85	4.74	2.99	1.98
Contig32473	0.53	0.51	1.2	0.15	0.56	0.59	8.99	3.99	4.34	4.37	9.15	5.4	9.84	7.76	3.97	8.01	9.85	2.95	5.11	9.19	3.68	5.71	3.78	6.9	10.39	4.48	2.42	3.17	3.3	5.01	2.7	5.7	2.92	3.77	3.85	3.46	4.81	5.56	4.78	5.42	4.24	3.28	2.5	5.96	5.05	5.68	8.11	3.5	4.88
W6b7316|c0_g1_i1	0.45	0.18	0.31	0.47	0.08	0.3	0.27	0.6	0.45	0.49	0.28	0.46	0.21	0.89	0.08	0.61	0.82	0.66	0.11	0.52	0.45	0.1	1.07	0.43	0.53	0.17	0.35	0.23	0.61	0.46	0.7	0.47	0.14	0.37	0.44	0.76	0.48	0.32	0.45	0.54	0.89	0	0.88	0	0.09	0.14	1.05	0.81	0.66
Contig17107	1.39	1.06	1.11	0.42	1.04	1	4.48	1.11	2.2	1.98	1.92	2.17	2.98	2.9	1.64	1.79	1.67	1.96	2.7	2.11	1.29	1.66	1.52	0.79	4.52	2.84	2.05	2.43	1.97	1.68	1.74	2.12	2.09	2.97	2.31	2.04	2.01	2.61	2.95	1.85	1.78	1.99	2.54	1.9	1.68	2.75	2.61	2.16	2.56
W5c16719|c0_g1_i4	0	0	0.13	0	1.04	0.23	8.5	0.98	8.28	21.26	6.7	7.94	1.74	68.39	14.27	25.06	0.15	59.73	12.87	23.31	0.61	4.43	3.8	0.35	1.62	7.07	6.05	19.48	0.55	0.91	84.64	17.63	24.97	40.78	24.46	0	8.33	3.98	8.87	276.86	1.29	0	1.24	2.87	0.47	3.8	2.5	22.85	247.21
W4a21336|c0_g1_i1	0	0	0.34	0	0.17	0.1	0.99	0.81	0.39	0.18	0.41	0.67	0.92	0	1.06	0	2.56	0	0.96	0.23	1.13	1.52	0.97	0.23	2.85	0.19	0	1.34	0.29	0	1.96	0.85	0.15	0.81	0	1.97	1.84	7.37	0.98	0.44	0.43	0	0	0	0.41	0.59	1.52	0.11	0.52
Contig11331	0.06	0	0	0.21	0	0.05	0.49	1.21	0.37	0.44	0.58	0.54	0.53	0.22	0.49	1.3	0.98	0.38	1.64	0.85	0.2	0	0.42	0.29	0	1.11	1.31	0.36	0.18	1.88	0	0.64	0.38	1.26	0.12	0.62	0.16	0.22	0.69	4.26	0.53	0.52	0.51	0.66	0.77	0	1.42	0.29	0.88
W4a25187|c0_g1_i1	0.63	0.83	1.18	1.64	0.97	1.05	2.34	2.29	11.28	3.17	2.6	3.93	5.13	1.95	2.82	3.99	5.26	1.49	4.64	5.28	2.92	3.02	2.51	2.3	7.78	3.06	3.51	3.46	4.74	3.33	2.82	3.68	3.68	3.61	4.21	4.85	2.52	2.44	2.67	2.9	3.74	13.74	6.4	2.18	3.86	8.88	4.87	2.73	6.2
W7b8610|c3_g6_i1	10.78	39.01	46.88	6.45	35.36	27.7	111.46	100.7	16.57	10.2	57.67	50.32	103.96	64.67	8.91	38.05	30.4	31.2	65.71	7.37	42.71	30.09	29.29	55.39	102.38	72.19	58.75	12.23	11.16	21.51	21.2	42.48	26.07	42.56	19.11	31.23	58.64	83.85	9.94	44.67	38.27	8.52	37.95	25.59	119.23	20.23	24.03	45.82	37.36
W2b8912|c0_g1_i1	0.21	0.1	0	0.18	0.18	0.14	0.21	1.04	0.21	0.19	2.85	0.92	2.45	1.12	3.66	0.1	0.31	0.11	0.26	3.5	6.46	0.23	0.72	0.86	0.99	1	0.91	0.89	0.86	0.43	0.35	1.33	0.49	0.97	0.31	0.7	0.84	6.54	0.13	1.08	1.03	0.74	0	1.51	0.11	0.63	0.68	0.68	1.26
W1a14337|c0_g1_i8	0.34	0.47	0.08	0.34	0.13	0.27	0.15	0.73	0.29	0.61	0.15	0.91	0.3	0.13	1.23	1.13	0.24	0.51	0.3	3.38	1.41	0.38	0.19	0.23	0.5	2.46	1.51	0.79	0.84	0.7	0.54	0.88	1.76	0.45	0.9	0.25	1.11	2.27	0.97	0.25	0.48	0.55	0	0.53	0.51	0.07	0.19	1.14	1.48
W2b11039|c0_g1_i3	1.5	2.03	1.39	0.75	0.59	1.25	1.15	1.89	2.98	2.85	1.07	1.76	1.81	1.48	3.32	1.97	4.06	1.1	2.11	1.27	1.39	1.48	0.81	1.11	1.57	1.72	2.56	0.94	1.06	2.46	2.13	1.81	1.11	2.67	1.92	1.61	1.16	2.46	2.16	1.46	1.72	1.83	2.35	2.37	1.19	1.83	1.02	2.16	2.9
W6b10104|c0_g1_i6	0.09	0.11	0.23	0.03	0.03	0.1	0.44	0.61	0.26	0.45	0.59	0.41	0.3	0.4	0.56	0.43	0.56	0.49	0.14	0.34	0.68	0.33	0.75	0.66	0.47	0.48	1.03	0.4	0.59	0.12	0.59	0.49	0.23	0.76	0.4	0.32	0.39	0.34	0.62	1.64	0.19	0.17	0.61	1.03	0.59	1.82	1.1	0.42	0.38
W4a18131|c0_g1_i3	1.17	2.33	1.13	2.09	2.29	1.8	1.24	14.88	11.35	6.43	9.6	7.65	6.8	5.34	6.91	6.37	11.36	17.69	3.55	3.86	4.96	2.49	4.43	16.91	16.41	3.94	14.87	5.81	5.43	3.5	3.29	7.57	2.4	13.52	3.89	2.98	4.95	4.54	31.28	5.65	4.67	6.25	4.13	13.67	4.1	4.04	10.51	6.63	32.1
Contig12614	0.28	6.99	0.81	1.25	1.31	2.13	9.28	14.08	43.61	20.05	28.04	22.95	24.19	19.19	43	71.66	23.79	2.81	57.02	52.3	11.16	80.82	13.29	43.48	40.8	7.48	11.06	34.92	12.78	31.83	20.82	31.71	36.34	32.38	41.09	12	34.15	10.14	28.17	54.92	72.47	19.04	15.5	17.89	40.31	32.11	139.99	54.05	46.61
Contig28844	0	0	0	0	0	0	0	0	0	0.53	0	0.22	0.35	0.13	0	0	0.89	0	0	0.51	0	0.49	0.15	0	0.32	0.42	0.58	0.25	0.55	0	0	0.25	0.23	0	0.72	0.62	0	0	0.37	0.22	0	0	0	0.9	0	0.22	0.77	0.08	0.15
W3d9168|c0_g1_i1	0	0	0	0	0	0	0	0	0	3.28	0	0.55	0	0	0	0	0	0	5.96	0	0	0	4.51	0	0	4.36	0	0	0	0	0	0.78	0	0	15.47	0.13	0	0	0	0	0	0	0	25.23	0	5.74	0	0	0
W2b25313|c0_g1_i4	0.99	0.25	0.58	0.23	0.5	0.51	2.14	1.33	4.44	2.74	1.14	2.34	4.58	1.49	8.81	2.75	5.67	5.22	1.33	3.17	2.14	2.52	0.97	2.01	2.98	1.83	1.66	1.46	2.17	2.08	1.84	2.88	3.79	2.24	1.47	3.78	1.8	1.02	1.36	3.15	2.66	3.07	1.87	1.94	3.37	3.28	1.68	2.82	3.39
W4a7486|c1_g1_i2	0.3	0.27	0.49	0.2	0.28	0.31	0.6	0.76	0.34	1.07	0.37	0.57	0.7	0.45	0.49	0.61	0.64	0.99	0.5	0.41	0.32	0.33	0.52	0.6	1.35	0.91	0.95	0.51	0.35	0.85	0.58	0.63	0.35	0.96	0.62	0.44	0.33	0.67	0.47	0.44	0.71	0.82	0.88	0.97	0.51	0.28	0.36	0.59	0.69
Contig33438	0.65	1.18	6.24	1.23	1.07	2.08	27.82	4.52	5.11	8.55	13.87	14.68	15.32	7.85	22.65	5.75	32.89	18.3	13.17	16.85	7.75	9.02	36.43	27.64	23.52	14.37	28.01	20.64	15.36	12.48	22.36	18.44	8.45	31.3	16.78	8.08	11.09	10.62	6.01	105.25	15.61	9.67	5.48	10.8	10.82	15.81	73.17	50.91	108.22
Contig7754	0.17	0.33	0.15	0.04	0.18	0.17	1.31	0.38	0.8	0.53	0.31	0.61	0.99	0.3	1.74	1.54	0.3	0.39	0.56	0.53	0.9	1.02	0.21	0.15	0.73	0.64	0.37	0.39	0.75	0.86	0.7	0.69	0.53	0.82	0.57	0.46	1.01	0.68	0.37	0.22	0.69	0.59	0.41	0.91	0.22	0.32	0.11	0.36	0.42
Contig10886	8.97	1.02	2.77	1.92	1.1	3.16	7.7	3.52	14.16	11.84	6.52	8.61	10.6	8.8	5.85	17.4	20.14	17.19	7.65	9.19	7.92	11.06	6.95	4.24	12.05	4.53	8.75	4.65	9.21	8.63	8.26	9.64	7.8	8.97	6.3	10.07	5.42	5.46	5.05	13.99	9.06	9.89	8.48	9.37	10.07	8.06	6.35	6.51	16.27
W4a9286|c0_g1_i1	60.87	48.28	41.86	31.73	54.26	47.4	55.48	78.41	128.01	89.42	139.62	92.12	101.85	92.66	92.28	79.4	126.5	102.81	84.52	94.47	70.82	76.14	83.02	71.36	137.77	101.97	103.78	104.85	81.34	89.63	94.16	94.18	83.7	110.58	104.45	74.44	84.99	94.91	90.19	98.16	75.66	73.62	77.32	83.96	89	84.06	122.49	106.24	100.08
W7b19574|c0_g1_i1	0.34	0	0.29	0	0	0.13	0.68	0.28	2.68	14.3	0.35	3.29	0.66	2.11	1.21	0.16	4.22	0.35	0.41	6.6	9	0	2.48	7.52	2.93	3.36	11.59	0.57	0.25	5.52	1.86	3.2	2.38	0.17	0.98	8.74	0.67	2.56	5.45	0.25	1.83	0	5.6	2.44	3.35	10.63	0.87	0.24	1.51
W6b7579|c0_g1_i11	0.27	0.61	0.23	0.08	0.13	0.26	0.48	0.74	0.56	0.77	0.87	0.63	0.49	0.85	0.29	0.8	0.86	0.95	0.65	0.79	0.42	0.72	0.64	0.94	0.63	0.57	1.07	0.63	0.62	0.64	0.72	0.7	0.28	1.16	0.81	0.65	0.52	0.48	0.33	1.94	0.55	0.59	0.87	0.54	0.53	0.89	0.69	0.8	0.8
Contig45661	2.17	0.8	1.13	0.74	0.88	1.14	6.37	8.59	6.79	12.51	10.72	9.05	7.55	6.06	11.68	9.53	16.23	8.17	11.18	17.78	6.44	9.71	11.31	11.27	12.69	8.75	8.85	11.52	12.23	14.02	10.74	10.83	12.91	11.54	7.21	10.99	5.95	11.97	19.66	18.88	13.21	7.7	3.62	5.23	36.24	7.11	17.52	11.87	23.57
W6b25273|c0_g1_i1	0.3	0	0.52	0	0	0.16	1.35	0.37	0.59	2	1.88	1.09	1.16	0.67	0.27	1.15	0.15	0.62	1.09	3.44	2.21	0	2.2	0	2.71	0.71	2.03	2.41	1.34	0.76	0.17	1.22	1.17	2.76	0.87	0.5	1.2	0.8	0.93	3.98	1.95	0	0.83	1.26	0.31	1.35	1.74	0.21	1.69
W5c10714|c0_g1_i1	0.15	0.14	1.38	0.25	0.13	0.41	1.31	0.12	1.3	0.52	0	0.65	0	0.65	0.26	0.56	0.44	0.75	0.35	0.67	0.72	1.28	0.14	1.54	0.84	0.97	1.13	0.12	0	0.3	1.93	0.67	0.91	1.79	0.28	0.73	0	1.04	0.72	0.32	0.79	0.41	1.01	1.75	0.76	0.44	0.56	0.33	0.63
W3d6293|c0_g1_i1	0.52	0.46	0.54	0.33	0.47	0.47	0.9	0.69	1.28	0.89	1.18	0.86	0.44	0.46	1.72	0.69	1.11	0.75	0.66	1.22	1.24	0.47	1.68	1.64	1	0.79	0.92	0.63	0.37	0.42	0.7	0.89	1.1	1.27	0.97	1.47	0.81	1.31	0.53	0.43	0.59	0.79	0.87	0.79	0.99	0.71	0.61	0.58	1.13
W4a31565|c0_g1_i2	0.3	1.46	1.04	0.59	1.25	0.93	2.57	2.17	3.51	2.96	0.63	2.11	2.76	2.69	1.08	1.09	1.58	1.79	1.1	0.78	2.29	1.16	1.18	2.92	4.15	3.29	3.13	1.73	2.86	2.7	2.16	2.13	1.65	3.32	3.37	2.64	2.51	0.54	0.75	2.78	0.74	3.92	2.92	2.36	2.36	2.71	1.84	2.07	2.68
W6b5965|c0_g1_i2	0	0	0.06	0.06	0.18	0.06	0.61	0.44	0.2	3.06	2.04	1.1	2.41	0.66	0.42	0.91	1.55	5.57	1.8	0.7	1.38	0.59	0.2	0.32	0.34	0.38	2.41	0.29	0.6	0.76	0.52	1.15	0.58	0	0.59	0.84	0.45	0.66	1.75	6.66	2.12	0.09	0.19	1.7	0.42	2.32	3.04	2.14	1.52
W2b6249|c0_g1_i2	1.51	1.29	1.14	0.93	1.15	1.2	3.76	4.1	1.93	2.82	3.33	2.98	2.96	2.47	5.98	2.9	6.68	1.51	2.42	2.9	2.58	2.16	3.51	4.16	1.69	2.84	3.28	2.83	2.43	2.57	3.16	3.11	1.87	4.08	2.86	2.17	1.76	2.51	2.83	2.95	2.6	2.74	4.94	4.35	4.34	3.75	5.11	3.6	4.68
W5c23243|c0_g2_i5	0.23	0.41	0.58	0.13	0.29	0.33	0.43	1.06	0.97	0.34	0.37	0.6	1	0.58	0.25	0.31	0.6	0.44	0.67	0.58	0.5	0.89	0.32	0.62	0.76	0.88	0.53	0.62	0.32	0.54	0.47	0.57	1.91	0.9	0.61	0.65	0.54	0.34	0.09	0.26	0.38	1.24	0.94	0.88	0.26	0.45	0.71	0.61	1.31
Contig35434	0.4	0.72	1.07	0.06	0	0.45	0.71	0.33	8.03	1.17	1.79	2.48	1.07	5.37	1.11	2.03	0.27	14.19	1.8	5.68	0.8	0.26	0.69	4.02	0.44	0.76	0.36	0.4	0.7	0.55	15.48	2.95	1.1	4.3	1.63	0.48	1.25	0.78	0.92	182.82	0.91	0.47	0.51	1.29	0.88	0.6	1.56	8.87	35.69
W7b27282|c0_g1_i1	0.24	0.34	1.12	0	0.31	0.4	2.61	0.59	1.53	0.95	3.72	1.65	0.92	1.06	1.27	2.39	1.66	0.61	0.87	1.09	0.88	1.43	0.23	4.17	3.09	0.9	2.52	0.5	0.71	2.79	1.18	1.49	1.21	3.04	1.61	0.69	2.21	1.06	2.06	1.4	4.89	1	1.64	1.57	19.9	0.53	2.29	1.6	3.31
Contig37091	0.85	1.58	0.78	1.64	0.99	1.17	2.36	1.7	2.6	2.34	1.28	1.89	1.72	3.72	1.64	3.92	1.4	2.83	1.45	3.62	1.27	2.4	1.51	0.55	1.41	1.71	1.61	1.16	1.26	1.7	1.67	1.92	0.89	2.57	1.58	1.8	1.63	1.14	3.25	5.87	1.04	1.88	2.46	2.42	1.4	1.31	2.4	2.23	2.98
W4a1521|c0_g1_i2	0.3	0.29	0.13	0.19	0.19	0.22	0.59	0.18	1.76	0.72	0.15	0.76	1.09	0.79	0.46	1.21	0.44	0.38	0.99	0.59	0.67	0.08	0.43	0.26	3.74	0.63	0.86	0.69	0.49	0.15	0.49	0.76	0.58	2.12	1.29	0.86	0.2	0.53	0.82	0.44	0.64	1.45	0.71	0.36	0.69	0.77	0.1	0.77	1.64
W4a17329|c0_g2_i1	0.46	0.51	0.39	0.13	0.73	0.44	1.06	0.69	3.46	1.96	0.32	1.29	0.18	1.02	0.54	0.58	0.83	1.1	1.11	0.79	0.68	1.09	0.45	0.62	4.34	0.94	1.61	1.03	0.45	1.4	0.92	1.04	1.9	1.48	1.33	1.46	0.4	1.62	1.13	0.22	0.99	1.17	2.2	1.82	0.63	1.25	1.76	0.85	1.13
W3d30443|c0_g1_i1	0.81	0.92	1.13	0.38	0.83	0.81	0.51	1.26	6.74	1.82	1.83	2.16	2.16	0.85	2.03	1.12	1.39	0.83	1.07	0.84	1.38	1.53	3.08	2.05	2.17	2.01	3.25	0.62	0.98	0.75	2.82	1.63	0.91	1.27	1.21	2.01	1.17	2.21	1.81	1.83	1.9	5.23	2.22	2.02	1.14	2.41	1.79	2.11	1.89
Contig5252	5.1	7.98	5.57	3.74	7.63	6	14.17	14.75	16.15	12.55	7.31	12.42	10.62	9.4	9.95	8.69	13.04	14.96	8.95	8.52	10.27	11.22	7.32	13.51	13.07	10.78	15.26	12.43	10.23	10.59	12.44	11.12	13.46	16.49	20.35	12.76	9.27	17.55	9.23	13.06	10.39	18.06	15.36	19.78	14.51	12.84	16.24	11.16	17.8
W2b26299|c0_g2_i1	0.39	0.64	0.83	0.39	0.69	0.59	1.93	1.37	2.34	0.89	1.83	1.43	0.89	0.62	3.7	0.7	1.87	1.75	1.58	1.56	2.2	0.46	0.98	3.22	0.94	1.15	1.05	0.56	0.49	0.59	0.93	1.33	0.8	1.36	0.97	1.49	2.13	2.31	0.75	0.45	2.1	0.68	1.63	0.58	0.82	0.45	1.13	1.38	1.6
W4a5396|c0_g1_i2	0.12	0	0	0.2	0.05	0.07	0.81	0.91	0.75	0.41	0.12	0.66	0.18	0.21	0.21	0	0.35	0.6	1.13	0.2	0.43	0.38	0.63	0.27	5.88	1.27	0.73	0.05	2.16	0.12	0.38	0.8	0.18	0.71	0.9	2.13	0.15	0.57	0	0.34	0.82	0.57	1.44	2.23	0.85	0.43	0.82	0.57	0.58
W7b10932|c0_g1_i1	0	0	0	0.15	0	0.03	0	0	0.17	0.3	0	0.08	0	0.15	0.15	0	0.17	0	0	0	0.28	0	0.33	0.2	0	0	0	0	0	0.17	0	0.08	0.27	0	0.33	0	0	0	0	0	0	0	0	0	0.88	0	0	0.24	0.06
W7b8663|c0_g1_i1	0.76	0	0.26	0.2	0.26	0.3	1.96	2.05	1.87	2.22	1.26	1.71	1.7	1.35	1.08	2.25	3.17	0.94	1.65	3.21	1.61	0.58	0.89	1.77	0.71	0.64	5.91	1.09	2.36	0.62	2.33	1.78	0.53	5.26	1.25	1.57	1	2.08	0.66	2.28	2.38	3.29	0.63	2.9	4.33	1.81	1.46	1.93	4.66
W5c20815|c0_g4_i1	6.17	12.85	4.89	1.51	1.93	5.47	1.9	8.97	10.96	15.77	7.43	8.29	3.56	11.56	3.53	17	18.93	2.12	20.18	14.53	3.24	12.34	1.7	8.89	7.66	4.05	2.75	6.3	3.29	21.63	2.09	8.7	7.3	8.09	7.06	6.06	8.2	4.08	3.92	6.06	12.69	2.89	4.8	4.75	2.97	4.5	2.03	3.77	6.77
Contig25605	1.81	0.35	0.19	1.32	2.11	1.16	5.5	5.86	1.36	10.86	8.8	6.85	4.81	4.26	2.17	2.85	4.95	3.73	4.35	14.59	3.41	4.97	4.04	4.62	3.9	3.81	4.82	3.86	5.09	5.58	5.26	4.79	3.25	5.15	7.51	5.34	4.95	4.76	3.41	8.11	5.18	4.42	3.9	5.69	5.5	11.42	6.38	12.45	9.16
Contig26286	0.6	0.9	0.54	0.22	1.02	0.66	1.79	2.84	0.46	3.72	8.27	3.11	5.25	1.46	2.88	1.97	3.65	1.69	2.18	1.58	1.77	1.46	1.88	0.82	1.11	1.53	3.74	3.74	0.66	4.35	1.26	2.26	8.19	1.78	2.17	1.69	1.48	3.07	2.09	1.95	1.52	2.19	1.08	2.15	0.97	3.23	5.01	3.64	3.04
W5c12717|c0_g1_i3	3.5	4.73	4.37	1.94	4.2	3.75	6.61	10.8	10.12	6.97	3.87	7.23	5.55	7.84	6.36	6.4	6.21	6.44	6.39	4.97	4.12	7.24	3.1	5.04	8.72	6.11	5.28	6.52	5.39	7.08	7.19	6.1	12.63	6.15	8.25	7.34	8.43	5.93	3.23	4.33	5.41	6.81	7.49	8.19	5.23	9.14	6.41	6.68	7.01
W6b10104|c0_g1_i10	0.03	0.15	0.24	0.13	0.37	0.18	0.71	0.48	0.12	0.68	0.64	0.47	0.43	0.38	0.77	0.24	0.52	0.66	0.22	0.39	0.43	0.2	0.6	0.5	0.24	0.47	0.71	0.31	0.34	0.31	0.61	0.44	0.19	0.66	0.33	0.41	0.33	0.35	0.65	1.45	0.2	0.26	0.68	0.99	0.51	1.19	0.75	0.41	0.47
W6b6400|c1_g1_i1	0.14	0	0.66	0.24	0.24	0.26	2.87	0.75	1.8	12.9	10.74	5.01	0.82	13.1	1.69	8.59	0	19.05	4	4.34	0.29	2.38	4.04	8.27	0.05	1.59	0.68	0.71	0.57	1.29	50.93	6.44	2.57	19.26	7.26	0	1.21	2.92	1.47	412.1	1.37	0	0	0.84	0.8	4.92	0.72	26.82	45.78
W3d21168|c0_g1_i1	2.23	0.39	2.44	0.53	0	1.12	7.7	39.18	0.8	49.84	315.74	77.1	20.32	13.92	5.62	27.05	19.22	1.67	9.36	25.39	29.07	23.4	25.63	35.61	38.12	37.27	29.76	39.7	23.98	102.65	5.81	27.03	30.92	11.83	39.53	44.96	25.61	14.61	58.53	22.42	33.86	34.72	17.07	59.16	49.43	50.07	48.53	86.67	16.48
W7b23787|c0_g1_i2	12.68	4.95	4.99	4.25	8.35	7.04	15.02	16.94	7.16	12.31	4.35	11.61	10.42	9.47	13.37	11.02	11.72	16.04	6.83	8.64	8.41	9.38	8.1	15.32	8.6	15.33	10.91	9.73	9.24	8.38	9.86	10.57	8.09	10.77	13.56	13.83	10.52	8.49	6.71	14.29	14.09	7.97	7.63	12.67	43.18	24.74	11.25	7.82	13.53
W6b4030|c0_g1_i1	0.34	0	0	0.29	0.3	0.19	1.36	1.53	32.91	0.75	3.19	6.86	3.69	0.45	0.76	2.11	6.93	1.57	0.82	1.17	2.64	1.12	1.33	3.97	5.88	5.94	0.82	5.89	1.64	15.57	2.61	3.42	5.83	1.73	1.48	0.28	1.35	0.9	6.72	9.75	1.29	2.38	2.81	5.7	1.24	1.78	6.11	7.23	11.25
W5c12148|c1_g2_i1	1.63	0.26	1.05	0.12	0	0.61	4.74	30.85	0.54	34.02	213.19	53.62	14.63	13.53	4.12	17.68	14.6	0.98	6.58	17.12	20.2	16.97	15.79	20.46	23.41	24.9	16.22	26.52	14.81	67.88	5.97	18.02	18.22	5.82	24.57	33.42	14.05	9.88	45.48	13.48	23.36	25.66	12.53	41.96	38.95	32.03	35.9	56.91	11.77
W3d28467|c0_g1_i2	0.9	2.39	1.2	1.75	2.35	1.72	3.5	4.35	1.87	3.76	3	3.34	4.08	3.48	4.53	2.5	2.91	3.75	1.69	3.14	3.02	1.87	5.28	4.26	2.04	3.95	2.47	3.39	1.77	1.56	4.05	3.14	2.84	2.76	3.48	2.84	1.79	2.63	2.06	4.2	1.51	5.73	7.74	5.17	2.34	4.36	3.18	2.01	4.76
W6b22491|c0_g1_i1	5.84	4.44	5.49	2.5	5.41	4.74	13.5	12.69	23.44	11.55	8.3	13.14	15.4	12.75	11.8	10.45	16.28	11.09	12.38	12.59	10.03	10.68	8.93	12.09	11.73	10.63	13.02	10.51	9.05	7.35	10.35	11.43	8.5	14.51	12.55	16.46	9.42	11.09	7.97	27.19	7.71	15.12	13.13	11.98	10.95	17.27	8.79	15.66	15.98
W7b28667|c0_g1_i2	2.63	1.19	1.96	1.55	5.43	2.55	3.22	0.9	2.86	2.64	4.26	2.53	1.46	3.49	1.21	2.26	2.01	3.46	2.39	2.61	1.92	4.46	2.02	0.84	0.38	1.31	0.98	1.01	1.66	1.68	1.12	1.91	1.26	1.27	1.73	5.31	1.49	2.19	2.16	4.97	3.01	1.93	2.05	2.35	5.79	2.29	3.26	2.12	4.25
W4a28146|c0_g1_i2	5.28	5.03	3.93	3.15	4.64	4.4	3.52	7.34	12.54	3.57	2.85	5.32	3.22	4.53	2.77	3	2.88	3.58	3.03	1.66	2.81	3.13	2.1	6.93	12.42	4.15	2.72	1.6	3.45	2.47	4.98	3.76	2.13	7.02	8.1	3.67	3.01	4.17	2.05	4.43	4.73	7.13	6.4	9.66	5.76	5.13	1.74	4.55	5.93
W6b13673|c0_g1_i1	0	6.01	0.22	0	0	1.25	0	0.21	6.28	0	1.33	1.3	5.42	0	0	0.97	0	0	0.31	0	3.64	1.25	0	0	0	0	0.25	0	0.38	0	0	0.64	0	1.82	0	1.69	0.17	0.23	0	5.71	0.41	0	0	16.61	0	0	0	0.11	0.34
W6b15521|c0_g2_i5	0	6.24	0.21	0.9	2.6	1.99	2.01	0.5	2.77	1.52	0.7	1.83	1.13	0.33	1.2	0.12	0.12	1.19	0.67	0.14	0	2.41	0.3	1.78	0.88	2.54	1.23	0.72	1.36	0.99	0	0.9	0.9	1.93	1.18	0.56	0.24	0.54	1.36	5.47	0.53	1.96	0	2.48	1.84	5.01	0.23	2.03	0.69
W0d24589|c0_g1_i1	0.4	0.39	0.35	4.55	0.53	1.24	0.61	1.5	20.62	0.18	0	3.82	0.31	0	0	0	0.4	0	0	0	0.17	0	0	0.24	0.58	0.19	3.32	1.37	0.15	0	0	0.35	0.16	0	0	1.35	0.27	23.91	0.5	0.6	0	0	0	7.77	1.9	5.44	8.06	0.17	0.47
W0d21935|c0_g1_i2	3.42	12.85	3.06	7.59	4.2	6.23	4.96	6.77	9.16	6.69	6.94	6.45	5.39	7.56	4.39	7.07	7.64	8	5.5	2.49	4.06	4.97	2.31	4.51	4.39	4.52	6.09	3.1	4.08	6.04	5.41	5.13	3.8	8.03	6.54	4.21	5.31	5.61	6.92	4.9	5.12	5.81	5.72	6.94	6.22	8.93	3.72	6.41	6.02
W7b13418|c0_g1_i1	0	0	0.85	0.64	0	0.3	0.5	0	0.74	0.44	0.26	0.39	0.29	0	0.22	0.24	0.12	0	0	0	0	0	0	0	0.36	0	0	0.21	0.18	0.89	0.27	0.15	0.68	0	0.24	0.31	0	0.33	0.61	0.64	0	0	0.34	0.3	1.68	0.37	0.48	0.14	0.66
W4a31156|c0_g1_i1	0.79	1.34	3.57	2.4	4.14	2.45	3.56	5.21	19.21	2.12	0	5.02	2.15	0.53	0.18	0	1.58	0.41	4.09	0.45	1.46	3.48	0.78	5.1	4.58	0.38	5.54	3.69	3.24	2.02	3.49	2.27	0.62	5.47	1.15	9.24	4.47	7.92	0.49	0.29	9.01	13.61	0	2.85	0.21	5.63	6.37	11.55	7.68
W7b29728|c0_g1_i3	0.72	1.83	1.34	1.11	1.31	1.26	2	1.46	2.26	1.14	0.58	1.41	0.86	0.69	0.5	1.44	0.28	0.69	0.68	0.64	0.87	0.67	0.33	2.34	0.48	1.53	2.9	0.85	0.7	0.85	1.22	0.97	0.61	2.45	1.35	0.28	1.4	1.48	1.03	0.29	1.63	1.95	2.92	3.74	4.81	2.5	1.57	2.04	1.38
W7b17704|c0_g1_i1	8.4	7.37	4.77	4.14	4.39	5.81	4.39	4.67	6.65	9.08	9.3	6.3	11.84	5.99	3.58	2.85	5.15	1.2	10.04	4.6	5.5	7.24	0.51	5.59	6.07	4.53	6.36	4.38	4.32	7.77	10.24	5.67	8.88	5.15	8.27	4.95	1.89	4.36	6.56	6.47	4.34	6.16	8.91	10.54	17.89	7.73	3.16	14.16	4.41
W7b16812|c0_g1_i3	1.03	0.22	0.1	0.79	0.1	0.45	0.34	0.75	0.45	0.71	0.36	0.48	1.33	0.1	0.2	0.55	0	0.12	0.56	0	0	0	0.11	0.94	0.08	0.76	0.33	0	0.43	0	1.51	0.37	0.54	0.59	0.44	0.1	0.76	0.41	0.14	0.51	0.99	0.8	0.16	1.37	6.43	0.17	0.44	0.99	0.23
W5c24083|c0_g1_i3	1.07	2.62	2.71	0.6	1.38	1.68	1.32	1.87	1.56	1.8	2.63	1.83	2.25	1.12	0.73	1.51	1.82	2.02	1	0.87	0.72	2.08	0.8	1.48	1.46	1.67	2.01	0.91	0.38	3.93	2.08	1.52	3.6	2.78	1.71	1.21	1.43	0.67	0.86	2	3.01	0.62	3.05	1.82	1.71	4.62	0.32	5.2	3.75
W7b2454|c0_g1_i1	0.82	0.16	1.98	0.57	0.14	0.73	0.33	0	71.82	0.15	0.17	12.08	0	0.29	0	0.47	0	0	0	0	0.13	0.81	0	0.19	0.12	0.16	1.11	0.14	0	0	0.18	0.19	0.13	8.66	1.12	0.41	0	0	0.41	0.73	0	3.57	3.51	10.16	5.73	13.27	3.38	1.75	4.71
W6b23187|c0_g1_i1	3.49	1.55	1.88	0.28	3.91	2.22	3.97	2.35	2.26	3.02	2.72	2.48	2.37	1.18	1.08	2.24	1.41	2.41	1.64	1.22	1.5	0.95	0.88	4.56	0.97	1.51	2.43	1.35	1.71	1.34	0.93	1.67	0.94	1.4	0.78	1.87	2.34	1.58	1.27	10.06	1.97	3.43	3.82	1.88	1.76	1.18	1.43	1.39	3.46
W7b26575|c0_g1_i3	0.39	0.91	0.59	0.36	0.65	0.58	0.74	0.38	0.76	0.66	0.86	0.65	0.71	0.74	0.22	0.5	0.58	0.28	0.37	0.98	0.7	0.39	0.24	0.87	0.36	0.7	0.58	0.21	0.23	0.51	0.42	0.5	0.37	0.48	0.48	0.71	0.26	0.98	0.65	0.59	0.54	0.54	0.95	0.83	1.55	0.91	0.32	0.49	0.69
W6b20727|c0_g1_i1	0.75	1.21	0.86	0.87	2.51	1.24	1.75	3.08	3.47	2.89	1.17	2.1	2.33	2.23	1.34	0.24	0	0.26	0.91	0.29	1.43	0.55	0.61	2.49	2.17	1.3	2.41	0.64	0.93	0.89	0.83	1.15	0.78	3.07	1.45	2.4	1.5	1.89	0.93	1.01	3.12	0.7	1.55	3	3.64	1.68	0.32	0.91	1.37
W5c20883|c0_g1_i2	0.55	1.03	0.57	1.36	0.38	0.78	0.47	3	0.74	0.7	1.19	1.11	0.79	0.42	0.46	0.75	0.67	0.57	1.67	0.41	0.71	0.86	0.38	0.46	0.57	0.41	0.76	0.6	0.32	0.96	0.69	0.66	2.89	0.84	0.53	0.62	0.78	0.8	0.73	1.01	0.72	0.72	0.22	1.04	0.98	0.53	0.35	1.13	1.21
W1a10974|c0_g1_i1	0	0.81	0	0	1.32	0.43	0.34	0.69	2.5	0	0	0.94	0.52	0	0.45	0	0.17	0	0	0	0.41	0.55	0	0	0	0.16	0.16	0	0	0.52	0.56	0.18	0	1.03	0.16	1.12	0	0.3	0	0.25	0	2.6	2.32	0.2	0.88	2.01	1.08	0.14	0.39
W7b28879|c0_g1_i1	0	0	0	0	0	0	2.89	0	0	0	0	0.48	0	0	0	0	0	0	0	0	0	0	0	0	0	0	0	0	0	0	0	0	0	0	0	0	0	0	0	0	0	0	0.17	0	94.75	0	0	0	0
W7b10072|c0_g1_i2	1.24	1.05	1.13	0.54	1.01	0.99	0.85	1.15	2.3	1.52	0.49	1.32	0.72	1.38	1.46	1.79	0.62	1.36	0.85	0.71	0.38	1.19	0.15	0.91	0.95	1.4	1.35	0.39	1.04	1.27	0.77	0.98	0.67	1.74	1.28	0.39	0.41	1.31	0.67	0.63	1.93	1.2	0.86	0.19	2.83	1.62	0.6	1.11	1.26
W7b29002|c0_g1_i1	0	0.14	0	0	0	0.03	3.55	0	0	0	0	0.59	0	0	0	0	0.14	0	0	0	0	0	0	0	0	0	0	0	0	0	0	0.01	0	0.44	0	0	0	0.25	0	0	0	0	0	2.22	5.33	0	0	1.91	0
Contig33490	2.09	0.95	0.37	1.49	2.03	1.38	2.39	3.78	19.92	11.47	54.82	15.7	2.14	2.3	0.05	1.35	4.28	16.7	0.3	0.21	0.15	4.65	1.32	1.01	0.13	0.52	1.36	0.05	0.09	3.76	0.88	2.17	0.34	7.15	2.08	11.5	0.33	1.64	1.52	14.06	1.26	2.75	8.46	5.45	32.64	13.67	1.5	28.26	16.6
Contig39378	0.29	0.09	0	0	0.08	0.09	0	0.24	8.36	0.52	0	1.52	0.08	0	0	0	0	0.2	0.24	0.22	0	0.11	0	0.11	0.14	0.37	0	0.16	0.36	0.2	0.86	0.16	0.08	0.2	0.56	0.08	0	0.17	0.12	0.43	1.05	0.14	0	7.11	18.71	0.44	0.62	0.49	1.67
W7b3581|c0_g1_i2	1.57	1.35	1.05	0.94	1.96	1.38	2.25	2.06	5.76	4.22	0.66	2.51	0.89	1.14	1.05	1.12	2.36	2.29	1.28	1.05	1.75	1.13	0.28	1.54	1.88	2.03	2.56	1.21	1.7	1.16	1.38	1.46	0.69	3.12	1.83	1.31	0.95	1.65	1.17	0.84	1.7	2.2	1.93	1.4	9.36	1.11	2.86	2.43	2.71
W1a13821|c1_g3_i1	0.3	1.5	1.48	0.34	0.23	0.77	0.22	9.32	1.62	11.56	0.99	4.83	4.32	1.04	0.42	0.54	3.79	4.98	0.73	0.15	0.14	0.71	0.08	0.4	2	0.41	2.25	0.29	0.29	0.22	0.9	1.25	0.71	3.88	1.67	0.86	0.52	0.42	0.59	1.88	0.28	1.21	3.93	5.7	1.89	9.42	2.83	7.92	10.16
W5c28101|c0_g1_i4	0.81	2.35	2.26	1.75	4.76	2.39	3.44	2.33	4.81	4.14	5.07	3.65	4.24	2.52	0.36	3.1	0.81	0.63	1.47	2.79	1.16	2	1.58	0.71	2.63	3.64	3.71	2.57	1.5	1.44	1.78	2.03	3.79	2.48	2.94	2.36	4.57	3.42	1.75	2.09	1.97	6.24	7.81	7.52	4.63	3.63	3.38	6.41	5.9
W4a31900|c0_g1_i2	8.06	9.96	8.97	6.25	11.17	8.88	7.14	12.9	13.39	11.47	15.28	11.38	10.12	10.18	7.58	5.91	8.94	10.19	9.11	5.47	8.49	8.93	5.97	7.79	11.59	11.08	12.65	7.36	5.68	8.43	12.42	8.84	6.84	13.69	10.94	10.1	9.31	9.34	9.02	10.69	10.4	11.89	9.09	13.12	15.61	12.78	7.48	17.91	10.31
W1a19410|c0_g1_i1	2.53	5.07	3.93	0.5	3.59	3.13	3.09	2.15	9.41	2.02	1.62	7.1	2.88	1.87	2.51	2.13	3.51	1.89	4.41	1.14	2.56	5.05	0.11	1.21	0.69	8.49	5.94	1.99	3.68	6.61	4.47	3.22	1.49	7.4	4.38	4.96	5.11	3.63	2.17	0.92	1.64	5.45	7.72	6.84	6.05	2.78	6	10.15	3.57
W7b10771|c0_g1_i1	0.35	0.26	0.74	0.14	0.07	0.31	0.19	0.96	3.05	0.21	0.12	0.78	0.27	0.8	0.1	0.11	0.7	0.4	0.24	0.09	0.1	0.34	0.11	1	0.14	0.33	0.19	0	0.26	0.12	0.3	0.3	0.06	0.64	0.15	0.59	0.57	0.45	0.29	0.11	0.68	1.48	0.22	2.72	5.4	0.64	0.4	0.35	0.67
W7b23|c0_g2_i1	1.4	0.68	0.43	0.95	0.35	0.76	0.6	7.98	1.68	5.79	2.19	3.11	0.16	3.21	0.8	0.19	0.2	1.13	0.12	0	1.31	0.44	0	0.47	0.43	1.8	2.12	2.46	0.07	0.51	1.1	0.87	0	2.15	2.33	3.75	1.99	0.44	0.74	0.15	2.06	0.42	4.28	8.77	20.21	11.97	3.99	0.53	1.13
W1a1646|c0_g1_i1	8.31	3.04	5.83	5.08	12.98	7.05	8.1	3.83	20.15	6.94	5.29	10.1	6.92	2.8	9.14	3.98	7.07	2.82	14.88	3.14	2.82	4.45	7.93	11.02	5.49	5.85	13.98	7.98	8.05	7.75	12.93	7.32	3.56	11.5	14.63	8.69	5.38	12.33	6.15	6.12	5.27	14.21	10.06	11.06	8.44	4.7	11.98	11.3	9.97
W1a17043|c0_g1_i1	0	0	0.22	0	0	0.04	0	2.12	0	0	0.72	0.79	0	3.44	0	0	0.17	0	0	0	0	0	0	0	0	0	0	0	0	0	0.19	0.2	4.1	0	0	0	0	1.91	0	0	0	0	0.24	0	0	4.88	0	0.02	0
W4a20621|c0_g1_i1	1.52	1.83	1.14	0.82	0.99	1.26	0.95	2.18	4.5	3.21	1.98	2.34	1.03	2.03	0.34	0.73	1.7	0.78	1.38	1.31	3.1	1.25	0.56	1.33	2.46	1.97	1.65	0.48	0.99	2.9	1.04	1.42	2.81	1.36	3.86	1.74	1.51	2.02	3.75	0.84	1.44	2.66	0.26	2.96	2.57	1.13	2.19	2.02	2.01
W1a14243|c0_g1_i5	0.62	1.31	0.43	0.1	0.37	0.57	0.16	0.48	4.27	0.83	0.16	1.36	0.87	1.56	0.17	0.6	0.35	0.44	0.14	0.53	0.51	0.64	0.11	0.45	0.34	0.51	0.67	0.39	0.29	0.59	0.47	0.51	0.33	0.95	1.32	0.19	1.34	1.38	0.77	0.11	1.68	0.82	0.27	1.82	0.32	3.42	0.95	1.35	1.62
W7b27467|c0_g1_i1	0.17	0.59	0.47	1.57	0.24	0.61	0	1.27	2.89	0.83	0.35	0.95	0.6	0.98	0.25	0.85	0	0.34	1.27	0	0.27	1.03	0	0.39	0.4	0.63	0.69	0.09	0.74	0.51	2.06	0.58	0.26	2.26	1.71	1.24	0.88	0.64	0.34	0.24	0.06	0.15	0.84	1.46	5.28	0.58	0.43	0.31	1.22
W7b15748|c0_g1_i1	0	0.64	0	0.06	0	0.14	0	0.65	1.84	0	0	0.49	0	0.12	0	0.06	0	0	0.16	0	0.05	0.29	0.39	0.47	0	0.19	0.06	0	0	0.14	0.36	0.12	0	1.29	0.19	0	0	0.06	0.25	0.05	0.22	1.95	0	1.11	2.9	0.2	0.26	0.11	0.2
W1a7190|c0_g1_i6	0.21	2.17	2	0.2	0.87	1.09	1.54	1.61	1.66	0.63	0.44	1.9	0.41	0.7	0.93	0.83	2.16	0.75	0.83	0.42	1.91	1.23	0.13	1.25	0.51	2.6	0.61	1.42	0.08	1.84	0.37	1	0.67	4.33	1.39	0.26	0.73	1.56	1.13	1.41	1.81	1.91	1.7	3.98	2.67	2.35	1.08	2.4	3.81
W1a16766|c0_g1_i1	0	0	0.08	0	0	0.02	0	1.16	0	0	0.55	0.55	0	2.92	0	0	0	0	0	0	0	0	0	0	0	0	0	0	0	0	0	0.15	1.52	0	0	0	0	1.96	0	0	0	0	0	0	0	4.36	0	0	0
W1a26334|c0_g2_i1	0.11	1	0.09	0.19	0.47	0.37	0	0.36	2.91	0.44	0.23	1.22	0.89	0.39	0.1	0.21	0.11	0.28	0.13	0	0.36	0.24	0.16	0.57	0	0.72	1.16	1.15	0.77	0.28	1.02	0.45	0.09	1	1.64	0.59	0.51	0.48	0	1.04	0	0.31	2.63	2.87	0.23	6.02	0.28	0.47	0.9
W7b8425|c0_g1_i5	0	0.1	0.34	0.17	0.43	0.21	0.3	0.9	0.78	1.06	0.31	0.66	0.31	0.44	0	0.76	0.1	0.31	0.12	0.11	0.16	0.11	0	0	0.29	0.09	0.29	0.34	0	0.1	0	0.19	0.15	1.11	0.86	0.58	0.13	0.18	0	0.22	0	0.83	0.82	0	3.61	0.3	0.51	1.47	0.85
W4a17308|c0_g1_i2	4.58	3.8	2.18	1.55	3.17	3.06	2.74	8.06	7.89	5.59	4.47	5.86	3.36	4.71	2	2.34	2.68	5.49	5.5	0.86	2.28	4.65	1.41	1.92	3.74	2.5	5.24	2.49	1.89	3.86	4.39	3.23	3.04	4.18	2.85	5.64	1.72	2.3	4.07	6.2	5.51	4.96	3.5	10.46	3.99	3.58	4.42	7.52	5.28
W2b16289|c0_g3_i10	1.28	0.31	0	0.14	0	0.35	0.48	0	0	1.14	1.67	0.58	0.37	1	2.43	0.31	0	3.95	0	0	0	0	0	0	0.12	0.3	1.08	0	0.71	0	0	0.54	0.12	0.65	0	0.13	0	0.14	0	1.06	0.35	0.67	1.1	0.38	0.17	0.24	0.21	0.31	0.95
W6b7996|c0_g1_i1	52.95	55.62	47.7	58.81	50.48	53.11	37.86	77.58	116.47	52.81	58.16	61.74	63.81	85.56	49.43	44.22	45.37	36.16	72.05	44.41	60.73	51.07	34.34	45.26	71.54	61.68	58.61	47.88	54.22	65.83	63.1	55.54	55.92	54.74	69.76	35.9	52.2	54.69	52.61	61.87	74.73	59.6	40.37	61.33	47.16	36.27	39.18	82.47	65.06
Contig42773	0.99	0.59	2.03	0.4	0.73	0.95	1.22	1.13	3.48	1.22	0.24	1.28	0.77	1.84	0.34	0.44	1.6	0.31	0.56	1.58	2	0.59	0.97	0.09	0.66	0.72	1.03	1.55	1.19	1.25	2.19	1.04	0.3	1.09	2.22	0.89	2.33	0.41	0.85	1.35	1.49	0.11	0.95	1.47	4.61	1.14	0.49	2.31	2.61
W2b15309|c1_g1_i2	0	0.35	0.05	0	1.47	0.37	1.5	0.1	0.83	0.37	0	0.5	0	0.96	1.24	0.75	0.24	0.81	0.22	0.14	0.2	0.92	0.65	0.07	0.17	0.4	0.06	0	0.18	0.25	1.06	0.44	0	0.31	1.69	0.15	0	0	0.74	0.35	0	1.01	0	0.29	0	1.26	0.39	1.33	0.92
W3d15832|c0_g1_i1	0	1.04	0.46	0.82	0.59	0.58	0.54	0.44	0.53	0.84	3.37	0.98	0.42	0.72	0.48	1.03	1.34	0	0.98	0.31	1.21	1.33	2.37	0.63	0.29	2.3	0.26	0.68	0.7	0	0.59	0.82	0.74	2.07	0	0.34	0.36	1.32	1.17	0.79	0.29	0	0.37	2.42	0.28	1.01	2.6	0.26	2.77
W4a24523|c0_g2_i1	0.58	0.75	0	1.01	1.19	0.71	1.56	0.64	1.93	0.69	0.2	0.97	0.3	1.56	0.7	1.49	0.39	0.8	0.71	0	1.75	0.43	0.57	1.14	1.55	0.92	0.56	0.49	0.43	1.98	0.64	0.86	0.46	1.59	0.57	0.16	0.78	0.69	1.2	0.43	0.63	1.64	0.81	1.4	0.61	0.87	1.75	0.49	1.35
W3d31004|c0_g1_i2	5.26	3.31	4.34	4.73	4.83	4.5	10.97	6.19	3.89	9.55	7.01	7.96	4.72	6.17	4.4	8.08	6.75	10.93	4.16	11.11	4.98	5.16	7.45	8.13	4.19	4.28	8.53	5.23	6.23	8.57	5.34	6.55	7.28	3.6	3.64	7.76	4.82	4.95	4.68	8.11	3.79	2.01	4.69	9.96	11.81	7.1	10.15	13.31	29.74
W4a10468|c1_g1_i1	0.27	0	0	0	0.18	0.09	0.94	4.04	1.47	0.12	0.07	1.25	0.42	0.12	0	0.06	0	0.14	0.16	0	0.11	0.15	0	7.26	15.35	0.06	9.89	2.86	0	0	0.45	1.95	0.11	0.28	0.59	0.11	0	4.91	0.08	0.15	0	0.47	1.67	0.24	0.07	0.81	1.82	0.08	2.08
Contig44733	0	0.34	0	0	0	0.07	0.35	0.29	0	0.31	2.17	0.7	0	0	0.31	2.16	0	0	0.42	0	0.28	0	1.02	1.22	1.13	0.82	0.34	0.59	0	0.71	0.76	0.51	0.27	0	0.67	0	0.23	0	2.36	0.51	0.19	0	0	0.83	2.71	0.26	0.67	1.46	2.59
W1a15868|c0_g1_i3	0.63	0.45	0.56	0.52	0.64	0.56	0.7	0.36	0.8	0.44	0.71	0.66	0.49	0.84	0.65	0.33	0.78	0.59	0.44	0.99	0.79	0.83	0.54	0.92	0.53	0.4	0.55	0.42	0.21	0.91	0.63	0.62	0.41	0.96	0.63	0.41	0.21	0.67	0.81	0.62	0.68	0.48	0.76	0.72	0.57	0.82	0.67	0.72	0.79
W3d16244|c0_g1_i1	0.39	0.48	0.29	0.27	0.32	0.35	0.45	1.25	0.29	0.44	0.38	0.52	0.28	0.28	0.37	0.3	0.44	0.22	0.19	0.3	0.51	0.03	2.41	0.25	0.26	0.32	0.63	0.51	0.51	1.04	0.58	0.5	0.12	0.51	0.3	0.55	0.42	0.23	0.58	0.23	0.31	0.7	0.65	0.22	0.25	0.98	0.24	0.5	0.53
W4a4946|c1_g2_i2	0.83	0.8	0.21	0.14	0.58	0.52	0.67	1.09	0.82	0.59	0.96	0.75	0.71	0.67	0.3	0.4	0.08	0.34	0.51	0	0.61	0.64	0.57	0.29	2.89	1.89	0.8	0.28	0.49	1.1	1.1	0.72	0.39	0.6	0.4	0.9	1.44	0.44	0.31	0.31	0.27	0.82	0.92	0.7	0.43	0.87	0.75	1	0.39
W2b6695|c0_g1_i1	0.48	0	0.74	0	0	0.24	11.9	0	0	0	0.1	2.12	0	0.17	7.38	0	0	0	8.51	0.11	0	1.27	0	3.03	0.07	0	0.56	0	0.29	0	0.21	1.14	0	0	0	0	0	0.17	0	41.3	0	0	0	0.23	0	1.87	4.57	11.65	47.04
W1a25490|c0_g2_i1	0	0	0	0	0	0	0.38	0.77	0.56	0.17	1.18	0.94	0.44	0	2.52	0.54	3.93	7.36	0	0.22	0.31	0.41	0	0.44	0.27	0.18	0.18	0	0.28	0	0	0.9	0	0.38	0	1.25	0	0.33	0	0	0.2	1.58	0	1.35	2.74	3.09	0.72	6.11	6.42
Contig6768	0.17	0.22	0.1	0.05	0.63	0.23	0.11	1.25	1.14	2.07	1.41	1.43	0.58	0.85	0.46	1.68	1.23	16.72	0.42	1.19	0.38	0.69	0.68	0.2	0.29	0.14	2.41	0.73	0.17	2.7	0.7	1.7	0.94	0.53	0.28	0.84	0.23	0.2	0.53	0.53	1.37	0.52	0.32	1.76	2.66	1.59	1.18	4.25	6.82
W4a27650|c0_g7_i1	2.19	0.37	0.44	2.68	0.67	1.27	0.52	4.03	0.26	4.13	0.67	2.26	2.6	2.3	0.46	1.61	1.29	0.13	0.78	1.63	0.74	1.42	0.76	1.51	6.06	3.66	0.37	0.66	0.96	1.45	0.57	1.52	0.5	0.26	0.25	1.18	1.88	0.34	1.12	0.47	2.1	0.18	0.53	0.31	1.34	0.96	2.32	4.63	2.82
W6b14389|c0_g1_i2	1.62	1.46	3.45	0.68	4.23	2.29	1.57	3.47	4.55	2.51	4.58	3.02	5.07	3.02	2.8	2.3	1.72	0.97	4.5	2.94	4.49	2.69	1.84	1.89	1.51	1.73	3.88	2.92	0.81	1.97	2.07	2.59	2	3.42	0.91	1.83	1.46	3.67	1.62	6.08	0.62	2.93	0.94	6.26	1.85	2.19	0.94	2.11	4.22
W7b5845|c0_g1_i1	0	0.25	0	0	0	0.05	0	0	0.9	0.23	0	0.23	0	0	0	0	0	0.54	0.16	0	0.21	0	0	0	0	0	0	0	0	0.13	0.29	0.07	0.41	0.27	0	0	0	0	0	0	0	0	0	0	2.16	0	0	0.04	0.17
W4a10112|c0_g4_i1	0.13	0.12	0	0.11	0.77	0.22	0.38	0.1	6.46	0.34	0.26	1.26	0	0.22	0.11	0.12	0.25	0.26	0	1.15	0.1	0.55	0.37	0.29	2.27	0.12	0	0.11	0	0.38	0	0.33	0.88	0.51	0	0	0.17	0.22	0	0.28	0.41	0.35	0	0.15	0.78	0.19	0.97	0.63	0.71
W1a23343|c0_g1_i10	0.35	0.49	0.26	0.16	0.48	0.35	0.41	0.36	0.41	0.57	0.34	0.57	0.43	0.39	0.41	0.29	0.71	0.38	0.22	0.18	0.24	0.91	0.09	0.3	0.25	0.5	0.91	0.37	0.17	0.99	0.28	0.42	0.34	0.31	0.33	0.34	0.37	0.27	0.54	0.25	0.12	0.58	0.79	1.21	0.31	0.72	0.53	0.77	0.53
W7b11696|c0_g1_i1	0	0.44	0.1	0.1	0	0.13	0	8.3	2.12	1.86	0.82	2.18	0	0.25	0	0.05	0.51	0	0	0	0.09	2.17	0.11	0	0	3.26	0	2.44	0.21	0.86	0	0.52	0.18	0.23	0.82	0.09	3.3	0	0.28	0.08	0.12	0	0	0	6.93	0	0	0.4	0
W6b15883|c0_g1_i1	1.77	0.95	1.57	1.46	0.83	1.32	1.27	2.98	2.26	1.55	2.06	2.05	1.86	0.8	0.9	1.75	1.29	1.65	1.26	2.13	1.04	1.64	2.12	1.19	1.18	1.07	0.92	1.64	1.44	1.72	1.7	1.44	1.01	1.84	1.23	1.15	1.38	0.98	1.36	3.34	1.01	1.3	1.44	0.47	2.26	2.02	0.76	3.17	4.51
W2b21450|c0_g1_i1	0	0	0	0	0	0	1.86	1.15	0.23	3.32	0	1.09	0	0.21	1.66	0	0.12	0	0	0.53	0	0	0	0	0	0.66	0	0	0	0	0	0.17	0	0	0	0	0	0	0	0.43	0.5	0.33	0.32	3.35	0	0.17	1.05	0.82	0.85
Contig27076	1.06	0.85	0.76	0.38	0.38	0.69	16.22	0	0.35	0.55	0.74	4.92	0.82	0.86	0.87	4.23	0.97	1.09	0.43	2.23	1.37	0.77	0.78	9.08	0.38	1.17	0.68	0.22	0.33	2.07	0.97	1.54	6.07	0	0.77	1.62	0.47	0.47	0.33	0.52	0.67	1.48	0.12	0.42	0.64	0.26	39.69	0.62	0.67
W4a6467|c0_g1_i2	0.84	0.72	2	0.84	0.5	0.98	1.71	1.01	2.05	3.88	0.69	1.63	0.24	1.49	0.75	2.45	2.32	1.04	2.19	1.16	0.07	1.59	0.13	1.6	4.96	0.92	0.93	1.56	0.36	1.79	0.39	1.37	0.48	3.1	2.47	0.7	0.64	0.94	1.2	0.32	1.05	1.3	0.61	0.37	0.41	2.17	0.23	0.95	2.03
W1a4588|c0_g1_i4	1.11	0.66	0.9	1.39	1.02	1.01	0.49	3.29	2.93	0.82	3.41	2.57	0.53	5.82	1.76	0.65	0.74	2.67	5.69	0.42	1.97	0.68	0.3	4.4	2.81	3.09	0.42	1.36	0.92	2.39	0.48	1.95	1.54	0.25	3.23	1.85	0.41	0.93	0.61	0.82	4.01	0.61	0.77	2.66	3.47	1.29	1.27	3.42	0.45
W3d16755|c0_g1_i1	2.19	1.89	0.97	2.21	1.65	1.78	3.49	3.31	3.46	3.75	2.17	2.95	2.62	2.96	1.54	2.5	2.48	4.22	1.94	2.11	2.48	2.8	3.95	1.87	1.67	2.36	4.4	1.46	1.63	1.51	3	2.5	1.02	4.91	1.95	1.78	1.1	2.21	1.03	2.79	2.25	2.49	2.37	1.64	2.78	4.96	2.13	2.11	1.55
W5c4632|c0_g1_i2	2.07	2.07	1.58	1.66	2.94	2.06	2.6	4.34	2.12	2.52	3.2	2.71	3.39	2.25	1.09	2.06	1.22	2.53	1.77	2.37	1.63	4.54	1.87	2.06	5.03	3.26	3.55	2.92	1.82	1.33	2.28	2.47	3.53	3.13	1.04	2.23	3.25	2.72	1.23	2.43	2.49	1.61	3.06	1.65	1.2	2.86	1.67	2.9	2.49
W1a14314|c0_g1_i1	0.18	0.36	0.39	0.2	1.04	0.43	0.46	1.55	3.73	0.08	5.99	3.03	3.64	2.21	2.01	0.09	0.55	0.19	1.06	3.43	1.95	0.35	0.81	0.59	0.17	2.69	1.24	3.23	1.71	0.56	4.65	1.64	2.19	0	0.76	1.45	0.24	3.14	1.14	1.05	3.08	0.06	0	0.83	5.16	1.78	2.48	0.67	4.98
W0d16774|c0_g1_i5	1.26	0.84	0.33	1.17	1.94	1.11	2.03	1.11	0.67	4.38	2.42	1.94	2.02	3.1	1.38	1.11	1.64	1.29	1.17	2.22	0.71	1.38	1.32	0.56	1.47	0.64	0.47	1.72	1.79	2.17	1.06	1.43	1.21	0.89	1.03	1.05	0.26	0.94	2.03	2.85	1.26	0.41	0.93	0.7	1.31	0.87	2.23	2.27	1.95
W2b32427|c0_g1_i1	0.41	0.4	0.78	0.14	0.14	0.37	6.17	1.62	8.63	5.42	2.92	4.31	1.92	1.39	3.45	3.47	7.38	33.25	0.6	0.94	0.27	0.72	0.16	0.87	0.12	1.48	2.3	0.14	0.18	1.43	0.09	3.17	1.16	0.93	0	0.82	0.22	0.51	1.22	2.61	0.18	0.35	0.91	13.13	0.26	3.2	4.65	5.53	9.06
Contig13717	0.69	0.66	0.84	0.45	1	0.73	1.72	1.22	1.59	2.91	3.77	1.93	1.34	0.97	0.92	0.82	0.69	0.3	2.16	1.78	1.08	1.38	2.36	0.67	1.28	1.95	1.77	1.89	1.15	1.4	0.95	1.31	0.22	0.41	0.89	2.2	0.91	1.94	1.99	0.68	0.62	1.21	0.32	2.75	0.72	3.6	2.28	1.32	2.36
Contig29662	0.14	0.27	0.48	0	0	0.18	3.81	1.16	0.98	1.26	2.94	1.86	2.19	1.01	0.25	0.27	2.67	4.8	2.06	0	1.5	0	0.55	0.66	0.1	1.07	0	0.96	0.84	1.44	1.09	1.13	0	0.58	0.82	0.59	0	0	0.35	4.16	0.31	0.4	0	2.03	0.29	0	0	3.6	7.39
W4a28230|c0_g1_i1	7.11	7.66	10.27	4.06	7.42	7.3	8.63	18.7	21.04	17.33	4.21	14.69	8.58	10.91	7.61	20.45	18.88	11.91	11.75	8.91	6.82	17.26	1.59	14.43	28.52	8.77	7.92	8.62	4.61	15.68	4.2	11.44	4.77	11.88	9.95	15.33	11.56	9.32	6.82	2.26	15.61	13.22	2.72	6.42	6.65	11.05	8.61	7.86	20.73
W6b22782|c1_g1_i2	0.42	1.18	0.44	0.22	0.56	0.57	0.97	1.59	1.24	1.03	3.93	1.58	0.95	0.98	0.89	0.62	1.73	3.22	0.86	1.04	0.95	0.53	0.32	0.45	0.4	0.88	0.87	0.65	0.84	2.17	0.71	1	0.28	0.89	0.47	0.8	0.3	0.57	0.88	3.63	0.31	0.77	1.38	1.12	0.94	1.11	0.54	1.46	2.02
W1a17860|c0_g2_i1	0.33	0	0.11	0	0	0.09	0.4	0.11	0	0.71	0	0.85	0.36	0.53	0.35	0	0.33	0	0.24	0.15	0.38	0	0.13	0.08	0.14	0.44	1.28	0.28	0.15	0.34	0.95	0.32	0.31	0	0.26	0.22	0.61	0.12	0.41	0.05	0.29	0	0.18	0.08	1.79	1.78	0.08	0.07	0.02
W3d23238|c1_g9_i1	0	0.15	0.02	0	0	0.03	0.14	0.26	0.06	1.19	9.45	1.91	0.11	0.07	0.12	0.29	0.4	0.41	0.07	0.57	0.08	0.13	5.47	0.19	2.21	0.11	0.23	0.45	0.24	0.26	0	0.6	0.12	0.31	0.12	1.38	0.11	0.14	0.52	0.21	0.11	0.06	0.41	0.14	0.56	0.39	0.1	0.17	0.42
W1a16383|c1_g3_i4	0	0.54	0.16	0	0	0.14	0.37	0.77	1.67	4.5	27.97	6.67	0.58	1	0.67	1.08	3.36	1.35	0	0.86	0	0	3.85	0.22	13.81	1.6	9.04	0.48	0.56	2.1	0	2.13	0.73	2.11	1.82	0.47	1.24	0.5	0.46	0.14	1.62	0.53	0	3.82	1.95	2.24	2.17	0.47	2.8
W5c15606|c0_g4_i1	0.18	1.71	4.39	0.92	0.31	1.5	0.71	4.35	7.86	0.78	0	2.66	2.47	0.31	0.16	8.29	3.34	1.82	0.43	0	0.43	3.87	0.86	0	0.13	0.67	2.55	0.45	3.15	5.04	0.19	1.8	6.48	1.44	0.17	1.47	0.23	2.04	0.22	1.3	3.82	0.25	3.41	0.42	0	1.32	2.27	0.2	4.74
W4a1972|c0_g1_i1	0.66	0.74	1.22	0.19	0	0.56	0	5.57	1.52	0.68	1.14	1.56	0.76	0.58	0	0	0	0	1.19	0.25	0	2.76	0.11	1.02	5.69	0	0	0	0	1.34	4.81	0.98	0	1.23	0.85	0	0	2.33	3.25	0.24	0	2.61	0.6	7.22	0	3.92	0	0.06	0
W7b13740|c0_g1_i2	0	0.25	0.11	0	0.11	0.09	0	0.32	3.57	5.15	0.13	1.53	0	0	0	0.62	0.26	0.27	0	0	0.32	0.57	0.13	0	0.19	0	0.12	0.65	0	0.26	0	0.18	0	0	1.12	0.64	0	0.11	0.48	0.09	0	0	1.6	0.31	3.22	0.38	0	2.2	1.02
W1a10026|c0_g1_i1	0.67	0.51	0.41	0.25	0.33	0.43	0.57	0.86	1.08	1.14	0.05	0.82	0.7	0.72	0.47	0.46	0.85	0.1	0.4	0.6	0.78	0.26	0.47	0.67	0.34	0.23	0.69	0.16	0.6	0.44	0.63	0.5	0.33	0.34	0.09	0.48	0.25	0.8	0.29	0.14	2.01	0.67	1.12	0.29	0.45	0.28	0.43	0.52	1.36
W7b9813|c0_g2_i1	6.67	5.26	5.86	1.97	4.11	4.77	7.39	4.94	15.28	8.46	13.74	9.03	9.02	3.77	5.74	4.13	8.75	6.37	3.95	4.29	5.12	4.91	1.83	5.13	3.7	5.85	5.49	5.71	8.27	5.06	6.35	5.44	5.08	6.32	5.83	6.02	5.51	3.18	4.53	5.63	9.86	6.04	4.93	5.17	11.08	8.99	4.18	8.2	6.52
Contig4600	1.31	1.58	1.3	0.62	1.29	1.22	3.06	1.89	1.33	3.27	1.33	3.11	1.84	1.39	1.11	1.37	1.9	1.06	1.9	1.56	1.49	1.21	0.64	2.57	1.43	1.71	2.62	0.8	0.63	0.86	1.91	1.47	0.82	4.06	2.15	2.52	1.78	2	0.98	0.8	1.55	1.83	4.27	3.09	2.63	3.39	1.88	2.97	2.22
Contig40834	1.65	1.6	1.02	0.32	1.04	1.13	20.81	9.05	4.9	18.54	56.68	19.78	2.28	2.21	1.31	1.94	18.66	16.36	3.9	12.95	0.75	0.81	5.48	1.29	2.12	1.04	0.89	2.56	1.36	8.8	2.52	4.59	0.29	18.86	0.98	2.29	2.8	3.18	1.48	111.18	4.28	2.57	2.91	12.77	8.69	9.6	3.77	22.27	29.78
W7b16724|c2_g1_i3	0.86	0.99	0.07	0.52	0.75	0.64	1.11	0.63	0.25	1.6	2.32	1.29	0.47	1.68	0.61	0.33	0.43	1.32	0.52	0.1	1.96	0.28	0.75	0.2	0.99	0.41	0.99	1.16	0.19	0.52	2.07	0.79	0.2	1.05	2.41	0.93	1.14	0.84	0.95	0.44	0.28	1.92	0.47	1.64	3.74	1.15	0.44	1.73	0.62
Contig4713	0.21	0.1	1.08	1.04	0.86	0.66	1.25	0.09	0.52	8.54	0.05	2.77	0.36	0.42	0.33	0.5	0.1	0.81	0.89	1.02	1.92	0.57	1.02	1.1	0.83	0.89	0.45	1.15	0.7	0.53	2.58	0.85	0.57	0.43	1.11	1.09	2.36	0.28	2.07	1.11	0.57	0.95	0.58	1.13	1.52	3.82	2.15	0.8	1.49
W7b7362|c0_g1_i2	0.56	0.11	0.32	0.45	0.26	0.34	3.19	0.96	0.82	4.21	2.7	2.12	0.26	0	0.03	0.29	0.04	1.35	0.36	1.25	0.46	0.95	1.03	0.31	0.43	0.5	0.29	0.48	0.45	2.41	0.66	0.61	0.44	0.65	0.44	0.53	0.35	1.03	2.56	5.84	0.41	0.42	0.16	0.27	7.66	0.56	0.68	2.09	6.72
W2b23970|c0_g1_i5	0.15	0.05	0.08	0	0.17	0.09	1.36	1.92	0.39	15.91	12	5.31	1.51	0.3	2	0.84	2.04	0.3	0.83	0.67	0.04	0.16	0.24	0.85	0.56	0.88	1.55	0.87	0.14	4.32	0.75	0.99	0.72	0.65	0.76	2.15	0.26	1.21	2.23	2.58	1.95	1.5	0.27	1.4	1.01	2.77	0.88	2.25	2.08
Contig33238	0	0	0.13	0	0	0.03	1.98	6.76	0.75	6.24	32.45	10.05	0.95	0	0.41	2.49	5.32	10.53	0.37	0.7	0.37	0.67	1.19	2.67	0	0.58	1.62	1.03	0.11	1.71	3.19	1.78	0.24	0.16	0	5.08	0.61	6.5	4.72	10.67	1.16	1.28	0.84	10.42	0.95	5.7	2.94	13.5	2.12
Contig34835	6.43	9.98	11.11	4.65	5.26	7.49	23.82	27.18	17.39	30.48	16.75	24.06	18.27	8.82	11.28	9.9	18.57	19.16	13.58	9.3	8.17	7.57	5.91	14.95	9.2	14.5	19.36	10.62	5.88	10.85	15.52	12.18	5.18	20.84	12.46	14.5	13.2	18.18	11.58	23.22	10.05	23.44	16.5	21.6	20.68	35.59	13.57	24.53	30.53
Contig30667	0.11	0.08	0	0.1	0.41	0.14	2.91	0.73	0.25	10.78	26.32	6.94	2.82	0.07	0.32	0.35	3.51	0.29	0.74	2.1	0.82	0.21	0.19	0.62	0.32	0.16	3.72	0.61	0.66	0.85	0.4	0.99	1.45	1.56	1.4	3.19	0.44	1.31	0.48	12.19	1.26	1.28	0.04	1.2	0.69	7.29	1.21	1.51	1.41
W6b4946|c0_g1_i3	0	0	0	0	0	0	0	1.58	0.22	0.8	2.83	1.06	0.18	0.1	0	0	5.18	0	0	0.39	0	0	0	0.26	0	0.11	0.76	0.1	0	0	0.87	0.42	0.09	0.23	0	0	0	0.1	0.42	4.99	4.53	0.16	0	13.95	0	0	0.58	0.09	0.37
W5c26901|c0_g1_i1	2.69	1.76	2.42	3.7	3.62	2.84	6.52	10.29	7	10.68	7.42	8.39	4.77	3.48	5.67	4.27	3.91	10.84	2.67	3.16	2.95	2.61	2.45	8.71	2.63	3.68	6.28	2.29	2.37	3.58	9.11	4.5	10.39	6.18	6.26	6.56	2.68	4.59	5.11	6.45	4.01	6.58	8.5	8.97	5.47	8.73	5.1	6.27	9.77
W5c24369|c0_g1_i1	1.33	0	0	0	0	0.27	0	0	0	20.92	0	3.69	0.74	0	0.17	0	0	0	3.68	0	0	3.95	1.11	0	0	0	0	0	0	4.06	0	0.72	3.7	0	0.37	0	0	24.09	0	0	0	0	0	0	0	0	0	43.45	0
W1a19984|c0_g1_i1	0.16	0.38	0.16	0.84	0.14	0.34	0.76	0.54	0.1	0.56	0.85	1.12	0.39	0.19	0.28	0.43	0.34	0.11	0.64	0.97	0.56	0.32	0.31	0.55	0.21	0.5	0.58	0.58	0.74	0.86	0.81	0.49	0.39	0.7	0.46	1.01	0.45	0.44	0.39	0.31	0.43	0.96	0.51	0.25	0.52	0.43	0.71	1.64	0.93
W1a14453|c0_g1_i3	11.67	9.57	8.38	5.95	10.92	9.3	39.29	22.66	18.04	43.3	25.67	32.35	9.67	14.63	10.68	8.08	8.11	54.91	18.28	11.2	14.15	8.15	7.51	13.14	14.39	14.9	15.78	16.29	13.09	17.48	16.57	15.11	11.51	22.43	15.15	21.45	17.94	16.42	12.71	19.36	22.87	24.14	24.74	29.03	16.61	32.47	20.42	23.21	29.26
W1a2717|c0_g1_i1	0.57	0.37	0.08	0.25	0.5	0.35	22.76	1.49	21.61	3.73	8.55	10.43	0.44	1.02	0.77	1.55	2.09	2.95	0.58	1.64	0.86	2.3	2.24	2.34	1.17	1.62	3.31	1.05	2.2	3.99	1.26	1.76	0.82	2.34	5.17	6.11	1.39	1.95	2.6	7.51	1.96	1.74	1.97	3.32	5.66	6.98	4.41	9.8	4.58
W4a27027|c3_g2_i3	91.31	10.18	8.02	59.27	8.09	35.37	63.56	21.87	17.61	69.4	60.32	39.1	10.03	68.24	56.41	15.63	21.36	14.71	8.95	32.28	50.42	9.86	16.05	11.96	320.04	16.51	14.67	26.67	23.63	20	10.68	39.37	102.61	9.34	8.65	11.58	26.33	62.98	8.8	47.54	35.82	6.77	39.22	15.44	17.77	11.95	75.05	8.64	40.07
W7b28675|c1_g3_i1	0	0	0	0	0	0	0	0	2	0.36	0.42	0.46	0	0.72	0	0	0	0	0	0	0.33	0	0	0.47	0	0.95	0	0.34	0.6	0	0	0.18	0.32	0	0.98	0	0	0	0	0.3	0	0	0	2.18	1.89	0	0	0.06	0
Contig35242	0.44	0	0.68	0.45	0.15	0.34	1.57	3.59	2.08	1.32	3.47	2.16	0.61	0.78	0.78	1.01	2.44	0.72	0.53	1.21	0.29	0.86	1.11	1.13	0.89	0.41	3.38	0.67	0.46	0.54	0.77	0.98	0.21	2.95	0.51	2.26	0.58	1.71	0.43	1.48	0.57	1.1	1.57	1.15	2.91	5.23	1.13	1.32	4.15
Contig37679	0.15	0.19	0.46	0.13	0.07	0.2	3.11	3.28	1.18	8.93	6.1	4.11	1.34	0.96	1.55	0.55	1.61	5.11	0.65	0.75	0.19	0.8	1.02	1.62	1.92	0.29	2.41	0.39	1.37	0.86	0.51	1.26	0.96	0.2	0.22	2.27	0.61	3.93	2.62	5.49	2.04	0.32	0.21	5.3	1.96	6.61	3.81	2.14	10.86
W6b15122|c0_g1_i1	0	0	0	0	0.25	0.05	0	1.32	0.58	0.39	2.89	0.86	0	0	0	0.42	0.73	0.9	0	0	0	0	0	0.51	0	0	4.5	0	0	0	0	0.37	0	0.15	0	0.24	0	0	0.36	3.76	0	0	0	0.7	0	0	0.75	0.53	0.63
Contig39493	0.98	0.81	0.3	0.42	0.49	0.6	23.68	2.12	7.59	9.12	5.97	8.41	2.16	2.3	0.75	2.21	6.46	3.59	0.59	2	1.6	6.35	1.5	1.06	0.5	0.79	1.14	0.77	1.35	5.12	0.69	2.15	0.76	3.28	3.58	3.08	0.74	3.1	1.55	3.08	1.36	1.96	3.94	4.18	5.22	7.3	2.42	7.93	5.08
Contig6148	0.89	1.06	1.12	1.17	1.87	1.22	46.5	5.27	12.99	12.65	23.42	19.93	3.83	3.42	2.83	5.26	7.49	10.35	1.43	2.37	1.93	10.15	1.94	2.57	0.61	1.36	9.81	2.5	1.91	11.4	9.1	4.75	2.08	3.41	1.27	4.92	0.5	5.47	5.85	12.12	2.97	2.31	7.16	15.89	7.95	9.9	4.29	10.36	17.69
W1a5214|c0_g1_i4	3.99	2.17	12.34	2.11	3.7	4.86	32.41	12.87	4.04	13.02	5.59	16.57	9.93	5.37	7.75	4.72	11.01	18.12	4.07	7.99	6.08	9.93	7.51	2.31	4.01	7.23	12.47	4.51	6.72	4.06	5.12	7.31	4.5	4.52	1.04	14.92	4.76	11.84	13.64	8.51	4.17	7.04	6.1	2.89	5.26	16.32	8.44	9.4	15.56
Contig6126	0.29	0.1	0.25	0.25	0.09	0.2	8.33	4.56	3.21	12.23	21.27	10.16	2.1	1.48	1.71	2.35	1.76	3.64	2.41	5.34	2.01	1.51	1.06	1.73	1.17	1.57	2.23	0.86	0.75	3.13	2.7	2.08	0.93	2.32	2.13	1.56	1.49	3.88	0.76	3.16	2.5	0.76	0.7	5.11	5.26	4.31	3.71	10.98	30.2
Contig26038	0.9	0.39	0	1.39	0.48	0.63	2.15	33.54	0.89	71.73	150.58	44.06	1.91	1.88	1.12	3.99	3.5	14.37	3.05	4.49	3.08	0.28	2.85	1.88	2.03	1.76	8.91	2.97	2.31	5.01	5.02	3.71	2.86	1.54	1.94	4.26	2.6	5.97	2.61	9.49	2.07	2.25	2.84	7.88	5.48	8.85	6.51	20.25	9.58
Contig37494	1.43	0.79	0.58	1.82	1.39	1.2	5.5	49.16	3.19	126.91	258.65	77.06	3.46	3.85	5.29	7.32	3.64	19.91	4.74	9.41	6.92	0.96	5.66	5.02	4.01	4.33	20.88	5.66	3.57	6.67	9.98	6.91	2.59	3.85	4.22	8.56	6.08	13.39	5.35	27.29	4.87	3.38	5.23	15.29	8.94	14.65	14.25	34.33	18.51
W4a7498|c0_g2_i1	0.8	0	0.28	0	0	0.22	0	0.4	3.34	0.29	0.67	0.78	1.25	0.86	0.57	0.46	0	0.17	0	0.74	0.53	0	0	0.38	2.32	0.3	0.31	1.09	0.24	0	0	0.48	0.25	0	0	0.27	0.85	0.29	0.2	1.18	0.35	0.45	0	0.39	0.33	0.24	0.83	0.27	0.43
W1a19650|c0_g1_i1	2.43	1.27	0.46	1.68	0.68	1.3	1.89	2.28	3.42	1.95	5.48	3.86	3.43	1.65	1.61	1.35	2.37	2.3	2.89	3.24	2.47	1.76	1.95	2.79	1.86	2.67	2.67	2.47	3.14	1.83	1.98	2.34	1.86	2.24	1.46	2.19	1.74	1.04	2.65	3.51	2.16	2.79	2.35	2.33	1.87	4.22	1.56	4.9	4.33
Contig39050	2.12	1.59	0.94	1.43	3.77	1.97	7.3	12.91	40.67	11.68	26.48	20.4	5.92	7.49	5.83	11	1.33	2.27	28.05	18.76	3.28	2.67	6.92	18.84	9.31	17.93	8.57	10.65	11.56	8.09	5.45	9.68	12.09	22.58	3.81	2.88	4.49	7.68	56.71	45.08	5.87	5.62	0.87	10.46	13.33	9.05	52.63	47.76	43.1
W3d31017|c0_g1_i5	0.51	4.8	1.31	4.03	0.88	2.31	4.56	5.74	11.83	10.1	0.74	5.62	1.26	7.58	0.18	1.46	0.81	3.86	1.11	0.47	20.49	7.34	14.08	1.54	7.61	0	3.23	4.03	3.91	1.14	10.15	4.75	0.71	3.94	1.47	18.56	0.81	12.42	5.27	1.19	2.31	5.82	2.24	2.07	7.8	2.42	5.99	3.89	17.36
W6b25147|c0_g1_i2	4.13	2.14	1.83	1.33	3.15	2.52	3.83	4.97	4.8	3.33	4.31	4.14	5.45	4.17	3.08	2.74	5.01	2.81	2.64	3.71	3.1	3.09	2.38	2.69	2.15	3.55	5.3	3.5	4.11	2.13	5.25	3.52	2.03	2.44	3.14	2.69	4.47	2.04	4.95	6.84	3.74	6.75	6.22	6.79	5.63	6.11	2.52	5.62	5.36
W6b4487|c0_g1_i1	0.1	0.38	0.42	0.08	0.43	0.28	1.46	1.68	1.45	2.08	1.32	1.69	0.83	1.48	0.52	1.03	1.65	7.85	1.07	1.68	0.96	0.43	0.29	0.34	0.35	0.28	1.32	2.4	0.65	0.7	0.32	1.27	0.61	1.5	1.7	1.87	1.56	0.52	0.36	2.44	0.63	1.09	2.29	1.05	1.42	1.31	1.25	2.27	3.46
W2b24426|c0_g1_i3	0	0	0	0	0	0	0	1.47	0	0.89	3.33	1.05	0.15	0.36	1.78	0	0.99	0	1.21	0.46	0	0	0.2	0.47	2.88	0	1.35	0.17	0	0.2	1.54	0.62	0	0.2	0.39	1	0	0.18	0.74	0.73	0.22	0.56	4.12	0	0.41	0.3	0.26	0	1.12
W5c20801|c0_g3_i1	0.28	0.14	0.36	0.49	0.12	0.28	0.42	0.46	1.39	0.63	0.88	0.73	0.22	0.25	0	0.4	0	0.58	1.37	0.32	0	1.55	0.28	0.16	1.02	1.2	2.04	0.36	0.1	1.72	0.31	0.63	0.77	1.15	1.36	0.47	0.19	0.63	0.7	0	0.92	0.79	0.39	3.04	0	1.26	0	0.71	0.84
W5c12148|c0_g1_i1	0.18	0	0.08	0.08	0.16	0.1	0.8	5.22	0.62	4.93	26.31	6.74	1.39	1.04	0.64	1.8	0.62	0.28	0.43	2.46	2.71	0.88	1.93	1.88	3.75	2.12	2.16	3.48	1.33	4.65	1.08	1.82	12.99	0.18	1.73	2.08	2.26	0.56	2.77	1.05	2.52	2.63	1.6	4.93	4.93	7.49	3.56	11.4	1.69
Contig4249	0.34	0.53	0.82	0.41	0.77	0.57	1.5	2.68	2.96	1.57	1.28	2.78	1.27	1.15	1.03	0.78	2.51	0.7	2.23	1.8	1	1.79	0.73	1.51	0.34	2.9	1.18	2.19	1.42	1.94	1.42	1.47	0.8	0.9	1.98	1.7	4.34	2.6	1.35	1.5	3.17	1.91	0.66	1.14	1.7	1.83	1.31	1.93	3.07
Contig10661	0.2	1.06	0.77	0.43	0.09	0.51	0.1	1.6	2.77	0.89	1.41	1.96	0.62	1.25	2.05	1.63	1.84	0.21	0.49	1.32	0.25	1.04	0.15	1.58	0.29	0.66	2.02	3.04	0.48	0.2	1.98	1.11	0.12	0.92	0.92	1.29	3.52	0.18	0.68	6.88	0.76	0.14	0.21	0.42	1.92	0.82	2.31	2.27	3.03
Contig32176	0.05	0.05	0.17	0	0	0.05	1.27	0.8	1.16	0.43	1.58	1.06	1.25	0.96	0.96	1.17	0.15	0.45	1.3	0.39	0.12	0.7	0.19	0.63	0.56	0.18	0.19	0.87	0.18	0.15	0.05	0.55	0.19	0.1	0.33	0.33	0.78	0.3	0.79	9.31	0.42	0	0.13	0.29	0.25	0.22	1.19	0.3	15.62
W6b28088|c0_g1_i4	0.39	0	0.06	0.11	0	0.11	2.76	1.3	2.73	1.46	1.78	1.92	1.23	1	2.47	1.77	0.92	2.24	0.64	1.51	0.43	0.72	1.09	0.77	0.24	0.62	0.57	0.95	1.27	0.4	0	0.99	0.36	1.41	0.57	0.99	0.7	1.17	0.81	16.18	0.5	0.46	0.09	0.63	0.62	0.59	1.01	1.57	7.74
W7b2152|c0_g1_i1	0	1.04	0	0.46	0	0.3	0.98	14.01	0	0.79	13.42	4.87	0	2.78	0.24	0	0.36	0.37	1.3	0.2	0.15	0	0.17	13.26	0.9	0.17	1.81	4.69	4.58	0.36	0.2	1.66	0	5.39	2.6	1.78	14.11	0.95	0.66	0.26	0	0.5	0.86	0.54	12.73	3.6	8.95	0.88	0.12
W7b12284|c0_g1_i3	0.82	0.96	1.54	0.73	1.58	1.12	3.89	3	4.46	3.6	6.25	3.86	2.13	2.26	1.72	1.31	2.67	2.6	1.26	0.81	2.13	1.65	1.45	2.84	1.45	3.22	4.26	1.44	2.09	2.28	3.72	2.17	1.88	4.09	1.86	3.99	2.47	2.55	1.89	3.55	1.15	3.22	3.6	5.12	7.94	3.87	2.9	4.2	3.98
W7b29669|c0_g2_i1	0	0	0	0	0.12	0.02	0.14	0.45	0.81	0.49	0	0.31	0	0	0.12	0.39	0	0.7	0	0.47	0.11	0.75	0	0	0.2	0	0.53	0	0.2	0	0	0.18	0	0.28	0.66	0.11	0	0.12	0.17	0.9	0.3	0	0	0	2.27	0.2	0.35	0.73	0.14
W5c28617|c1_g1_i1	1.41	0.82	1.09	0.24	0.49	0.81	4.23	1.62	0	4.9	9.13	3.98	1.64	2.51	1.39	3.11	1.97	2.62	3.6	1.13	1.62	3.25	2.49	0.99	1.73	1.2	0.14	2.27	1.15	2.73	0.93	1.92	2.31	1.88	1.23	1.41	0.37	2.01	1.4	13.19	1.22	1.78	2.92	2.71	1.76	2.95	2.36	4.15	7.25
Contig29727	0	0.18	0.45	0.08	0.38	0.22	1.34	1.93	2.94	1.15	3.29	2.32	1.45	0.51	0.26	2.34	0.57	0.84	2.21	0.93	0.31	1.73	0.61	1.23	1.04	1.36	0.46	2.27	0.85	1.27	0.84	1.11	0.78	2.79	0.74	1	0.76	0.85	3.79	15.43	0.47	0.4	0.73	0.46	1.59	1.57	4.92	2.01	39.05
Contig29684	0.73	0.23	0.12	0.48	0.54	0.42	2.88	3.42	3.47	2.56	7.06	3.9	1	0.93	1.3	1.23	1.45	5.29	1.68	2.79	1.65	1.37	1.8	2.31	1.98	1.25	0.67	1.91	1.78	2.51	0.5	1.76	2.44	2.8	2.86	6.15	1.43	2.99	1.46	3.98	1.88	1.22	1.29	1.37	5.34	3.21	2.59	4.05	4.08
Contig42460	3.69	2.07	2.68	1.69	2.41	2.51	15.73	10.97	4.21	11.21	28.16	15.58	9.22	6.96	7.85	4.44	11.24	18.31	7.57	10.23	6.88	11.96	8.54	5.6	2.8	4.59	7.02	8.64	5.43	7.35	9.18	8.09	7.45	8.18	4.67	7.32	3.22	4.98	3.94	35.62	6.99	14.26	13.46	17.91	9.08	13.89	12.18	20.71	27.77
W2b11383|c0_g1_i1	0.07	0.13	0.17	0	0	0.07	0.85	3.18	1.3	0.58	3.62	1.6	1.37	0.58	3.22	1.7	0.85	0.27	0.8	1.43	0.97	0.22	0.38	0	0.52	0.12	0.44	0.44	0.63	0.33	1.3	0.82	1.59	0.8	2.22	0.71	0.44	0.52	0.32	2.46	0.57	0.55	0.18	0.39	1.16	1.08	3.54	1.41	2.24
Contig14698	0.99	0.9	1.19	0.78	1.1	0.99	2.37	2.54	1.96	2.3	1.85	2.07	3.24	1.36	1.69	1.01	1.11	0.8	2.26	2.38	1.97	0.92	1.53	1.62	1.69	1.39	2.55	1.73	1.05	1.62	1.59	1.66	1.81	1.66	1.77	1.02	1.75	0.96	1.34	3.1	1.89	1.68	1.53	1.8	1.78	1.88	2.08	2.18	1.83
W1a11106|c0_g1_i1	0.33	0.16	0	0.43	0.14	0.21	2.64	1.9	0.33	3.68	7.77	3.45	1.8	0.74	0.59	0	0.33	7.84	0.4	2.85	2.44	0.73	3.4	0.58	0.84	3.29	1.92	0.98	0.86	2.02	1.82	1.76	1.68	1.01	2.08	1.1	0.44	2.94	2.25	2.19	1.97	0.7	3.65	3.77	5.85	0.99	2.98	7.09	13.87
Contig35006	27.99	20.86	16.24	33.68	43.69	28.49	170.42	58.04	206.89	117.64	82.14	127.16	92.26	113.89	133.77	99.42	80.23	319.64	42.85	90.09	53.36	103.9	92.82	40.45	28.45	41.84	42.02	46.11	54.56	35.46	28.64	81.04	58.14	65.08	79.06	96.24	54.46	77.38	68.38	165.89	76.59	109.71	119.68	93.01	101.63	109.32	132.87	130.11	163.3
W1a27297|c0_g1_i2	3.11	4.42	2.05	2.06	1.74	2.68	7.39	6.59	12.71	5.89	6.09	8.66	9.48	9.1	3.43	5.5	9.31	5.16	6.2	4.86	2.51	5.13	2.52	4.44	6.15	6.26	5.35	4.7	4.74	7.34	5.35	5.66	4.68	7.01	5.56	5.79	4.33	9.29	7.59	9.64	4.64	6	6.57	6.59	10.63	5.6	7.44	8.11	10
W1a4315|c0_g1_i1	0	0	0	0	0	0	0.13	2.7	0.13	6.91	0.55	5.12	0.41	0	0.23	3.15	8.13	0.27	0	0.3	0.11	0	0.13	1.23	0	0.25	8.88	0.22	0.29	0.94	0.58	1.32	0	0.94	0	10.41	0.17	1.52	0.49	2.23	3.56	1.11	2.36	2.05	0.14	0.39	1.18	7.78	1.57
Contig35769	0.07	0.31	0.25	0.25	0.34	0.25	1.83	3.66	0.6	6.27	2.81	2.68	0.7	0.42	0.74	0.62	3.12	1.93	0.31	1.73	0.41	0.2	0.99	1.01	1.95	0.65	1.53	0.73	0.43	0.55	0.44	0.97	0.45	2.98	1.29	1.71	0.81	1.05	0.62	5.32	2.06	1.97	0.94	0.99	1.01	4.46	2.54	1.63	1.53
Contig5251	0.76	0.41	0.29	2.2	0.78	0.89	9.82	2.09	6.29	4.87	11.9	6.82	2.11	3.51	2.76	0.98	2.75	0.96	1.7	4.28	1.7	1.81	3.24	2.43	2.91	1.4	3.27	4.09	3.34	5.62	3.92	2.78	2.12	4.72	4.11	6.92	5.07	4.63	3.25	3.15	6.52	4.52	4.68	4.17	6.79	5.89	13.73	7.03	13.63
W6b22480|c0_g1_i5	1.01	1.24	0.27	0.51	0.79	0.76	1.33	1.75	1.8	1.99	0.39	1.31	2.44	1.33	0.33	0.82	0.8	1.1	0.65	0.86	0.74	0.82	0.78	0.87	1.16	0.86	1.24	0.72	0.99	0.38	0.53	0.92	1	0.82	0.93	0.84	1.42	0.62	0.59	3.93	0.4	1.27	2.13	1.41	1.5	1.83	1.17	0.88	1.45
W1a4500|c0_g1_i2	2.65	2.06	3.26	2	2.45	2.48	3.42	3.34	4.98	4.17	3.83	5.14	3.59	2.97	2.89	3.31	3.84	3.12	2.88	3.82	3.94	3.15	2.14	3.32	2.34	2.83	3.04	3.55	2.04	4.75	2.85	3.18	3.06	6.34	4.16	6.14	6.84	3.18	4.77	2.7	4.91	4.5	4.55	4.81	7.06	4.1	3.65	5.33	7.19
Contig42489	2.14	2.74	0.83	2.57	1.9	2.04	21.77	5.27	17.81	8.12	48.03	17.37	1.9	2.72	1.29	2.85	4.35	13.28	2.44	10.32	3.36	4.99	7.44	4.9	5.46	4.96	9.52	3.59	4.51	16.83	4.76	5.76	6.01	7.32	11.94	31.5	4.35	11.25	10.81	18.08	6.86	8.45	13.79	15.14	24.59	23.24	16	33.56	28.12
W5c20815|c0_g6_i1	4.7	1.18	4.74	1.24	0.53	2.48	0.41	5.54	11.52	0.91	7.24	4.52	2.69	3.64	0.73	5.09	8.35	2.53	0.74	2.81	0.67	7.85	0.6	4.06	3.25	2.13	3.94	6.23	0.15	1.25	1.8	3.08	3.03	4.59	3.36	2.55	4.61	0.73	1.77	0.45	3.32	9.16	7.32	3.43	5.31	7.63	2.89	3.49	1.22
W1a13198|c0_g1_i2	2.49	3.61	3.51	1.64	3.48	2.95	5.82	9.11	10.33	5.96	3.71	7.4	5.25	3.42	2.2	3.62	4.78	5.75	6.21	7.01	3.21	4.58	1.62	4.85	3.29	7.43	6.37	2.64	3.4	5.21	5.18	4.53	5.99	6.72	8.28	6.36	5.34	5.95	4.47	6.59	9.35	7.21	8.6	7.78	6.78	9.18	7.45	10.3	7.03
W1a10322|c1_g2_i1	0.11	0.96	0	0	0.48	0.31	0.22	0.9	12.4	1.08	0	3.05	0.17	0.1	0	0.11	0.11	0	1.47	0	0.09	1.21	0	2.96	0.32	0.31	0.53	0.74	0.57	0.78	5.2	0.77	3.26	2.92	1.49	2.11	1.31	1.66	1.09	0.81	0.24	0.15	1.21	4.09	0.69	0.33	0.57	1.76	0.29
Contig6237	2.44	2.25	1.51	1.06	1.71	1.79	5.93	4.08	4.64	2.2	0.89	4.32	1.56	3.47	1.14	2.07	2.94	3.31	1.03	1.6	3.46	3.59	0.75	1	2.5	2.07	4.27	2.91	1.67	2.75	1.22	2.28	3.15	6.94	3.08	2.62	2.68	4.62	1.97	2.43	5.54	4.22	3.02	8.41	4.17	4.08	3.18	3.57	2.22
W6b20115|c0_g1_i3	3.45	1.2	1.87	0.87	1.9	1.86	3.61	3.46	2.72	2.86	2.48	2.8	2.88	1.13	2.75	3.82	2	4.59	2.28	1.08	1.84	3.42	2.85	0.98	0.8	1.62	2.87	2.3	1.57	1.16	1.88	2.2	2.12	3.25	1.62	3.76	2.04	2.32	1.66	6.73	1.6	2.3	2.12	1.57	2.72	1.6	3.1	3.14	3.88
W1a5277|c0_g1_i6	0.33	0.2	0.34	0.16	0.34	0.27	0.41	0.56	0.07	0.39	0.63	0.61	0.19	0.4	0.14	0.61	0.63	0.44	0.18	0.35	0.32	0.3	0.25	0.87	0.21	0.44	0.45	0.15	0.11	0.45	0.65	0.38	0.31	0.87	0.44	0.57	0.4	0.63	0.43	0.26	0.18	0.55	1.08	0.44	0.17	0.79	0.56	0.65	0.92
Contig42347	0.78	0.93	0.83	0.28	1.28	0.82	1.42	3.02	3.5	1.72	0.91	1.98	1.85	0.9	0.53	0.31	0.5	1.7	1.95	2.43	0.87	1.06	1.12	1.61	1.59	1.13	0.93	0.58	1.33	1.12	1.47	1.21	0.75	1.74	2.67	1.84	1.1	0.61	2.33	1.52	1.49	1.55	3.8	1.27	3.63	1.85	0.95	3.23	1.89
W6b7353|c0_g1_i1	1.34	1.76	1.57	1.39	1.87	1.59	2.96	2.19	2.58	3.38	3.01	2.76	2.04	1.78	1.65	2.34	3.1	1.84	2.51	1.84	1.78	0.96	2.06	2.57	1.63	1.8	3.09	1.12	2.05	1.44	2.56	2.01	2.95	2.91	2.26	2.75	1.43	2.81	1.73	7.41	1.68	2.85	2.77	2.46	1.94	2.98	2.73	2.45	4.05
W4a18458|c0_g1_i2	0.78	0.15	0	0.54	0.68	0.43	1.56	5	3.4	0.83	0.16	2.02	1.33	0.7	0.98	0	0	1.61	1.14	0	0	0	0	1.1	6.2	3.99	0.45	0.53	0.23	0.32	0	0.98	0	0.64	0	2.6	0	5.82	0	1.03	3.21	4.81	4.09	9.55	1.79	1.87	0.4	2.71	0.05
Contig23953	0.08	1.74	0	0.42	1.07	0.66	0.24	7.72	2.02	0.51	0.17	1.92	1.14	0.8	0	0	0	0.51	0.3	0	0.4	2.6	1.52	0.19	1.89	1.7	1.02	0.97	0.61	0.75	1.98	0.86	4.98	0.58	3.8	1.9	0.54	0	0.4	0.3	0.27	3.09	0.45	3.23	0	1.47	2.42	0.53	0.05
W6b656|c0_g1_i1	1.19	1.79	1.23	0.87	1.56	1.33	3.35	3.56	4.86	1.65	4.46	3.73	1.37	2.21	1.39	1.65	2.66	0.44	1.57	1.58	2.21	1.71	2.12	1.73	1.34	2.73	5.5	2.35	1.61	1.13	2.27	1.98	1.49	4.43	1.87	4.6	2.74	2.96	1.28	9.61	2.8	5.81	4.44	1.9	2.58	4.26	3.29	3.02	3.2
W7b22539|c0_g1_i3	0.57	7.45	5.09	1.21	1.44	3.16	4.08	4.14	11.86	3.57	9.18	6.07	2.08	2.39	1.59	6.11	9.53	5.58	0.77	3.8	2.09	2.87	0.87	9.24	5.8	2.78	5.84	1.03	2.6	5.46	1.75	3.8	4.93	7.76	4.94	5.52	1.69	7.42	2.13	4.32	6.84	4.02	2.81	12.85	20.1	3.91	4.34	6.88	4.39
W7b16049|c0_g1_i2	4.43	2.93	3.93	6.59	4.69	4.51	4.34	9.43	12.95	8.07	9.77	8.53	6.14	7.05	8.58	4.68	4.89	6.74	5.6	7.13	4.11	3.49	6.14	6.26	3.84	5.63	5.91	3.88	5.1	5.4	5.17	5.57	9.59	4.53	8.36	5.94	6.99	8.01	6.92	4.38	4.7	8.21	6.81	3.07	29.74	9.2	5.47	7.32	10.13
Contig43808	7.51	5.04	4.44	1.31	7.22	5.11	9.72	5.33	7.6	8.03	15.63	13.33	13.03	13.31	1.28	3.78	3.64	8.38	12.36	4	2.42	9.1	2.17	4.51	10.02	6.33	6.89	13.94	12.62	3.93	4.11	7.15	6.22	5.08	12.01	6.49	7.96	5.51	9.3	5.05	17.08	24	7.19	19.55	15.81	32.52	2.85	8.14	11.45
W6b26442|c0_g1_i1	0	0.14	0.25	0	0.13	0.11	0	1.22	6.15	2.5	16.37	4.48	0.11	0.79	0.26	0.43	3.39	0.61	0.36	0.68	1.33	0.33	0	0.52	0.53	0.14	1.14	0.13	0	1.06	0.16	0.63	0.35	2.42	0.43	1.6	1.77	1.71	0.92	11.23	0.32	2.08	0.41	1.24	0.62	2.43	1.52	1.82	5.89
W5c15575|c0_g3_i5	0.23	0.15	0.87	0.88	1.29	0.68	0.93	5.95	0.39	0.97	0.32	1.5	0.36	1.04	0.35	0.37	1.4	0.56	0.47	1.07	0.51	1.79	1.45	0.55	0.39	0.44	0.9	0.2	0.29	0.32	1.2	0.72	5.72	0.96	0.75	0.45	0.31	1.66	0.87	0.29	0.76	0.55	1.07	0.28	1.05	0.93	1	0.46	0.64
Contig32029	0.89	0.52	0	0.15	0.35	0.38	1.16	1.25	0.93	1.03	4.88	1.64	0.14	0.71	0.36	0.13	0.62	3.03	0.22	0.31	0.07	0.39	0.52	0.16	1.13	0.25	0.69	0.53	0.1	0.32	0.49	0.54	0.17	0.32	0.99	2.49	0.3	1.78	0.33	10.31	0.24	1.56	0.43	0.91	1.16	1.47	0.57	2.66	1.21
W6b18451|c0_g1_i2	2.2	1.89	3.14	2.38	4.97	2.91	9.49	8.13	4.7	14.64	9.71	9.31	3.96	3.56	2.72	2.01	3.34	5.72	2.85	2.24	2.46	3.18	2.3	4.33	4.26	4.45	5.11	3.6	2.42	2.65	6	3.54	2.54	9.66	9.45	8.54	4.72	4.62	2.23	13.15	3.63	8.63	8.76	10.44	8.28	7.48	5.27	5.75	6.53
W1a3460|c0_g1_i1	1.43	1.42	1.43	0.92	1.78	1.4	2.56	3	1.57	2.95	1.37	2.82	1.96	1.99	0.95	1.53	1.33	3.38	1.11	1.05	1.31	1.48	0.81	2.78	0.69	2.62	2.23	2.09	1.73	2.26	2.47	1.78	2.2	2.98	2.45	2.11	1.42	2.12	1.01	2.07	2.16	3.53	5.17	1.82	2.34	4.6	1.82	2.29	2.22
W6b14383|c0_g2_i3	0.12	0.12	0	0.1	0	0.07	0	10.07	3.42	9.74	75.12	16.68	3.42	0.32	0.11	1.14	1.54	1.35	0.29	1.09	0.1	0	0.12	0.28	0.6	0.23	22.16	0.5	0.53	0.61	0.65	1.84	0.56	0.49	0.35	6.34	0	10.68	2.8	9.99	5.67	6.67	0.82	12.7	0	11.74	3.06	19.17	3
Contig31219	2.85	2.53	1.52	1.86	2.11	2.17	3.36	5.67	3.05	5.6	8.67	6.06	3.22	3.49	1.79	2.1	2.98	3.61	3.06	2.57	2.06	2.46	1.05	4.97	2.09	5.3	4.91	4.19	2.01	2.38	3.8	3.05	2.22	5.68	4.57	3.03	3.41	2.74	3.23	10.41	6.82	3.21	6.76	6.88	6.6	4.74	3.42	3.62	4.3
W1a30675|c0_g2_i1	3.26	2.35	1.38	0.6	2.05	1.93	1.09	4.18	9.51	1.82	4.49	4.31	5.2	2.98	2.1	1.21	0.48	0.67	1.95	1.35	3.13	1.1	2.72	6.15	4.4	1.98	2.85	2.76	1.71	1.29	2.25	2.44	1.83	3.02	4.34	4.09	2.6	2.2	0.86	2.75	3.2	4.51	3.24	4.12	4.61	3.51	2.24	5.62	2.2
W6b15571|c0_g2_i3	0.3	0.1	0.39	0.04	0.26	0.22	1.85	4.32	4.36	7.39	18.49	6.18	0.54	0.31	0.22	1.3	1.8	17.13	0.06	0.52	0	1.32	0.88	1.52	0.07	0.95	1.21	0	0.41	0.82	0.44	1.55	0.16	2.05	4.37	4.92	0.73	0.84	0.99	27.2	0.33	0.91	3.31	2.58	7.81	5.24	0.58	6.44	3.55
Contig5469	0.55	0.36	0.71	1.43	1.36	0.88	2.16	5.03	0.82	14.34	12.59	8.13	2.47	1.44	0.9	3.8	2.34	7.26	0.34	2.64	0.34	0.71	1.31	3.12	1	1.13	4.09	0.35	0.65	1.6	3.7	2.06	1.01	2.78	0.62	12.65	1.9	3.35	7.12	6.75	2	1.16	1.27	9.94	2.88	3.72	3.97	7.73	4.93
Contig40060	1.57	0.2	0.67	0.14	1.37	0.79	9.82	8.85	19.25	22.99	94.19	26.67	0.57	1.03	0.51	8.08	7.82	55.37	0.38	0.18	0	8.38	9.22	5.63	0.23	2.38	4.44	0.09	1.48	5.23	1.67	5.93	0.78	11.55	12.98	20.73	1.6	4.28	2.2	24.69	1.59	7.7	12.55	7.84	25.75	20.72	8.67	31.2	13.31
Contig40059	0.15	0.49	0.31	0.4	0.53	0.38	4.02	9.17	15.49	11.47	66.53	18.24	1.23	2.82	1.09	3.91	4.57	24.9	0.31	0.23	0	3.69	7.13	1.37	0	1.45	1.82	0.47	0.72	2.24	2.64	3.19	1.04	4.69	5.43	14.01	1.08	4.71	3.09	15.28	1.38	1.64	7.87	3.97	29.02	19.74	4.39	17.07	8.62
W6b3711|c0_g1_i1	0	0	0	0	0	0	0	0	0	1.57	1.85	0.57	0	0	0	0	0	0	0	0	0	0	0	0	0	3.48	2.63	0	0	0	0	0.32	0	0	0	0	1.08	0	0	2.41	0	0	0	0	2.41	3.05	0	4.2	0
W7b10671|c1_g7_i7	0.12	0.35	0.1	0.21	0.37	0.23	0.73	0.6	1.26	2.05	1.39	1.07	0.14	0.86	0.43	0	0.06	0.12	2.43	0	2.43	0.33	0.47	0.21	0.39	0.11	0.76	0.92	2.29	0.62	0.8	0.7	1.28	0.99	0.59	0	0.88	0.27	0.52	0.04	0.33	1.87	0.58	9.95	11.28	2.44	0.16	4.85	0.62
W1a23174|c0_g1_i4	0.46	0.26	0.57	0	0.29	0.31	1.05	1.9	0.98	1.7	9.22	3.27	0.61	1.29	0.82	1.71	2.5	1.97	0.4	1.29	1.19	0.43	0.13	0.46	0.43	0.69	0.95	0.67	0.29	2.22	0.44	0.97	0.36	0	0.38	1.65	0.18	0.29	1.96	1.17	0.5	1.76	1.09	7.12	4.33	4.04	2.37	6.97	5.36
W4a9294|c0_g1_i1	0.14	0.28	0.24	0.98	1.12	0.55	1.56	1.05	0.28	1.01	0.45	0.85	1.1	0.89	0.51	0.41	0.14	0	1.21	0.98	0.93	0.47	0.7	0.83	2.57	0.13	0.96	0.12	0.11	0.15	0.31	0.66	0.56	1.31	0.55	0.12	0.94	1.26	0.18	0.31	0.62	1.4	1.77	2.05	1.04	1.28	0.37	1.32	1.41
W4a24392|c0_g1_i2	0.6	0.25	0.73	0.44	0.97	0.6	0.43	1.12	0.93	1.21	1.42	0.97	0.33	0.68	0.38	0.16	0.68	0.7	0.31	0.29	0.28	1.03	0.75	0.4	2.96	0.65	0.41	0.51	0.38	0.78	2.91	0.77	0.73	0.96	1.98	1.21	0.91	0.53	0.84	1.51	0.28	0.84	0.47	1.74	0.44	1.91	1.42	1.08	0.9
Contig1389	20.05	13.99	13.37	18.29	15.74	16.29	15.23	18.21	23.83	16.87	14.1	19.31	20.53	13.87	24.43	16.71	15	19.28	17.81	13.75	16.67	17.86	10.72	14.46	20.31	21.28	13.72	15.08	16.23	18.55	13.53	16.83	17.36	26.85	21.91	17.76	18.72	14.51	14.98	14.91	14.92	23.17	22.97	20.75	16.13	17.81	18.85	21.05	23.08
W6b7156|c0_g1_i2	1.96	3.18	1.61	1.91	1.93	2.12	3.37	3.84	7.55	3.78	1.57	3.62	1.65	2.23	1.38	2.4	1.41	1.76	3.39	1.63	1.16	0.96	1.39	3.95	3.25	2.41	3.74	1.31	1.67	2	5.6	2.28	1.43	4.69	3.68	2.57	2.21	2.67	1.81	7.8	2.26	4.74	3.74	3.05	4.12	4.3	4.18	6.16	3.41
W7b23|c0_g1_i5	0	0.74	0.3	0.26	0.21	0.3	0.41	3.59	2.57	0.63	0	1.25	0.46	0.68	0.26	0.06	0	0.37	0.29	0	0.43	0.52	0.06	0.14	0.55	0.89	0.46	0.35	0.31	0.12	1.36	0.38	0.18	0.72	0.69	1.77	2.04	0.1	0.29	0.43	0.83	0.25	0.98	4.04	10.57	5.74	2.73	2.23	0.45
Contig37308	0.35	0	0	0.2	0.51	0.21	1.52	1.73	4.86	2.6	2.56	2.44	0	0.62	0.21	0.22	0.23	4.46	0.28	0.67	0.19	1.8	1.72	0.41	0.17	0.66	1.13	0.4	0	0.72	0.26	0.74	0	1.79	0.45	1.07	2.17	0.83	0.58	10.5	0.76	2.13	5.16	4.07	13.75	5.42	4.36	10.71	3.91
Contig11888	0	0	0.19	0	0	0.04	40.85	0	0	0	0	6.84	0	0.07	2	0	0	0	0.09	0.51	0	1.72	0	0.35	0.05	0	1.3	0	0.33	0.08	0.16	0.35	0.12	0	0	0	0.3	0.13	0	65.69	0	0	0	0.45	0.16	2.12	10.48	27.32	113.51
W1a3419|c0_g1_i3	3.69	1.26	1.45	1.53	5.08	2.6	1.46	5.04	6.3	3.62	2.08	4.73	1.43	5.61	1.3	3.68	0.77	4.19	4.47	0.53	2.51	2.95	1.43	2.51	3.83	6.83	4.37	4.42	2.57	4.23	1.69	3.12	0.42	4.4	11.38	2.68	2.85	4.09	5.04	1.19	3.99	5.17	5.29	12.43	3.52	6.2	8.39	11.1	5.57
W7b26484|c1_g3_i5	0.33	0.11	0	0	0	0.09	0.33	5.63	1.4	3.78	18.17	5.55	0.76	0.68	0.49	2.61	3.36	2.02	0.26	1.5	0.53	0.24	0.21	0.25	0.55	1.65	2.31	0.74	0.08	4.11	0.12	1.18	0.6	0.89	0.53	3.99	0.29	2.03	2.83	2.97	0.71	4.42	2.4	17.62	14.04	7.48	2.1	25.34	6.31
W4a31428|c0_g1_i1	0.18	0.34	0	0.3	0	0.16	0.53	0	0	1.09	0.37	0.36	0	0	0	0.17	0.87	1.27	0	0.4	0.14	0	0.17	0	0.51	0.66	0.17	0.45	0.13	0	0	0.26	0	0.72	0	0.15	0.23	0.16	0.22	0.78	0	0.25	0	0.21	0	0	0.23	0.64	0.29
Contig5578	0.61	0.49	0.88	0.49	0.89	0.67	2.61	1.68	2.38	2.69	4.54	2.83	0.79	0.82	0.96	2.31	1.63	2.69	1.68	1.12	1.72	1.01	1.1	2.09	1.07	2.28	2.57	1.26	1.41	0.52	0.73	1.46	4.68	2.35	2.88	1.15	2.17	0.45	0.57	0.83	0.89	1	10.09	2.95	3.99	1.91	1.97	1.92	4.07
Contig6563	0	0	0	0	0	0	0.38	7.62	2.73	3.9	27.98	8.03	0.29	0.89	0.67	3.24	5.37	1.29	0.46	2.44	0	0	0.37	0.29	1.09	2.14	0.85	0.53	0	2.81	0.41	1.22	0.59	1.03	4.49	5.64	0	2.67	0.93	3.41	0.41	5.27	3.97	16.54	11.35	12.74	2.9	22.86	14.2
Contig45766	0.32	0.15	0	0.21	0.42	0.22	1.83	2.35	2.05	0.85	4.24	1.96	0.19	0.14	0.64	0.23	0.79	1.07	0.68	1.37	0.13	0.17	0.08	0.28	2.82	0.98	1.15	1.08	0.35	3.25	0.88	0.86	0.25	0.9	0.93	0.73	0.32	0.78	1.08	1.29	0.52	0.45	0	2.77	3.89	1.67	0.41	5.76	1.74
W4a11906|c0_g1_i1	0.56	0	0	0.12	0.36	0.21	0.98	0.23	3.04	0.12	1.89	1.04	0.76	0.5	0.62	0.67	0.14	0	0.51	0	0.23	0.46	0.27	0.16	2.12	0.79	0	1.3	0.1	1.28	0.46	0.55	0.55	0.43	0.14	0.46	0.37	0	1.73	1.54	0.15	0.2	0	0.33	2.47	2.3	0.36	0.94	2.45
W6b12205|c0_g1_i3	2.66	2.04	2.39	1.58	1.52	2.04	3.57	2.25	3.03	2.55	2.57	2.8	2.31	2.44	3.16	3.05	2.93	1.72	2.56	4.2	3.16	2.97	2.37	5.11	1.09	1.58	2.11	1.78	1.27	2.31	1.92	2.53	1.27	3.05	2.62	2.28	1.16	2.72	3.64	6.12	1.38	2.56	1.81	2.67	1.57	1.9	2.66	3.4	5.23
W1a10294|c0_g1_i8	0.72	0.87	0.66	0.46	0.49	0.64	0.8	2.59	0.45	2.76	1.99	2.05	1.48	0.69	1.54	0.99	1.88	1.59	0.87	0.91	0.63	1.17	1.12	0.06	1.11	0.78	1.25	1.66	1.71	1.84	1.49	1.2	0.73	0.52	0.82	0.64	0.95	1.72	1.44	2.7	1.55	1.26	0.73	1.27	1.44	1.59	1.43	1.75	2.24
W1a1100|c0_g2_i1	0.47	0	0	0.23	0.09	0.16	0	0	0	10.84	0	2.86	0.45	0	0.75	0	0	0	1.84	0	0	0.63	0.36	0	0	0	0	0	0	0.53	4.49	0.48	0.41	0	0.05	0	0.28	21.1	1.94	0	0	0	0	0	0	1.02	0	48.22	9.07
W6b24237|c0_g1_i1	0.95	0.81	1.9	0.41	1.79	1.17	1.47	3.15	2.34	2.48	2.41	2.06	3.71	0.7	0.99	0.5	1.83	3.9	1.72	1.87	1.63	1.15	0.72	0.31	0.76	0.99	3.5	0.53	1.02	1.18	1.73	1.51	0.94	1.29	1.58	1.31	0.91	1.91	1.37	5.73	1.2	1.47	0.8	0.69	1.15	2.04	0.74	3.25	2.16
W6b6095|c0_g9_i1	0.68	0.2	0.06	0.06	0.06	0.21	4.13	1.28	0.94	2.83	13.72	4.01	0.53	0.3	0.06	0.46	1.28	2.52	0.66	3.27	0.28	0.45	0.93	0	0.39	0.58	0.65	1.55	0.45	0.83	0.9	0.85	0.42	1.32	0.46	0.56	1.08	0.48	1.26	21.07	0.44	0.19	0.28	1.79	3.18	1.01	0.87	8.45	8.49
W6b15932|c0_g2_i1	0.17	0.97	0	0	0	0.23	0.33	2.05	0	7.27	9.91	3.58	0	0	0.3	1.92	1.16	3.09	0	0.96	0.14	0.37	0.16	1.17	10.11	0	0.32	0.28	0.74	1.7	0	1.18	0	4.09	0.48	4.3	0	1.33	3.51	4.17	0.18	0	0.46	0.2	0	7.72	0	0.05	14.36
W7b15882|c0_g1_i1	0.38	0.36	0.48	0	0.66	0.38	1.13	0.62	0.37	1.34	0.39	0.91	0.73	0.67	0.67	0.72	0.37	0	0.23	1.51	0.62	0	0	2.42	0.27	0	1.09	0.32	0.28	0.19	1.03	0.59	0	0.19	3.1	0.63	0.5	0	0.47	0.83	0.81	0.53	0	0	2.35	0.28	0.72	0.58	1.56
Contig41071	0.76	1	0.84	0.75	0.57	0.78	2.11	2.05	4.24	4.63	5.38	3.6	0.51	0.63	1.26	1.51	2.32	3.58	2.37	2.05	1.55	1.43	1.22	1.52	1.18	2.67	1.41	1.47	1.09	1.05	0.36	1.54	3.01	3.72	2.94	1.17	1.94	0.77	0.4	0.88	1.23	2.21	10.17	2.73	5.08	3.16	2.86	2.01	4.19
W5c7700|c0_g2_i1	10.15	5.49	8.72	5.62	1.06	6.21	6.49	68.19	40.97	5.06	2.54	22.51	3.15	17.72	2.54	9.73	3.24	1.05	27.35	1.4	12.79	51.25	0.4	2.85	40.02	41.69	9.4	5.16	3.77	11.8	10.5	13.46	64.53	15.15	15.74	7.94	0.81	10.28	12.31	3.14	15.83	9.96	3.36	22.4	65.48	14.56	11.48	5.18	1.28
W1a24099|c0_g1_i1	0	0	0	0	0	0	0	0.33	0	1.77	1.66	0.94	0	0	0	1.34	0	1.44	0	0.46	0	0	0.78	2.33	0	0	0	0	0	0	0	0.33	0	0	0	0.66	0	4.6	0.99	0	1.3	0.56	0	5.02	0	0.89	3.07	2.07	0
W1a23343|c0_g1_i6	0.3	0.38	0.14	0.18	0.36	0.27	0.21	0.42	0.36	0.41	0.29	0.5	0.48	0.43	0.45	0.38	0.37	0.47	0.14	0.24	0.3	0.28	0.29	0.3	0.25	0.41	0.55	0.56	0.22	0.35	0.71	0.38	0.31	0.35	0.47	0.4	0.18	0.33	0.26	0.39	0.52	0.52	0.51	0.55	0.36	0.48	0.74	0.75	0.67
Contig8131	1.27	0.75	0.73	0.24	0.37	0.67	6.78	1.74	0.98	3.27	4.43	3.74	1.04	1.32	2.65	3.66	4.02	3.28	1.29	1.3	1.97	2.17	1.31	2.07	0.61	1.27	1.77	0.66	0.26	3.68	1.01	1.86	1.33	2.24	1.37	2.06	1.31	3.77	6.56	1.04	0.61	1.39	0.78	10.6	0.59	6.02	3.45	10.42	5.83
W2b23970|c0_g1_i2	0.19	0.03	0.12	0.09	0.07	0.1	1.63	3.37	0.16	4.16	5.44	2.54	0.67	0.56	2.33	0.7	1.73	0.64	0.59	0.62	0.13	0.51	0.82	0.86	0.73	0.41	2.1	0.62	0.44	1.97	0.81	0.91	0.59	0.5	0.39	2.83	0.87	0.89	1.61	1.1	1.68	0.76	0.3	3	1.05	1.91	1.82	2.02	0.9
W5c25370|c0_g2_i1	0	0.67	0.6	0	0.91	0.44	0	1.57	4.3	0.77	0.54	1.29	1.21	0.62	0	0	1.73	0.36	0.42	0	0.14	2.1	0.17	0.41	1.63	1.81	1.34	1.18	0.77	0.71	0	0.77	3.12	0.36	0.5	0.87	0.46	0.46	0.43	0.51	1.51	1.46	0.72	4.17	1.27	0.26	0	2.43	1.09
W1a12280|c0_g1_i1	0	0.4	0	0	0	0.08	0.28	0.92	0.69	0.5	0.87	0.79	0.33	0.75	0	0	0	0.29	1.19	0.32	0.69	0.15	0.55	0	0.71	1.19	0.54	0.83	0.52	0	0	0.42	0.44	2.28	0.27	0.12	0.37	0	0	0.21	1.66	0.59	0.77	1	1.31	1.04	0.54	0.2	0.32
W5c27586|c0_g1_i2	1.12	2.12	1.21	1.87	1.76	1.62	4.18	1.5	4.7	3.23	3.28	3.09	1.13	5.08	2.59	2.88	1.91	1.65	3	5.1	1.5	3.7	2.23	0.79	1.66	2.02	2.41	1.67	2.03	2.44	2.13	2.42	9.62	2.53	3.02	2.83	1.98	1.47	3.1	1.45	1.46	1.85	1.82	3.54	1.78	2.44	2.93	4.06	3.34
W4a16195|c0_g1_i1	0.19	0.3	0.23	1.04	0.47	0.45	2.3	1.7	1.62	4.61	2.56	2.31	1.39	0.31	0.35	0.6	0.19	2.77	0.66	5.77	1.63	1.15	1.98	0.68	2.73	1.22	0.75	1.81	0.9	3.1	0.39	1.49	2.13	1.71	0.6	1.78	1.14	1.87	5.25	4.82	1.27	0.71	0.27	0.51	2.47	2.04	2.35	1.8	15.36
W4a16195|c0_g1_i2	0.12	0.26	0.73	0.77	0.34	0.45	1.63	1.44	1.23	2.63	2.8	1.76	0.75	0.31	0.28	0.3	0.04	0.72	0.71	3.93	0.67	1.62	1.56	0.68	3.17	0.55	0.71	1.45	0.69	2.54	0.56	1.12	1.91	1.83	0.53	1.68	0.98	1.21	4.62	3.55	1.05	0.38	0.11	0.37	2.39	0.99	2.3	1.56	11.45
Contig10301	0.59	0.18	0.51	0.35	0.19	0.37	7.82	4.48	1.51	3.47	31.52	8.84	2.16	1.72	1.69	3.56	1.85	3.56	2.21	6.35	1.03	0.69	2.69	2.08	1.45	1.65	3.26	0.85	0.96	3.67	1.96	2.28	1.28	3.87	3.24	2.72	3.84	1.91	2.39	8.75	4.66	1.4	1.43	5.12	16.53	7.1	5.58	13.03	39.85
Contig8063	0.04	0.23	0.6	1.21	0.2	0.46	0.16	7.75	9.1	3.25	0.81	3.52	3.28	3.18	4.54	0.15	0.85	0.08	0.19	0.04	3.11	0.21	0.34	7.31	0.7	5.84	1.91	0.23	0.14	0.32	4.53	1.95	0.91	0.79	0.75	0.61	1.03	9.79	0.05	1.03	1.14	1.31	0.8	25.88	0.73	0.93	0.5	0.61	5.65
W4a27689|c0_g1_i2	2.26	3.4	2.59	6.81	5.45	4.1	3.83	11.18	3.92	6.22	5.99	5.76	7.33	3.94	6.51	6.28	3.13	5.91	6.63	2.26	2.23	1.86	1.33	8.16	7.89	6.5	14.04	6.1	4.96	2.07	3.23	5.28	3.01	3.85	3.61	8.82	7.12	2.14	3.19	8.91	10.59	3.82	3.98	4.55	6.08	6.17	4.04	4	3.5
W5c4591|c0_g1_i2	0.68	0.06	0.11	0.32	0.49	0.33	1.05	0.1	0.25	0.55	1.49	0.75	1.01	1.16	0	0.54	0.06	0.7	1.36	0.57	0.76	0.41	0.12	0	0.18	1	0.96	0.11	0.69	0.13	0.68	0.55	0.97	0.32	0.06	0.88	0.08	0.11	0.08	0.73	0.34	1.31	1.46	0.45	0.65	2.23	0.8	0.59	0.19
Contig5753	0	0	0	0	0	0	2.69	4.11	0.92	4	13.87	7.71	2.84	1.24	0.83	3.95	3.61	13.35	0.1	1.21	0.93	0.6	0.78	2.12	0.85	0.48	3.21	0.32	0.44	12.87	0.46	2.64	1.31	0.65	0.65	4.31	0.67	2.99	6.09	3.93	3.19	0.94	0.35	9.84	4.6	10.56	4.76	12.89	3.23
W4a7461|c0_g2_i3	0	0.93	0.14	0	0.28	0.27	0.32	0.92	2.53	0.85	0	0.77	1.12	0.43	0.14	0.46	0	0.66	0.39	0	0.13	0	0.31	0.19	1.62	0.61	1.23	0.14	0.24	0.49	0.53	0.46	0.12	0.65	0.46	0.93	0	0.99	0	0.59	0.69	0.9	0.22	1.92	0.5	2.39	0.41	0.76	0.74
W5c20558|c0_g1_i1	1.4	0.3	0	1.14	0.41	0.65	0.47	1.15	1.92	2.56	0.24	1.15	0.42	2.01	0.28	0	0.46	1.12	0.66	0	0.57	0.94	0.08	1.91	3.03	0.44	2.03	0.79	0.87	0.55	1.37	0.92	6.99	1.51	0.6	0.78	0.31	0.97	0	0.17	0.67	1.42	0.32	1.4	0.89	1.16	2.5	0.54	1.73
Contig36364	0.22	0.07	0	0.12	0.13	0.11	2.37	24.84	5.46	17.58	78.47	24.9	1.9	3.33	3.96	9.77	18.76	7.29	1.81	6.96	0.77	0.26	1.29	1.96	2.43	5.4	7.4	2.6	0.32	12.54	2.59	4.81	2.34	2.87	5.07	13.24	1.02	6.29	10.36	11.9	2.44	12.91	11.67	69.59	48.27	34.24	13.04	82.66	31.28
W1a10781|c0_g1_i1	0	0	0	0	0	0	0.27	2.22	0	5.78	9.32	3.93	0.42	0.96	0.48	8.04	0.67	1.39	0.82	0.47	1.22	0.89	0	0.32	0.59	0.38	9.01	0.46	0.5	4.42	1.19	1.7	0	0	0.26	3.04	0.72	7.09	30.48	1.79	0.88	0	0	7.79	0	1.01	6.09	10.05	3.81
Contig33609	0.63	0	0.17	0.17	0.21	0.24	1.36	2.23	1.35	3.33	1.27	1.96	1.24	0.3	0.65	0.84	0.34	0.15	1.06	0.89	1.59	0.21	1.62	2.04	1.16	1.65	3.51	1.15	1.26	0.74	2.88	1.23	1.9	1.94	1.65	0.77	0.45	0.91	0.42	4.61	1.1	1.29	0.54	3.32	3.69	1.09	4.43	4.6	5.82
Contig36398	0.43	0.84	0.37	0.52	0.61	0.56	3.52	6.47	0.32	9.13	0.96	3.62	0.63	0.68	1.16	0.42	3.3	1.73	3.43	1.49	1.07	2.8	0.58	0.32	1.65	1.28	1.78	1.7	2.34	3.15	2.15	1.67	3.31	1.22	0.58	0.63	1.66	3.13	2.02	4.08	2.12	1.83	1.05	1.43	1.3	6.49	8.72	1.87	4.21
W3d7712|c0_g1_i4	0.55	0.53	0.57	0.19	0.1	0.39	0	4.69	1.09	4	5.95	2.81	0.94	1.56	2.55	2	2.52	0	1.33	0.76	0.36	0.48	2.58	0.77	1.9	3.53	1.91	0.93	0.9	0.78	0.97	1.41	1.2	1.01	0.11	1.19	0.58	1.85	9.78	1.37	4.04	0.62	1.82	8.16	0.69	1.48	2.4	6.67	1.16
W4a7492|c0_g1_i4	0.12	0.19	0.1	0.24	0.1	0.15	1.34	3.2	0.54	3.36	1.48	1.73	0.92	0.21	0.35	0.41	5.61	1.78	0.24	1.35	0.52	0.22	0.96	0.74	3.35	0.78	0.42	0.4	0.53	0.84	0.3	1.05	0.4	2.01	0.57	1.08	0.52	0.49	0.54	3.33	1.11	1.27	1.3	0.94	0.82	2.76	2.78	1.36	1.25
Contig15721	0.77	0.94	0.86	1.06	0.87	0.9	1.6	0.95	1.11	1.29	0.74	1.18	1.45	1.13	0.72	1.19	1.32	1.07	1.54	0.98	0.9	0.98	1.91	1.24	0.88	1.08	1.54	0.9	0.83	0.85	1.1	1.14	0.66	1.4	1.09	1.24	0.85	1.24	1.16	0.84	0.88	1.51	1.43	1.69	0.93	1.21	1.57	1.42	2.98
W4a24009|c0_g1_i4	0.09	0.45	0.8	0	0.08	0.28	0.84	0.84	0.74	0.66	0.39	0.68	0.87	0.83	0.25	1.16	0.19	0.77	0.11	0.11	0.69	0.82	0.73	0.76	2.02	0.35	0.9	0.63	0.35	0.28	0.41	0.64	0.29	1.24	0.45	0.23	1.11	0.91	0.12	0.96	0.71	0.26	0.13	0.78	0.87	0.83	0.48	1.28	0.74
W4a17632|c0_g1_i4	0.54	0.52	0.66	0.33	0.3	0.47	0.58	0.98	1.07	0.72	0.72	0.75	0.27	0.89	0.28	1.22	0.69	0.99	0.84	0.49	0.35	0.59	0.38	1.26	1.31	0.62	1.27	0.56	0.72	0.91	0.34	0.74	0.72	1.54	0.52	0.77	0.56	0.89	0.29	0.63	0.42	0.92	0.85	0.79	0.56	0.69	0.4	0.87	0.91
W1a29213|c0_g1_i1	0	0	0	0	0	0	0.23	1.16	0	1.57	0.25	0.97	0.27	0.21	0.63	0.68	2.23	0.48	0.43	0	0.29	0	0.23	0.55	0.34	0.67	17.8	0.7	1.48	1.8	0	1.51	0.92	0	0.23	2.06	0.31	1.78	0.73	1.04	0.25	1.65	0.32	0.56	0.49	0.18	8.46	0.16	0.82
W7b21931|c0_g1_i1	0.59	0.5	0.54	0.66	0.82	0.62	1.39	2.31	0.93	1.7	0.44	1.34	0.35	1.46	0.12	1.33	1.49	1.36	1.22	1.56	1.37	1.07	0.78	2.44	0.53	0.86	1.64	1.32	1.96	1.81	2.37	1.32	0.84	1.85	2.83	1.07	2.17	1.61	0.6	1.02	0.41	0.54	1.39	2.67	6.94	1.19	1.7	1.78	2.2
Contig41048	0	0	0	0	0	0	1.06	1.16	0.53	0.79	2.22	1.15	2.34	2.05	0	1.7	17.04	0.91	0.43	0.81	0.15	0.39	0.52	0.93	0.26	0.75	3.76	1.05	1.05	1.26	0	1.86	0.42	1.9	0.69	0.89	1.65	1.1	0.44	0.2	0.38	1.37	1.47	4.04	3.69	3.05	1.14	4	0.65
W1a14241|c0_g8_i1	0	0	0.08	0	0.17	0.05	0	0.16	0	1.94	6.91	2.69	5.3	7.84	6.89	1.9	2.46	0.41	0	2.95	0.65	6.73	1.06	0.23	0.64	0.37	0	1.26	0	0.4	0.22	2.07	0.77	1.62	0.58	0.66	0.13	0.44	3.67	0	3.75	0.28	3.96	0.71	0.62	4.73	9.03	4.52	2.49
Contig39515	0.4	0.14	0.21	0.15	0.24	0.23	4.26	10.61	0.34	5.49	8.02	4.87	2.62	4.75	0.86	4.68	3.61	2.17	1.14	2.64	1.42	0.63	4.1	5.77	3.71	2.06	9.2	3.19	1.1	7.71	3	3.39	1.9	0.53	0.53	11.87	1.65	1.74	6.47	1.55	7.92	0.97	1.26	17.09	4.41	1.89	6.59	13.58	2.76
W3d25451|c0_g5_i1	0.16	0.46	0	0	0.55	0.23	0.95	8.1	0	1.7	0.66	2.15	4.69	1.28	0.99	1.37	0	0	0	0	0.91	0	2.49	0.74	12.75	0.3	1.38	4.44	11.58	0	1.4	2.33	0.5	1.14	0	0.26	0.21	12.44	0	0	3.45	0.45	0.88	10.11	0.33	11.18	9.61	5.3	0.47
W1a16383|c1_g3_i3	0	0.14	0	0	0	0.03	0.15	1.46	0	3.16	11.43	4.94	12.06	9.89	0.79	2.55	5.46	3.36	0.54	1.36	0	0.49	1.45	0.87	12.51	7.43	6.71	0.88	0.33	2.26	0.33	3.65	0.69	1.66	1.29	3.33	0.59	6.84	2.2	1.42	0.96	0.83	1.43	12.43	5.39	9.29	4.76	1.24	4.61
W7b18875|c0_g1_i1	2.59	3.94	3.58	2.35	4.03	3.3	5.3	8.23	3.28	3.63	5.63	4.94	5	4.89	2.59	7.87	3.34	7.62	10.24	2.91	5.79	1.94	1.07	6.42	4.78	6.48	3.98	5.03	6.13	6.2	7.14	5.23	2.76	5.61	4.39	4.8	5.06	6.29	10.61	2.17	3	3.88	2.38	6.8	16.05	5.42	5.54	5.3	6.33
W7b22743|c0_g1_i1	4.85	5.96	4.93	3.61	4.37	4.74	8.75	8.54	7.34	9.92	5.55	7.67	7.82	6.59	6.8	8.96	9.31	10.66	6.65	7.08	8.61	9.14	5.73	8.26	6.84	7.61	8.6	6.69	5.26	9.49	8.09	7.8	4.19	7.79	6.6	7.4	7.58	7.08	6.45	8.18	5.12	8.4	6.91	8.56	10.8	11.49	9.26	10.44	9.22
W3d23512|c0_g1_i1	1.39	0.9	1.85	1.75	2.37	1.65	3.36	1.44	3.5	2.86	1.82	2.52	3.42	4.82	2.18	2.37	2.75	4.69	1.07	3.69	2.51	3.2	7.25	1.06	0.27	1.35	0.97	1.58	0.81	1.45	0.96	2.44	1.2	1.05	2.35	2.05	1.62	2.5	5.1	3.07	2.3	2.21	2.9	1.51	2.84	2.15	5.01	3.93	6.22
W7b16667|c0_g1_i7	0	1.34	0.67	0.04	1.53	0.72	1.75	3.94	0.05	4.89	2.07	2.16	0.47	0.62	0.49	2.08	0.97	2.14	0.9	0.53	1.32	1.92	1.22	0.11	1.23	0.87	0.8	1.6	2.13	3.48	1.93	1.31	1.23	1.13	1.03	1.77	0.74	1.39	1.66	0.75	1.8	0.65	2.16	1.16	5.09	3.45	2.49	2.06	2.11
Contig6930	2.64	0	0	0.91	2.3	1.17	2.77	6.08	0.52	37.37	1.79	9.3	1.85	6.12	12.03	7.6	1.84	7.76	0	1.21	0.65	7.1	1.68	0.62	4.01	3.75	5.99	1.01	2.35	4.85	2.03	3.81	2.89	3.38	6.91	9.79	4.21	3.99	4.25	1.85	2.43	3.7	0.55	7.92	15.94	8.29	26.14	30.64	13.66
W5c4632|c0_g1_i6	1.78	1.57	1.39	2.27	2.56	1.91	2.93	4.83	2.45	1.65	2.66	2.71	2.04	3.72	0.9	1.26	1.85	4.3	1.6	1.24	1.9	2.89	2.27	2.44	4.3	4.17	3.21	2.36	2.58	1.73	3.83	2.56	4.17	2.69	1.27	1.42	2.98	2.06	0.96	2.33	3.35	3.68	3.3	2.69	1.13	1.27	1.99	3.53	2.36
W7b11648|c1_g2_i1	0.17	0	0	0	0	0.03	0	0	0.5	0.3	0	0.16	0.13	0.3	0	0	0	0.35	0.41	0	0	0	0	0	0.98	0	0	0	0.25	0.17	0	0.14	0	0	0.65	0	0	0.45	0	0	0.18	0.24	0	0	1.93	0	0	1.09	0
W6b15932|c0_g2_i3	0	0	0	0	0	0	0.18	1.59	0	0.62	2.93	1.04	2.04	1.41	0.16	0.34	1.57	0.18	0.85	0	0	0.19	0.17	0.21	1.9	1.16	1.69	0.45	0.26	0.54	0	0.69	0	0.18	0.34	0.29	0.23	0.47	0.87	2.59	0	1.48	0.97	2.11	0.91	2.1	0.45	0.3	0.47
Contig39516	0.08	0.07	0.09	0.09	0.09	0.08	1.73	3.72	0.22	4.77	3.23	2.33	1.11	1.81	0.52	2.51	2.26	1.04	0.58	0.98	0.49	0.25	1.72	1.62	1.09	1.17	3.37	1.43	0.75	4.26	0.75	1.46	0.75	0.49	0.24	7.08	0.9	0.51	3.14	0.78	3.43	0.63	0.59	7.51	5.97	1.2	2.23	6.39	1.5
W3d17558|c0_g1_i1	0	0	0.2	0	0	0.04	1.39	0	0.58	0.31	1.21	0.58	0.81	0	0.73	0	1.04	0	0	1.2	0.57	0	1.02	0.54	0	0.66	0	0	0	0	1.15	0.41	0	0	0	0.39	0.93	1.96	0.29	0.34	0.13	0	0	0	0.24	0	1.05	0.03	0
Contig19420	0.72	0.93	1.23	0.41	2.5	1.16	5.62	6.39	9.59	6.49	5.62	7.03	3.16	2.88	4.06	7.34	2.98	0.25	19.9	4.53	2.55	1.84	8.43	4.48	10.8	3.4	3.92	5.77	6.84	4.88	5	5.42	2.06	7.1	12.29	4.88	5.72	1.49	7.85	3.52	16.07	4.36	2.97	7.32	16.81	10.91	14	30.54	38.82
W1a16383|c1_g2_i1	0.26	0.88	0.11	0	0	0.25	0.52	3.76	1.16	3.84	25.38	6.61	3.65	3.15	0.58	3.89	9.64	2.29	1.11	0.3	0.43	0	2.43	0.31	22.29	3.09	13.37	6.09	2.62	3.47	0.14	4.15	4.7	2.54	3.55	6.1	0.69	1.86	26.54	2.21	2.98	1.65	0.9	8.78	3.67	6.84	7.56	0.95	4.12
W1a19987|c0_g1_i6	1.01	0.24	1.73	1.09	1.86	1.19	4.52	20.77	0	15.89	85.97	25.42	4.3	18.83	6.52	14.96	0.75	1.04	6.26	16.02	4.94	2.07	2.22	3.97	6	9.41	13.11	6.82	7.76	9.75	5.54	7.38	15.92	1.67	22.67	21.68	14.2	4.81	18.06	4.63	10.36	5.64	3.3	31.69	29.19	16.74	20.54	41.66	10.88
W1a19987|c0_g1_i1	1.39	0.12	4.9	1.54	1.1	1.81	3.42	21.45	0.13	15.11	91.52	27.34	5.51	17.96	8.94	18.11	2.53	1.96	6.77	17.75	6.64	4.04	2.48	3.56	4.76	11.28	13.09	5.69	9.61	13.31	6.42	8.44	15.84	1.94	28.13	21.43	16.5	5.52	20.08	5.41	9.34	5.33	1.75	32.84	33.51	19.52	24.6	41.91	11.47
Contig40307	1.35	0.15	0.17	0.3	0.2	0.43	2.24	3.15	1.26	1.79	1.45	1.82	2.58	0.83	1.24	2.82	0.69	0.68	0.94	1.55	0.41	2	0.42	0.77	1.65	0.51	1.57	1.18	1.15	2.37	0.98	1.28	0.94	1.27	1.69	3.83	2.26	0.41	0.62	1.74	1.05	2.5	2.56	1.02	5.4	1.85	2.14	4.74	4.87
Contig12589	0.29	0	0.2	0.4	0.1	0.2	1.46	3.12	1.91	3.79	2.5	2.79	3.99	0.1	0.31	3.25	1.69	0.42	2.13	2.75	0.76	0.83	2.97	1.57	0.8	0.55	2.82	2.47	0.43	1.91	3.28	1.74	1.05	3.4	1.81	0.53	2.33	1.66	4.05	1.38	3.16	1.15	0.32	3.57	4.44	6.11	6.08	2.83	11.73
Contig17128	0.25	0.83	0.21	0	0	0.26	0.12	0.71	0.37	0.33	0.77	0.4	0.19	0.77	0	0	0.25	0.51	0.3	0	0	1.08	0.36	0.14	1.24	0	0	0.31	0.27	2.63	0.14	0.43	0.29	0.13	0.24	0.1	0	0.22	1.22	0.09	0.53	0.52	0.68	1.48	2.05	1.1	0.16	0.34	0.12
Contig14217	0	0.14	0.45	0.21	0	0.16	0.62	0.12	1.18	2.04	0.35	0.74	1.07	0.42	0.47	0.59	1.24	3.93	0.23	0.33	0.47	0.42	0.37	0.22	0.17	0.09	0.37	0.44	0.11	0.53	0.05	0.61	0.15	0	0	1.87	0.19	0.08	0.24	1.58	0.41	0.33	0.39	0.17	1.14	2.49	0.49	0.15	1.04
W6b24800|c0_g1_i1	0	0	0.15	0	0.62	0.16	0.36	0.59	0	0.32	0.94	0.43	0.14	0	0	0.69	1.79	0	0.44	1.23	0.15	0	0	0.21	0	0.34	0	0.61	0.53	0.91	0.39	0.39	0.28	0	0.35	0.15	0.24	0	0.44	2.64	0.58	0	0	0.22	0.37	0.27	0	0.35	3.45
Contig44542	0.28	0.27	0.8	0.73	1.75	0.77	7.28	1.5	0.69	4.82	5.36	3.71	2.17	3.79	1.25	1.79	2.09	0.87	4.14	1.93	3.78	1.69	4.8	1.97	0.88	3.71	2.03	3.72	1.14	1.62	1.85	2.38	3.39	5.06	2.72	1.36	0.62	0.66	1.91	1.93	1.47	1.9	1.16	2.52	5.83	2.65	5.64	4.54	6.52
W2b24426|c0_g1_i6	0	0	0	0	0	0	0.36	1.91	0.18	1.11	10.82	2.84	2.5	1.43	4.79	0.69	0.89	0.74	1.95	0	0	0	0	0.21	5.94	0.34	4.66	0.15	0	0.91	0.39	1.35	0.28	0.73	1.56	0.3	0.24	1.75	0	1.45	0.39	2.76	1.48	4.5	1.12	2.94	1.61	0.55	2.37
W7b10677|c0_g1_i1	3.05	2.67	7.5	1.77	2.22	3.44	5.96	4.21	4.79	3.81	6.56	4.64	3.55	4.59	2.56	4.06	4.66	3.96	4.63	6.7	2.45	1.24	5.45	4.3	2.85	6.02	3.58	3.67	3.73	5.23	5.64	4.15	5.24	2.02	2.45	7.55	4.89	5.23	5.27	1.92	2.76	5.42	2.21	2.46	21.59	3.18	5.03	6.2	8.96
W6b15932|c0_g2_i5	0	0	0	0	0	0	0	5	0	0.52	14.34	3.97	2.59	1.05	0.18	1.69	4.31	0.2	0	0	0.32	0.43	1.35	2.3	3.26	7.43	6.44	0	0	0.6	0	1.69	0	1.2	0	8.34	0.26	0.35	0.73	5.93	0.64	1.1	0.81	3.77	1.02	1.17	2.52	0.39	1.56
Contig12829	1.02	0	0	0	0.18	0.24	0.31	0.17	1.31	2.54	4.14	1.7	3.48	1.18	2.27	0.59	0.51	7.24	1.85	2.57	1.25	1.01	1.49	0.83	0.37	1.16	0.39	0.43	0.68	0.83	1.01	1.53	0.16	0.31	0.1	1.44	1.35	0.81	0.5	4.95	0.22	0.71	1.82	1.22	1.27	1.07	0.52	2.74	3.78
Contig43608	2.05	4.18	2.34	1.28	2.08	2.38	9.65	23.16	31.73	13.45	15.54	17.77	39.18	8.41	7.31	19.3	8.16	0	19.6	20.09	14.42	33.95	11.91	30.32	16.67	11.84	7.02	7.51	5.66	51.59	18.02	17.42	9.41	34.76	2.2	3.69	10.27	1.52	10.55	23.69	24.39	4.78	3.92	5.18	34.79	24.64	47.49	51.35	34.7
W5c25779|c2_g1_i1	0	0	0	0	0.42	0.08	0	0	0	7.36	0	1.23	0	0.14	0.28	3.66	0	0	0	0	0	26.37	0	0	0.23	0	0	0.67	0.24	0	0	1.66	1.24	0	0.46	0.26	0.21	0.28	0.2	0.47	1.21	0	0	0.38	0	0.48	2.25	0.18	0
W4a6247|c0_g1_i1	0.41	0.48	0.1	0.43	0.31	0.35	0.41	0.53	0.53	0.81	1.05	0.6	0.76	0.37	0.11	0.54	0.44	1.22	0.61	0.54	0.24	0.23	0.2	0.45	2.07	0.53	0.46	0.4	0.5	0.6	0.91	0.59	0.39	0.51	0.83	1.2	0.35	0.37	0.51	0.61	0.42	0.41	0.33	0.64	0.8	0.31	0.61	0.5	1.07
W4a18315|c0_g1_i1	1.46	0.24	0.42	0.49	0.71	0.66	0.89	1	0.96	5.35	3.9	2.23	1.07	1.3	1.89	1.87	2.51	3.68	1.58	2.42	0.6	0.62	1.19	4.37	3.87	0.61	2.35	0.96	0.54	1.24	2.23	1.84	1.01	0.75	0.87	5.21	0.75	0.87	2.01	2.93	1.06	1.14	0.22	1.07	1.35	4.25	0.42	2.64	5.17
W3d28528|c0_g1_i2	1.82	1.47	1.22	1.01	1.45	1.39	2.27	3.2	3.9	2.39	1.9	2.5	2.24	2.16	1.99	2.38	1.41	1.98	2.09	2.21	2.73	1.17	4.95	1.89	2.92	2.87	3.03	1.54	2.37	2.63	0.83	2.28	1.9	2.28	1.47	2.91	4.1	0.63	1.75	1.9	1.32	2.06	2.02	2.91	3.69	3.25	1.76	2.38	3.24
W2b24587|c0_g1_i1	0.76	1.2	0.36	0.3	0.6	0.64	1.31	1.53	2.39	1.9	1.08	1.61	1.02	2.33	3.08	0.73	1.24	0.64	1.92	1.11	1.75	1.13	0.34	0.97	1.1	1.76	2.79	1.28	1.48	1.76	0.99	1.44	1.45	0.49	2.2	1.38	1.37	1.35	1.36	1.17	1.57	0.77	1.43	1.49	1.43	0.62	1.68	2.16	2.67
Contig4731	0	0	0	0	0	0	0.08	0	0	0	0	0.28	3.08	0	0.14	0	0	0.04	0	0	0	0.04	1.55	0	0.2	0	0.08	0.1	0	0	0	0.28	0.06	0	0	0	0	0.04	0.1	2.48	0	0	0.27	0.1	0	0	0	4.21	0
W2b8127|c0_g1_i1	0	0	0.1	0	0	0.02	0	0	0	262.37	0	43.73	172.9	0	1272.66	0	0	0	0	0.13	0	0.7	0	0	6.86	0	0	0.1	0	0	0.32	76.51	0	0	0	0	53.59	0	9.24	0	0	21.59	0	0	2.95	0	0	0	40.65
W3d25964|c0_g2_i8	0.71	0.68	0.98	0.76	1.05	0.84	1.24	0.61	0.96	0.93	1.44	1.08	0.91	0.87	1.11	1.26	1.51	3.12	0.53	0.69	1.04	1.11	1.78	0.98	1.29	0.64	1.23	0.51	0.45	0.92	1.03	1.1	0.71	1.82	0.85	1.17	1.07	0.81	0.67	1.31	0.73	1.41	1.07	1.57	1.08	1.26	1.55	0.82	1.45
W7b4686|c0_g1_i3	0.35	0.34	0.32	0.34	0.53	0.38	1.39	1.01	2.27	0.35	0.46	0.98	0.5	0.46	0.58	0.5	1.08	0.54	1.19	1.39	1.01	1.19	0.61	1.27	0.56	0.41	1.61	0.63	1.01	1.08	0.82	0.86	0.49	0.72	0.26	0.94	0.8	0.48	0.8	0.58	0.86	1.23	2.38	1.57	3.92	1.28	0.78	1.36	1.29
W0d11106|c0_g2_i2	0.35	0	0.15	2.19	0.15	0.57	4.1	3.51	112.12	3.65	3.37	21.69	16.06	7.08	7.72	3.52	2.26	39.14	2.44	5.61	1.57	4.12	2.82	3.47	7	1.16	5.22	11.6	10.96	0.18	4.9	7.2	1.36	4.46	1.02	2.98	53.33	4.5	6.16	19.99	5.2	1.22	9.51	16.02	11.08	24.4	8.75	19.93	44.03
Contig10999	1.88	1.27	1.74	1.02	1.3	1.44	2.56	3.1	4.01	3.45	2.26	2.89	2.21	3.9	4.26	1.7	3.37	2.31	2.55	2.69	1.89	2.62	1.91	2.45	2.39	3.3	3.7	2.59	2.22	1.78	2.31	2.64	2.08	3.53	3.1	2.01	1.32	1.93	2.73	2.02	2.81	4.24	4.02	3.92	2.15	2.66	3.43	5.45	3.66
W1a19987|c0_g1_i2	6.15	4.39	7.92	1.39	4.21	4.81	4.09	33.79	3.48	49.49	245.29	70.95	32.84	22.82	22.88	42.11	16.63	1.51	7.82	20.16	38.46	37.28	20.2	12.5	48	44.06	10.45	32.72	23.27	115.98	14.18	29.68	25.73	4.64	32.77	23.89	43.16	7.54	34.25	14.66	25.06	34.48	11.91	36.17	46.31	81.85	56.83	100.25	20.77
Contig41107	1.04	0.32	0.81	1.06	0.86	0.82	2.17	2.21	0.98	3.57	3.79	3	2.35	2.61	1.81	2.22	4.24	2.92	2.81	3.31	1.31	2.23	2.08	2.54	1.36	0.98	3.28	1.52	1.75	3.37	2.44	2.38	1.55	2.99	1.19	1.53	2.26	1.51	2.57	3.17	2.56	1.39	2.47	2.55	5.6	3.46	7.65	4.61	2.86
W6b8510|c0_g2_i1	0.65	0.47	0.56	0.28	0	0.39	4.04	15.55	1.28	23.89	31.06	15.69	4.14	3.31	2.17	9.93	71.11	8	3.93	5.76	3.58	8.52	1.9	4.54	4.09	8.27	8.43	12.33	7.93	11.22	6.59	9.78	1.77	4.14	3.61	12.26	5.16	0.86	6.01	56.47	1.93	7.26	3.57	19.21	14.31	45.47	25.16	24.89	33.19
Contig25112	0	0.13	0	0	0	0.03	0.19	0.05	1.28	0.12	0	0.27	0.1	0.4	0.23	0	0	0.13	0	0	0	0.43	0.32	0.3	0	0	1.06	0	0.29	0.2	0.07	0.19	1.37	0	0.44	0	0.26	0.12	0	0	0.07	0	0	0	0.07	0.1	0	1.07	0.3
Contig5828	0.11	0.84	0	0	0	0.19	1.95	10.69	0.21	8.2	15.73	7.47	3.7	6.57	0.19	2.39	1.3	12.63	8.16	0.5	2.4	0.36	1.17	1.78	32.51	7.29	29.83	4.22	4.11	1.66	0.24	6.37	0	27.95	3.68	7.86	0.14	4.05	9.53	5.67	1.88	1.67	0.6	6.77	10.39	1.3	14.5	0.33	14.7
W1a7161|c0_g1_i5	0.04	0.47	0.27	0.23	0.31	0.27	0.27	1.72	0.75	2.29	1.21	3.85	0.97	0.59	0.75	1.45	1.46	1.88	0.86	3.47	1.67	0.83	1.74	1.35	1.57	2.1	2.45	1.02	1.85	1.99	3.28	1.65	0.9	1.36	1.03	2.41	1.3	0.47	1.76	1.47	2.79	2.49	1.1	1.97	1.57	1.73	3.77	3.87	1.71
W4a26259|c0_g1_i2	1.26	2.22	1.33	1.36	2.2	1.67	1.65	2.97	3.55	4.59	2.08	2.81	2.79	1.72	2.03	2.29	3.52	1.91	2.25	2.58	1.65	2.19	1.59	3.28	4.24	2.6	2.41	1.83	1.65	2.32	3.83	2.46	1.95	3.7	2.28	3.93	1.57	2.62	1.08	2.07	2.04	3.54	2.28	3.5	3.18	3.82	1.8	3.92	2.86
W2b24500|c0_g2_i2	0.36	0.8	4.07	0.72	0.41	1.27	4.61	29.07	11.83	25.28	24.7	16.54	2.11	4.01	10.78	13.05	36.57	21.96	2.3	7.74	2.81	10.53	1.51	8.58	2.74	6.27	9.36	3.41	6.07	17.5	8.34	9.24	3.24	18.52	3.67	6.41	3.3	6.1	9.96	14.47	5	5.97	5.88	22.01	8.38	32.03	16.13	29.75	79.01
W7b14058|c0_g2_i3	0.71	0.13	0.73	0.75	1.52	0.77	1.11	2.56	1.54	1.67	2.01	1.62	1.25	1.06	0.87	1.24	2.82	3.05	1.47	1.7	2.07	1.45	0.67	1.95	0.17	1.2	1.78	1.21	1.53	2.37	0.81	1.51	1.09	1.48	1.59	1.85	0.74	1.5	0.78	1.44	1.66	1.74	1.31	1.58	4.04	1.82	1.46	1.36	2.62
W1a3457|c0_g1_i3	1.93	1.65	1	0.25	1.93	1.35	2.42	4.03	1.8	2.11	1.92	5.16	3.41	1.98	1.76	3.18	2.64	4.46	3.21	2.39	1.8	2.26	1.78	2.86	2.17	2.88	6.49	3.05	3.11	3.93	4.96	3.07	1.63	1.74	2.93	4.14	2.86	2.57	4.55	3.28	2.77	2.61	3.8	3.66	2.71	5.73	5.76	3.65	2.99
W2b7632|c0_g1_i4	0.2	0.5	0.04	0.15	0.54	0.29	0.94	0.89	2.01	0.59	0.75	0.87	1.08	0.37	3.85	0.14	0.47	1.2	0.24	0.14	0.81	0.11	0.61	1.82	0.14	1.59	1.62	0.25	0.28	0.18	0.71	0.82	0.15	1.01	0.89	0.8	0.39	0.68	1.07	0.89	0.13	0.59	2.08	1.28	0.9	0.89	1.05	1.05	1.65
Contig21615	0.05	0.97	0.5	0.05	0.09	0.33	0.32	3.16	0.89	0.98	2.2	1.31	1.88	0.19	0.05	1.77	0.37	1.47	1.02	0.85	1.55	0.93	0.82	0.37	2.32	0.8	1.42	0.58	0.51	1.4	0.46	0.99	1.73	0.75	0.61	0.92	0.84	0.66	0.39	0	0.8	0.3	2.76	0.32	0.71	0.47	0.54	5.85	1.36
W4a27664|c0_g1_i4	1.87	1.73	1.22	1.52	1.1	1.49	2.83	5.06	3.62	6.44	2.96	4.06	2.29	3.22	4.3	2.79	3.49	3.54	3.58	4.24	2.11	2.91	1.86	3.66	3.77	3.42	5.9	2.49	2.08	3.27	3.86	3.3	3	4	3.4	3.54	1.98	3.15	3.14	2.75	2.38	3.29	3.7	5.37	5.75	4.85	4.51	4.13	4.66
W3d9220|c0_g1_i7	1.43	0.48	0.96	0.54	1.35	0.95	7.01	5.35	1.97	3.31	10.36	5.73	2.46	3.32	2.88	2.44	6.19	6.14	3.62	4.84	3.05	3.27	6.08	1.23	0.9	2.94	3.83	3.73	2.08	4.3	4.03	3.54	4.7	2.67	1.92	3.93	0.99	2.37	2.15	15.45	2.56	6.18	7.87	9.08	3.81	7.79	5.58	9.84	11.09
W5c12714|c0_g1_i2	1.64	0.95	1.83	0	0	0.89	5.9	47.88	9.26	26.44	27.58	25.18	4.97	6.58	4.11	11.02	52.04	11.17	7.18	17.9	5.11	4.87	4.18	9.6	3.91	3.73	24.39	9.73	12.44	18.92	11.56	11.76	13.34	18.63	5.09	36.23	10.69	13.13	7.93	11.37	12.99	16.57	16.75	8.86	17.6	28.96	52.97	53.46	64.48
Contig31445	4.37	7.96	12.22	10.66	3.12	7.67	33.69	181.88	82.11	170.18	244.75	146.13	42.14	39.23	29.33	105.4	251.9	121.49	36.73	72.2	28.2	58.92	33.56	61.33	50.63	36.86	99.89	68.64	53.53	129.51	45.07	71.82	53.09	126.83	43.27	97.84	44.87	74.61	112	193.43	83.1	66.77	55.7	168.28	98.31	229.33	209.35	246.91	391.26
Contig30971	0.36	0	0.13	0.25	0.76	0.3	3.86	0.3	0.5	5.58	18.09	7.14	2.49	1.3	1.17	3.28	8.21	0.3	2.65	3.6	1.97	0.8	1.14	2.81	3.95	1.72	4.78	4.32	2.44	8.47	2.08	3.03	3.81	0.82	2.05	7.22	1.84	2.33	5.5	7.51	3.08	2.55	1	3.15	5.76	3.16	3.84	12.13	6.79
W2b24500|c0_g2_i5	0.48	1.04	1.02	0.41	0.21	0.63	2.26	14.4	15.69	19.41	29.85	16.35	2.5	4.14	7.03	12.58	31.96	10.32	3.33	10.53	1.85	6.54	2.92	9.48	5.86	4.51	16.1	8.18	5.76	24.92	4.72	9.12	5.5	16.7	5.2	11.62	5.86	10.06	13.58	17.47	7.1	7.86	3.95	30.03	12.9	28.69	21.76	54.85	57.96
W1a19987|c0_g1_i4	1.37	0.11	1.96	0.49	0.89	0.96	4.66	15.25	0.45	25.53	129.04	35.7	7.16	10.04	3.15	12.34	8.29	0.59	4.42	13.46	11.75	9.38	5.68	11.59	13	13.91	10.44	14.85	5.33	45.17	4.64	10.8	11.66	3.38	15.67	16.69	14.07	5.56	23.4	4.78	14.31	16.13	5.5	22.27	26.91	40.86	25.62	45.54	11.81
W1a19987|c0_g1_i3	0.45	0.22	0.87	0.1	0.99	0.53	4.07	18.12	0.22	25.36	124.73	34.47	6.5	8.97	3.94	11.17	7.1	0.47	4.39	12.2	10.18	7.82	7.2	10.85	10.62	15.31	8.4	14.27	6.47	48.32	1.49	10.3	9.72	2.2	16.55	13.94	14.57	3.82	24.64	5.75	13.36	11.74	5.46	22.39	25.78	28.75	22.1	43.61	11.06
W4a18350|c2_g1_i1	1.22	0.2	0.17	0.35	0.35	0.46	0.2	0.33	1.41	1.81	0	0.63	0.32	0.91	0.91	0.39	1.22	0	0.49	0.47	0.33	0	0.4	0	1.62	0.77	0.79	0.34	0.61	0.42	0	0.52	0	0.83	0.79	0	0	0.36	0.5	0.6	0.22	0	0.56	1.22	0.85	1.52	0.79	0.34	0.07
W4a12710|c0_g2_i1	0	0.94	0	0	0	0.19	1.36	0	0	0	0	0.23	0	0	0	0	0.78	0	1.18	0	0	0.43	0	0	0.7	0	0.19	0	0	0.4	0	0.19	0	0	0	0.49	0	0.17	0	0	0	0	0	0	0	0	0	2.56	0
W7b8209|c0_g1_i1	0.85	0	1.58	0.86	1.48	0.95	0.99	0.7	0.28	1.13	2.07	1.01	0.44	1.39	1.26	1.63	0.85	0	1.54	0.32	1.62	0.78	2.21	0.99	0.2	1.87	0.27	2.39	2.31	2.16	0.16	1.18	0.66	0.58	0.41	0.71	0.56	1.26	0	1.25	0	0.59	0.97	0.68	3.97	0.85	1.09	1.9	2.3
W7b29739|c0_g1_i1	0.6	0.43	0.51	0.13	0.26	0.39	0.45	0.37	0.15	0.67	0.47	0.51	0.23	0.13	0.94	0.86	0.6	0.31	1.09	0.52	1.35	0.49	0.59	1.4	0.32	0.28	0.29	0.25	1	1.37	0.66	0.67	0	0	0.73	0.25	0.4	0.4	0.19	0.22	0	0	0.21	0.54	2.96	0.22	0.58	0.59	1.19
W7b18977|c0_g1_i1	0	0	0	0	0	0	0	0	0.33	0	0.23	0.09	0	0	0.1	0	0	0.46	3.23	0	0	0	0	0	0	0	0	0	0	0	0	0.2	0	0	0	0	0	0	0	0.25	0	0	0	0	5.08	0	0	0	0
W4a769|c0_g2_i1	1.55	0.35	0.41	0.41	0.73	0.69	0.12	2.45	1.18	0.53	0.87	0.96	0.93	1.17	0.75	0.8	0.83	0.12	2.17	1.37	1.27	1.96	0.23	0.42	1.89	0.23	0.69	1.62	0.53	0.61	1.84	1.02	0	0.12	1.39	1.09	0.79	1.06	0.3	0.18	1.68	0.5	1.81	1.43	0.62	1.43	0	1.47	3.52
W7b5114|c0_g2_i1	0	0.33	1.09	0	0.2	0.32	0	0.19	1.48	1.02	0	0.49	0.18	0.72	0	0.77	0	0	0	0	1.6	0.13	0.56	0.94	0.08	0.44	0.78	1.17	0.09	1.64	1.52	0.56	0.45	0	0	0.29	0.46	1.94	0	0	0.5	0	0	1.93	3.59	0.17	1.04	0.71	1.68
W1a18182|c0_g1_i1	0.17	9.91	4.41	4.78	0.2	3.89	0.28	0.37	22.98	0.55	0.06	15.32	0.22	0	0	47.07	4.77	0.12	0	146.23	55.91	72.7	5.46	0	0.08	0	0.54	3.01	0	257.22	46.95	33.7	0.18	0	0.11	368.75	5.02	4.16	14.3	0	0	0.08	0	24.2	0.35	6.74	27.17	0	0
W4a8725|c0_g1_i1	1.86	6.67	3.6	0.56	2.19	2.98	2.33	2.07	6.82	1.74	2.63	2.98	0.94	8.14	0.42	2.23	1.49	3.17	3.51	2.35	2.82	4.81	1.82	3.71	10.3	1.5	3.96	4.02	3.74	2.95	2.87	3.41	0.8	1.91	3.88	1.63	1.61	4.14	1.04	2.81	1.01	2.74	10.28	7.15	1.84	4.6	2.28	0.94	6.52
W6b13652|c0_g1_i4	1.62	0.73	1.58	0.28	0.38	0.92	0.22	0.89	5.45	0.67	0.56	1.3	1.59	1.83	0.48	0.41	1.18	0.33	1.7	1.49	0.44	2.01	0.74	1.01	0.23	1.23	0.42	0.82	1.52	1.1	0.71	1.01	0.51	0.33	0.84	0.72	0.14	1.53	0.13	3.1	1.29	1.06	1.04	1.29	1.24	0.81	2.5	1.42	1.86
W4a30986|c0_g1_i2	0.71	0.6	0.38	0.54	0.7	0.58	0.62	0.51	0.53	0.63	0.09	0.62	1.31	0.08	0.48	0.85	0	0.27	0.22	1.63	0.29	1.95	1.48	0.21	2.88	0.42	0.77	0.53	0.26	0.9	1.37	0.84	0.76	0.45	0	0.89	0	0.79	2.2	1.89	0	0.25	0.24	0	0.28	0.93	0.8	2.06	8.32
Contig45080	0.74	0.5	0.86	0.25	0.36	0.54	0	0.9	1.21	0.37	0.37	0.59	1.05	0.74	0.83	0.4	0.58	0.03	1.09	0.63	0.16	0.81	0.79	0.68	0.3	0.76	0.78	0.76	0.45	1.05	0.57	0.66	0.25	0.2	0.65	0.72	0.21	0.94	0.56	0.24	0.77	0.41	0.44	0.19	1.67	0.72	1.49	0.63	1.07
W7b366|c0_g1_i1	0	0.13	0	0	0	0.03	0	0	0	0	0.41	0.07	0	0	0	0	0	0	0	0	0.21	0.43	0	0	0	0	0	0	24.38	0	0	1.32	0	0	0	0	0	0	0	0	0	0	0.18	2.04	24.77	0	0	0.04	0
W4a3549|c0_g1_i1	0.17	0.2	0.3	0.36	0.84	0.37	0.07	0.26	1.57	0.37	0.07	0.44	0.24	0.28	0.4	0	0.03	0.11	0.67	0	0.48	0.27	0.24	1.33	4.85	0.75	1.07	0.35	0.26	0.07	0.23	0.61	0.14	1.1	0.4	0.43	0.46	0.77	0.04	0.05	0.64	0.34	0.14	1.29	0.36	0.72	0.53	0.66	0.4
W4a24502|c1_g2_i2	1.12	0.27	0.48	0.24	0.67	0.55	0.21	0.74	0.21	1.05	1.09	0.59	0.43	0.5	0.37	0.6	0.49	1.37	0.59	0.72	0.74	1.38	0.89	0.41	1.81	0.07	0.61	1.12	0.52	0.71	0.38	0.72	0.44	0.21	0.54	0.58	0.19	0.43	0.26	0.92	0.83	0.49	0.48	1.76	1.45	0.73	0.9	1.64	1.11
W2b24426|c0_g1_i7	0.69	0.19	0.13	0.43	0.17	0.32	0.25	0.53	0.24	0.09	0.88	0.36	0.5	0.57	3.13	0.19	0.54	0.2	0.36	0.23	0.32	0.27	0.05	0.23	0.82	0.75	0.33	0.17	0.15	0.15	1.41	0.55	0.15	0.1	0.48	0.41	0.2	0.35	0.43	0.22	0	0.07	1.5	0.36	0.46	0.15	0.25	0.15	0.46
W7b2539|c0_g1_i1	0	0	0.29	0.29	0.29	0.17	0	0.14	0	0.3	0	0.19	0.26	0.59	0	1.12	0	0	0	0.38	0.14	0.73	0	0	0	0	1.29	0.14	0	0.85	0.37	0.31	0.78	0	0.16	0	0	0.3	0	0.37	0	0.47	0	0	3.64	0	0.21	0.84	0
W0d30712|c0_g1_i2	3.37	4.75	2.94	4.92	0.5	3.3	1.25	2.14	2.95	1.8	8.79	3.35	4.22	4.25	1.46	6	4.32	2.88	4.27	3.15	3.74	5.97	2.45	2.93	2.05	3.74	4.32	3.1	8.37	4.81	2.7	3.93	3.61	5.22	4.2	3.33	1.34	1.67	3.87	5.75	1.1	1.69	2.19	2.66	2.86	2.88	4.21	6.09	9.08
W7b25091|c0_g1_i1	0	0	0	0	0	0	0.14	0	0	0	0	0.02	1.97	0	0	0	0	0	0	0.32	0	0	0	0	0.31	0	0	0	0	0	0	0.14	0	0	0	0	0	0.25	0	0	0	0	0	0	3.08	0	0	0	0
W3d16382|c0_g1_i1	0	0	0	0	0	0	0	0	0	0	0.41	0.08	0	0	0	0	0	0	0	0	0	0	6.21	0	0	0.03	0	0	0	8.21	0	0.76	0	0	0	0	0	0	0	0	2.01	0	0	0	0	0	0	0	0
W4a27567|c0_g1_i3	1.35	1.77	2.05	1.32	2.02	1.7	3.15	2.02	0.93	1.54	2.02	1.93	1.77	1.36	3.06	2.99	1.73	2.68	3.07	3.34	2.3	1.26	2.54	1.94	4.98	1.67	1.7	2.08	1.75	1.77	1.98	2.31	1.22	1.31	1.68	3.61	2.16	1.48	1.5	2.09	1.35	2.48	2.01	2.12	2.49	1.71	2.45	2.63	3.57
W4a17683|c0_g4_i3	0.38	0.37	0.49	0	0.82	0.41	0.19	0.16	0.75	0.17	0.59	0.38	0	0.17	1.01	0.36	0.19	0.58	0	0	1.08	1.25	0.37	0.44	0.82	0.36	0.91	0.32	0.14	0.19	1.04	0.49	0	0	0.37	0.47	0.5	0.17	1.87	0.97	0.41	0	0.26	0.23	0	0.57	1.46	0.42	0.56
W7b3572|c0_g1_i1	0.29	0	0	0.5	0.25	0.21	0	0	0.14	0	0.3	0.17	0.45	1.28	0	0	0.29	0	0.35	0.33	0	0	0.28	0	0.21	0.27	1.52	0.24	0.85	0	0.32	0.34	0.45	0.59	0.28	0.24	0	0.26	0	0	0	0	0.59	0.34	4.63	0.86	0	0.08	0.24
W7b25368|c0_g1_i1	0	0	0	0	0.4	0.08	0	0.09	0	0.1	0	0.03	0.09	0	0.82	0	0	0	0	0	0.75	0	0	0	0.17	0.22	0	0	0	0	1.64	0.19	0	0.12	0.11	0	0	0.2	0	0	0.25	0	0	0	3.35	0.17	0.44	0.06	0.72
Contig41946	0.53	0.13	0.23	0.85	0	0.35	0.33	0.49	0.52	0.12	0.07	0.29	0.2	0.06	1.12	0.63	2.03	0	0.56	0	0.11	1.08	0.39	0.08	0.48	0.37	0.83	0.78	0.05	0.54	0.43	0.51	0.31	0.34	0.19	0.44	0.26	0.76	0.41	0.19	0.07	0.28	0.09	0.32	2.67	0.39	0.08	0.83	1.55
W4a12395|c0_g1_i1	0	0	0.55	0	0.09	0.13	0.21	0.18	0	0	0.22	0.1	0	0	0	0	0	0.33	0	0	0.09	0.12	0.32	1.51	1.71	0.92	0	0.36	0	0	0.24	0.29	0	0.22	0	0.09	0.14	0	0	0	0.58	0	0.45	0.39	0	0.16	1.52	0.06	0
W7b9590|c0_g1_i1	0	0	0.16	0.16	0	0.06	0	0.15	0	0	0	0.03	0.88	0.17	0.17	0	0	0	0.23	0	0	0	0.18	0.44	0	0	0	0	1.4	0.96	0	0.23	0.15	0	0.36	0	0	0	0	0.14	0	0	0	0	3.72	0	1.21	0	0
W7b18932|c1_g2_i2	0	0	0.41	0.21	0.21	0.17	0.24	0.2	0	0.21	0	0.11	0	0.53	0.11	0.34	0.24	2.71	0.29	1.78	0.39	0.26	0.35	0.28	0.35	0.34	0.35	0	0	0	0	0.44	0	0	0.35	0.3	0	0.21	0	0.62	0.13	0.33	0	3.15	2.98	0.54	0	0.5	0.32
W6b8643|c0_g1_i1	1.86	1.15	1.24	1	2.01	1.45	1.23	1.18	1.14	1.98	1.46	1.27	1.65	1.91	1.28	1.69	1	1.32	2.44	3.4	1.9	1.88	1.1	1.56	1.08	1.53	1.73	1.9	1.8	1.65	1.27	1.69	1.06	1.18	1.37	1.8	0.81	1.29	1.92	3	1.12	0.95	0.61	1.23	2.11	1.18	1.5	1.87	4.06
Contig3249	0.34	0.1	0.14	2.52	0.12	0.64	0.51	0.22	0.37	0.21	0.25	0.29	0.56	0.33	0.65	1.18	0.81	0	0.9	0.99	1.08	0.83	0.35	0.37	0.24	0.67	0.89	0.46	0.56	1.43	1.69	0.74	0.67	0.38	0.34	0.51	0.69	0.31	0.46	0.78	0.13	0.26	0.42	0.55	0.46	1.49	1.82	0.77	0.73
Contig11119	0.27	0.82	0.73	0.23	0.47	0.5	0.19	1.11	0.11	0.65	0.32	0.42	0.48	0.21	2.48	0.18	0.61	0.44	0.56	0.57	0.5	0.46	1.05	1.35	0.47	1.89	0.59	0.52	0.54	1.18	1.31	0.81	0.03	0.12	0.6	0.51	0.31	0.85	0.81	1.33	0.42	0.27	0.27	0.32	0.6	1.84	1.88	0.83	2.08
W2b24709|c0_g1_i4	0.41	0.34	0.26	0.44	0.31	0.35	0.39	0.34	0.33	0.28	0.33	0.29	0.42	0.57	1.26	0.49	0.34	0.29	0.5	0.54	0.48	0.64	0.31	0.51	0.37	0.55	0.49	0.51	0.21	0.73	0.43	0.51	0.31	0.29	0.31	0.55	0.07	0.28	0.28	0.47	0.51	0.29	0.57	0.5	0.33	0.67	0.68	0.75	0.73
W7b5555|c0_g1_i2	0	0	0.13	0.13	0	0.05	0	0.06	0	0	0.39	0.08	0	0	0.13	0	0	0	0	0.17	0	0.16	0	0.09	0.11	0	0	0	0.67	0	0	0.07	0	0	0	0.12	0.1	0	0	0.05	0	0	0	0	7.14	0	0	0	0
W4a23657|c0_g1_i1	0.82	0.58	0.55	0.39	0.46	0.56	0.15	0.55	0.48	1.1	1.17	0.63	1.39	0.47	0.3	0.5	0.37	0.77	0.63	0.77	0.06	0.16	0.62	1.44	1.56	0.32	0.47	0.57	0.19	0.27	1.4	0.65	0.41	0.34	0.33	0.56	0.2	0.86	0.65	0.05	0.24	0.73	1.44	1.97	0.16	0.73	0.19	1.17	0.64
W0d22605|c0_g2_i1	0	0.4	0.18	1.16	0.45	0.44	0.51	0.51	0.51	0.46	0.32	0.39	0.4	0.64	0.09	0.49	0.82	0.53	0.12	0.47	0.42	0.45	0.1	0.48	0.07	0.29	0.5	0.17	0.69	1.26	0.57	0.45	0.24	0.11	0	0.26	0.14	0	0.51	0.15	0.11	0.43	0.71	0.37	0.54	0.92	0.79	1.18	1.43
Contig5711	0	0	0.22	0	0.88	0.22	0	0	0	0	0.26	0.27	0.29	0	0	0	0	0.26	0	0	0	0	0.25	0	7.22	0.12	0	0	1.97	0.26	0	0.55	0	0	0	0.11	4.2	0	0	0	0	0	0	0	0	0.95	0	0.04	0
W4a6553|c0_g1_i1	1.5	2.66	0.21	0	1.2	1.11	0	0.21	3.59	0.22	0.78	1.06	0.97	0	1.01	2.16	1.62	0	2.13	0.14	2.35	1.65	0	1.17	2.08	0.24	0.72	0.64	1.86	2.68	1.51	1.21	1.17	1.53	1.21	5.31	1	0	0	0.18	0.81	1.4	0.34	2.25	0.65	2.24	3.7	1.93	0.83
W7b4728|c0_g1_i4	0	0	0	0.13	0.26	0.08	0	0.25	0.3	0	0.16	0.12	0	0.13	0	0	0.15	0.78	0	0	0	0	0	0	0	1.14	0	0.13	0.22	0	0.5	0.16	0.12	0.31	0	0.25	0	0.13	0.19	0	0	0	0	0.72	2.67	0	0	0.3	0.3
W7b16454|c0_g1_i2	0.3	0.29	0	0	0.26	0.17	0	0.49	0.3	0	0.31	0.18	0.12	2	0.4	0	0.3	0	0.73	0.69	0	0	0	0.35	0.22	0	0	0	0.44	0	0.33	0.29	0	0.31	0	0	0	0	0	2.42	0	0	0.41	0	4.66	0	5.57	0.33	0.59
W7b23278|c0_g2_i3	0.94	1.69	1.32	0.59	2.57	1.42	1.2	1.51	4.78	1.18	0.58	1.65	2.55	1.75	1.03	0.66	0.47	1.5	1.4	0.83	2.2	0.94	2.05	2.95	0.99	1.62	5.03	1.52	1.97	0.57	2.68	1.72	0.43	1.84	1.33	2.31	1.93	2.62	2.12	0.63	1.34	1.8	1.71	4.51	7.21	2.43	4.12	1.76	2.37
W5c29461|c0_g2_i1	0	0	0	0	1.92	0.38	0	3.15	0	0	0	0.52	2.16	5.38	0	0	0	0	0	0	0	0.76	0	0	0.17	2.75	0	0	0	0	0.26	0.6	3.26	0	0	0	0	0	2.87	0	0	0	0	0.56	0	0	11.64	0	0.04
W7b8217|c0_g1_i1	0	0	0	0	0	0	0	0.17	0	0	0	0.03	0	0	0	0	5.92	0	0	0	0	0	0	0	0	0	0	0	0	0	0	0.31	0	0	0	0	0	0	0	0	0	0.3	0.15	0	61.58	0	0	0	0.07
Contig40655	0.17	0	0.29	0	0.15	0.12	0	0.28	0	0.07	0	0.19	0	0.15	0	0	0	0	0	0	0	0.55	0.08	0.2	1.03	0.87	1.62	0.21	0	0.68	2.58	0.42	0	0	0.16	0.42	0	0.15	0	0.19	0	1.17	0	1.11	5.75	1.25	1.83	0.26	5.47
W7b19514|c0_g1_i1	0	0.08	0.4	0.2	0.81	0.3	0.16	0	1.69	0.69	0.08	0.44	0.24	0.14	0.07	0.37	0.47	0.64	0.76	0	0.83	0	0.46	0	0	0.59	1.35	0.4	0.06	1.27	1.54	0.48	0.24	0.08	0.68	0.06	0.52	0.14	0.1	0.29	0.25	0.55	0.11	4.02	2.92	0.47	0.2	0.04	0.39
Contig44119	3.85	0.2	0.35	2.81	3.18	2.08	1.92	1.66	9.43	0	1.06	3.52	5.11	13.09	2.26	0	2.12	1.78	2.71	1.05	5.06	3.67	0.6	5.93	15.44	18.42	0	1.46	2.94	4.34	5.69	4.82	10.05	0.21	3.34	7.59	0	9.27	0.25	0	4.06	0.57	0	5.47	42.6	23.03	12.5	9.8	3.12
W7b23278|c0_g2_i1	2.49	1.72	1.3	2.07	2.39	2	1.49	3.93	1.02	1.12	2.56	1.8	3.14	2.51	1.79	0.25	0.87	3.23	3.34	1.41	4.45	1.63	1.42	4.16	1.03	3.98	3.37	1.04	3.1	1.38	2.17	2.33	0.51	1.45	3.1	1.72	1.46	2.15	2.8	0.62	1.51	2.31	3.03	4.61	9.96	1.93	4.36	2.94	1.82
W4a7731|c0_g2_i1	1.9	2.02	2.93	1.31	0.99	1.83	1.33	1.09	1.88	2.7	1.78	1.56	1.62	3.55	2.88	2.55	4.16	0.39	2.07	1.96	1.55	3.54	2.78	1.11	1.78	0.9	0.73	1.12	0.28	4.25	1.67	2.05	0.74	0	2.2	3.79	3.27	1.52	2.82	1.82	1.03	1.59	1.83	0.91	1.78	2.83	1.95	2.18	2.45
Contig16394	0.59	0	0	0.34	0	0.19	0.2	0.32	0	0	0	0.09	0	0	0	0	0.39	0	0	0	0.32	0.22	0.19	0	1.28	0	0	0.67	0	0.4	1.52	0.26	0	0.4	0.38	0.16	0.26	0	0	0	0	0	0	0.94	0	0	0.76	0.39	0.78
W4a30079|c0_g2_i2	0.48	0.92	1.23	0.34	0.55	0.7	0.4	0.78	0.39	0.28	0.25	0.6	0.74	1.27	0.43	0.53	0.47	1.47	0.87	0.18	1.3	0.61	0.31	1.3	2.23	1.88	0.31	1.55	0.06	1.62	0.17	0.91	0.19	0.16	1.08	0.99	0.63	0.21	1.08	0.12	0.26	0.22	1.2	0.48	1.98	0.95	1.22	0.49	1.89
Contig10135	4.02	3.36	2.87	3.63	3.78	3.53	2.44	3.26	5.18	3.38	2.26	3.26	4.98	4.14	3.95	3.81	3.2	5.82	3.95	3.42	2.48	3.32	3.4	5.49	4.4	3.59	3.62	3.25	3.22	3.18	4.52	3.88	3.53	4.25	3.06	3.54	1.92	4.01	2.63	3.46	2.25	4.05	2.68	5.2	4.65	3.85	3.54	6.77	5.87
W7b22565|c0_g4_i1	7.27	0.9	0.13	0.54	2.15	2.2	0.31	1.27	0	4.68	1.29	1.48	0.6	1.79	1.66	1.19	3.39	0.8	0.19	4.08	1.14	0.68	3.78	0.9	0	0.44	2.54	0.26	3.79	1.73	2.89	1.68	0.36	0.63	3	1.03	1.64	0.96	5.17	1.14	0.67	1.95	0.43	0.56	7.72	5.32	1.79	5.93	1.02
W6b1251|c0_g1_i1	3.92	9.27	7.52	3.97	1.96	5.33	2.75	4.59	6.61	2.6	2.52	3.85	7.32	3.79	3.88	8.24	2.49	1.2	6.99	1.53	2.39	6.69	0.65	9.66	5	8.85	10.06	2.97	4.9	10.55	4.32	5.34	3.39	11.94	4.04	4.38	1.22	7.56	3.1	8.11	9.13	3.98	2.19	30.73	2	4.49	6.11	7.2	2.57
W2b28099|c0_g1_i2	1.48	1.3	1.31	0.83	1.51	1.29	1.01	1.23	1.39	1.31	0.68	1.12	0.75	0.82	2.35	1.09	1.71	1.64	1.21	1.56	1.32	1	1.12	1.33	0.8	1.24	1.87	1.14	0.83	1.73	1.06	1.29	0.99	1.65	1.35	1.94	1.08	1.48	0.48	1.22	0.65	1.24	1.75	2.12	1.02	1.63	1.63	1.64	2.41
W7b15584|c0_g1_i1	0.84	0.81	1.2	0.24	0.85	0.79	0.28	1.03	1.11	0.37	0.15	0.69	1.09	0.75	0.25	2.28	0.84	0.58	0.68	0	0.46	3.84	0.55	0.33	1.01	0.13	1.08	2.13	0.62	1.71	0.31	0.98	0.76	1.43	0.68	0.35	1.3	0.5	0.17	0.31	2.12	1.37	0.58	1.01	5.39	0.84	0.54	1.96	0.79
W4a6892|c0_g1_i1	0.54	0	0	0	0.24	0.16	0	0	0.27	0.12	0	0.11	0.11	0	0	0	0.81	0	0	0.47	0	0	0	0.32	0.98	0	0.39	0	0.1	0.28	0.3	0.2	0.21	0	0	0	0	0.12	0	0.4	0.73	0	0	0.33	0	0	0.7	0.34	0.85
W7b17079|c0_g1_i1	0	0.35	0	0	0	0.07	0	0.3	0	0	0	0.05	0	0.33	0	0	0	0	0.44	0	0.45	0	0	0	0	0	0	0	0.27	0	0	0.08	0	0	0	0	0	0	0	0	0	1.03	0	0	1.14	0	0	0.72	0
W7b19696|c0_g1_i1	0.18	0.35	0	0	0.16	0.14	0	0	0	0	0	0	0.14	0	0.33	0.35	0.18	0.38	0	0.21	0.3	0.2	0.54	0	0.59	0	0.97	0.46	0	0.19	0	0.26	0.14	0.19	0	0	0	0	0.68	0	0.4	0	0	0.66	2.48	1.09	1.41	0.38	5.37
Contig43865	0.6	0.08	0.29	0	0.41	0.28	0.21	3.42	2.42	0.08	0.18	1.16	0	0.19	0.46	0	0.73	1.37	0.99	0.15	1.51	0.75	0	0.65	0.56	1.75	1.95	0.29	1.08	0.31	1.18	0.73	2.18	0.04	0.04	0.07	0.11	0.04	0.27	0.03	3.72	0.84	2.31	1.8	13.67	2.57	1.6	2.32	1.48
W6b10919|c2_g1_i5	0.18	0	0.63	0	0	0.16	0	0.3	0	1.3	1.14	0.52	0	0.49	0.16	1.75	0.36	0	0	0	0.75	0.6	0	0.43	0.39	1.04	0.35	0.15	0.41	0.56	0.4	0.41	0.14	0.37	0	0	0.24	0	0.23	2.95	0.2	0.51	0.5	0	0.19	1.91	2.11	0.92	0.79
W0d12487|c0_g1_i5	0.78	0.56	0.39	1.69	0.79	0.84	0.65	1.33	1.16	1.04	1.22	1.23	1.06	1.56	1.45	1.56	1.49	1.07	2.05	1.64	0.21	1	1.08	0.84	0.98	1.04	1.5	1.43	0.82	1.72	0.5	1.21	1.37	1.2	1.2	0.54	0.78	0.87	1.21	2.53	1.76	0.82	0.63	1.01	2.16	0.78	2.67	2.57	1.38
Contig23705	0.5	0.24	0.43	0.22	0	0.28	1.38	0	1.12	0.45	0.26	0.53	0.19	0.45	0	2.17	0.25	0	0	0.58	0	0	0.12	0.88	0.18	2.26	0.24	0.43	0.47	1.79	0.55	0.56	1.77	0.9	0.24	0.21	0.33	0.33	0.78	0.74	0.27	0	0	0.3	1.31	1.31	0.65	1.27	0.37
W1a16383|c1_g3_i2	0	0.28	0.25	0	0	0.11	0.15	1.8	0	0.39	4.43	1.9	2.84	1.96	0.39	3.79	2.63	1.51	0	0.34	0	0	4.01	0.34	8.35	1.52	4.1	0.99	0.22	0.9	0	1.78	0	2.54	1.42	1.95	0	2.21	2.36	0.65	0.32	0.82	0	7.73	0.91	5.47	3.2	0.82	4.8
W4a24987|c0_g1_i1	0	0	0	0	0	0	0	0	0	4.48	0	0.75	0	0	9.28	0	0	0	0	0	0	0	0	0	21.25	0	0	0	0	0	0	1.61	0	0	0	0	7.96	0	0	0	0	0	0	0	5.63	0	0	0	13.21
W7b29850|c0_g1_i1	0.53	0	0	0.15	0.77	0.29	0	1.6	0.53	0.63	0	0.52	0	0.32	1.43	0	0	0	0.22	0	0.87	0.78	0	0.62	0	3.02	0.51	0.6	0.53	1.09	1.76	0.62	0.28	1.45	0.86	0.15	0	0.16	0	0	0.58	0	1.96	0.21	2.77	0.53	0	0.35	0.47
Contig4943	0	0	0	0	0.21	0.04	0.12	0.29	0.71	0.64	0.75	0.82	0.37	0.11	0.43	1.03	1.67	11.84	0.29	1.51	0.2	0.13	0.23	0	0.17	0.34	0.69	0.1	0.18	0.24	1.18	1.09	0.93	0	0.7	0	0.16	0.43	0.3	0.88	1.3	0.34	0	1.58	2.12	2.68	0.62	2.05	6.58
W2b1762|c0_g1_i1	0.14	0.34	0.12	1.02	0.67	0.46	1.25	1.48	1.58	0.43	0.58	0.91	0.22	2.16	2.67	0	0.35	0.14	0.34	0.16	0.51	0.23	0.75	2.44	2.51	0.92	1.67	0.06	0.57	0.71	2.83	1.01	0.43	0.64	0.2	2.31	0.28	0.25	0.34	0.31	0.38	1.65	2.78	0.5	1.01	0.83	1.87	4.05	1.33
W7b17983|c0_g3_i1	0	0	0	0	0	0	0.54	1	0	0.72	7.92	1.75	0.11	0.24	0	1.56	2.7	1.26	0	0.31	0	0.15	2.26	0.63	7.44	0	2.62	0.69	7.15	1.52	0	1.51	0.11	0.14	0.53	2.6	0.18	0.24	0.34	0.6	0.59	0	0.93	1.63	16.09	3.04	0.7	0.15	3.24
Contig22845	0.96	0.33	0.49	0.2	1.38	0.67	0.34	1.72	8.08	0.5	2.6	2.39	1.01	0.91	0.41	1.36	0.34	0.23	1.38	4.1	1.49	3.86	2.89	1.59	4.3	1.93	3.5	3.6	2.78	7.11	5.68	2.55	1.37	2.55	1.26	1.04	1.28	0.3	5.19	0.58	7.8	0.64	0.16	1.22	6.67	2.03	11.81	8.4	5.28
W5c6326|c0_g1_i2	6.86	7.12	3.64	2.84	5.4	5.17	5.24	7.54	9.03	5.79	4	6.58	10.29	11.55	5.86	7.79	5.78	7.17	6.8	5.15	6.73	7.47	4.1	4.84	6.12	5.59	6.42	5.38	5.43	7.51	6.1	6.64	9.77	9.28	5.72	8.06	4.96	4.35	4.18	5.05	5.63	6.08	8.14	9.38	7.72	5.35	8.23	11.9	8.66
Contig13455	0.2	0.15	0.07	0.27	0.85	0.31	2.15	0.42	0.19	1.22	1.67	1.39	0.67	0.49	1.19	1.5	0.78	1.01	0.57	2.02	0.99	1.03	4.32	1.78	0.62	1.15	2.07	3.51	0.23	1.23	4.94	1.58	0.7	0.76	0.64	2.34	0.42	0.56	1.16	6.59	0.3	0.82	0.32	3.14	1.63	2.92	3.36	9.58	2.77
W4a10115|c0_g1_i1	0.86	0.69	0.98	0.57	1.45	0.91	1.26	1.95	2.38	1.6	0.63	1.41	1.13	0.84	0.49	0.91	1.91	1.56	0.87	1.15	1.1	1.19	0.67	1.27	1.92	0.92	1.99	1.24	1.06	1.52	1.35	1.22	0.8	1.55	2.25	2.05	0.61	0.97	0.42	0.86	1.02	2.17	2.64	2.37	1.52	1.71	1.03	1.94	2.3
[truncated: 23,815 more rows]
[truncated: 11 more columns]
